# Supplementary material
Source: PubMed Central journal article supplement (PMC4438327)
Supplement: ismej2014225x3.pdf [file ismej2014225x3.pdf]

**Supplementary Table S1** Utilization of mono-, di-, tri-, and polysaccharides by *Polaribacter* strains. All strains were negative for growth on L-rhamnose and D-trehalose.

|                                       | <i>P. sp.</i><br>Hel1_85 | <i>P. sp.</i><br>Hel1_33_49 | <sup>a</sup> <i>P. irgensii</i><br>23-P <sup>T</sup> | <sup>b</sup> <i>P. dokdonensis</i><br>DSW-5 <sup>T</sup> | <sup>c</sup> <i>P. butkevichii</i><br>KMM 3938 <sup>T</sup> | <sup>a</sup> <i>P. franzmannii</i><br>301 <sup>T</sup> |
|---------------------------------------|--------------------------|-----------------------------|------------------------------------------------------|----------------------------------------------------------|-------------------------------------------------------------|--------------------------------------------------------|
| Temperature for growth from [°C]      | 8                        | -2                          | -1.5                                                 | 4                                                        | 4                                                           | 4                                                      |
| Temperature for growth to [°C]        | 28                       | 22                          | 17                                                   | 33                                                       | 32                                                          | 10                                                     |
| Temperature optimum [°C]              | 22                       | 14                          | 12                                                   | 26                                                       | 22                                                          | NA                                                     |
| Utilization of amino acids:           |                          |                             |                                                      |                                                          |                                                             |                                                        |
| Casamino acids                        | +                        | +                           | +                                                    | -                                                        | NA <sup>f</sup>                                             | +                                                      |
| Peptone tryptone                      | +                        | +                           | NA <sup>f</sup>                                      | +                                                        | NA <sup>f</sup>                                             | NA <sup>f</sup>                                        |
| Yeast extract                         | +                        | +                           | +                                                    | NA <sup>f</sup>                                          | NA <sup>f</sup>                                             | +                                                      |
| Gelatin                               | +                        | +                           | -                                                    | NA                                                       | +                                                           | +                                                      |
| Utilization of monosaccharides:       |                          |                             |                                                      |                                                          |                                                             |                                                        |
| D-galactose                           | +                        | -                           | +                                                    | -                                                        | +                                                           | +                                                      |
| D-mannose                             | +                        | +                           | +                                                    | -                                                        | +                                                           | +                                                      |
| D-fructose                            | +                        | -                           | -                                                    | -/+ <sup>d</sup>                                         | NA                                                          | +                                                      |
| D-glucose                             | -                        | +                           | +                                                    | -/+ <sup>d</sup>                                         | +                                                           | +                                                      |
| D-mannitol                            | +                        | -                           | NA                                                   | -                                                        | +                                                           | -                                                      |
| DL-xylose                             | +                        | -                           | -                                                    | -                                                        | +                                                           | -                                                      |
| DL-arabinose                          | -                        | +                           | -                                                    | -                                                        | -                                                           | -                                                      |
| Utilization of di-, trisaccharides:   |                          |                             |                                                      |                                                          |                                                             |                                                        |
| D-sucrose                             | +                        | -                           | -                                                    | -/+ <sup>d</sup>                                         | -                                                           | +                                                      |
| D-maltose                             | +                        | +                           | -                                                    | -                                                        | NA                                                          | +                                                      |
| D-cellobiose                          | -                        | +                           | -                                                    | -/+ <sup>d</sup>                                         | NA                                                          | -                                                      |
| L-raffinose                           | -                        | +                           | -                                                    | +                                                        | NA                                                          | -                                                      |
| Utilization of N-acetyl-D-glucosamine |                          |                             |                                                      |                                                          |                                                             |                                                        |
|                                       | -                        | -                           | -                                                    | -                                                        | -                                                           | +                                                      |

|                                 | <i>P. sp.</i><br>Hel1_85 | <i>P. sp.</i><br>Hel1_33_49 | <sup>a</sup> <i>P. irgensii</i><br>23-P <sup>T</sup> | <sup>b</sup> <i>P. dokdonensis</i><br>DSW-5 <sup>T</sup> | <sup>c</sup> <i>P. butkevichii</i><br>KMM 3938 <sup>T</sup> | <sup>a</sup> <i>P. franzmannii</i><br>301 <sup>T</sup> |
|---------------------------------|--------------------------|-----------------------------|------------------------------------------------------|----------------------------------------------------------|-------------------------------------------------------------|--------------------------------------------------------|
| Utilization of polysaccharides: |                          |                             |                                                      |                                                          |                                                             |                                                        |
| Cellulose (filter)              | +                        | + <sup>-</sup>              | NA                                                   | -                                                        | -                                                           |                                                        |
| Carboxymethyl cellulose         | +                        | +                           | NA                                                   | NA                                                       | -/+ <sup>e</sup>                                            | NA                                                     |
| Laminarin                       | +                        | +                           | NA                                                   | NA                                                       | NA                                                          | NA                                                     |
| Agar                            | +                        | +                           | NA <sup>-d</sup>                                     | -                                                        | NA                                                          |                                                        |
| Xanthan                         | +                        | +                           | NA                                                   | NA                                                       | NA                                                          | NA                                                     |
| Carrageenan (κ and ι)           | +                        | +                           | NA                                                   | NA                                                       | NA                                                          | NA                                                     |
| Chondroitin sulfate             | +                        | +                           | NA                                                   | NA                                                       | NA                                                          | NA                                                     |
| Glycogen                        | +                        | +                           | NA <sup>+d</sup>                                     | NA                                                       | NA                                                          |                                                        |

<sup>a</sup> data from Gosink *et al.* (1998).

<sup>b</sup> data from Yoon *et al.* (2006).

<sup>c</sup> data from Nedashkovskaya *et al.* (2006).

<sup>d</sup> data from Fukui *et al.* (2013).

<sup>e</sup> data from Kim *et al.* (2013).

<sup>f</sup> grew on marine broth 2216.

NA: not available.
