# Supplementary material
Source: PubMed Central journal article supplement (PMC4438327)
Supplement: ismej2014225x4.pdf [file ismej2014225x4.pdf]

**Supplementary Table S2** Manual annotations of CAZymes and sulfatases in *Polaribacter* sp. Hel1\_33\_49 and *Polaribacter* sp. Hel1\_85.

| Locus      | Product                                                                                  | EC number | CAZyme family    | Gene         |
|------------|------------------------------------------------------------------------------------------|-----------|------------------|--------------|
| PHEL49_91  | 3-deoxy-D-manno-octulosonic-acid transferase, GT30 family                                | 2.-.-.-   | GT30             | <i>kdtA</i>  |
| PHEL49_120 | lipopolysaccharide core biosynthesis glycosyltransferase, GT4 family                     |           | GT4              | <i>lpsB</i>  |
| PHEL49_134 | conserved hypothetical protein (DUF1083), N-terminal CBMnc domain                        |           | CBMnc            |              |
| PHEL49_164 | penicillin-binding protein 1A, GT51 family                                               | 2.4.1.129 | GT51             | <i>pbp1A</i> |
| PHEL49_169 | membrane-bound lytic murein transglycosylase D precursor, two CBM50 domains, GH23 family | 4.2.2.n1  | GH23, CBM50 (2x) | <i>mltD</i>  |
| PHEL49_213 | glycosyltransferase, GT4 family                                                          | 2.4.1.-   | GT4              |              |
| PHEL49_215 | glycosyltransferase, GT4 family                                                          | 2.4.1.-   | GT4              |              |
| PHEL49_216 | putative glycosyltransferase                                                             |           |                  |              |
| PHEL49_217 | glycosyltransferase, GT2 family                                                          | 2.4.1.-   | GT2              |              |
| PHEL49_321 | endo-beta-N-acetylglucosaminidase, CBM50 domain, GH73 family                             | 3.2.1.-   | GH73, CBM50      |              |
| PHEL49_359 | glycoside hydrolase, CBM48 domain, GH13 family                                           |           | GH13, CBM48      |              |
| PHEL49_367 | maltose phosphorylase, GH65 family                                                       | 2.4.1.8   | GH65             | <i>mapA</i>  |
| PHEL49_368 | putative neopullanase, GH13 family                                                       | 3.2.1.135 | GH13             | <i>susA</i>  |
| PHEL49_369 | carbohydrate esterase, CE1 family                                                        | 3.1.1.-   | CE1              |              |
| PHEL49_370 | glycoside hydrolase, GH31 family                                                         |           | GH31             |              |
| PHEL49_371 | glycoside hydrolase, GH13 family                                                         |           | GH13             |              |
| PHEL49_372 | maltoXose-producing alpha-amylase, GH13-19 family                                        | 3.2.1.-   | GH13-19          | <i>amy</i>   |
| PHEL49_394 | conserved hypothetical protein (FUF1083), N-terminal CBMnc domain                        |           | CBMnc            |              |
| PHEL49_453 | carbohydrate-binding protein, CBM48 domain                                               |           | CBM48            |              |
| PHEL49_490 | glycosyltransferase, GT4 family                                                          | 2.4.1.-   | GT4              |              |
| PHEL49_498 | arylsulfate sulfotransferase                                                             | 2.8.2.22  | AssT             | <i>assT</i>  |
| PHEL49_632 | glycosyltransferase, GT2 family                                                          | 2.4.1.-   | GT2              |              |
| PHEL49_634 | putative mannosyltransferase, GT4 family                                                 | 2.4.1.-   | GT4              |              |
| PHEL49_635 | glycosyltransferase, GT2 family                                                          | 2.4.1.-   | GT2              |              |
| PHEL49_636 | glycosyltransferase, GT4 family                                                          | 2.4.1.-   | GT4              |              |
| PHEL49_638 | glycosyltransferase, GT2 family                                                          | 2.4.1.-   | GT2              |              |
| PHEL49_640 | FAD-dependent GMC oxidoreductase, AAnc family                                            |           | AAnc             |              |
| PHEL49_644 | cholesterol oxidase, AA3 family                                                          |           | AA3              |              |
| PHEL49_644 | cholesterol oxidase, AA3 family                                                          |           | AA3              |              |
| PHEL49_644 | cholesterol oxidase, AA3 family                                                          |           | AA3              |              |
| PHEL49_677 | glycoside hydrolase, GH113 family                                                        |           | GH113            |              |
| PHEL49_681 | glycosyltransferase, GT2 family                                                          | 2.4.1.-   | GT2              |              |
| PHEL49_682 | glycosyltransferase, GT2 family                                                          | 2.4.1.-   | GT2              |              |

|             |                                                                             |                   |                   |              |
|-------------|-----------------------------------------------------------------------------|-------------------|-------------------|--------------|
| PHEL49_693  | glycosyltransferase, GHnc family                                            | 3.2.1.-           | GHnc              |              |
| PHEL49_709  | glucosylceramidase, GH30-1 family                                           | 3.2.1.45          | GH30-1            | <i>gbaA</i>  |
| PHEL49_710  | putative endo-1,3-beta-glucanase, GH16 family                               | 3.2.1.39          | GH16              |              |
| PHEL49_711  | glycoside hydrolase, two CBM6 domains, GH5-46 family                        | 3.2.1.-           | GH5-46, CBM6 (2x) |              |
| PHEL49_748  | putative feruloyl esterase, CE1 family                                      | 3.1.1.73          | CE1               |              |
| PHEL49_761  | putative glycoside hydrolase, GH16 family                                   |                   | GH16              |              |
| PHEL49_876  | beta-glucosidase, GH3 family                                                | 3.2.1.21          | GH3               | <i>bglX1</i> |
| PHEL49_926  | glycoside hydrolase, GHnc family                                            | 3.2.1.-           | GHnc              |              |
| PHEL49_935  | glycoside hydrolase, GHnc family                                            | 3.2.1.-           | GHnc              |              |
| PHEL49_1016 | putative carbohydrate esterase, CEnc family                                 |                   | CEnc              |              |
| PHEL49_1077 | dolichol-phosphate mannosyltransferase, GT2 family                          | 2.4.1.83          | GT2               | <i>ppmA</i>  |
| PHEL49_1084 | glycosyltransferase, GT5 family                                             | 2.4.1.-           | GT5               |              |
| PHEL49_1176 | glycosyltransferase WbsX family protein                                     |                   |                   |              |
| PHEL49_1177 | glycosyltransferase WbsX family protein                                     |                   |                   |              |
| PHEL49_1178 | glycosyltransferase, GT4 family                                             | 2.4.1.-           | GT4               |              |
| PHEL49_1179 | putative glycosyltransferase                                                |                   |                   |              |
| PHEL49_1180 | glycosyltransferase, GT4 family                                             | 2.4.1.-           | GT4               |              |
| PHEL49_1183 | glycosyltransferase, GT4 family                                             | 2.4.1.-           | GT4               |              |
| PHEL49_1198 | peptidoglycan-binding LysM domain protein, CBM50 domain                     |                   | CBM50             |              |
| PHEL49_1248 | catalase / peroxidase                                                       | 1.11.1.21         | AAnc              | <i>katG</i>  |
| PHEL49_1257 | beta-N-acetylglucosaminidase, GH3 family / serine peptidase, S12 family     | 3.2.1.52/3.4.21.- | GH3, S12          |              |
| PHEL49_1268 | glycosyltransferase, GT4 family                                             | 2.4.1.-           | GT4               |              |
| PHEL49_1269 | glycosyltransferase, GT4 family                                             | 2.4.1.-           | GT4               |              |
| PHEL49_1323 | sulfatase (S1-51) / glycoside hydrolase (GH99)                              |                   | S1-51, GH99       |              |
| PHEL49_1327 | putative glycoside hydrolase, GH99 family                                   |                   | GH99              |              |
| PHEL49_1328 | putative glycoside hydrolase, GH99 family                                   |                   | GH99              |              |
| PHEL49_1329 | alpha-1,2-mannosidase, GH92 family                                          | 3.2.1.-           | GH92              |              |
| PHEL49_1330 | alpha-1,2-mannosidase, GH92 family                                          | 3.2.1.-           | GH92              |              |
| PHEL49_1332 | sulfatase, S1-15 family                                                     |                   | S1-15             |              |
| PHEL49_1333 | sulfatase, S1-nc family                                                     |                   | S1-nc             |              |
| PHEL49_1334 | sulfatase, S1-51 family                                                     |                   | S1-51             |              |
| PHEL49_1336 | sulfatase, S1-nc family                                                     |                   | S1-nc             |              |
| PHEL49_1339 | alpha-1,2-mannosidase, GH92 family                                          | 3.2.1.-           | GH92              |              |
| PHEL49_1340 | beta-glucosidase, GH3 family                                                | 3.2.1.21          | GH3               | <i>bglX2</i> |
| PHEL49_1341 | beta-glucosidase, GH3 family                                                | 3.2.1.21          | GH3               | <i>bglX3</i> |
| PHEL49_1342 | mucin-desulfating sulfatase (N-acetylglucosamine-6-sulfatase), S1-11 family | 3.1.6.14          | S1-11             |              |
| PHEL49_1345 | alpha-1,2-mannosidase, GH92 family                                          | 3.2.1.-           | GH92              |              |
| PHEL49_1354 | unsaturated glucuronyl hydrolase, GH88 family                               | 3.2.1.179         | GH88              | <i>uglA1</i> |

|             |                                                                                                                                                   |                   |             |                    |
|-------------|---------------------------------------------------------------------------------------------------------------------------------------------------|-------------------|-------------|--------------------|
| PHEL49_1356 | alpha-1,2-mannosidase, GH92 family                                                                                                                | 3.2.1.-           | GH92        |                    |
| PHEL49_1357 | beta-galactosidase, GH2 family                                                                                                                    | 3.2.1.23          | GH2         | <i>bgaC</i>        |
| PHEL49_1358 | sulfatase, S1-71 family                                                                                                                           |                   | S1-71       |                    |
| PHEL49_1359 | mucin-desulfating sulfatase (N-acetylglucosamine-6-sulfatase), S1-11 family                                                                       | 3.1.6.14          | S1-11       |                    |
| PHEL49_1360 | iduronate-2-sulfatase, S1-7 family                                                                                                                | 3.1.6.13          | S1-7        |                    |
| PHEL49_1373 | endo-1,3(4)-beta-glucanase, GH16 family                                                                                                           | 3.2.1.6           | GH16        | <i>lamC1</i>       |
| PHEL49_1384 | beta-hexosaminidase, GH20 family                                                                                                                  | 3.2.1.52          | GH20        | <i>nahA1</i>       |
| PHEL49_1398 | carbohydrate esterase, CE14 family                                                                                                                | 3.5.1.-           | CE14        |                    |
| PHEL49_1438 | glycosyltransferase, GT2 family                                                                                                                   | 2.4.1.-           | GT2         |                    |
| PHEL49_1439 | beta-mannosidase, GH2 family                                                                                                                      | 3.2.1.25          | GH2         |                    |
| PHEL49_1441 | beta-N-acetylhexosaminidase, GH20 family                                                                                                          | 3.2.1.52          | GH20        | <i>nahA2</i>       |
| PHEL49_1442 | alpha-1,2-mannosidase, CBM32 domain, GH92 family                                                                                                  | 3.2.1.-           | GH92, CBM32 |                    |
| PHEL49_1474 | lipopolysaccharide core biosynthesis glycosyltransferase, GT2 family                                                                              | 2.4.1.-           | GT2         | <i>waaE</i>        |
| PHEL49_1475 | glycosyltransferase, GT2 family                                                                                                                   | 2.4.1.-           | GT2         |                    |
| PHEL49_1477 | sulfatase                                                                                                                                         |                   | S1-nc       |                    |
| PHEL49_1482 | undecaprenyl-phosphate 4-deoxy-4-formamido-L-arabinose transferase, GT2 family                                                                    | 2.7.8.-           | GT2         | <i>arnC</i>        |
| PHEL49_1499 | endo-1,3-beta-xylanase, GH26 family                                                                                                               | 3.2.1.32          | GH26        | <i>txyA</i>        |
| PHEL49_1561 | glycosyltransferase, GT2 family                                                                                                                   | 2.4.1.-           | GT2         |                    |
| PHEL49_1579 | glycoside hydrolase, GHnc family                                                                                                                  | 3.2.1.-           | GHnc        |                    |
| PHEL49_1580 | glycoside hydrolase, GHnc family                                                                                                                  | 3.2.1.-           | GHnc        |                    |
| PHEL49_1617 | hypothetical protein containing three putative carbohydrate binding modules, CBM61                                                                |                   | CBM61       |                    |
| PHEL49_1618 | putative endo-1,3(4)-beta-glucanase, GH81 family                                                                                                  | 3.2.1.6           | GH81        |                    |
| PHEL49_1644 | carbohydrate binding protein, CBM9 domain                                                                                                         |                   | CBM9        |                    |
| PHEL49_1673 | sulfatase                                                                                                                                         |                   | S1-nc       |                    |
| PHEL49_1705 | glycosyltransferase, GT2 family                                                                                                                   | 2.4.1.-           | GT2         |                    |
| PHEL49_1776 | endo-1,3(4)-beta-glucanase, GH16 family                                                                                                           | 3.2.1.6           | GH16        | <i>lamA1</i>       |
| PHEL49_1806 | glycosyltransferase, GT4 family                                                                                                                   | 2.4.1.-           | GT4         |                    |
| PHEL49_1900 | conserved hypothetical protein, sialidase domain, GH74 family                                                                                     |                   | GH74        |                    |
| PHEL49_1939 | bifunctional UDP-3-O-[3-hydroxymyristoyl] N-acetylglucosamine deacetylase / (3R)-hydroxymyristoyl-[acyl-carrier protein] dehydratase, CE11 family | 3.5.1.- / 4.2.1.- | CE11        | <i>lpxC / fabZ</i> |
| PHEL49_1992 | carbohydrate esterase, CE14 family                                                                                                                | 3.1.1.-           | CE14        |                    |
| PHEL49_2041 | lytic murein exotransglycosylase, GH23 family                                                                                                     | 4.2.2.n1          | GH23        |                    |
| PHEL49_2066 | glycoside hydrolase, GHnc family                                                                                                                  | 3.2.1.-           | GHnc        |                    |
| PHEL49_2071 | carbohydrate binding protein, CBM4 domain                                                                                                         |                   | CBM4        |                    |
| PHEL49_2074 | glucan 1,3-beta-glucosidase, GH17 family                                                                                                          | 3.2.1.58          | GH17        |                    |
| PHEL49_2076 | glucosylceramidase, GH30-1 family                                                                                                                 | 3.2.1.45          | GH30-1      |                    |
| PHEL49_2077 | glycoside hydrolase, GH17 family                                                                                                                  |                   | GH17        |                    |
| PHEL49_2078 | beta-glucosidase, GH3 family                                                                                                                      | 3.2.1.21          | GH3         | <i>bglX4</i>       |

|             |                                                                                                                                  |           |               |              |
|-------------|----------------------------------------------------------------------------------------------------------------------------------|-----------|---------------|--------------|
| PHEL49_2080 | endo-1,3(4)-beta-glucanase, GH16 family                                                                                          | 3.2.1.6   | GH16          | <i>lamC2</i> |
| PHEL49_2081 | conserved hypothetical protein, CBM23 and CBM8 domains                                                                           |           | CBM23, CBM8   |              |
| PHEL49_2082 | glycoside hydrolase, GHnc family                                                                                                 | 3.2.1.-   | GHnc          |              |
| PHEL49_2199 | glycosyltransferase, GT2 family                                                                                                  | 2.4.1.-   | GT2           |              |
| PHEL49_2210 | glycosyltransferase, GT2 family                                                                                                  | 2.4.1.-   | GT2           |              |
| PHEL49_2214 | carbohydrate binding protein, CBM50 domain                                                                                       |           | CBM50         | <i>ygaU</i>  |
| PHEL49_2234 | capsular glucan synthase, GT4 family                                                                                             | 2.4.1.21  | GT4           | <i>glgA</i>  |
| PHEL49_2236 | putative alpha-1,4-glucan: phosphate maltosyltransferase, GH13-3 family                                                          | 2.4.1.-   | GH13-3        | <i>glgE</i>  |
| PHEL49_2237 | 1,4-alpha-glucan branching enzyme, CBM48 domain, GH13-9 family                                                                   | 2.4.1.18  | GH13-9, CBM48 | <i>glgB</i>  |
| PHEL49_2239 | alpha-glucosidase, GH31 family                                                                                                   | 3.2.1.20  | GH31          | <i>malA</i>  |
| PHEL49_2274 | endo-1,3(4)-beta-glucanase, GH16 family                                                                                          | 3.2.1.6   | GH16          | <i>lamA2</i> |
| PHEL49_2323 | lytic murein exotransglycosylase, GH23 family                                                                                    | 4.2.2.n1  | GH23          | <i>mltF</i>  |
| PHEL49_2324 | glycosyltransferase, GT2 family                                                                                                  | 2.4.1.-   | GT2           |              |
| PHEL49_2325 | glycosyltransferase, GT4 family                                                                                                  | 2.4.1.-   | GT4           |              |
| PHEL49_2400 | lipid-A-disaccharide synthase, GT19 family                                                                                       | 2.4.1.182 | GT19          | <i>lpxB</i>  |
| PHEL49_2421 | UDP-N-acetylglucosamine-N-acetylmuramyl- (pentapeptide) pyrophosphoryl-undecaprenol N-acetylglucosamine transferase, GT28 family | 2.4.1.227 | GT28          | <i>murG</i>  |
| PHEL49_2450 | glycoside hydrolase, GH74 family                                                                                                 |           | GH74          |              |
| PHEL49_2557 | glycosyltransferase, GT83 family                                                                                                 | 2.4.1.-   | GT83          |              |
| PHEL49_2579 | sulfatase, S1-16 family                                                                                                          |           | S1-16         |              |
| PHEL49_2592 | glycosyltransferase, GT4 family                                                                                                  |           | GT4           |              |
| PHEL49_2648 | glycosyltransferase, GT4 family                                                                                                  | 2.4.1.-   | GT4           |              |
| PHEL49_2653 | glycoside hydrolase, GH26 family / putative mannan endo-1,4-beta-mannosidase                                                     |           | GH26          |              |
| PHEL49_2654 | glycosyltransferase, GT2 family                                                                                                  | 2.4.1.-   | GT2           |              |

| <b>Locus</b> | <b>Product</b>                                                                 | <b>EC number</b> | <b>CAZyme family</b> | <b>Gene</b> |
|--------------|--------------------------------------------------------------------------------|------------------|----------------------|-------------|
| PHEL85_63    | carbohydrate esterase, CE14 family                                             |                  | CE14                 |             |
| PHEL85_113   | glycosyltransferase, GT2 family                                                |                  | GT2                  |             |
| PHEL85_119   | lipopolysaccharide core biosynthesis glycosyltransferase WaaE, GT2 family      | 2.4.-.-          | GT2                  | <i>waaE</i> |
| PHEL85_125   | undecaprenyl-phosphate 4-deoxy-4-formamido-L-arabinose transferase, GT2 family | 2.4.2.53         | GT2                  | <i>arnC</i> |
| PHEL85_151   | peptidoglycan-binding LysM domain protein, CBM50 domain                        |                  | CBM50                |             |
| PHEL85_156   | beta-glucosidase A, GH1 family                                                 | 3.2.1.21         | GH1                  | <i>bglA</i> |
| PHEL85_158   | beta-glucosidase B, GH3 family                                                 | 3.2.1.21         | GH3                  | <i>bglB</i> |
| PHEL85_194   | glycosyltransferase, GTnc family                                               |                  | GTnc                 |             |
| PHEL85_205   | sulfatase, S1-29 family                                                        |                  | S1-29                |             |
| PHEL85_234   | carbohydrate esterase, CE14 family                                             |                  | CE14                 |             |

|            |                                                                                                                                                   |                 |              |                  |
|------------|---------------------------------------------------------------------------------------------------------------------------------------------------|-----------------|--------------|------------------|
| PHEL85_265 | glycosyltransferase, GT4 family                                                                                                                   |                 | GT4          |                  |
| PHEL85_269 | glycosyltransferase, GT4 family                                                                                                                   |                 | GT4          |                  |
| PHEL85_270 | glycosyltransferase, GTnc family                                                                                                                  |                 | GTnc         |                  |
| PHEL85_275 | glycosyltransferase, GT2 family                                                                                                                   |                 | GT2          |                  |
| PHEL85_278 | glycosyltransferase, GT2 family                                                                                                                   |                 | GT2          |                  |
| PHEL85_279 | glycosyltransferase, GT4 family                                                                                                                   |                 | GT4          |                  |
| PHEL85_280 | glycosyltransferase, GT4 family                                                                                                                   |                 | GT4          |                  |
| PHEL85_282 | glycosyltransferase, GT4 family                                                                                                                   |                 | GT4          |                  |
| PHEL85_284 | glycosyltransferase, GT4 family                                                                                                                   |                 | GT4          |                  |
| PHEL85_327 | glycoside hydrolase, GH25 family                                                                                                                  |                 | GH25         |                  |
| PHEL85_377 | bifunctional UDP-3-O-[3-hydroxymyristoyl] N-acetylglucosamine deacetylase, CE11 family / (3R)-hydroxymyristoyl-[acyl carrier protein] dehydratase | 3.5.1-/4.2.1.59 | CE11         | <i>lpxC/fabZ</i> |
| PHEL85_431 | peptidoglycan-binding LysM domain protein, CBM50 domain                                                                                           |                 | CBM50 (2x)   |                  |
| PHEL85_502 | beta-hexosaminidase, GH3 family                                                                                                                   | 3.2.1.52        | GH3          | <i>nagZ</i>      |
| PHEL85_559 | N-acetyl-alpha-D-glucosaminyl L-malate synthase, GT4 family                                                                                       |                 | GT4          |                  |
| PHEL85_682 | alginate lyase (endo-gulonate lyase), CBM32 domain, PL7-3 family                                                                                  | 4.2.2.3         | PL7-3, CBM32 | <i>alyA1</i>     |
| PHEL85_701 | glycosyltransferase, GT4 family                                                                                                                   |                 | GT4          |                  |
| PHEL85_722 | glycosyltransferase, GT2 family                                                                                                                   |                 | GT2          |                  |
| PHEL85_727 | sulfatase                                                                                                                                         |                 | S1-nc        |                  |
| PHEL85_750 | murein lytic exotransglycosylase, GH23 family                                                                                                     | 3.2.1.n1        | GH23         | <i>mltD1</i>     |
| PHEL85_822 | endo-1,3(4)-beta-glucanase, CBM6 domain, GH81 family                                                                                              | 3.2.1.39        | GH81, CBM6   |                  |
| PHEL85_866 | response regulator receiver domain / dolichyl-phosphate beta-glycosyltransferase, GT2 family                                                      | 2.4.1.117       | GT2          |                  |
| PHEL85_869 | glycoside hydrolase, GH5 family                                                                                                                   | 3.2.1.-         | GH5          |                  |
| PHEL85_870 | glycosyltransferase, GT4 family                                                                                                                   |                 | GT4          |                  |
| PHEL85_889 | possible glucan exo-1,3-beta-glucosidase, GH17 family                                                                                             | 3.2.1.58        | GH17         | <i>bgl2</i>      |
| PHEL85_891 | glycosylceramidase, GH30-1 family                                                                                                                 | 3.2.1.45        | GH30-1       | <i>gba</i>       |
| PHEL85_892 | glycoside hydrolase, GH17 family                                                                                                                  |                 | GH17         |                  |
| PHEL85_893 | beta-glucosidase, GH3 family                                                                                                                      | 3.2.1.21        | GH3          | <i>bglX1</i>     |
| PHEL85_895 | glycoside hydrolase, GHnc family                                                                                                                  |                 | GHnc         |                  |
| PHEL85_896 | endo-1,3(4)-beta-glucanase, GH16 family                                                                                                           | 3.2.1.6         | GH16         | <i>lamA</i>      |
| PHEL85_897 | carbohydrate binding protein, CBM4 domain                                                                                                         |                 | CBM4 (2x)    |                  |
| PHEL85_902 | alpha-glucosidase, GH97 family                                                                                                                    | 3.2.1.20        | GH97         | <i>susB</i>      |
| PHEL85_903 | maltoXose-producing alpha-amylase, GH13-19 family                                                                                                 | 3.2.1.-         | GH13-19      | <i>amy</i>       |

|             |                                                                                    |                   |               |               |
|-------------|------------------------------------------------------------------------------------|-------------------|---------------|---------------|
| PHEL85_904  | glycoside hydrolase, GH13 family                                                   | 3.2.1.-           | GH13          |               |
| PHEL85_905  | alpha-glucosidase, GH31 family                                                     | 3.2.1.20          | GH31          | <i>malA</i>   |
| PHEL85_906  | putative neopullanase, GH13 family                                                 | 3.2.1.135         | GH13          | <i>susA</i>   |
| PHEL85_907  | maltose phosphorylase, GH65 family                                                 | 2.4.1.8           | GH65          | <i>mapA</i>   |
| PHEL85_915  | glycoside hydrolase, CBM48 domain, GH13 family                                     | 3.2.1.-           | GH13, CBM48   |               |
| PHEL85_921  | glycosyltransferase, GT2 family                                                    |                   | GT2           |               |
| PHEL85_1027 | sulfatase                                                                          |                   | S1-nc         |               |
| PHEL85_1054 | glycoside hydrolase, GHnc family                                                   |                   | GHnc          |               |
| PHEL85_1179 | glycosyltransferase, GT4 family                                                    |                   | GT4           |               |
| PHEL85_1180 | glycosyltransferase, GT4 family                                                    |                   | GT4           |               |
| PHEL85_1189 | beta-N-acetylglucosaminidase, GH3 family / serine peptidase, S12 family            | 3.2.1.52/3.4.21.- | GH3, S12      | <i>bglX2</i>  |
| PHEL85_1263 | FAD-dependent pyridine nucleotide-disulphide oxidoreductase, AA3 family            |                   | AA3           |               |
| PHEL85_1317 | catalase/hydroperoxidase HPI(I)                                                    | 1.11.1.21         | AAnc          | <i>katG</i>   |
| PHEL85_1337 | esterase/lipase/peptidase, CE10 family                                             |                   | CE10          |               |
| PHEL85_1387 | peptidoglycan-binding LysM domain protein, CBM50 domain                            |                   | CBM50         |               |
| PHEL85_1404 | glycosyltransferase, GT2 family                                                    |                   | GT2           |               |
| PHEL85_1406 | glycosyltransferase, GT4 family                                                    |                   | GT4           |               |
| PHEL85_1407 | glycosyltransferase, GT4 family                                                    |                   | GT4           |               |
| PHEL85_1409 | glycosyltransferase, GT4 family                                                    |                   | GT4           |               |
| PHEL85_1411 | glycosyltransferase, GT4 family                                                    |                   | GT4           |               |
| PHEL85_1457 | glycogen synthase, GT4 family                                                      | 2.4.1.21          | GT4           | <i>glgA</i>   |
| PHEL85_1459 | alpha-1,4-glucan:phosphate maltosyltransferase, GH13-3 family                      | 2.4.1.-           | GH13-3        | <i>glgE</i>   |
| PHEL85_1461 | 1,4-alpha-glucan (glycogen) branching enzyme, CBM48 domain, GH-13-9 family         | 2.4.1.18          | GH13-9, CBM48 | <i>glgB</i>   |
| PHEL85_1462 | alpha-glucosidase 2, GH31 family                                                   | 3.2.1.20          | GH31          |               |
| PHEL85_1511 | glycosyltransferase, GTnc family                                                   |                   | GTnc          |               |
| PHEL85_1558 | BACON domain-containing alginate lyase, PL7-5 family                               | 4.2.2.3           | PL7-5         |               |
| PHEL85_1563 | alginate lyase, PL6-1 family                                                       | 4.2.2.3           | PL6-1         | <i>alyA6</i>  |
| PHEL85_1567 | alginate lyase (exo-oligoguluronate lyase), PL7-5 family                           | 4.2.2.3           | PL7-5         | <i>alyA5b</i> |
| PHEL85_1570 | alginate lyase (exo-oligoguluronate lyase), PL7-5 family                           | 4.2.2.3           | PL7-5         | <i>alyA5a</i> |
| PHEL85_1575 | alginate lyase, PL6-1 family                                                       | 4.2.2.3           | PL6-1         | <i>alyA4a</i> |
| PHEL85_1577 | alginate lyase, PL17-2 family                                                      | 4.2.2.3           | PL17-2        | <i>alyA3</i>  |
| PHEL85_1594 | alginate lyase domain protein                                                      | 4.2.2.3           | PLnc          |               |
| PHEL85_1807 | 3-deoxy-D-manno-octulosonic-acid transferase, GT30 family                          | 2.-.-.-           | GT30          | <i>kdtA</i>   |
| PHEL85_1821 | putative lipopolysaccharide core biosynthesis mannosyltransferase LpsB, GT4 family |                   | GT4           | <i>lpsB</i>   |

|             |                                                                                                                                                                |                   |                    |              |
|-------------|----------------------------------------------------------------------------------------------------------------------------------------------------------------|-------------------|--------------------|--------------|
| PHEL85_1864 | glycosyltransferase, GTnc family                                                                                                                               |                   | GTnc               |              |
| PHEL85_1866 | putative rhamnosyltransferase, GT2 family                                                                                                                      | 2.4.1.-           | GT2                | <i>wbbL</i>  |
| PHEL85_1867 | putative glycosyltransferase                                                                                                                                   |                   |                    |              |
| PHEL85_1868 | glycosyltransferase, GT4 family                                                                                                                                |                   | GT4                |              |
| PHEL85_1875 | putative glycosyltransferase, GTnc family                                                                                                                      |                   | GTnc               |              |
| PHEL85_1936 | murein lytic exotransglycosylase, CBM50 domain, GH23 family                                                                                                    | 3.2.1.n1          | GH23 and CBM50(2x) | <i>mltD2</i> |
| PHEL85_1941 | peptidoglycan glycosyltransferase, GT51 family / penicillin binding protein 1A (penicillin-insensitive transglycosylase / penicillin-sensitive transpeptidase) | 2.4.1.129/3.4.-.- | GT51               | <i>mrcA</i>  |
| PHEL85_1983 | sulfatase, S1-16 family                                                                                                                                        |                   | S1-16              |              |
| PHEL85_1985 | sulfatase, S1-16 family                                                                                                                                        |                   | S1-16              |              |
| PHEL85_1986 | sulfatase, S1-25 family                                                                                                                                        |                   | S1-25              |              |
| PHEL85_1987 | alpha-L-fucosidase, GH95 family                                                                                                                                | 3.2.1.51          | GH95               | <i>afcA1</i> |
| PHEL85_1988 | sulfatase, S1-15 family                                                                                                                                        |                   | S1-15              |              |
| PHEL85_1989 | polysaccharide lyase, PL1 family                                                                                                                               |                   | PL1                |              |
| PHEL85_1990 | glycoside hydrolase, GH43 family                                                                                                                               |                   | GH43               |              |
| PHEL85_1992 | glycoside hydrolase, GHnc family                                                                                                                               |                   | GHnc               |              |
| PHEL85_1994 | sulfatase, S1-15 family                                                                                                                                        |                   | S1-15              |              |
| PHEL85_1996 | sulfatase, S1-16 family                                                                                                                                        |                   | S1-16              |              |
| PHEL85_1997 | sulfatase, S1-15 family                                                                                                                                        |                   | S1-15              |              |
| PHEL85_1998 | sulfatase, S1-15 family                                                                                                                                        |                   | S1-15              |              |
| PHEL85_1999 | alpha-L-fucosidase, GH29 family                                                                                                                                | 3.2.1.51          | GH29               | <i>alfA1</i> |
| PHEL85_2001 | sulfatase, S1-17 family                                                                                                                                        |                   | S1-17              |              |
| PHEL85_2002 | sulfatase, S1-16 family                                                                                                                                        |                   | S1-16              |              |
| PHEL85_2003 | sulfatase, S1-16 family                                                                                                                                        |                   | S1-16              |              |
| PHEL85_2005 | alpha-L-fucosidase, GH29 family                                                                                                                                | 3.2.1.51          | GH29               | <i>fucA</i>  |
| PHEL85_2007 | alpha-L-fucosidase, GH29 family                                                                                                                                | 3.2.1.51          | GH29               | <i>alfA4</i> |
| PHEL85_2009 | sulfatase S1-15 family                                                                                                                                         |                   | S1-15              |              |
| PHEL85_2010 | sulfatase S1-22 family                                                                                                                                         |                   | S1-22              |              |
| PHEL85_2011 | sulfatase, S1-17 family                                                                                                                                        |                   | S1-17              |              |
| PHEL85_2055 | uncharacterized protein YgaU, CBM50 domain                                                                                                                     |                   | CBM50              | <i>ygaU</i>  |
| PHEL85_2080 | unsaturated glucuronyl hydrolase, GH88 family                                                                                                                  | 3.2.1.-           | GH88               | <i>uglA1</i> |
| PHEL85_2081 | glycosyl hydrolase, GH117 family                                                                                                                               |                   | GH117              |              |
| PHEL85_2083 | carbohydrate esterase, CE1 family                                                                                                                              | 3.1.1.-           | CE1                |              |

|             |                                                                                                                                                     |           |             |              |
|-------------|-----------------------------------------------------------------------------------------------------------------------------------------------------|-----------|-------------|--------------|
| PHEL85_2084 | conserved hypothetical protein containing chondroitin AC / alginate lyase domain                                                                    |           |             |              |
| PHEL85_2085 | conserved hypothetical protein containing chondroitin AC / alginate lyase domain, PL12 family                                                       |           | PL12        |              |
| PHEL85_2087 | putative beta-xylosidase, GH30-2 family                                                                                                             |           | GH30-2      |              |
| PHEL85_2088 | alpha-L-fucosidase, GH29 family                                                                                                                     | 3.2.1.51  | GH29        | <i>alfA5</i> |
| PHEL85_2093 | sulfatase, S1-17 family                                                                                                                             |           | S1-17       |              |
| PHEL85_2096 | mucin-desulfating sulfatase (N-acetylglucosamine-6-sulfatase), S1-11 family                                                                         | 3.1.6.14, | S1-11       |              |
| PHEL85_2099 | alpha-L-fucosidase, GH29 family                                                                                                                     | 3.2.1.51  | GH95        | <i>afcA2</i> |
| PHEL85_2100 | sulfatase, S1-25 family                                                                                                                             |           | S1-25       |              |
| PHEL85_2102 | sulfatase, S1-17 family                                                                                                                             |           | S1-17       |              |
| PHEL85_2104 | putative polysaccharide lyase, PLnc family                                                                                                          |           | PLnc        |              |
| PHEL85_2105 | beta-xylosidase, CBM35 domain, GH43 family                                                                                                          | 3.2.1.37  | GH43, CBM35 | <i>xyfB</i>  |
| PHEL85_2106 | beta-xylosidase, GH120 family                                                                                                                       | 3.2.1.-   | GH120       |              |
| PHEL85_2108 | sulfatase, S1-15 family                                                                                                                             |           | S1-15       |              |
| PHEL85_2111 | polysaccharide lyase, PLnc family                                                                                                                   |           | PLnc        |              |
| PHEL85_2112 | polysaccharide lyase, PL17 family                                                                                                                   |           | PL17        |              |
| PHEL85_2113 | sulfatase, S1-28 family                                                                                                                             |           | S1-28       |              |
| PHEL85_2114 | beta-xylosidase, GH39 family                                                                                                                        | 3.2.1.37  | GH39        | <i>xynB</i>  |
| PHEL85_2115 | sulfatase, S1-23 family                                                                                                                             |           | S1-23       |              |
| PHEL85_2231 | carbohydrate esterase, CE1 family                                                                                                                   | 3.1.1.-   | CE1         |              |
| PHEL85_2370 | BNR repeat-containing glycosyde hydrolase, GHnc family                                                                                              |           | GHnc        |              |
| PHEL85_2396 | polyprenol phosphate mannose synthase, GT2 family                                                                                                   | 2.4.1.-   | GT2         | <i>ppmA</i>  |
| PHEL85_2406 | glycogen synthase-like protein, GT5 family                                                                                                          | 2.4.1.-   | GT5         |              |
| PHEL85_2455 | glycoside hydrolase, GHnc family                                                                                                                    |           | GHnc        |              |
| PHEL85_2525 | glycosyltransferase, GT4 family                                                                                                                     | 2.4.1.-   | GT4         |              |
| PHEL85_2540 | polysaccharide lyase, BACON domain, PL6-2 family                                                                                                    |           | PL6-2       |              |
| PHEL85_2584 | glycosyltransferase, GT4 family                                                                                                                     | 2.4.1.-   | GT4         |              |
| PHEL85_2585 | putative slime polysaccharide biosynthesis glycosyl transferase, GT2 family                                                                         |           | GT2         |              |
| PHEL85_2625 | glycoside hydrolase, GH74 family                                                                                                                    |           | GH74        |              |
| PHEL85_2690 | carbohydrate binding protein, CBMnc family                                                                                                          |           | CBMnc       |              |
| PHEL85_2738 | glycosyltransferase, GT83 family                                                                                                                    | 2.4.1.-   | GT83        |              |
| PHEL85_2813 | undecaprenyl-phosphate-N-acetylglucosamine-N- acetylmuramyl-(pentapeptide) pyrophosphoryl-undecaprenol N-acetylglucosamine transferase, GT28 family | 2.4.1.227 | GT28        | <i>murG</i>  |
| PHEL85_2851 | glycoside hydrolase, GH113 family                                                                                                                   | 3.2.1.-   | GH113       |              |



|             |                                                                       |                 |              |               |
|-------------|-----------------------------------------------------------------------|-----------------|--------------|---------------|
| PHEL85_2856 | glycosyltransferase, GT2 family                                       | 2.4.1.-         | GT2          |               |
| PHEL85_2857 | glycosyltransferase, GT2 family                                       | 2.4.1.-         | GT2          |               |
| PHEL85_2861 | endo-beta-N-acetylglucosaminidase, CBM50 domain, GH73 family          | 3.2.1.-         | GH73, CBM50  |               |
| PHEL85_2928 | alginate lyase 2, CBM32 domain, PL7-3 family                          | 4.2.2.3         | PL7-3, CBM32 | <i>alyA2</i>  |
| PHEL85_3026 | carbohydrate binding protein, CBM48 domain                            |                 | CBM48        |               |
| PHEL85_3112 | alginate lyase, PL6-1 family                                          | 4.2.2.3         | PL6-1        | <i>alyA4b</i> |
| PHEL85_3115 | putative beta-glucuronidase, GH2 family                               | 3.2.1.31        | GH2          |               |
| PHEL85_3127 | lipid-A-disaccharide synthase, GT19 family                            | 2.4.1.182       | GT19         | <i>lpxB</i>   |
| PHEL85_3137 | sulfatase, S1-20 family                                               |                 | S1-20        |               |
| PHEL85_3139 | sulfatase, S1-16 family                                               |                 | S1-16        |               |
| PHEL85_3144 | glycoside hydrolase, GH117 family                                     |                 | GH117        |               |
| PHEL85_3146 | glycoside hydrolase, GH30 family                                      |                 | GH30         |               |
| PHEL85_3148 | sulfatase, S1-23 family                                               |                 | S1-23        |               |
| PHEL85_3149 | alpha-L-fucosidase, GH95 family                                       | 3.2.1.51        | GH95         | <i>afcA4</i>  |
| PHEL85_3150 | carbohydrate esterase, CE1 family / glycoside hydrolase, GH117 family | 3.1.1.-/3.2.1.- | CE1, GH117   |               |
| PHEL85_3151 | sialate O-acetylerase, CBM17 domain, CE6 family                       |                 | CBM6, CE6    |               |
| PHEL85_3152 | glycoside hydrolase, GH117 family                                     |                 | GH117        |               |
| PHEL85_3153 | probable lipase/esterase, CE10 family                                 |                 | CE6          |               |
| PHEL85_3154 | sialic acid-specific 9-O-acetylerase, CE6 family                      |                 | CE10         |               |
| PHEL85_3155 | glycoside hydrolase, GH117 family                                     |                 | GH117        |               |
| PHEL85_3156 | N-sulfoglucosamine sulfohydrolase, S1-8 family                        | 3.10.1.1        | S1-8         |               |
| PHEL85_3158 | sulfatase, S1-16 family                                               |                 | S1-16        |               |
| PHEL85_3159 | alpha-glucosidase, GH97 family                                        | 3.2.1.20        | GH97         |               |
| PHEL85_3160 | sulfatase, S1-15 family                                               |                 | S1-15        |               |
| PHEL85_3162 | carbohydrate binding protein, CBM47 domain                            |                 | CBM47        |               |
| PHEL85_3163 | carbohydrate binding protein, CBM47 domain                            |                 | CBM47        |               |
| PHEL85_3164 | glycoside hydrolase, GH128 family                                     |                 | GH128        |               |
| PHEL85_3165 | glycoside hydrolase, GH128 family                                     |                 | GH128        |               |
| PHEL85_3166 | glycoside hydrolase, GH128 family                                     |                 | GH128        |               |
| PHEL85_3167 | probable lipase/esterase, CE10 family                                 |                 | CE10         |               |
| PHEL85_3168 | alpha/beta hydrolase family protein, CE10 family                      |                 | CE10         |               |
| PHEL85_3169 | sulfatase, S1-15                                                      |                 | S1-15        |               |
| PHEL85_3170 | beta-galactosidase, CBM35 domain, GH2 family                          | 3.2.1.23        | GH2, CBM35   | <i>bgaE</i>   |
| PHEL85_3176 | beta-galactosidase, GH2 family                                        | 3.2.1.23        | GH2          | <i>lacZ</i>   |

|             |                                                                    |          |       |             |
|-------------|--------------------------------------------------------------------|----------|-------|-------------|
| PHEL85_3177 | sulfatase, S1-19 family                                            |          | S1-19 |             |
| PHEL85_3178 | alpha-L-arabinofuranosidase, GH43 family                           | 3.2.1.55 | GH43  |             |
| PHEL85_3203 | glycosyltransferase, GT2 family                                    |          | GT2   |             |
| PHEL85_3212 | beta-galactosidase, GH2 family                                     | 3.2.1.23 | GH2   | <i>bgaB</i> |
| PHEL85_3213 | carbohydrate binding protein, CBMnc family                         |          | CBMnc |             |
| PHEL85_3297 | putative peptidoglycan N-acetylglucosamine deacetylase, CE4 family | 3.5.1.-  | CE4   | <i>pgdA</i> |
| PHEL85_3301 | sulfatase                                                          |          | S1-nc |             |
| PHEL85_3398 | glycosyltransferase, GT4 family                                    | 2.4.1.-  | GT4   |             |
| PHEL85_3412 | glycosyltransferase, GT2 family                                    |          | GT2   |             |

---
