# Supplementary material
Source: PubMed Central journal article supplement (PMC4438327)
Supplement: ismej2014225x5.pdf [file ismej2014225x5.pdf]

**Supplementary Table S3** Reference *Flavobacteriaceae* and their peptidase and CAZyme gene frequencies according to automated annotation.

|                                               | PMID for sequence    | NCBI taxonomy ID | genome size [bp] | Sulfatase | Bac_rhodopsin |
|-----------------------------------------------|----------------------|------------------|------------------|-----------|---------------|
| <i>Cellulophaga algicola</i> IC166(T)         | 21475589             | 688270           | 4888353          | 22        | 0             |
| <i>Cellulophaga lytica</i> LIM-21(T)          | 21677859             | 867900           | 3765936          | 15        | 0             |
| <i>Croceibacter atlanticus</i> HTCC2559(T)    | 20639333             | 216432           | 2952962          | 0         | 0             |
| <i>Dokdonia donghaensis</i> MED134            | 22003006             | 313590           | 3301953          | 1         | 1             |
| <i>Dokdonia</i> sp. 4H-3-7-5                  | 21725025             | 983548           | 3389993          | 0         | 1             |
| <i>Flavobacteriaceae bacterium</i> S85        | 21994933             | 1042376          | 3384629          | 58        | 0             |
| <i>Flavobacterium johnsoniae</i> UW101(T)     | 19717629             | 376686           | 6096872          | 12        | 0             |
| <i>Formosa agariphila</i> KMM 3901(T)         | 23995932             | 1347342          | 4207825          | 45        | 0             |
| <i>Gillisia limnaea</i> R-8282(T)             | 23450183             | 865937           | 3966857          | 0         | 2             |
| <i>Gillisia</i> sp. CBA3202                   | 22740667             | 1167637          | 2981404          | 2         | 0             |
| <i>Gramella forsetii</i> ' KT0803             | 17107561             | 411154           | 3798465          | 3         | 0             |
| <i>Imtechella halotolerans</i> K1(T)          | 22740661             | 946077           | 3086951          | 7         | 0             |
| <i>Joostella marina</i> En5(T)                | 23961310             | 926559           | 4508243          | 21        | 0             |
| <i>Kordia algicida</i> OT-1(T)                | 21622754             | 391587           | 5019836          | 2         | 0             |
| <i>Leeuwenhoekiella blandensis</i> MED217(T)  | 16825617             | 398720           | 4238065          | 6         | 0             |
| <i>Maribacter</i> sp. HTCC2170                | 21037013             | 313603           | 4775040          | 25        | 0             |
| <i>Mesoflavibacter zeaxanthinifaciens</i> S86 | 21914876             | 1004149          | 3704661          | 4         | 1             |
| <i>Muricauda ruestringensis</i> B1(T)         | 22768362             | 886377           | 3842422          | 3         | 0             |
| <i>Polaribacter irgensii</i> 23-P(T)          | 9542092 (isolation)  | 313594           | 2745458          | 2         | 1             |
| <i>Polaribacter</i> sp. Hel1_33_49            | this publication     | 1336803          | 3012752          | 12        | 1             |
| <i>Polaribacter</i> sp. Hel1_85               | this publication     | 1250005          | 3914068          | 33        | 0             |
| <i>Polaribacter</i> sp. MED152                | 18552178             | 313598           | 2961474          | 3         | 1             |
| <i>Psychroflexus gondwanensis</i> ACAM 44(T)  | 24391155             | 1189619          | 3311768          | 1         | 1             |
| <i>Psychroflexus torquis</i> 651(T)           | 24391155             | 313595           | 4321832          | 1         | 1             |
| <i>Robiginitalea biformata</i> HTCC2501(T)    | 19767438             | 313596           | 3530383          | 10        | 0             |
| <i>Zobellia galactanivorans</i> Dsij(T)       | 11411725 (isolation) | 63186            | 5521712          | 75        | 0             |
| <i>Zunogwangia profunda</i> SM-A87(T)         | 20398413             | 655815           | 5128187          | 7         | 0             |

|                                               | Mannitol_dh | $\Sigma$ peptidases | $\Sigma$ CAZymes | A08 | A31 | C01 | C10 |
|-----------------------------------------------|-------------|---------------------|------------------|-----|-----|-----|-----|
| <i>Cellulophaga algicola</i> IC166(T)         | 3           | 195                 | 159              | 2   | 0   | 0   | 0   |
| <i>Cellulophaga lytica</i> LIM-21(T)          | 2           | 164                 | 116              | 1   | 0   | 1   | 0   |
| <i>Croceibacter atlanticus</i> HTCC2559(T)    | 0           | 168                 | 91               | 1   | 0   | 1   | 0   |
| <i>Dokdonia donghaensis</i> MED134            | 0           | 188                 | 101              | 1   | 0   | 2   | 0   |
| <i>Dokdonia</i> sp. 4H-3-7-5                  | 0           | 177                 | 40               | 1   | 0   | 1   | 0   |
| <i>Flavobacteriaceae bacterium</i> S85        | 1           | 97                  | 196              | 1   | 0   | 0   | 0   |
| <i>Flavobacterium johnsoniae</i> UW101(T)     | 1           | 189                 | 287              | 1   | 0   | 1   | 0   |
| <i>Formosa agariphila</i> KMM 3901(T)         | 2           | 178                 | 212              | 2   | 0   | 1   | 0   |
| <i>Gillisia limnaea</i> R-8282(T)             | 0           | 202                 | 149              | 1   | 0   | 0   | 0   |
| <i>Gillisia</i> sp. CBA3202                   | 0           | 152                 | 102              | 1   | 0   | 0   | 0   |
| <i>Gramella forsetii</i> ' KT0803             | 1           | 185                 | 144              | 2   | 0   | 0   | 0   |
| <i>Imtechella halotolerans</i> K1(T)          | 0           | 169                 | 93               | 1   | 0   | 0   | 0   |
| <i>Joostella marina</i> En5(T)                | 2           | 185                 | 141              | 3   | 0   | 0   | 0   |
| <i>Kordia algicida</i> OT-1(T)                | 0           | 230                 | 126              | 2   | 0   | 2   | 0   |
| <i>Leeuwenhoekiella blandensis</i> MED217(T)  | 1           | 204                 | 199              | 2   | 0   | 0   | 0   |
| <i>Maribacter</i> sp. HTCC2170                | 1           | 223                 | 139              | 2   | 0   | 0   | 0   |
| <i>Mesoflavibacter zeaxanthinifaciens</i> S86 | 1           | 252                 | 158              | 3   | 0   | 0   | 0   |
| <i>Muricauda ruestringensis</i> B1(T)         | 0           | 211                 | 98               | 1   | 0   | 0   | 0   |
| <i>Polaribacter irgensii</i> 23-P(T)          | 0           | 162                 | 54               | 1   | 0   | 0   | 0   |
| <i>Polaribacter</i> sp. Hel1_33_49            | 0           | 168                 | 104              | 1   | 0   | 1   | 0   |
| <i>Polaribacter</i> sp. Hel1_85               | 1           | 161                 | 140              | 1   | 0   | 0   | 0   |
| <i>Polaribacter</i> sp. MED152                | 0           | 167                 | 91               | 1   | 0   | 0   | 0   |
| <i>Psychroflexus gondwanensis</i> ACAM 44(T)  | 0           | 163                 | 84               | 1   | 0   | 0   | 0   |
| <i>Psychroflexus torquis</i> 651(T)           | 0           | 220                 | 88               | 1   | 0   | 0   | 0   |
| <i>Robiginitalea biformata</i> HTCC2501(T)    | 0           | 217                 | 107              | 1   | 1   | 0   | 0   |
| <i>Zobellia galactanivorans</i> Dsij(T)       | 2           | 198                 | 264              | 1   | 1   | 0   | 0   |
| <i>Zunogwangia profunda</i> SM-A87(T)         | 1           | 224                 | 231              | 2   | 0   | 1   | 0   |

|                                               | C11 | C14 | C25 | C26 | C39 | C40 | C44 |
|-----------------------------------------------|-----|-----|-----|-----|-----|-----|-----|
| <i>Cellulophaga algicola</i> IC166(T)         | 0   | 0   | 0   | 8   | 0   | 5   | 4   |
| <i>Cellulophaga lytica</i> LIM-21(T)          | 0   | 0   | 0   | 8   | 0   | 4   | 5   |
| <i>Croceibacter atlanticus</i> HTCC2559(T)    | 0   | 0   | 1   | 8   | 0   | 3   | 4   |
| <i>Dokdonia donghaensis</i> MED134            | 0   | 0   | 1   | 8   | 0   | 3   | 4   |
| <i>Dokdonia</i> sp. 4H-3-7-5                  | 0   | 0   | 1   | 8   | 0   | 2   | 4   |
| <i>Flavobacteriaceae bacterium</i> S85        | 0   | 0   | 1   | 8   | 1   | 1   | 3   |
| <i>Flavobacterium johnsoniae</i> UW101(T)     | 0   | 0   | 1   | 9   | 0   | 3   | 4   |
| <i>Formosa agariphila</i> KMM 3901(T)         | 0   | 0   | 1   | 8   | 0   | 3   | 4   |
| <i>Gillisia limnaea</i> R-8282(T)             | 0   | 0   | 0   | 8   | 1   | 3   | 7   |
| <i>Gillisia</i> sp. CBA3202                   | 0   | 0   | 0   | 7   | 0   | 3   | 2   |
| <i>Gramella forsetii</i> ' KT0803             | 0   | 0   | 0   | 8   | 0   | 3   | 6   |
| <i>Imtechella halotolerans</i> K1(T)          | 0   | 0   | 0   | 8   | 0   | 2   | 4   |
| <i>Joostella marina</i> En5(T)                | 0   | 1   | 0   | 8   | 0   | 3   | 4   |
| <i>Kordia algicida</i> OT-1(T)                | 0   | 1   | 1   | 8   | 5   | 2   | 5   |
| <i>Leeuwenhoekiella blandensis</i> MED217(T)  | 0   | 4   | 1   | 8   | 0   | 2   | 4   |
| <i>Maribacter</i> sp. HTCC2170                | 0   | 0   | 0   | 9   | 0   | 5   | 4   |
| <i>Mesoflavibacter zeaxanthinifaciens</i> S86 | 0   | 0   | 0   | 11  | 0   | 3   | 6   |
| <i>Muricauda ruestringensis</i> B1(T)         | 0   | 0   | 0   | 8   | 1   | 6   | 4   |
| <i>Polaribacter irgensii</i> 23-P(T)          | 0   | 0   | 1   | 8   | 0   | 2   | 3   |
| <i>Polaribacter</i> sp. Hel1_33_49            | 0   | 1   | 1   | 8   | 0   | 4   | 3   |
| <i>Polaribacter</i> sp. Hel1_85               | 0   | 0   | 1   | 4   | 0   | 3   | 3   |
| <i>Polaribacter</i> sp. MED152                | 0   | 1   | 1   | 8   | 0   | 3   | 4   |
| <i>Psychroflexus gondwanensis</i> ACAM 44(T)  | 0   | 0   | 1   | 8   | 0   | 2   | 5   |
| <i>Psychroflexus torquis</i> 651(T)           | 0   | 5   | 1   | 8   | 0   | 2   | 5   |
| <i>Robiginitalea biformata</i> HTCC2501(T)    | 0   | 1   | 0   | 8   | 0   | 4   | 4   |
| <i>Zobellia galactanivorans</i> Dsij(T)       | 0   | 0   | 0   | 8   | 0   | 5   | 6   |
| <i>Zunogwangia profunda</i> SM-A87(T)         | 1   | 0   | 0   | 8   | 1   | 3   | 5   |

|                                               | C45 | C51 | C56 | C59 | C66 | C82 | M01 |
|-----------------------------------------------|-----|-----|-----|-----|-----|-----|-----|
| <i>Cellulophaga algicola</i> IC166(T)         | 0   | 1   | 5   | 0   | 0   | 0   | 5   |
| <i>Cellulophaga lytica</i> LIM-21(T)          | 0   | 1   | 4   | 0   | 0   | 0   | 6   |
| <i>Croceibacter atlanticus</i> HTCC2559(T)    | 2   | 0   | 4   | 0   | 0   | 0   | 4   |
| <i>Dokdonia donghaensis</i> MED134            | 0   | 0   | 6   | 0   | 0   | 0   | 6   |
| <i>Dokdonia</i> sp. 4H-3-7-5                  | 0   | 0   | 4   | 0   | 0   | 0   | 5   |
| <i>Flavobacteriaceae bacterium</i> S85        | 0   | 0   | 2   | 0   | 0   | 0   | 4   |
| <i>Flavobacterium johnsoniae</i> UW101(T)     | 0   | 0   | 4   | 0   | 0   | 1   | 6   |
| <i>Formosa agariphila</i> KMM 3901(T)         | 0   | 0   | 7   | 0   | 0   | 0   | 5   |
| <i>Gillisia limnaea</i> R-8282(T)             | 1   | 0   | 5   | 0   | 0   | 1   | 6   |
| <i>Gillisia</i> sp. CBA3202                   | 1   | 0   | 2   | 0   | 0   | 1   | 5   |
| <i>Gramella forsetii</i> ' KT0803             | 2   | 0   | 6   | 0   | 0   | 1   | 4   |
| <i>Imtechella halotolerans</i> K1(T)          | 0   | 0   | 2   | 0   | 0   | 0   | 2   |
| <i>Joostella marina</i> En5(T)                | 0   | 0   | 4   | 0   | 0   | 0   | 6   |
| <i>Kordia algicida</i> OT-1(T)                | 0   | 1   | 3   | 0   | 0   | 1   | 6   |
| <i>Leeuwenhoekiella blandensis</i> MED217(T)  | 0   | 0   | 3   | 0   | 0   | 0   | 7   |
| <i>Maribacter</i> sp. HTCC2170                | 0   | 0   | 3   | 0   | 0   | 0   | 5   |
| <i>Mesoflavibacter zeaxanthinifaciens</i> S86 | 0   | 0   | 7   | 0   | 0   | 0   | 9   |
| <i>Muricauda ruestringensis</i> B1(T)         | 2   | 0   | 5   | 0   | 0   | 0   | 6   |
| <i>Polaribacter irgensii</i> 23-P(T)          | 0   | 0   | 2   | 0   | 0   | 0   | 6   |
| <i>Polaribacter</i> sp. Hel1_33_49            | 0   | 0   | 4   | 0   | 0   | 0   | 6   |
| <i>Polaribacter</i> sp. Hel1_85               | 0   | 0   | 2   | 0   | 0   | 0   | 6   |
| <i>Polaribacter</i> sp. MED152                | 0   | 0   | 2   | 0   | 0   | 0   | 8   |
| <i>Psychroflexus gondwanensis</i> ACAM 44(T)  | 1   | 0   | 2   | 0   | 0   | 0   | 6   |
| <i>Psychroflexus torquis</i> 651(T)           | 0   | 0   | 2   | 0   | 0   | 0   | 8   |
| <i>Robiginitalea biformata</i> HTCC2501(T)    | 0   | 0   | 4   | 0   | 0   | 0   | 5   |
| <i>Zobellia galactanivorans</i> Dsij(T)       | 1   | 0   | 6   | 0   | 0   | 0   | 7   |
| <i>Zunogwangia profunda</i> SM-A87(T)         | 1   | 0   | 4   | 0   | 0   | 1   | 8   |

|                                               | M03 | M04 | M08 | M10 | M12 | M13 | M14 |
|-----------------------------------------------|-----|-----|-----|-----|-----|-----|-----|
| <i>Cellulophaga algicola</i> IC166(T)         | 2   | 2   | 0   | 0   | 2   | 1   | 6   |
| <i>Cellulophaga lytica</i> LIM-21(T)          | 2   | 0   | 0   | 0   | 0   | 1   | 5   |
| <i>Croceibacter atlanticus</i> HTCC2559(T)    | 1   | 4   | 0   | 0   | 2   | 1   | 5   |
| <i>Dokdonia donghaensis</i> MED134            | 1   | 0   | 0   | 0   | 0   | 2   | 8   |
| <i>Dokdonia</i> sp. 4H-3-7-5                  | 1   | 0   | 0   | 0   | 1   | 2   | 9   |
| <i>Flavobacteriaceae bacterium</i> S85        | 1   | 0   | 0   | 0   | 0   | 1   | 1   |
| <i>Flavobacterium johnsoniae</i> UW101(T)     | 2   | 0   | 0   | 0   | 4   | 2   | 4   |
| <i>Formosa agariphila</i> KMM 3901(T)         | 2   | 1   | 0   | 0   | 1   | 1   | 4   |
| <i>Gillisia limnaea</i> R-8282(T)             | 2   | 0   | 0   | 0   | 1   | 1   | 8   |
| <i>Gillisia</i> sp. CBA3202                   | 2   | 0   | 0   | 0   | 1   | 1   | 4   |
| <i>Gramella forsetii</i> ' KT0803             | 2   | 0   | 0   | 0   | 2   | 1   | 6   |
| <i>Imtechella halotolerans</i> K1(T)          | 1   | 0   | 0   | 0   | 0   | 0   | 4   |
| <i>Joostella marina</i> En5(T)                | 1   | 0   | 0   | 0   | 1   | 1   | 4   |
| <i>Kordia algicida</i> OT-1(T)                | 2   | 2   | 0   | 0   | 4   | 1   | 5   |
| <i>Leeuwenhoekiella blandensis</i> MED217(T)  | 1   | 0   | 0   | 0   | 0   | 0   | 5   |
| <i>Maribacter</i> sp. HTCC2170                | 1   | 0   | 0   | 0   | 1   | 0   | 7   |
| <i>Mesoflavibacter zeaxanthinifaciens</i> S86 | 2   | 0   | 1   | 0   | 1   | 0   | 8   |
| <i>Muricauda ruestringensis</i> B1(T)         | 1   | 0   | 0   | 0   | 1   | 0   | 6   |
| <i>Polaribacter irgensii</i> 23-P(T)          | 1   | 0   | 0   | 0   | 1   | 1   | 5   |
| <i>Polaribacter</i> sp. Hel1_33_49            | 1   | 0   | 0   | 0   | 1   | 1   | 6   |
| <i>Polaribacter</i> sp. Hel1_85               | 1   | 0   | 0   | 0   | 0   | 0   | 5   |
| <i>Polaribacter</i> sp. MED152                | 2   | 0   | 0   | 0   | 1   | 0   | 4   |
| <i>Psychroflexus gondwanensis</i> ACAM 44(T)  | 2   | 0   | 0   | 0   | 2   | 1   | 7   |
| <i>Psychroflexus torquis</i> 651(T)           | 2   | 0   | 0   | 0   | 3   | 2   | 7   |
| <i>Robiginitalea biformata</i> HTCC2501(T)    | 1   | 0   | 0   | 0   | 1   | 0   | 7   |
| <i>Zobellia galactanivorans</i> Dsij(T)       | 1   | 2   | 0   | 0   | 2   | 0   | 5   |
| <i>Zunogwangia profunda</i> SM-A87(T)         | 2   | 0   | 0   | 0   | 0   | 2   | 5   |

|                                               | M15 | M16 | M17 | M18 | M19 | M20 | M22 |
|-----------------------------------------------|-----|-----|-----|-----|-----|-----|-----|
| <i>Cellulophaga algicola</i> IC166(T)         | 2   | 8   | 0   | 0   | 1   | 8   | 4   |
| <i>Cellulophaga lytica</i> LIM-21(T)          | 2   | 6   | 0   | 0   | 0   | 5   | 4   |
| <i>Croceibacter atlanticus</i> HTCC2559(T)    | 2   | 6   | 0   | 0   | 1   | 3   | 4   |
| <i>Dokdonia donghaensis</i> MED134            | 2   | 7   | 0   | 0   | 1   | 9   | 4   |
| <i>Dokdonia</i> sp. 4H-3-7-5                  | 2   | 7   | 0   | 0   | 1   | 9   | 4   |
| <i>Flavobacteriaceae bacterium</i> S85        | 0   | 3   | 0   | 0   | 0   | 4   | 4   |
| <i>Flavobacterium johnsoniae</i> UW101(T)     | 2   | 3   | 0   | 0   | 1   | 5   | 4   |
| <i>Formosa agariphila</i> KMM 3901(T)         | 2   | 4   | 0   | 0   | 0   | 5   | 4   |
| <i>Gillisia limnaea</i> R-8282(T)             | 1   | 10  | 0   | 0   | 1   | 6   | 4   |
| <i>Gillisia</i> sp. CBA3202                   | 0   | 9   | 0   | 0   | 1   | 5   | 4   |
| <i>Gramella forsetii</i> ' KT0803             | 1   | 8   | 0   | 0   | 1   | 5   | 4   |
| <i>Imtechella halotolerans</i> K1(T)          | 2   | 13  | 0   | 0   | 1   | 5   | 4   |
| <i>Joostella marina</i> En5(T)                | 2   | 5   | 0   | 0   | 2   | 7   | 4   |
| <i>Kordia algicida</i> OT-1(T)                | 2   | 6   | 0   | 0   | 0   | 7   | 4   |
| <i>Leeuwenhoekiella blandensis</i> MED217(T)  | 2   | 6   | 0   | 0   | 1   | 8   | 4   |
| <i>Maribacter</i> sp. HTCC2170                | 2   | 4   | 0   | 0   | 2   | 12  | 4   |
| <i>Mesoflavibacter zeaxanthinifaciens</i> S86 | 2   | 8   | 0   | 0   | 1   | 11  | 5   |
| <i>Muricauda ruestringensis</i> B1(T)         | 2   | 4   | 0   | 0   | 2   | 11  | 4   |
| <i>Polaribacter irgensii</i> 23-P(T)          | 1   | 5   | 0   | 0   | 0   | 6   | 4   |
| <i>Polaribacter</i> sp. Hel1_33_49            | 1   | 4   | 0   | 0   | 0   | 5   | 4   |
| <i>Polaribacter</i> sp. Hel1_85               | 1   | 2   | 0   | 0   | 0   | 7   | 4   |
| <i>Polaribacter</i> sp. MED152                | 2   | 3   | 0   | 0   | 0   | 4   | 4   |
| <i>Psychroflexus gondwanensis</i> ACAM 44(T)  | 1   | 4   | 0   | 0   | 0   | 6   | 5   |
| <i>Psychroflexus torquis</i> 651(T)           | 1   | 4   | 0   | 0   | 0   | 5   | 5   |
| <i>Robiginitalea biformata</i> HTCC2501(T)    | 3   | 8   | 0   | 0   | 2   | 10  | 5   |
| <i>Zobellia galactanivorans</i> Dsij(T)       | 2   | 3   | 0   | 0   | 1   | 7   | 5   |
| <i>Zunogwangia profunda</i> SM-A87(T)         | 1   | 15  | 0   | 0   | 1   | 4   | 4   |

|                                               | M23 | M24 | M26 | M28 | M29 | M36 | M38 |
|-----------------------------------------------|-----|-----|-----|-----|-----|-----|-----|
| <i>Cellulophaga algicola</i> IC166(T)         | 7   | 3   | 0   | 6   | 1   | 0   | 8   |
| <i>Cellulophaga lytica</i> LIM-21(T)          | 6   | 3   | 1   | 7   | 0   | 0   | 7   |
| <i>Croceibacter atlanticus</i> HTCC2559(T)    | 8   | 2   | 0   | 6   | 0   | 7   | 10  |
| <i>Dokdonia donghaensis</i> MED134            | 6   | 4   | 0   | 6   | 0   | 4   | 11  |
| <i>Dokdonia</i> sp. 4H-3-7-5                  | 9   | 4   | 0   | 6   | 0   | 3   | 9   |
| <i>Flavobacteriaceae bacterium</i> S85        | 7   | 3   | 0   | 0   | 0   | 0   | 2   |
| <i>Flavobacterium johnsoniae</i> UW101(T)     | 6   | 2   | 0   | 2   | 0   | 0   | 8   |
| <i>Formosa agariphila</i> KMM 3901(T)         | 7   | 6   | 0   | 4   | 0   | 0   | 8   |
| <i>Gillisia limnaea</i> R-8282(T)             | 7   | 4   | 0   | 7   | 0   | 0   | 13  |
| <i>Gillisia</i> sp. CBA3202                   | 8   | 3   | 0   | 4   | 0   | 0   | 7   |
| <i>Gramella forsetii</i> ' KT0803             | 7   | 4   | 0   | 6   | 0   | 0   | 11  |
| <i>Imtechella halotolerans</i> K1(T)          | 6   | 3   | 0   | 7   | 0   | 0   | 15  |
| <i>Joostella marina</i> En5(T)                | 5   | 3   | 0   | 6   | 0   | 0   | 11  |
| <i>Kordia algicida</i> OT-1(T)                | 12  | 2   | 0   | 6   | 0   | 0   | 13  |
| <i>Leeuwenhoekiella blandensis</i> MED217(T)  | 7   | 5   | 0   | 8   | 0   | 0   | 11  |
| <i>Maribacter</i> sp. HTCC2170                | 8   | 4   | 0   | 6   | 0   | 0   | 14  |
| <i>Mesoflavibacter zeaxanthinifaciens</i> S86 | 11  | 5   | 0   | 6   | 0   | 0   | 17  |
| <i>Muricauda ruestringensis</i> B1(T)         | 5   | 3   | 0   | 8   | 0   | 0   | 17  |
| <i>Polaribacter irgensii</i> 23-P(T)          | 6   | 4   | 0   | 4   | 0   | 0   | 12  |
| <i>Polaribacter</i> sp. Hel1_33_49            | 7   | 6   | 0   | 8   | 0   | 0   | 14  |
| <i>Polaribacter</i> sp. Hel1_85               | 9   | 4   | 0   | 9   | 0   | 0   | 4   |
| <i>Polaribacter</i> sp. MED152                | 7   | 2   | 0   | 5   | 1   | 0   | 7   |
| <i>Psychroflexus gondwanensis</i> ACAM 44(T)  | 6   | 3   | 0   | 5   | 0   | 2   | 11  |
| <i>Psychroflexus torquis</i> 651(T)           | 7   | 4   | 0   | 5   | 0   | 3   | 17  |
| <i>Robiginitalea biformata</i> HTCC2501(T)    | 8   | 3   | 0   | 11  | 0   | 0   | 13  |
| <i>Zobellia galactanivorans</i> Dsij(T)       | 6   | 4   | 0   | 5   | 1   | 0   | 7   |
| <i>Zunogwangia profunda</i> SM-A87(T)         | 8   | 4   | 0   | 7   | 0   | 0   | 11  |

|                                               | M41 | M42 | M43 | M48 | M49 | M50 | M54 |
|-----------------------------------------------|-----|-----|-----|-----|-----|-----|-----|
| <i>Cellulophaga algicola</i> IC166(T)         | 2   | 1   | 0   | 4   | 0   | 2   | 0   |
| <i>Cellulophaga lytica</i> LIM-21(T)          | 1   | 1   | 1   | 3   | 0   | 2   | 0   |
| <i>Croceibacter atlanticus</i> HTCC2559(T)    | 1   | 1   | 2   | 2   | 1   | 1   | 0   |
| <i>Dokdonia donghaensis</i> MED134            | 1   | 1   | 0   | 2   | 1   | 1   | 0   |
| <i>Dokdonia</i> sp. 4H-3-7-5                  | 1   | 1   | 0   | 2   | 1   | 1   | 0   |
| <i>Flavobacteriaceae bacterium</i> S85        | 1   | 1   | 0   | 2   | 0   | 1   | 0   |
| <i>Flavobacterium johnsoniae</i> UW101(T)     | 1   | 1   | 3   | 1   | 0   | 2   | 1   |
| <i>Formosa agariphila</i> KMM 3901(T)         | 1   | 1   | 0   | 2   | 0   | 2   | 0   |
| <i>Gillisia limnaea</i> R-8282(T)             | 1   | 1   | 0   | 3   | 1   | 2   | 0   |
| <i>Gillisia</i> sp. CBA3202                   | 1   | 1   | 1   | 1   | 1   | 2   | 0   |
| <i>Gramella forsetii</i> ' KT0803             | 1   | 1   | 2   | 2   | 1   | 2   | 0   |
| <i>Imtechella halotolerans</i> K1(T)          | 1   | 1   | 1   | 3   | 0   | 2   | 0   |
| <i>Joostella marina</i> En5(T)                | 1   | 1   | 0   | 3   | 0   | 2   | 0   |
| <i>Kordia algicida</i> OT-1(T)                | 2   | 1   | 2   | 3   | 1   | 1   | 0   |
| <i>Leeuwenhoekiella blandensis</i> MED217(T)  | 1   | 1   | 1   | 3   | 0   | 1   | 0   |
| <i>Maribacter</i> sp. HTCC2170                | 1   | 1   | 0   | 3   | 1   | 2   | 0   |
| <i>Mesoflavibacter zeaxanthinifaciens</i> S86 | 2   | 2   | 2   | 4   | 0   | 2   | 0   |
| <i>Muricauda ruestringensis</i> B1(T)         | 1   | 1   | 0   | 3   | 0   | 2   | 0   |
| <i>Polaribacter irgensii</i> 23-P(T)          | 2   | 1   | 0   | 1   | 0   | 2   | 0   |
| <i>Polaribacter</i> sp. Hel1_33_49            | 1   | 1   | 1   | 2   | 0   | 2   | 0   |
| <i>Polaribacter</i> sp. Hel1_85               | 2   | 1   | 2   | 2   | 0   | 1   | 0   |
| <i>Polaribacter</i> sp. MED152                | 1   | 1   | 0   | 2   | 1   | 2   | 0   |
| <i>Psychroflexus gondwanensis</i> ACAM 44(T)  | 2   | 1   | 0   | 2   | 0   | 2   | 0   |
| <i>Psychroflexus torquis</i> 651(T)           | 2   | 1   | 0   | 2   | 0   | 2   | 0   |
| <i>Robiginitalea biformata</i> HTCC2501(T)    | 1   | 1   | 0   | 3   | 0   | 2   | 0   |
| <i>Zobellia galactanivorans</i> Dsij(T)       | 2   | 1   | 0   | 4   | 0   | 3   | 0   |
| <i>Zunogwangia profunda</i> SM-A87(T)         | 1   | 1   | 0   | 2   | 0   | 4   | 0   |



|                                               | M56 | M57 | M60 | M61 | M64 | M72 | M75 |
|-----------------------------------------------|-----|-----|-----|-----|-----|-----|-----|
| <i>Cellulophaga algicola</i> IC166(T)         | 2   | 1   | 0   | 2   | 0   | 0   | 1   |
| <i>Cellulophaga lytica</i> LIM-21(T)          | 4   | 0   | 0   | 0   | 0   | 0   | 1   |
| <i>Croceibacter atlanticus</i> HTCC2559(T)    | 3   | 1   | 0   | 1   | 0   | 0   | 1   |
| <i>Dokdonia donghaensis</i> MED134            | 4   | 1   | 0   | 1   | 0   | 0   | 1   |
| <i>Dokdonia</i> sp. 4H-3-7-5                  | 3   | 1   | 0   | 2   | 0   | 0   | 1   |
| <i>Flavobacteriaceae bacterium</i> S85        | 0   | 0   | 0   | 0   | 0   | 0   | 0   |
| <i>Flavobacterium johnsoniae</i> UW101(T)     | 3   | 0   | 0   | 1   | 0   | 0   | 2   |
| <i>Formosa agariphila</i> KMM 3901(T)         | 2   | 0   | 0   | 2   | 0   | 0   | 0   |
| <i>Gillisia limnaea</i> R-8282(T)             | 4   | 1   | 0   | 1   | 0   | 0   | 0   |
| <i>Gillisia</i> sp. CBA3202                   | 4   | 1   | 0   | 1   | 0   | 0   | 0   |
| <i>Gramella forsetii</i> ' KT0803             | 3   | 1   | 0   | 2   | 0   | 0   | 1   |
| <i>Imtechella halotolerans</i> K1(T)          | 1   | 0   | 0   | 0   | 0   | 0   | 0   |
| <i>Joostella marina</i> En5(T)                | 3   | 0   | 0   | 2   | 0   | 0   | 0   |
| <i>Kordia algicida</i> OT-1(T)                | 4   | 3   | 0   | 1   | 0   | 0   | 1   |
| <i>Leeuwenhoekiella blandensis</i> MED217(T)  | 3   | 2   | 0   | 2   | 0   | 0   | 0   |
| <i>Maribacter</i> sp. HTCC2170                | 3   | 0   | 0   | 2   | 0   | 0   | 0   |
| <i>Mesoflavibacter zeaxanthinifaciens</i> S86 | 3   | 0   | 0   | 0   | 0   | 0   | 2   |
| <i>Muricauda ruestringensis</i> B1(T)         | 3   | 0   | 0   | 1   | 0   | 0   | 0   |
| <i>Polaribacter irgensii</i> 23-P(T)          | 1   | 0   | 0   | 0   | 0   | 0   | 2   |
| <i>Polaribacter</i> sp. Hel1_33_49            | 2   | 0   | 0   | 0   | 0   | 0   | 0   |
| <i>Polaribacter</i> sp. Hel1_85               | 0   | 0   | 0   | 0   | 0   | 0   | 0   |
| <i>Polaribacter</i> sp. MED152                | 2   | 0   | 0   | 0   | 0   | 0   | 1   |
| <i>Psychroflexus gondwanensis</i> ACAM 44(T)  | 2   | 1   | 0   | 1   | 0   | 0   | 1   |
| <i>Psychroflexus torquis</i> 651(T)           | 2   | 1   | 0   | 1   | 0   | 0   | 1   |
| <i>Robiginitalea biformata</i> HTCC2501(T)    | 2   | 0   | 0   | 2   | 0   | 0   | 0   |
| <i>Zobellia galactanivorans</i> Dsij(T)       | 2   | 0   | 0   | 2   | 0   | 0   | 2   |
| <i>Zunogwangia profunda</i> SM-A87(T)         | 6   | 1   | 0   | 2   | 0   | 0   | 1   |

|                                               | M78 | M79 | M81 | M82 | M90 | N10 | P01 |
|-----------------------------------------------|-----|-----|-----|-----|-----|-----|-----|
| <i>Cellulophaga algicola</i> IC166(T)         | 0   | 2   | 0   | 0   | 2   | 0   | 0   |
| <i>Cellulophaga lytica</i> LIM-21(T)          | 0   | 1   | 0   | 0   | 2   | 0   | 0   |
| <i>Croceibacter atlanticus</i> HTCC2559(T)    | 0   | 2   | 0   | 0   | 1   | 0   | 0   |
| <i>Dokdonia donghaensis</i> MED134            | 0   | 2   | 0   | 0   | 1   | 0   | 0   |
| <i>Dokdonia</i> sp. 4H-3-7-5                  | 0   | 3   | 0   | 0   | 1   | 0   | 0   |
| <i>Flavobacteriaceae bacterium</i> S85        | 0   | 3   | 0   | 0   | 0   | 0   | 0   |
| <i>Flavobacterium johnsoniae</i> UW101(T)     | 0   | 2   | 0   | 0   | 1   | 0   | 0   |
| <i>Formosa agariphila</i> KMM 3901(T)         | 0   | 2   | 0   | 1   | 2   | 0   | 0   |
| <i>Gillisia limnaea</i> R-8282(T)             | 0   | 2   | 0   | 0   | 0   | 0   | 0   |
| <i>Gillisia</i> sp. CBA3202                   | 0   | 1   | 0   | 0   | 0   | 0   | 0   |
| <i>Gramella forsetii</i> ' KT0803             | 0   | 2   | 0   | 0   | 0   | 0   | 0   |
| <i>Imtechella halotolerans</i> K1(T)          | 0   | 1   | 0   | 0   | 0   | 0   | 0   |
| <i>Joostella marina</i> En5(T)                | 0   | 1   | 0   | 0   | 2   | 0   | 0   |
| <i>Kordia algicida</i> OT-1(T)                | 0   | 3   | 0   | 1   | 1   | 0   | 0   |
| <i>Leeuwenhoekiella blandensis</i> MED217(T)  | 1   | 2   | 0   | 0   | 1   | 0   | 0   |
| <i>Maribacter</i> sp. HTCC2170                | 1   | 3   | 0   | 0   | 0   | 0   | 1   |
| <i>Mesoflavibacter zeaxanthinifaciens</i> S86 | 0   | 1   | 0   | 0   | 1   | 0   | 0   |
| <i>Muricauda ruestringensis</i> B1(T)         | 0   | 1   | 1   | 0   | 0   | 0   | 1   |
| <i>Polaribacter irgensii</i> 23-P(T)          | 0   | 4   | 0   | 0   | 0   | 0   | 0   |
| <i>Polaribacter</i> sp. Hel1_33_49            | 0   | 1   | 0   | 1   | 0   | 0   | 0   |
| <i>Polaribacter</i> sp. Hel1_85               | 0   | 0   | 0   | 0   | 0   | 0   | 0   |
| <i>Polaribacter</i> sp. MED152                | 0   | 1   | 0   | 1   | 0   | 0   | 0   |
| <i>Psychroflexus gondwanensis</i> ACAM 44(T)  | 0   | 1   | 0   | 0   | 0   | 0   | 0   |
| <i>Psychroflexus torquis</i> 651(T)           | 0   | 4   | 0   | 0   | 0   | 0   | 0   |
| <i>Robiginitalea biformata</i> HTCC2501(T)    | 0   | 3   | 1   | 0   | 0   | 0   | 2   |
| <i>Zobellia galactanivorans</i> Dsij(T)       | 0   | 1   | 0   | 0   | 1   | 0   | 0   |
| <i>Zunogwangia profunda</i> SM-A87(T)         | 0   | 3   | 0   | 0   | 3   | 0   | 1   |

|                                               | S01 | S06 | S08 | S09 | S10 | S11 | S12 |
|-----------------------------------------------|-----|-----|-----|-----|-----|-----|-----|
| <i>Cellulophaga algicola</i> IC166(T)         | 1   | 0   | 2   | 24  | 1   | 1   | 8   |
| <i>Cellulophaga lytica</i> LIM-21(T)          | 1   | 0   | 1   | 20  | 1   | 1   | 7   |
| <i>Croceibacter atlanticus</i> HTCC2559(T)    | 1   | 0   | 3   | 14  | 0   | 0   | 8   |
| <i>Dokdonia donghaensis</i> MED134            | 1   | 0   | 5   | 22  | 1   | 1   | 8   |
| <i>Dokdonia</i> sp. 4H-3-7-5                  | 1   | 0   | 5   | 22  | 1   | 1   | 2   |
| <i>Flavobacteriaceae bacterium</i> S85        | 1   | 0   | 2   | 10  | 0   | 0   | 6   |
| <i>Flavobacterium johnsoniae</i> UW101(T)     | 2   | 0   | 5   | 37  | 0   | 1   | 7   |
| <i>Formosa agariphila</i> KMM 3901(T)         | 2   | 0   | 6   | 32  | 1   | 0   | 6   |
| <i>Gillisia limnaea</i> R-8282(T)             | 1   | 0   | 3   | 31  | 1   | 0   | 11  |
| <i>Gillisia</i> sp. CBA3202                   | 1   | 0   | 2   | 22  | 1   | 0   | 5   |
| <i>Gramella forsetii</i> ' KT0803             | 2   | 0   | 2   | 23  | 1   | 1   | 6   |
| <i>Imtechella halotolerans</i> K1(T)          | 2   | 0   | 6   | 24  | 1   | 0   | 10  |
| <i>Joostella marina</i> En5(T)                | 1   | 0   | 3   | 34  | 1   | 1   | 10  |
| <i>Kordia algicida</i> OT-1(T)                | 3   | 0   | 14  | 30  | 0   | 1   | 8   |
| <i>Leeuwenhoekiella blandensis</i> MED217(T)  | 3   | 0   | 2   | 40  | 1   | 0   | 9   |
| <i>Maribacter</i> sp. HTCC2170                | 1   | 0   | 2   | 39  | 2   | 1   | 22  |
| <i>Mesoflavibacter zeaxanthinifaciens</i> S86 | 2   | 0   | 2   | 44  | 1   | 1   | 9   |
| <i>Muricauda ruestringensis</i> B1(T)         | 2   | 0   | 2   | 31  | 2   | 1   | 24  |
| <i>Polaribacter irgensii</i> 23-P(T)          | 1   | 0   | 3   | 24  | 0   | 0   | 8   |
| <i>Polaribacter</i> sp. Hel1_33_49            | 1   | 0   | 2   | 18  | 1   | 0   | 5   |
| <i>Polaribacter</i> sp. Hel1_85               | 4   | 1   | 18  | 9   | 1   | 0   | 7   |
| <i>Polaribacter</i> sp. MED152                | 3   | 0   | 9   | 27  | 0   | 0   | 11  |
| <i>Psychroflexus gondwanensis</i> ACAM 44(T)  | 2   | 0   | 4   | 25  | 1   | 0   | 5   |
| <i>Psychroflexus torquis</i> 651(T)           | 4   | 0   | 8   | 31  | 1   | 0   | 16  |
| <i>Robiginitalea biformata</i> HTCC2501(T)    | 2   | 0   | 4   | 34  | 1   | 1   | 19  |
| <i>Zobellia galactanivorans</i> Dsij(T)       | 1   | 0   | 2   | 32  | 0   | 1   | 10  |
| <i>Zunogwangia profunda</i> SM-A87(T)         | 1   | 0   | 1   | 41  | 1   | 0   | 9   |

|                                               | S13 | S14 | S15 | S16 | S24 | S26 | S33 |
|-----------------------------------------------|-----|-----|-----|-----|-----|-----|-----|
| <i>Cellulophaga algicola</i> IC166(T)         | 1   | 2   | 0   | 3   | 2   | 1   | 16  |
| <i>Cellulophaga lytica</i> LIM-21(T)          | 1   | 2   | 2   | 3   | 4   | 1   | 9   |
| <i>Croceibacter atlanticus</i> HTCC2559(T)    | 0   | 2   | 2   | 3   | 3   | 1   | 10  |
| <i>Dokdonia donghaensis</i> MED134            | 0   | 2   | 1   | 3   | 2   | 1   | 8   |
| <i>Dokdonia</i> sp. 4H-3-7-5                  | 0   | 2   | 3   | 3   | 2   | 1   | 8   |
| <i>Flavobacteriaceae bacterium</i> S85        | 0   | 1   | 0   | 3   | 2   | 1   | 5   |
| <i>Flavobacterium johnsoniae</i> UW101(T)     | 0   | 3   | 0   | 3   | 2   | 1   | 16  |
| <i>Formosa agariphila</i> KMM 3901(T)         | 1   | 2   | 1   | 3   | 5   | 1   | 9   |
| <i>Gillisia limnaea</i> R-8282(T)             | 1   | 2   | 1   | 3   | 2   | 1   | 10  |
| <i>Gillisia</i> sp. CBA3202                   | 1   | 2   | 0   | 3   | 2   | 0   | 12  |
| <i>Gramella forsetii</i> ' KT0803             | 1   | 2   | 0   | 3   | 1   | 1   | 12  |
| <i>Imtechella halotolerans</i> K1(T)          | 0   | 1   | 2   | 2   | 2   | 1   | 8   |
| <i>Joostella marina</i> En5(T)                | 1   | 2   | 1   | 4   | 2   | 1   | 9   |
| <i>Kordia algicida</i> OT-1(T)                | 0   | 1   | 1   | 3   | 3   | 2   | 13  |
| <i>Leeuwenhoekiella blandensis</i> MED217(T)  | 0   | 2   | 0   | 3   | 3   | 1   | 12  |
| <i>Maribacter</i> sp. HTCC2170                | 1   | 2   | 3   | 3   | 1   | 2   | 11  |
| <i>Mesoflavibacter zeaxanthinifaciens</i> S86 | 1   | 2   | 2   | 5   | 2   | 4   | 9   |
| <i>Muricauda ruestringensis</i> B1(T)         | 1   | 3   | 3   | 3   | 2   | 2   | 6   |
| <i>Polaribacter irgensii</i> 23-P(T)          | 0   | 1   | 1   | 3   | 1   | 2   | 8   |
| <i>Polaribacter</i> sp. Hel1_33_49            | 0   | 1   | 1   | 4   | 2   | 1   | 16  |
| <i>Polaribacter</i> sp. Hel1_85               | 0   | 1   | 4   | 3   | 0   | 4   | 13  |
| <i>Polaribacter</i> sp. MED152                | 0   | 1   | 1   | 3   | 1   | 1   | 12  |
| <i>Psychroflexus gondwanensis</i> ACAM 44(T)  | 0   | 2   | 1   | 3   | 2   | 1   | 8   |
| <i>Psychroflexus torquis</i> 651(T)           | 0   | 2   | 2   | 3   | 2   | 1   | 14  |
| <i>Robiginitalea biformata</i> HTCC2501(T)    | 1   | 2   | 2   | 3   | 1   | 2   | 10  |
| <i>Zobellia galactanivorans</i> Dsij(T)       | 1   | 2   | 1   | 4   | 1   | 2   | 16  |
| <i>Zunogwangia profunda</i> SM-A87(T)         | 1   | 2   | 2   | 3   | 1   | 1   | 14  |

|                                               | S37 | S41 | S45 | S46 | S49 | S51 | S53 |
|-----------------------------------------------|-----|-----|-----|-----|-----|-----|-----|
| <i>Cellulophaga algicola</i> IC166(T)         | 0   | 8   | 2   | 0   | 1   | 1   | 0   |
| <i>Cellulophaga lytica</i> LIM-21(T)          | 0   | 5   | 2   | 0   | 0   | 1   | 0   |
| <i>Croceibacter atlanticus</i> HTCC2559(T)    | 0   | 4   | 0   | 0   | 0   | 1   | 0   |
| <i>Dokdonia donghaensis</i> MED134            | 0   | 4   | 0   | 0   | 0   | 1   | 0   |
| <i>Dokdonia</i> sp. 4H-3-7-5                  | 0   | 4   | 0   | 0   | 0   | 1   | 0   |
| <i>Flavobacteriaceae bacterium</i> S85        | 0   | 2   | 1   | 0   | 1   | 1   | 0   |
| <i>Flavobacterium johnsoniae</i> UW101(T)     | 0   | 6   | 0   | 2   | 1   | 2   | 0   |
| <i>Formosa agariphila</i> KMM 3901(T)         | 0   | 4   | 0   | 2   | 0   | 1   | 0   |
| <i>Gillisia limnaea</i> R-8282(T)             | 0   | 8   | 0   | 0   | 0   | 2   | 0   |
| <i>Gillisia</i> sp. CBA3202                   | 0   | 3   | 0   | 0   | 0   | 1   | 0   |
| <i>Gramella forsetii</i> ' KT0803             | 0   | 5   | 0   | 0   | 0   | 2   | 0   |
| <i>Imtechella halotolerans</i> K1(T)          | 0   | 7   | 0   | 1   | 1   | 1   | 0   |
| <i>Joostella marina</i> En5(T)                | 0   | 9   | 0   | 0   | 1   | 1   | 0   |
| <i>Kordia algicida</i> OT-1(T)                | 0   | 7   | 1   | 1   | 1   | 4   | 1   |
| <i>Leeuwenhoekiella blandensis</i> MED217(T)  | 0   | 9   | 0   | 0   | 0   | 1   | 0   |
| <i>Maribacter</i> sp. HTCC2170                | 0   | 11  | 2   | 0   | 1   | 1   | 0   |
| <i>Mesoflavibacter zeaxanthinifaciens</i> S86 | 0   | 13  | 4   | 0   | 1   | 2   | 0   |
| <i>Muricauda ruestringensis</i> B1(T)         | 0   | 6   | 2   | 0   | 1   | 0   | 0   |
| <i>Polaribacter irgensii</i> 23-P(T)          | 0   | 12  | 2   | 0   | 0   | 1   | 0   |
| <i>Polaribacter</i> sp. Hel1_33_49            | 0   | 7   | 1   | 0   | 0   | 1   | 0   |
| <i>Polaribacter</i> sp. Hel1_85               | 0   | 10  | 1   | 0   | 0   | 1   | 0   |
| <i>Polaribacter</i> sp. MED152                | 0   | 6   | 1   | 0   | 0   | 1   | 0   |
| <i>Psychroflexus gondwanensis</i> ACAM 44(T)  | 0   | 6   | 0   | 0   | 1   | 1   | 0   |
| <i>Psychroflexus torquis</i> 651(T)           | 0   | 11  | 0   | 0   | 0   | 3   | 0   |
| <i>Robiginitalea biformata</i> HTCC2501(T)    | 0   | 4   | 4   | 0   | 1   | 0   | 0   |
| <i>Zobellia galactanivorans</i> Dsij(T)       | 0   | 7   | 2   | 0   | 1   | 0   | 0   |
| <i>Zunogwangia profunda</i> SM-A87(T)         | 0   | 10  | 0   | 0   | 0   | 1   | 0   |

|                                               | S54 | S66 | T02 | T03 | U32 | U48 | U49 |
|-----------------------------------------------|-----|-----|-----|-----|-----|-----|-----|
| <i>Cellulophaga algicola</i> IC166(T)         | 4   | 1   | 1   | 1   | 0   | 0   | 0   |
| <i>Cellulophaga lytica</i> LIM-21(T)          | 4   | 1   | 1   | 1   | 0   | 0   | 0   |
| <i>Croceibacter atlanticus</i> HTCC2559(T)    | 4   | 1   | 2   | 1   | 0   | 0   | 0   |
| <i>Dokdonia donghaensis</i> MED134            | 4   | 1   | 2   | 2   | 0   | 0   | 0   |
| <i>Dokdonia</i> sp. 4H-3-7-5                  | 4   | 1   | 2   | 1   | 0   | 0   | 0   |
| <i>Flavobacteriaceae bacterium</i> S85        | 4   | 1   | 0   | 0   | 1   | 0   | 0   |
| <i>Flavobacterium johnsoniae</i> UW101(T)     | 4   | 2   | 1   | 0   | 1   | 0   | 0   |
| <i>Formosa agariphila</i> KMM 3901(T)         | 4   | 1   | 0   | 1   | 1   | 0   | 0   |
| <i>Gillisia limnaea</i> R-8282(T)             | 4   | 1   | 3   | 1   | 0   | 0   | 0   |
| <i>Gillisia</i> sp. CBA3202                   | 4   | 1   | 2   | 1   | 0   | 0   | 0   |
| <i>Gramella forsetii</i> ' KT0803             | 4   | 1   | 3   | 1   | 0   | 0   | 0   |
| <i>Imtechella halotolerans</i> K1(T)          | 4   | 1   | 2   | 1   | 1   | 0   | 0   |
| <i>Joostella marina</i> En5(T)                | 4   | 1   | 2   | 1   | 0   | 0   | 0   |
| <i>Kordia algicida</i> OT-1(T)                | 4   | 1   | 3   | 1   | 0   | 0   | 0   |
| <i>Leeuwenhoekiella blandensis</i> MED217(T)  | 4   | 1   | 2   | 1   | 0   | 0   | 0   |
| <i>Maribacter</i> sp. HTCC2170                | 4   | 0   | 1   | 1   | 1   | 0   | 0   |
| <i>Mesoflavibacter zeaxanthinifaciens</i> S86 | 7   | 1   | 1   | 2   | 0   | 0   | 0   |
| <i>Muricauda ruestringensis</i> B1(T)         | 4   | 1   | 1   | 1   | 0   | 0   | 0   |
| <i>Polaribacter irgensii</i> 23-P(T)          | 5   | 1   | 1   | 1   | 0   | 0   | 0   |
| <i>Polaribacter</i> sp. Hel1_33_49            | 4   | 1   | 2   | 1   | 0   | 0   | 0   |
| <i>Polaribacter</i> sp. Hel1_85               | 4   | 1   | 3   | 1   | 0   | 1   | 0   |
| <i>Polaribacter</i> sp. MED152                | 4   | 1   | 1   | 1   | 1   | 0   | 0   |
| <i>Psychroflexus gondwanensis</i> ACAM 44(T)  | 4   | 1   | 1   | 1   | 0   | 0   | 0   |
| <i>Psychroflexus torquis</i> 651(T)           | 5   | 1   | 1   | 2   | 0   | 0   | 0   |
| <i>Robiginitalea biformata</i> HTCC2501(T)    | 4   | 0   | 1   | 2   | 0   | 0   | 0   |
| <i>Zobellia galactanivorans</i> Dsij(T)       | 5   | 1   | 1   | 1   | 0   | 0   | 0   |
| <i>Zunogwangia profunda</i> SM-A87(T)         | 4   | 1   | 2   | 2   | 1   | 0   | 0   |

|                                               | U62 | U69 CAZy families |    | CBM1 | CBM2 | CBM3 | CBM4 |
|-----------------------------------------------|-----|-------------------|----|------|------|------|------|
| <i>Cellulophaga algicola</i> IC166(T)         | 0   | 4                 | 63 | 0    | 0    | 0    | 1    |
| <i>Cellulophaga lytica</i> LIM-21(T)          | 0   | 1                 | 55 | 0    | 0    | 0    | 0    |
| <i>Croceibacter atlanticus</i> HTCC2559(T)    | 0   | 1                 | 34 | 0    | 0    | 0    | 0    |
| <i>Dokdonia donghaensis</i> MED134            | 2   | 5                 | 41 | 0    | 0    | 0    | 1    |
| <i>Dokdonia</i> sp. 4H-3-7-5                  | 2   | 1                 | 26 | 0    | 0    | 0    | 0    |
| <i>Flavobacteriaceae bacterium</i> S85        | 0   | 0                 | 61 | 0    | 0    | 0    | 0    |
| <i>Flavobacterium johnsoniae</i> UW101(T)     | 0   | 0                 | 86 | 0    | 0    | 0    | 0    |
| <i>Formosa agariphila</i> KMM 3901(T)         | 0   | 0                 | 66 | 0    | 0    | 0    | 0    |
| <i>Gillisia limnaea</i> R-8282(T)             | 2   | 0                 | 52 | 0    | 0    | 0    | 0    |
| <i>Gillisia</i> sp. CBA3202                   | 2   | 2                 | 34 | 0    | 0    | 0    | 0    |
| <i>Gramella forsetii</i> ' KT0803             | 2   | 4                 | 54 | 0    | 0    | 0    | 0    |
| <i>Imtechella halotolerans</i> K1(T)          | 0   | 1                 | 48 | 0    | 0    | 0    | 0    |
| <i>Joostella marina</i> En5(T)                | 0   | 0                 | 56 | 0    | 0    | 0    | 0    |
| <i>Kordia algicida</i> OT-1(T)                | 0   | 0                 | 45 | 0    | 0    | 0    | 0    |
| <i>Leeuwenhoekiella blandensis</i> MED217(T)  | 2   | 1                 | 63 | 0    | 0    | 0    | 0    |
| <i>Maribacter</i> sp. HTCC2170                | 0   | 0                 | 57 | 0    | 0    | 0    | 0    |
| <i>Mesoflavibacter zeaxanthinifaciens</i> S86 | 0   | 1                 | 66 | 0    | 0    | 0    | 0    |
| <i>Muricauda ruestringensis</i> B1(T)         | 2   | 0                 | 46 | 0    | 0    | 0    | 0    |
| <i>Polaribacter irgensii</i> 23-P(T)          | 0   | 1                 | 32 | 0    | 0    | 0    | 0    |
| <i>Polaribacter</i> sp. Hel1_33_49            | 0   | 1                 | 35 | 0    | 0    | 0    | 0    |
| <i>Polaribacter</i> sp. Hel1_85               | 0   | 0                 | 51 | 0    | 0    | 0    | 1    |
| <i>Polaribacter</i> sp. MED152                | 0   | 0                 | 41 | 0    | 0    | 0    | 0    |
| <i>Psychroflexus gondwanensis</i> ACAM 44(T)  | 0   | 0                 | 35 | 0    | 0    | 0    | 1    |
| <i>Psychroflexus torquis</i> 651(T)           | 0   | 0                 | 39 | 0    | 0    | 0    | 1    |
| <i>Robiginitalea biformata</i> HTCC2501(T)    | 2   | 0                 | 43 | 0    | 0    | 0    | 0    |
| <i>Zobellia galactanivorans</i> Dsij(T)       | 0   | 3                 | 89 | 0    | 0    | 0    | 1    |
| <i>Zunogwangia profunda</i> SM-A87(T)         | 2   | 0                 | 70 | 0    | 0    | 0    | 1    |

|                                               | CBM5 | CBM6 | CBM7 | CBM8 | CBM9 | CBM10 | CBM11 |
|-----------------------------------------------|------|------|------|------|------|-------|-------|
| <i>Cellulophaga algicola</i> IC166(T)         | 1    | 2    | 0    | 0    | 4    | 0     | 0     |
| <i>Cellulophaga lytica</i> LIM-21(T)          | 0    | 2    | 0    | 0    | 3    | 0     | 1     |
| <i>Croceibacter atlanticus</i> HTCC2559(T)    | 1    | 0    | 0    | 0    | 1    | 0     | 0     |
| <i>Dokdonia donghaensis</i> MED134            | 0    | 0    | 0    | 0    | 4    | 0     | 0     |
| <i>Dokdonia</i> sp. 4H-3-7-5                  | 0    | 0    | 0    | 0    | 0    | 0     | 0     |
| <i>Flavobacteriaceae bacterium</i> S85        | 0    | 0    | 0    | 0    | 1    | 0     | 0     |
| <i>Flavobacterium johnsoniae</i> UW101(T)     | 0    | 4    | 0    | 0    | 3    | 0     | 0     |
| <i>Formosa agariphila</i> KMM 3901(T)         | 0    | 2    | 0    | 0    | 2    | 0     | 0     |
| <i>Gillisia limnaea</i> R-8282(T)             | 0    | 0    | 0    | 0    | 1    | 0     | 1     |
| <i>Gillisia</i> sp. CBA3202                   | 0    | 0    | 0    | 0    | 1    | 0     | 1     |
| <i>Gramella forsetii</i> ' KT0803             | 0    | 1    | 0    | 0    | 1    | 0     | 1     |
| <i>Imtechella halotolerans</i> K1(T)          | 0    | 0    | 0    | 0    | 2    | 0     | 0     |
| <i>Joostella marina</i> En5(T)                | 0    | 0    | 0    | 0    | 1    | 0     | 0     |
| <i>Kordia algicida</i> OT-1(T)                | 0    | 0    | 0    | 0    | 3    | 0     | 0     |
| <i>Leeuwenhoekiella blandensis</i> MED217(T)  | 0    | 0    | 0    | 0    | 2    | 0     | 0     |
| <i>Maribacter</i> sp. HTCC2170                | 0    | 0    | 0    | 0    | 10   | 0     | 0     |
| <i>Mesoflavibacter zeaxanthinifaciens</i> S86 | 0    | 0    | 0    | 0    | 3    | 0     | 0     |
| <i>Muricauda ruestringensis</i> B1(T)         | 0    | 0    | 0    | 0    | 3    | 0     | 0     |
| <i>Polaribacter irgensii</i> 23-P(T)          | 0    | 1    | 0    | 0    | 1    | 0     | 1     |
| <i>Polaribacter</i> sp. Hel1_33_49            | 0    | 2    | 0    | 0    | 3    | 0     | 0     |
| <i>Polaribacter</i> sp. Hel1_85               | 0    | 2    | 0    | 0    | 1    | 0     | 0     |
| <i>Polaribacter</i> sp. MED152                | 0    | 0    | 0    | 0    | 1    | 0     | 1     |
| <i>Psychroflexus gondwanensis</i> ACAM 44(T)  | 0    | 0    | 0    | 0    | 0    | 0     | 0     |
| <i>Psychroflexus torquis</i> 651(T)           | 0    | 0    | 0    | 0    | 1    | 0     | 0     |
| <i>Robiginitalea biformata</i> HTCC2501(T)    | 0    | 2    | 0    | 0    | 5    | 0     | 0     |
| <i>Zobellia galactanivorans</i> Dsij(T)       | 1    | 6    | 0    | 0    | 0    | 0     | 0     |
| <i>Zunogwangia profunda</i> SM-A87(T)         | 0    | 2    | 0    | 0    | 1    | 0     | 0     |



|                                               | CBM12 | CBM13 | CBM14 | CBM15 | CBM16 | CBM17 | CBM18 |
|-----------------------------------------------|-------|-------|-------|-------|-------|-------|-------|
| <i>Cellulophaga algicola</i> IC166(T)         | 0     | 0     | 0     | 0     | 0     | 0     | 0     |
| <i>Cellulophaga lytica</i> LIM-21(T)          | 0     | 1     | 0     | 0     | 0     | 0     | 0     |
| <i>Croceibacter atlanticus</i> HTCC2559(T)    | 0     | 0     | 0     | 0     | 0     | 0     | 0     |
| <i>Dokdonia donghaensis</i> MED134            | 0     | 0     | 0     | 0     | 0     | 0     | 0     |
| <i>Dokdonia</i> sp. 4H-3-7-5                  | 0     | 0     | 0     | 0     | 0     | 0     | 0     |
| <i>Flavobacteriaceae bacterium</i> S85        | 0     | 0     | 0     | 0     | 0     | 0     | 0     |
| <i>Flavobacterium johnsoniae</i> UW101(T)     | 0     | 4     | 0     | 0     | 0     | 0     | 0     |
| <i>Formosa agariphila</i> KMM 3901(T)         | 0     | 0     | 0     | 0     | 0     | 0     | 0     |
| <i>Gillisia limnaea</i> R-8282(T)             | 0     | 0     | 0     | 0     | 0     | 0     | 0     |
| <i>Gillisia</i> sp. CBA3202                   | 0     | 0     | 0     | 0     | 0     | 0     | 0     |
| <i>Gramella forsetii</i> ' KT0803             | 0     | 0     | 0     | 0     | 3     | 0     | 0     |
| <i>Imtechella halotolerans</i> K1(T)          | 0     | 0     | 0     | 0     | 0     | 0     | 0     |
| <i>Joostella marina</i> En5(T)                | 0     | 0     | 0     | 0     | 0     | 0     | 0     |
| <i>Kordia algicida</i> OT-1(T)                | 0     | 0     | 0     | 0     | 0     | 0     | 0     |
| <i>Leeuwenhoekiella blandensis</i> MED217(T)  | 0     | 0     | 0     | 0     | 0     | 0     | 0     |
| <i>Maribacter</i> sp. HTCC2170                | 0     | 0     | 0     | 0     | 0     | 0     | 0     |
| <i>Mesoflavibacter zeaxanthinifaciens</i> S86 | 0     | 0     | 0     | 0     | 0     | 0     | 0     |
| <i>Muricauda ruestringensis</i> B1(T)         | 0     | 0     | 0     | 0     | 0     | 0     | 0     |
| <i>Polaribacter irgensii</i> 23-P(T)          | 0     | 0     | 0     | 0     | 0     | 0     | 0     |
| <i>Polaribacter</i> sp. Hel1_33_49            | 0     | 0     | 0     | 0     | 0     | 0     | 0     |
| <i>Polaribacter</i> sp. Hel1_85               | 0     | 0     | 0     | 0     | 0     | 0     | 0     |
| <i>Polaribacter</i> sp. MED152                | 0     | 0     | 0     | 0     | 0     | 0     | 0     |
| <i>Psychroflexus gondwanensis</i> ACAM 44(T)  | 0     | 0     | 0     | 0     | 0     | 0     | 0     |
| <i>Psychroflexus torquis</i> 651(T)           | 0     | 0     | 0     | 0     | 0     | 0     | 0     |
| <i>Robiginitalea biformata</i> HTCC2501(T)    | 0     | 0     | 0     | 0     | 0     | 0     | 0     |
| <i>Zobellia galactanivorans</i> Dsij(T)       | 1     | 1     | 0     | 0     | 2     | 0     | 0     |
| <i>Zunogwangia profunda</i> SM-A87(T)         | 0     | 0     | 0     | 0     | 0     | 0     | 0     |

|                                               | CBM19 | CBM20 | CBM21 | CBM22 | CBM23 | CBM24 | CBM25 |
|-----------------------------------------------|-------|-------|-------|-------|-------|-------|-------|
| <i>Cellulophaga algicola</i> IC166(T)         | 0     | 1     | 0     | 0     | 0     | 0     | 0     |
| <i>Cellulophaga lytica</i> LIM-21(T)          | 0     | 0     | 0     | 0     | 0     | 0     | 0     |
| <i>Croceibacter atlanticus</i> HTCC2559(T)    | 0     | 0     | 0     | 0     | 0     | 0     | 0     |
| <i>Dokdonia donghaensis</i> MED134            | 0     | 0     | 0     | 0     | 0     | 0     | 0     |
| <i>Dokdonia</i> sp. 4H-3-7-5                  | 0     | 0     | 0     | 0     | 0     | 0     | 0     |
| <i>Flavobacteriaceae bacterium</i> S85        | 0     | 0     | 0     | 0     | 0     | 0     | 0     |
| <i>Flavobacterium johnsoniae</i> UW101(T)     | 0     | 0     | 0     | 0     | 0     | 0     | 0     |
| <i>Formosa agariphila</i> KMM 3901(T)         | 0     | 0     | 0     | 0     | 0     | 0     | 0     |
| <i>Gillisia limnaea</i> R-8282(T)             | 0     | 0     | 0     | 1     | 0     | 0     | 0     |
| <i>Gillisia</i> sp. CBA3202                   | 0     | 0     | 0     | 0     | 0     | 0     | 0     |
| <i>Gramella forsetii</i> ' KT0803             | 0     | 0     | 0     | 1     | 0     | 0     | 0     |
| <i>Imtechella halotolerans</i> K1(T)          | 0     | 0     | 0     | 0     | 0     | 0     | 0     |
| <i>Joostella marina</i> En5(T)                | 0     | 0     | 0     | 0     | 0     | 0     | 0     |
| <i>Kordia algicida</i> OT-1(T)                | 0     | 0     | 0     | 0     | 0     | 0     | 0     |
| <i>Leeuwenhoekiella blandensis</i> MED217(T)  | 0     | 0     | 0     | 0     | 0     | 0     | 0     |
| <i>Maribacter</i> sp. HTCC2170                | 0     | 0     | 0     | 0     | 0     | 0     | 0     |
| <i>Mesoflavibacter zeaxanthinifaciens</i> S86 | 0     | 1     | 0     | 0     | 0     | 0     | 0     |
| <i>Muricauda ruestringensis</i> B1(T)         | 0     | 0     | 0     | 0     | 0     | 0     | 0     |
| <i>Polaribacter irgensii</i> 23-P(T)          | 0     | 0     | 0     | 0     | 0     | 0     | 0     |
| <i>Polaribacter</i> sp. Hel1_33_49            | 0     | 0     | 0     | 0     | 0     | 0     | 0     |
| <i>Polaribacter</i> sp. Hel1_85               | 0     | 0     | 0     | 1     | 0     | 0     | 0     |
| <i>Polaribacter</i> sp. MED152                | 0     | 0     | 0     | 0     | 0     | 0     | 0     |
| <i>Psychroflexus gondwanensis</i> ACAM 44(T)  | 0     | 0     | 0     | 0     | 0     | 0     | 0     |
| <i>Psychroflexus torquis</i> 651(T)           | 0     | 0     | 0     | 0     | 0     | 0     | 0     |
| <i>Robiginitalea biformata</i> HTCC2501(T)    | 0     | 0     | 0     | 0     | 0     | 0     | 0     |
| <i>Zobellia galactanivorans</i> Dsij(T)       | 0     | 1     | 0     | 2     | 0     | 0     | 0     |
| <i>Zunogwangia profunda</i> SM-A87(T)         | 0     | 0     | 0     | 0     | 0     | 0     | 0     |

|                                               | CBM26 | CBM27 | CBM28 | CBM29 | CBM30 | CBM31 | CBM32 |
|-----------------------------------------------|-------|-------|-------|-------|-------|-------|-------|
| <i>Cellulophaga algicola</i> IC166(T)         | 0     | 0     | 0     | 0     | 0     | 0     | 1     |
| <i>Cellulophaga lytica</i> LIM-21(T)          | 0     | 0     | 0     | 0     | 0     | 0     | 2     |
| <i>Croceibacter atlanticus</i> HTCC2559(T)    | 0     | 0     | 0     | 0     | 0     | 0     | 1     |
| <i>Dokdonia donghaensis</i> MED134            | 0     | 0     | 0     | 0     | 0     | 0     | 1     |
| <i>Dokdonia</i> sp. 4H-3-7-5                  | 0     | 0     | 0     | 0     | 0     | 0     | 1     |
| <i>Flavobacteriaceae bacterium</i> S85        | 0     | 0     | 0     | 0     | 0     | 0     | 2     |
| <i>Flavobacterium johnsoniae</i> UW101(T)     | 1     | 0     | 0     | 0     | 0     | 0     | 4     |
| <i>Formosa agariphila</i> KMM 3901(T)         | 0     | 0     | 0     | 0     | 0     | 0     | 5     |
| <i>Gillisia limnaea</i> R-8282(T)             | 0     | 0     | 0     | 0     | 0     | 0     | 1     |
| <i>Gillisia</i> sp. CBA3202                   | 0     | 0     | 0     | 0     | 0     | 0     | 1     |
| <i>Gramella forsetii</i> ' KT0803             | 0     | 0     | 0     | 0     | 0     | 0     | 1     |
| <i>Imtechella halotolerans</i> K1(T)          | 0     | 0     | 0     | 0     | 0     | 0     | 6     |
| <i>Joostella marina</i> En5(T)                | 0     | 0     | 0     | 0     | 0     | 0     | 2     |
| <i>Kordia algicida</i> OT-1(T)                | 0     | 0     | 0     | 0     | 0     | 0     | 2     |
| <i>Leeuwenhoekiella blandensis</i> MED217(T)  | 0     | 0     | 0     | 0     | 0     | 0     | 5     |
| <i>Maribacter</i> sp. HTCC2170                | 0     | 0     | 0     | 0     | 1     | 0     | 4     |
| <i>Mesoflavibacter zeaxanthinifaciens</i> S86 | 0     | 0     | 0     | 0     | 0     | 0     | 3     |
| <i>Muricauda ruestringensis</i> B1(T)         | 0     | 0     | 0     | 0     | 0     | 0     | 2     |
| <i>Polaribacter irgensii</i> 23-P(T)          | 0     | 0     | 0     | 0     | 0     | 0     | 0     |
| <i>Polaribacter</i> sp. Hel1_33_49            | 0     | 0     | 0     | 0     | 0     | 0     | 1     |
| <i>Polaribacter</i> sp. Hel1_85               | 0     | 0     | 0     | 0     | 0     | 0     | 3     |
| <i>Polaribacter</i> sp. MED152                | 0     | 0     | 0     | 0     | 0     | 0     | 2     |
| <i>Psychroflexus gondwanensis</i> ACAM 44(T)  | 0     | 0     | 0     | 0     | 0     | 0     | 0     |
| <i>Psychroflexus torquis</i> 651(T)           | 0     | 0     | 0     | 0     | 0     | 0     | 0     |
| <i>Robiginitalea biformata</i> HTCC2501(T)    | 0     | 0     | 0     | 0     | 0     | 0     | 1     |
| <i>Zobellia galactanivorans</i> Dsij(T)       | 0     | 0     | 0     | 0     | 0     | 0     | 5     |
| <i>Zunogwangia profunda</i> SM-A87(T)         | 0     | 0     | 0     | 0     | 0     | 0     | 7     |

|                                               | CBM33 | CBM34 | CBM35 | CBM36 | CBM37 | CBM38 | CBM39 |
|-----------------------------------------------|-------|-------|-------|-------|-------|-------|-------|
| <i>Cellulophaga algicola</i> IC166(T)         | 0     | 0     | 0     | 0     | 0     | 0     | 0     |
| <i>Cellulophaga lytica</i> LIM-21(T)          | 0     | 0     | 1     | 0     | 0     | 0     | 0     |
| <i>Croceibacter atlanticus</i> HTCC2559(T)    | 0     | 0     | 0     | 0     | 0     | 0     | 0     |
| <i>Dokdonia donghaensis</i> MED134            | 0     | 0     | 0     | 0     | 0     | 0     | 0     |
| <i>Dokdonia</i> sp. 4H-3-7-5                  | 0     | 0     | 0     | 0     | 0     | 0     | 0     |
| <i>Flavobacteriaceae bacterium</i> S85        | 0     | 0     | 1     | 0     | 0     | 0     | 0     |
| <i>Flavobacterium johnsoniae</i> UW101(T)     | 0     | 0     | 2     | 0     | 0     | 0     | 0     |
| <i>Formosa agariphila</i> KMM 3901(T)         | 0     | 0     | 2     | 0     | 0     | 0     | 0     |
| <i>Gillisia limnaea</i> R-8282(T)             | 0     | 0     | 0     | 0     | 0     | 0     | 0     |
| <i>Gillisia</i> sp. CBA3202                   | 0     | 0     | 0     | 0     | 0     | 0     | 0     |
| <i>Gramella forsetii</i> ' KT0803             | 0     | 0     | 0     | 0     | 0     | 0     | 0     |
| <i>Imtechella halotolerans</i> K1(T)          | 0     | 0     | 0     | 0     | 0     | 0     | 0     |
| <i>Joostella marina</i> En5(T)                | 0     | 0     | 0     | 0     | 0     | 0     | 0     |
| <i>Kordia algicida</i> OT-1(T)                | 0     | 0     | 0     | 0     | 0     | 0     | 0     |
| <i>Leeuwenhoekiella blandensis</i> MED217(T)  | 0     | 0     | 0     | 0     | 0     | 0     | 0     |
| <i>Maribacter</i> sp. HTCC2170                | 0     | 0     | 0     | 0     | 0     | 0     | 0     |
| <i>Mesoflavibacter zeaxanthinifaciens</i> S86 | 0     | 0     | 0     | 0     | 0     | 0     | 0     |
| <i>Muricauda ruestringensis</i> B1(T)         | 0     | 0     | 0     | 0     | 0     | 0     | 0     |
| <i>Polaribacter irgensii</i> 23-P(T)          | 0     | 0     | 0     | 0     | 0     | 0     | 0     |
| <i>Polaribacter</i> sp. Hel1_33_49            | 0     | 0     | 0     | 0     | 0     | 0     | 0     |
| <i>Polaribacter</i> sp. Hel1_85               | 0     | 0     | 2     | 0     | 0     | 0     | 0     |
| <i>Polaribacter</i> sp. MED152                | 0     | 0     | 0     | 0     | 0     | 0     | 0     |
| <i>Psychroflexus gondwanensis</i> ACAM 44(T)  | 0     | 0     | 0     | 0     | 0     | 0     | 0     |
| <i>Psychroflexus torquis</i> 651(T)           | 0     | 0     | 0     | 0     | 0     | 0     | 0     |
| <i>Robiginitalea biformata</i> HTCC2501(T)    | 0     | 0     | 0     | 0     | 0     | 0     | 0     |
| <i>Zobellia galactanivorans</i> Dsij(T)       | 0     | 0     | 2     | 0     | 0     | 0     | 0     |
| <i>Zunogwangia profunda</i> SM-A87(T)         | 0     | 0     | 1     | 2     | 0     | 0     | 0     |

|                                               | CBM40 | CBM41 | CBM42 | CBM43 | CBM44 | CBM45 | CBM46 |
|-----------------------------------------------|-------|-------|-------|-------|-------|-------|-------|
| <i>Cellulophaga algicola</i> IC166(T)         | 0     | 0     | 0     | 0     | 0     | 0     | 0     |
| <i>Cellulophaga lytica</i> LIM-21(T)          | 0     | 0     | 0     | 0     | 0     | 0     | 0     |
| <i>Croceibacter atlanticus</i> HTCC2559(T)    | 0     | 0     | 0     | 0     | 0     | 0     | 0     |
| <i>Dokdonia donghaensis</i> MED134            | 0     | 0     | 0     | 0     | 0     | 0     | 0     |
| <i>Dokdonia</i> sp. 4H-3-7-5                  | 0     | 0     | 0     | 0     | 0     | 0     | 0     |
| <i>Flavobacteriaceae bacterium</i> S85        | 0     | 0     | 0     | 0     | 0     | 0     | 0     |
| <i>Flavobacterium johnsoniae</i> UW101(T)     | 0     | 0     | 0     | 0     | 0     | 0     | 0     |
| <i>Formosa agariphila</i> KMM 3901(T)         | 0     | 0     | 0     | 0     | 0     | 0     | 0     |
| <i>Gillisia limnaea</i> R-8282(T)             | 0     | 0     | 0     | 0     | 0     | 0     | 0     |
| <i>Gillisia</i> sp. CBA3202                   | 0     | 0     | 0     | 0     | 0     | 0     | 0     |
| <i>Gramella forsetii</i> ' KT0803             | 0     | 0     | 0     | 0     | 0     | 0     | 0     |
| <i>Imtechella halotolerans</i> K1(T)          | 0     | 0     | 0     | 0     | 0     | 0     | 0     |
| <i>Joostella marina</i> En5(T)                | 0     | 0     | 0     | 0     | 0     | 0     | 0     |
| <i>Kordia algicida</i> OT-1(T)                | 0     | 0     | 0     | 0     | 0     | 0     | 0     |
| <i>Leeuwenhoekiella blandensis</i> MED217(T)  | 0     | 0     | 0     | 0     | 0     | 0     | 0     |
| <i>Maribacter</i> sp. HTCC2170                | 0     | 0     | 0     | 0     | 0     | 0     | 0     |
| <i>Mesoflavibacter zeaxanthinifaciens</i> S86 | 0     | 0     | 0     | 0     | 0     | 0     | 0     |
| <i>Muricauda ruestringensis</i> B1(T)         | 0     | 0     | 0     | 0     | 0     | 0     | 0     |
| <i>Polaribacter irgensii</i> 23-P(T)          | 0     | 0     | 0     | 0     | 0     | 0     | 0     |
| <i>Polaribacter</i> sp. Hel1_33_49            | 0     | 0     | 0     | 0     | 0     | 0     | 0     |
| <i>Polaribacter</i> sp. Hel1_85               | 0     | 0     | 0     | 0     | 0     | 0     | 0     |
| <i>Polaribacter</i> sp. MED152                | 0     | 0     | 0     | 0     | 0     | 0     | 0     |
| <i>Psychroflexus gondwanensis</i> ACAM 44(T)  | 0     | 0     | 0     | 0     | 0     | 0     | 0     |
| <i>Psychroflexus torquis</i> 651(T)           | 0     | 0     | 0     | 0     | 0     | 0     | 0     |
| <i>Robiginitalea biformata</i> HTCC2501(T)    | 0     | 0     | 0     | 0     | 0     | 0     | 0     |
| <i>Zobellia galactanivorans</i> Dsij(T)       | 0     | 0     | 1     | 0     | 0     | 0     | 0     |
| <i>Zunogwangia profunda</i> SM-A87(T)         | 0     | 0     | 0     | 0     | 0     | 0     | 0     |

|                                               | CBM47 | CBM48 | CBM49 | CBM50 | CBM51 | CBM52 | CBM53 |
|-----------------------------------------------|-------|-------|-------|-------|-------|-------|-------|
| <i>Cellulophaga algicola</i> IC166(T)         | 1     | 4     | 0     | 5     | 0     | 0     | 0     |
| <i>Cellulophaga lytica</i> LIM-21(T)          | 0     | 1     | 0     | 3     | 0     | 0     | 0     |
| <i>Croceibacter atlanticus</i> HTCC2559(T)    | 0     | 1     | 0     | 3     | 0     | 0     | 0     |
| <i>Dokdonia donghaensis</i> MED134            | 0     | 2     | 0     | 4     | 0     | 0     | 0     |
| <i>Dokdonia</i> sp. 4H-3-7-5                  | 0     | 2     | 0     | 2     | 0     | 0     | 0     |
| <i>Flavobacteriaceae bacterium</i> S85        | 0     | 2     | 0     | 3     | 0     | 0     | 0     |
| <i>Flavobacterium johnsoniae</i> UW101(T)     | 0     | 2     | 0     | 5     | 0     | 0     | 0     |
| <i>Formosa agariphila</i> KMM 3901(T)         | 1     | 3     | 0     | 3     | 0     | 0     | 0     |
| <i>Gillisia limnaea</i> R-8282(T)             | 0     | 3     | 0     | 3     | 0     | 0     | 0     |
| <i>Gillisia</i> sp. CBA3202                   | 0     | 0     | 0     | 3     | 0     | 0     | 0     |
| <i>Gramella forsetii</i> ' KT0803             | 0     | 2     | 0     | 3     | 0     | 0     | 0     |
| <i>Imtechella halotolerans</i> K1(T)          | 0     | 1     | 0     | 2     | 0     | 0     | 0     |
| <i>Joostella marina</i> En5(T)                | 0     | 2     | 0     | 3     | 0     | 0     | 0     |
| <i>Kordia algicida</i> OT-1(T)                | 0     | 3     | 0     | 5     | 0     | 0     | 0     |
| <i>Leeuwenhoekiella blandensis</i> MED217(T)  | 0     | 2     | 0     | 3     | 0     | 0     | 0     |
| <i>Maribacter</i> sp. HTCC2170                | 0     | 2     | 0     | 4     | 0     | 0     | 0     |
| <i>Mesoflavibacter zeaxanthinifaciens</i> S86 | 0     | 2     | 0     | 3     | 0     | 0     | 0     |
| <i>Muricauda ruestringensis</i> B1(T)         | 0     | 3     | 0     | 3     | 0     | 0     | 0     |
| <i>Polaribacter irgensii</i> 23-P(T)          | 0     | 1     | 0     | 2     | 0     | 0     | 0     |
| <i>Polaribacter</i> sp. Hel1_33_49            | 0     | 3     | 0     | 3     | 0     | 0     | 0     |
| <i>Polaribacter</i> sp. Hel1_85               | 0     | 3     | 0     | 4     | 0     | 0     | 0     |
| <i>Polaribacter</i> sp. MED152                | 0     | 3     | 0     | 3     | 0     | 0     | 0     |
| <i>Psychroflexus gondwanensis</i> ACAM 44(T)  | 0     | 1     | 0     | 2     | 0     | 0     | 0     |
| <i>Psychroflexus torquis</i> 651(T)           | 0     | 2     | 0     | 2     | 0     | 0     | 0     |
| <i>Robiginitalea biformata</i> HTCC2501(T)    | 0     | 3     | 0     | 3     | 0     | 0     | 0     |
| <i>Zobellia galactanivorans</i> Dsij(T)       | 2     | 2     | 0     | 3     | 2     | 0     | 0     |
| <i>Zunogwangia profunda</i> SM-A87(T)         | 0     | 7     | 0     | 2     | 0     | 0     | 0     |

|                                               | CBM54 | CBM55 | CBM56 | CBM57 | CBM58 | CBM59 | CBM60 |
|-----------------------------------------------|-------|-------|-------|-------|-------|-------|-------|
| <i>Cellulophaga algicola</i> IC166(T)         | 0     | 0     | 0     | 0     | 0     | 0     | 0     |
| <i>Cellulophaga lytica</i> LIM-21(T)          | 0     | 0     | 0     | 0     | 0     | 0     | 0     |
| <i>Croceibacter atlanticus</i> HTCC2559(T)    | 0     | 0     | 0     | 0     | 0     | 0     | 0     |
| <i>Dokdonia donghaensis</i> MED134            | 0     | 0     | 0     | 0     | 0     | 0     | 0     |
| <i>Dokdonia</i> sp. 4H-3-7-5                  | 0     | 0     | 0     | 0     | 0     | 0     | 0     |
| <i>Flavobacteriaceae bacterium</i> S85        | 0     | 0     | 0     | 0     | 0     | 0     | 0     |
| <i>Flavobacterium johnsoniae</i> UW101(T)     | 0     | 0     | 0     | 1     | 0     | 0     | 0     |
| <i>Formosa agariphila</i> KMM 3901(T)         | 0     | 0     | 0     | 0     | 0     | 0     | 0     |
| <i>Gillisia limnaea</i> R-8282(T)             | 0     | 0     | 0     | 1     | 0     | 0     | 0     |
| <i>Gillisia</i> sp. CBA3202                   | 0     | 0     | 0     | 0     | 0     | 0     | 0     |
| <i>Gramella forsetii</i> ' KT0803             | 0     | 0     | 0     | 1     | 0     | 0     | 0     |
| <i>Imtechella halotolerans</i> K1(T)          | 0     | 0     | 0     | 0     | 0     | 0     | 0     |
| <i>Joostella marina</i> En5(T)                | 0     | 0     | 0     | 0     | 0     | 0     | 0     |
| <i>Kordia algicida</i> OT-1(T)                | 0     | 0     | 0     | 1     | 0     | 0     | 0     |
| <i>Leeuwenhoekiella blandensis</i> MED217(T)  | 0     | 0     | 0     | 0     | 0     | 0     | 0     |
| <i>Maribacter</i> sp. HTCC2170                | 0     | 0     | 0     | 3     | 0     | 0     | 0     |
| <i>Mesoflavibacter zeaxanthinifaciens</i> S86 | 0     | 0     | 0     | 0     | 0     | 0     | 0     |
| <i>Muricauda ruestringensis</i> B1(T)         | 0     | 0     | 0     | 3     | 0     | 0     | 0     |
| <i>Polaribacter irgensii</i> 23-P(T)          | 0     | 0     | 0     | 0     | 0     | 0     | 0     |
| <i>Polaribacter</i> sp. Hel1_33_49            | 0     | 0     | 0     | 0     | 0     | 0     | 0     |
| <i>Polaribacter</i> sp. Hel1_85               | 0     | 0     | 0     | 0     | 0     | 0     | 0     |
| <i>Polaribacter</i> sp. MED152                | 0     | 0     | 0     | 0     | 0     | 0     | 0     |
| <i>Psychroflexus gondwanensis</i> ACAM 44(T)  | 0     | 0     | 0     | 0     | 0     | 0     | 0     |
| <i>Psychroflexus torquis</i> 651(T)           | 0     | 0     | 0     | 0     | 0     | 0     | 0     |
| <i>Robiginitalea biformata</i> HTCC2501(T)    | 0     | 0     | 0     | 3     | 0     | 0     | 0     |
| <i>Zobellia galactanivorans</i> Dsij(T)       | 0     | 0     | 0     | 3     | 0     | 0     | 0     |
| <i>Zunogwangia profunda</i> SM-A87(T)         | 0     | 0     | 0     | 1     | 0     | 0     | 0     |

|                                               | CBM61 | CBM62 | CBM63 | CBM64 | CBM65 | CBM66 | CBM67 |
|-----------------------------------------------|-------|-------|-------|-------|-------|-------|-------|
| <i>Cellulophaga algicola</i> IC166(T)         | 0     | 0     | 0     | 0     | 0     | 0     | 0     |
| <i>Cellulophaga lytica</i> LIM-21(T)          | 0     | 0     | 0     | 0     | 0     | 0     | 0     |
| <i>Croceibacter atlanticus</i> HTCC2559(T)    | 0     | 0     | 0     | 0     | 0     | 0     | 0     |
| <i>Dokdonia donghaensis</i> MED134            | 0     | 0     | 0     | 0     | 0     | 0     | 0     |
| <i>Dokdonia</i> sp. 4H-3-7-5                  | 0     | 0     | 0     | 0     | 0     | 0     | 0     |
| <i>Flavobacteriaceae bacterium</i> S85        | 0     | 0     | 0     | 0     | 0     | 0     | 0     |
| <i>Flavobacterium johnsoniae</i> UW101(T)     | 1     | 0     | 0     | 0     | 0     | 0     | 2     |
| <i>Formosa agariphila</i> KMM 3901(T)         | 0     | 0     | 0     | 0     | 0     | 0     | 2     |
| <i>Gillisia limnaea</i> R-8282(T)             | 0     | 0     | 0     | 0     | 0     | 0     | 0     |
| <i>Gillisia</i> sp. CBA3202                   | 0     | 0     | 0     | 0     | 0     | 0     | 0     |
| <i>Gramella forsetii</i> ' KT0803             | 0     | 0     | 0     | 0     | 0     | 0     | 0     |
| <i>Imtechella halotolerans</i> K1(T)          | 0     | 0     | 0     | 0     | 0     | 0     | 0     |
| <i>Joostella marina</i> En5(T)                | 0     | 0     | 0     | 0     | 0     | 0     | 0     |
| <i>Kordia algicida</i> OT-1(T)                | 0     | 0     | 0     | 0     | 0     | 0     | 0     |
| <i>Leeuwenhoekiella blandensis</i> MED217(T)  | 1     | 0     | 0     | 0     | 0     | 0     | 1     |
| <i>Maribacter</i> sp. HTCC2170                | 0     | 0     | 0     | 0     | 0     | 0     | 1     |
| <i>Mesoflavibacter zeaxanthinifaciens</i> S86 | 0     | 0     | 0     | 0     | 0     | 0     | 0     |
| <i>Muricauda ruestringensis</i> B1(T)         | 0     | 0     | 0     | 0     | 0     | 0     | 0     |
| <i>Polaribacter irgensii</i> 23-P(T)          | 0     | 0     | 0     | 0     | 0     | 0     | 0     |
| <i>Polaribacter</i> sp. Hel1_33_49            | 0     | 0     | 0     | 0     | 0     | 0     | 0     |
| <i>Polaribacter</i> sp. Hel1_85               | 0     | 0     | 0     | 0     | 0     | 0     | 0     |
| <i>Polaribacter</i> sp. MED152                | 0     | 0     | 0     | 0     | 0     | 0     | 0     |
| <i>Psychroflexus gondwanensis</i> ACAM 44(T)  | 0     | 0     | 0     | 0     | 0     | 0     | 0     |
| <i>Psychroflexus torquis</i> 651(T)           | 0     | 0     | 0     | 0     | 0     | 0     | 0     |
| <i>Robiginitalea biformata</i> HTCC2501(T)    | 0     | 0     | 0     | 0     | 0     | 0     | 4     |
| <i>Zobellia galactanivorans</i> Dsij(T)       | 0     | 0     | 0     | 0     | 0     | 0     | 2     |
| <i>Zunogwangia profunda</i> SM-A87(T)         | 0     | 0     | 0     | 0     | 0     | 0     | 1     |



|                                               | CBM68 | CBM69 | CE1 | CE2 | CE3 | CE4 | CE5 |
|-----------------------------------------------|-------|-------|-----|-----|-----|-----|-----|
| <i>Cellulophaga algicola</i> IC166(T)         | 0     | 0     | 3   | 0   | 0   | 1   | 0   |
| <i>Cellulophaga lytica</i> LIM-21(T)          | 0     | 0     | 2   | 1   | 0   | 1   | 0   |
| <i>Croceibacter atlanticus</i> HTCC2559(T)    | 0     | 0     | 1   | 0   | 0   | 2   | 0   |
| <i>Dokdonia donghaensis</i> MED134            | 0     | 0     | 1   | 0   | 0   | 1   | 0   |
| <i>Dokdonia</i> sp. 4H-3-7-5                  | 0     | 0     | 0   | 0   | 0   | 0   | 0   |
| <i>Flavobacteriaceae bacterium</i> S85        | 0     | 0     | 2   | 0   | 0   | 2   | 0   |
| <i>Flavobacterium johnsoniae</i> UW101(T)     | 0     | 0     | 5   | 1   | 0   | 5   | 0   |
| <i>Formosa agariphila</i> KMM 3901(T)         | 0     | 0     | 5   | 0   | 0   | 1   | 0   |
| <i>Gillisia limnaea</i> R-8282(T)             | 0     | 0     | 2   | 0   | 0   | 4   | 0   |
| <i>Gillisia</i> sp. CBA3202                   | 0     | 0     | 2   | 0   | 0   | 3   | 0   |
| <i>Gramella forsetii</i> ' KT0803             | 0     | 0     | 3   | 0   | 0   | 4   | 0   |
| <i>Imtechella halotolerans</i> K1(T)          | 0     | 0     | 3   | 0   | 0   | 1   | 0   |
| <i>Joostella marina</i> En5(T)                | 0     | 0     | 2   | 0   | 0   | 1   | 0   |
| <i>Kordia algicida</i> OT-1(T)                | 0     | 0     | 4   | 0   | 0   | 3   | 0   |
| <i>Leeuwenhoekiella blandensis</i> MED217(T)  | 0     | 0     | 4   | 0   | 0   | 1   | 0   |
| <i>Maribacter</i> sp. HTCC2170                | 0     | 0     | 3   | 0   | 0   | 1   | 0   |
| <i>Mesoflavibacter zeaxanthinifaciens</i> S86 | 0     | 0     | 2   | 0   | 0   | 1   | 0   |
| <i>Muricauda ruestringensis</i> B1(T)         | 0     | 0     | 5   | 0   | 0   | 2   | 0   |
| <i>Polaribacter irgensii</i> 23-P(T)          | 0     | 0     | 1   | 0   | 0   | 1   | 0   |
| <i>Polaribacter</i> sp. Hel1_33_49            | 0     | 0     | 2   | 0   | 0   | 0   | 0   |
| <i>Polaribacter</i> sp. Hel1_85               | 0     | 0     | 3   | 0   | 0   | 1   | 0   |
| <i>Polaribacter</i> sp. MED152                | 0     | 0     | 2   | 0   | 0   | 1   | 0   |
| <i>Psychroflexus gondwanensis</i> ACAM 44(T)  | 0     | 0     | 0   | 0   | 0   | 1   | 0   |
| <i>Psychroflexus torquis</i> 651(T)           | 0     | 0     | 0   | 0   | 0   | 1   | 0   |
| <i>Robiginitalea biformata</i> HTCC2501(T)    | 0     | 0     | 3   | 0   | 0   | 0   | 0   |
| <i>Zobellia galactanivorans</i> Dsij(T)       | 0     | 0     | 4   | 0   | 0   | 3   | 0   |
| <i>Zunogwangia profunda</i> SM-A87(T)         | 0     | 0     | 7   | 0   | 0   | 3   | 0   |

|                                               | CE6 | CE7 | CE8 | CE9 | CE10 | CE11 | CE12 |
|-----------------------------------------------|-----|-----|-----|-----|------|------|------|
| <i>Cellulophaga algicola</i> IC166(T)         | 1   | 0   | 0   | 0   | 0    | 1    | 0    |
| <i>Cellulophaga lytica</i> LIM-21(T)          | 1   | 0   | 0   | 0   | 0    | 1    | 0    |
| <i>Croceibacter atlanticus</i> HTCC2559(T)    | 0   | 0   | 0   | 0   | 0    | 1    | 0    |
| <i>Dokdonia donghaensis</i> MED134            | 0   | 0   | 0   | 0   | 0    | 1    | 0    |
| <i>Dokdonia</i> sp. 4H-3-7-5                  | 0   | 0   | 0   | 0   | 0    | 0    | 0    |
| <i>Flavobacteriaceae bacterium</i> S85        | 1   | 0   | 0   | 0   | 0    | 1    | 0    |
| <i>Flavobacterium johnsoniae</i> UW101(T)     | 1   | 0   | 2   | 1   | 0    | 1    | 2    |
| <i>Formosa agariphila</i> KMM 3901(T)         | 0   | 0   | 0   | 0   | 0    | 1    | 0    |
| <i>Gillisia limnaea</i> R-8282(T)             | 0   | 0   | 0   | 0   | 0    | 1    | 0    |
| <i>Gillisia</i> sp. CBA3202                   | 0   | 0   | 0   | 0   | 0    | 1    | 0    |
| <i>Gramella forsetii</i> ' KT0803             | 0   | 0   | 0   | 0   | 0    | 1    | 0    |
| <i>Imtechella halotolerans</i> K1(T)          | 1   | 0   | 0   | 1   | 0    | 1    | 0    |
| <i>Joostella marina</i> En5(T)                | 0   | 0   | 2   | 0   | 0    | 1    | 3    |
| <i>Kordia algicida</i> OT-1(T)                | 0   | 0   | 0   | 0   | 0    | 1    | 0    |
| <i>Leeuwenhoekiella blandensis</i> MED217(T)  | 0   | 0   | 3   | 0   | 0    | 1    | 3    |
| <i>Maribacter</i> sp. HTCC2170                | 0   | 0   | 0   | 0   | 0    | 1    | 0    |
| <i>Mesoflavibacter zeaxanthinifaciens</i> S86 | 0   | 0   | 1   | 0   | 0    | 1    | 3    |
| <i>Muricauda ruestringensis</i> B1(T)         | 0   | 0   | 0   | 0   | 0    | 1    | 0    |
| <i>Polaribacter irgensii</i> 23-P(T)          | 0   | 0   | 0   | 0   | 0    | 1    | 0    |
| <i>Polaribacter</i> sp. Hel1_33_49            | 0   | 0   | 0   | 0   | 0    | 1    | 0    |
| <i>Polaribacter</i> sp. Hel1_85               | 0   | 0   | 0   | 0   | 0    | 1    | 0    |
| <i>Polaribacter</i> sp. MED152                | 0   | 0   | 0   | 0   | 0    | 1    | 0    |
| <i>Psychroflexus gondwanensis</i> ACAM 44(T)  | 0   | 0   | 0   | 0   | 0    | 1    | 0    |
| <i>Psychroflexus torquis</i> 651(T)           | 0   | 0   | 0   | 0   | 0    | 1    | 0    |
| <i>Robiginitalea biformata</i> HTCC2501(T)    | 0   | 0   | 0   | 0   | 0    | 1    | 0    |
| <i>Zobellia galactanivorans</i> Dsij(T)       | 1   | 1   | 0   | 1   | 0    | 1    | 0    |
| <i>Zunogwangia profunda</i> SM-A87(T)         | 1   | 0   | 0   | 0   | 0    | 1    | 0    |

|                                               | CE13 | CE14 | CE15 | CE16 | GH1 | GH2 | GH3 |
|-----------------------------------------------|------|------|------|------|-----|-----|-----|
| <i>Cellulophaga algicola</i> IC166(T)         | 0    | 2    | 0    | 0    | 1   | 6   | 4   |
| <i>Cellulophaga lytica</i> LIM-21(T)          | 0    | 2    | 0    | 0    | 0   | 5   | 5   |
| <i>Croceibacter atlanticus</i> HTCC2559(T)    | 0    | 2    | 0    | 0    | 0   | 0   | 1   |
| <i>Dokdonia donghaensis</i> MED134            | 0    | 2    | 0    | 0    | 0   | 1   | 1   |
| <i>Dokdonia</i> sp. 4H-3-7-5                  | 0    | 0    | 0    | 0    | 0   | 0   | 1   |
| <i>Flavobacteriaceae bacterium</i> S85        | 0    | 1    | 0    | 0    | 1   | 20  | 7   |
| <i>Flavobacterium johnsoniae</i> UW101(T)     | 0    | 2    | 0    | 0    | 1   | 15  | 13  |
| <i>Formosa agariphila</i> KMM 3901(T)         | 0    | 2    | 0    | 0    | 1   | 17  | 7   |
| <i>Gillisia limnaea</i> R-8282(T)             | 0    | 4    | 0    | 0    | 0   | 1   | 4   |
| <i>Gillisia</i> sp. CBA3202                   | 0    | 2    | 0    | 0    | 0   | 0   | 3   |
| <i>Gramella forsetii</i> ' KT0803             | 0    | 3    | 0    | 0    | 0   | 6   | 3   |
| <i>Imtechella halotolerans</i> K1(T)          | 0    | 2    | 1    | 0    | 0   | 4   | 2   |
| <i>Joostella marina</i> En5(T)                | 0    | 2    | 0    | 0    | 0   | 9   | 4   |
| <i>Kordia algicida</i> OT-1(T)                | 0    | 2    | 0    | 0    | 0   | 5   | 4   |
| <i>Leeuwenhoekiella blandensis</i> MED217(T)  | 0    | 2    | 0    | 0    | 0   | 11  | 7   |
| <i>Maribacter</i> sp. HTCC2170                | 0    | 3    | 1    | 0    | 0   | 4   | 3   |
| <i>Mesoflavibacter zeaxanthinifaciens</i> S86 | 0    | 2    | 0    | 0    | 0   | 5   | 6   |
| <i>Muricauda ruestringensis</i> B1(T)         | 0    | 3    | 0    | 0    | 0   | 1   | 4   |
| <i>Polaribacter irgensii</i> 23-P(T)          | 0    | 4    | 0    | 0    | 0   | 1   | 2   |
| <i>Polaribacter</i> sp. Hel1_33_49            | 0    | 2    | 0    | 0    | 0   | 3   | 5   |
| <i>Polaribacter</i> sp. Hel1_85               | 0    | 2    | 0    | 0    | 1   | 6   | 4   |
| <i>Polaribacter</i> sp. MED152                | 0    | 2    | 0    | 0    | 0   | 0   | 1   |
| <i>Psychroflexus gondwanensis</i> ACAM 44(T)  | 0    | 2    | 0    | 0    | 0   | 0   | 2   |
| <i>Psychroflexus torquis</i> 651(T)           | 0    | 3    | 0    | 0    | 0   | 1   | 2   |
| <i>Robiginitalea biformata</i> HTCC2501(T)    | 0    | 2    | 0    | 0    | 0   | 1   | 4   |
| <i>Zobellia galactanivorans</i> Dsj(T)        | 0    | 2    | 1    | 0    | 1   | 10  | 5   |
| <i>Zunogwangia profunda</i> SM-A87(T)         | 0    | 2    | 1    | 0    | 1   | 12  | 10  |

|                                               | GH4 | GH5 | GH6 | GH7 | GH8 | GH9 | GH10 |
|-----------------------------------------------|-----|-----|-----|-----|-----|-----|------|
| <i>Cellulophaga algicola</i> IC166(T)         | 0   | 4   | 0   | 0   | 0   | 0   | 4    |
| <i>Cellulophaga lytica</i> LIM-21(T)          | 0   | 3   | 0   | 0   | 0   | 0   | 0    |
| <i>Croceibacter atlanticus</i> HTCC2559(T)    | 0   | 0   | 0   | 0   | 0   | 0   | 0    |
| <i>Dokdonia donghaensis</i> MED134            | 0   | 2   | 0   | 0   | 0   | 0   | 0    |
| <i>Dokdonia</i> sp. 4H-3-7-5                  | 0   | 1   | 0   | 0   | 0   | 0   | 0    |
| <i>Flavobacteriaceae bacterium</i> S85        | 0   | 3   | 0   | 0   | 0   | 0   | 0    |
| <i>Flavobacterium johnsoniae</i> UW101(T)     | 0   | 4   | 0   | 0   | 2   | 0   | 3    |
| <i>Formosa agariphila</i> KMM 3901(T)         | 0   | 3   | 0   | 0   | 0   | 0   | 0    |
| <i>Gillisia limnaea</i> R-8282(T)             | 0   | 1   | 0   | 0   | 0   | 0   | 0    |
| <i>Gillisia</i> sp. CBA3202                   | 0   | 0   | 0   | 0   | 0   | 0   | 0    |
| <i>Gramella forsetii</i> ' KT0803             | 0   | 0   | 0   | 0   | 0   | 0   | 0    |
| <i>Imtechella halotolerans</i> K1(T)          | 0   | 0   | 0   | 0   | 0   | 0   | 0    |
| <i>Joostella marina</i> En5(T)                | 0   | 1   | 0   | 0   | 0   | 0   | 0    |
| <i>Kordia algicida</i> OT-1(T)                | 0   | 1   | 0   | 0   | 0   | 0   | 0    |
| <i>Leeuwenhoekiella blandensis</i> MED217(T)  | 0   | 4   | 0   | 0   | 0   | 0   | 0    |
| <i>Maribacter</i> sp. HTCC2170                | 1   | 2   | 0   | 0   | 0   | 2   | 0    |
| <i>Mesoflavibacter zeaxanthinifaciens</i> S86 | 0   | 1   | 0   | 0   | 0   | 0   | 1    |
| <i>Muricauda ruestringensis</i> B1(T)         | 0   | 0   | 0   | 0   | 0   | 0   | 0    |
| <i>Polaribacter irgensii</i> 23-P(T)          | 0   | 2   | 0   | 0   | 0   | 0   | 0    |
| <i>Polaribacter</i> sp. Hel1_33_49            | 0   | 1   | 0   | 0   | 0   | 0   | 0    |
| <i>Polaribacter</i> sp. Hel1_85               | 0   | 1   | 0   | 0   | 0   | 0   | 0    |
| <i>Polaribacter</i> sp. MED152                | 0   | 2   | 0   | 0   | 0   | 0   | 0    |
| <i>Psychroflexus gondwanensis</i> ACAM 44(T)  | 0   | 0   | 0   | 0   | 0   | 0   | 0    |
| <i>Psychroflexus torquis</i> 651(T)           | 0   | 1   | 0   | 0   | 0   | 0   | 0    |
| <i>Robiginitalea biformata</i> HTCC2501(T)    | 0   | 0   | 0   | 0   | 0   | 0   | 0    |
| <i>Zobellia galactanivorans</i> Dsij(T)       | 0   | 3   | 0   | 0   | 0   | 0   | 3    |
| <i>Zunogwangia profunda</i> SM-A87(T)         | 0   | 3   | 0   | 0   | 0   | 0   | 3    |

|                                               | GH11 | GH12 | GH13 | GH14 | GH15 | GH16 | GH17 |
|-----------------------------------------------|------|------|------|------|------|------|------|
| <i>Cellulophaga algicola</i> IC166(T)         | 1    | 0    | 6    | 0    | 2    | 8    | 0    |
| <i>Cellulophaga lytica</i> LIM-21(T)          | 0    | 0    | 3    | 0    | 1    | 8    | 0    |
| <i>Croceibacter atlanticus</i> HTCC2559(T)    | 0    | 0    | 5    | 0    | 0    | 0    | 0    |
| <i>Dokdonia donghaensis</i> MED134            | 0    | 0    | 4    | 0    | 0    | 1    | 0    |
| <i>Dokdonia</i> sp. 4H-3-7-5                  | 0    | 0    | 1    | 0    | 0    | 1    | 0    |
| <i>Flavobacteriaceae bacterium</i> S85        | 0    | 0    | 6    | 0    | 0    | 19   | 0    |
| <i>Flavobacterium johnsoniae</i> UW101(T)     | 0    | 0    | 8    | 0    | 0    | 4    | 0    |
| <i>Formosa agariphila</i> KMM 3901(T)         | 0    | 0    | 5    | 0    | 1    | 9    | 2    |
| <i>Gillisia limnaea</i> R-8282(T)             | 0    | 0    | 7    | 0    | 1    | 4    | 0    |
| <i>Gillisia</i> sp. CBA3202                   | 0    | 0    | 3    | 0    | 0    | 2    | 0    |
| <i>Gramella forsetii</i> ' KT0803             | 0    | 0    | 4    | 0    | 1    | 7    | 0    |
| <i>Imtechella halotolerans</i> K1(T)          | 0    | 0    | 3    | 0    | 0    | 0    | 0    |
| <i>Joostella marina</i> En5(T)                | 0    | 0    | 4    | 0    | 1    | 4    | 0    |
| <i>Kordia algicida</i> OT-1(T)                | 0    | 0    | 7    | 0    | 0    | 1    | 4    |
| <i>Leeuwenhoekiella blandensis</i> MED217(T)  | 0    | 0    | 7    | 0    | 2    | 3    | 0    |
| <i>Maribacter</i> sp. HTCC2170                | 0    | 0    | 3    | 0    | 1    | 4    | 0    |
| <i>Mesoflavibacter zeaxanthinifaciens</i> S86 | 0    | 0    | 6    | 0    | 1    | 2    | 0    |
| <i>Muricauda ruestringensis</i> B1(T)         | 0    | 0    | 3    | 0    | 1    | 1    | 0    |
| <i>Polaribacter irgensii</i> 23-P(T)          | 0    | 0    | 1    | 0    | 0    | 3    | 1    |
| <i>Polaribacter</i> sp. Hel1_33_49            | 0    | 0    | 6    | 0    | 0    | 6    | 2    |
| <i>Polaribacter</i> sp. Hel1_85               | 0    | 0    | 6    | 0    | 0    | 1    | 2    |
| <i>Polaribacter</i> sp. MED152                | 0    | 0    | 8    | 0    | 0    | 3    | 1    |
| <i>Psychroflexus gondwanensis</i> ACAM 44(T)  | 0    | 0    | 3    | 0    | 1    | 2    | 3    |
| <i>Psychroflexus torquis</i> 651(T)           | 0    | 0    | 5    | 0    | 1    | 3    | 3    |
| <i>Robiginitalea biformata</i> HTCC2501(T)    | 0    | 0    | 8    | 0    | 1    | 1    | 0    |
| <i>Zobellia galactanivorans</i> Dsij(T)       | 0    | 0    | 6    | 0    | 2    | 15   | 0    |
| <i>Zunogwangia profunda</i> SM-A87(T)         | 0    | 0    | 5    | 0    | 3    | 4    | 0    |

|                                               | GH18 | GH19 | GH20 | GH21 | GH22 | GH23 | GH24 |
|-----------------------------------------------|------|------|------|------|------|------|------|
| <i>Cellulophaga algicola</i> IC166(T)         | 0    | 2    | 1    | 0    | 0    | 2    | 0    |
| <i>Cellulophaga lytica</i> LIM-21(T)          | 0    | 0    | 2    | 0    | 0    | 2    | 0    |
| <i>Croceibacter atlanticus</i> HTCC2559(T)    | 0    | 0    | 0    | 0    | 0    | 2    | 0    |
| <i>Dokdonia donghaensis</i> MED134            | 0    | 0    | 1    | 0    | 0    | 2    | 0    |
| <i>Dokdonia</i> sp. 4H-3-7-5                  | 0    | 0    | 1    | 0    | 0    | 2    | 0    |
| <i>Flavobacteriaceae bacterium</i> S85        | 0    | 0    | 0    | 0    | 0    | 2    | 0    |
| <i>Flavobacterium johnsoniae</i> UW101(T)     | 4    | 3    | 4    | 0    | 0    | 1    | 0    |
| <i>Formosa agariphila</i> KMM 3901(T)         | 0    | 0    | 1    | 0    | 0    | 2    | 0    |
| <i>Gillisia limnaea</i> R-8282(T)             | 0    | 0    | 0    | 0    | 0    | 2    | 0    |
| <i>Gillisia</i> sp. CBA3202                   | 0    | 0    | 0    | 0    | 0    | 2    | 0    |
| <i>Gramella forsetii</i> ' KT0803             | 0    | 0    | 0    | 0    | 0    | 2    | 0    |
| <i>Imtechella halotolerans</i> K1(T)          | 0    | 0    | 3    | 0    | 0    | 2    | 0    |
| <i>Joostella marina</i> En5(T)                | 0    | 0    | 4    | 0    | 0    | 2    | 0    |
| <i>Kordia algicida</i> OT-1(T)                | 0    | 1    | 1    | 0    | 0    | 2    | 0    |
| <i>Leeuwenhoekiella blandensis</i> MED217(T)  | 0    | 0    | 2    | 0    | 0    | 2    | 0    |
| <i>Maribacter</i> sp. HTCC2170                | 2    | 0    | 3    | 0    | 0    | 2    | 0    |
| <i>Mesoflavibacter zeaxanthinifaciens</i> S86 | 0    | 0    | 2    | 0    | 0    | 2    | 0    |
| <i>Muricauda ruestringensis</i> B1(T)         | 0    | 0    | 2    | 0    | 0    | 2    | 0    |
| <i>Polaribacter irgensii</i> 23-P(T)          | 0    | 0    | 0    | 0    | 0    | 2    | 0    |
| <i>Polaribacter</i> sp. Hel1_33_49            | 0    | 0    | 2    | 0    | 0    | 3    | 0    |
| <i>Polaribacter</i> sp. Hel1_85               | 0    | 0    | 0    | 0    | 0    | 2    | 0    |
| <i>Polaribacter</i> sp. MED152                | 0    | 0    | 2    | 0    | 0    | 2    | 0    |
| <i>Psychroflexus gondwanensis</i> ACAM 44(T)  | 0    | 0    | 0    | 0    | 0    | 3    | 0    |
| <i>Psychroflexus torquis</i> 651(T)           | 0    | 0    | 0    | 0    | 0    | 3    | 0    |
| <i>Robiginitalea biformata</i> HTCC2501(T)    | 0    | 0    | 1    | 0    | 0    | 3    | 0    |
| <i>Zobellia galactanivorans</i> Dsij(T)       | 1    | 0    | 4    | 0    | 0    | 2    | 0    |
| <i>Zunogwangia profunda</i> SM-A87(T)         | 2    | 0    | 3    | 0    | 0    | 3    | 0    |

|                                               | GH25 | GH26 | GH27 | GH28 | GH29 | GH30 | GH31 |
|-----------------------------------------------|------|------|------|------|------|------|------|
| <i>Cellulophaga algicola</i> IC166(T)         | 0    | 3    | 0    | 2    | 5    | 0    | 1    |
| <i>Cellulophaga lytica</i> LIM-21(T)          | 0    | 0    | 0    | 1    | 3    | 0    | 0    |
| <i>Croceibacter atlanticus</i> HTCC2559(T)    | 0    | 0    | 0    | 0    | 0    | 0    | 0    |
| <i>Dokdonia donghaensis</i> MED134            | 0    | 0    | 0    | 0    | 0    | 0    | 1    |
| <i>Dokdonia</i> sp. 4H-3-7-5                  | 0    | 0    | 0    | 0    | 0    | 0    | 1    |
| <i>Flavobacteriaceae bacterium</i> S85        | 0    | 1    | 0    | 2    | 9    | 0    | 1    |
| <i>Flavobacterium johnsoniae</i> UW101(T)     | 1    | 3    | 2    | 7    | 2    | 4    | 3    |
| <i>Formosa agariphila</i> KMM 3901(T)         | 1    | 3    | 0    | 2    | 5    | 2    | 3    |
| <i>Gillisia limnaea</i> R-8282(T)             | 0    | 0    | 0    | 0    | 0    | 0    | 1    |
| <i>Gillisia</i> sp. CBA3202                   | 0    | 0    | 0    | 0    | 0    | 0    | 1    |
| <i>Gramella forsetii</i> ' KT0803             | 0    | 0    | 0    | 0    | 1    | 0    | 1    |
| <i>Imtechella halotolerans</i> K1(T)          | 1    | 0    | 1    | 0    | 2    | 0    | 1    |
| <i>Joostella marina</i> En5(T)                | 0    | 0    | 1    | 3    | 7    | 0    | 2    |
| <i>Kordia algicida</i> OT-1(T)                | 1    | 0    | 0    | 0    | 0    | 1    | 2    |
| <i>Leeuwenhoekiella blandensis</i> MED217(T)  | 0    | 0    | 0    | 5    | 3    | 1    | 2    |
| <i>Maribacter</i> sp. HTCC2170                | 0    | 0    | 0    | 0    | 7    | 0    | 1    |
| <i>Mesoflavibacter zeaxanthinifaciens</i> S86 | 0    | 0    | 0    | 4    | 8    | 0    | 2    |
| <i>Muricauda ruestringensis</i> B1(T)         | 0    | 0    | 0    | 0    | 2    | 0    | 1    |
| <i>Polaribacter irgensii</i> 23-P(T)          | 0    | 0    | 0    | 0    | 0    | 1    | 1    |
| <i>Polaribacter</i> sp. Hel1_33_49            | 0    | 2    | 0    | 0    | 0    | 2    | 2    |
| <i>Polaribacter</i> sp. Hel1_85               | 1    | 0    | 0    | 0    | 4    | 2    | 2    |
| <i>Polaribacter</i> sp. MED152                | 0    | 0    | 0    | 0    | 0    | 2    | 2    |
| <i>Psychroflexus gondwanensis</i> ACAM 44(T)  | 0    | 1    | 0    | 0    | 0    | 1    | 0    |
| <i>Psychroflexus torquis</i> 651(T)           | 0    | 1    | 0    | 0    | 0    | 1    | 1    |
| <i>Robiginitalea biformata</i> HTCC2501(T)    | 0    | 0    | 0    | 0    | 0    | 0    | 1    |
| <i>Zobellia galactanivorans</i> Dsij(T)       | 0    | 0    | 1    | 2    | 20   | 1    | 2    |
| <i>Zunogwangia profunda</i> SM-A87(T)         | 0    | 3    | 0    | 1    | 4    | 6    | 3    |

|                                               | GH32 | GH33 | GH34 | GH35 | GH36 | GH37 | GH38 |
|-----------------------------------------------|------|------|------|------|------|------|------|
| <i>Cellulophaga algicola</i> IC166(T)         | 0    | 0    | 0    | 0    | 1    | 2    | 0    |
| <i>Cellulophaga lytica</i> LIM-21(T)          | 0    | 0    | 0    | 0    | 0    | 1    | 0    |
| <i>Croceibacter atlanticus</i> HTCC2559(T)    | 0    | 0    | 0    | 0    | 0    | 0    | 0    |
| <i>Dokdonia donghaensis</i> MED134            | 1    | 0    | 0    | 0    | 0    | 1    | 0    |
| <i>Dokdonia</i> sp. 4H-3-7-5                  | 0    | 0    | 0    | 0    | 0    | 0    | 0    |
| <i>Flavobacteriaceae bacterium</i> S85        | 0    | 0    | 0    | 0    | 1    | 1    | 0    |
| <i>Flavobacterium johnsoniae</i> UW101(T)     | 2    | 2    | 0    | 0    | 2    | 2    | 0    |
| <i>Formosa agariphila</i> KMM 3901(T)         | 0    | 0    | 0    | 0    | 0    | 1    | 0    |
| <i>Gillisia limnaea</i> R-8282(T)             | 4    | 0    | 0    | 0    | 0    | 1    | 0    |
| <i>Gillisia</i> sp. CBA3202                   | 0    | 0    | 0    | 0    | 0    | 0    | 0    |
| <i>Gramella forsetii</i> ' KT0803             | 1    | 0    | 0    | 0    | 0    | 3    | 0    |
| <i>Imtechella halotolerans</i> K1(T)          | 0    | 1    | 0    | 0    | 1    | 1    | 0    |
| <i>Joostella marina</i> En5(T)                | 4    | 0    | 0    | 0    | 1    | 0    | 0    |
| <i>Kordia algicida</i> OT-1(T)                | 0    | 0    | 0    | 0    | 0    | 0    | 0    |
| <i>Leeuwenhoekiella blandensis</i> MED217(T)  | 3    | 1    | 0    | 1    | 0    | 1    | 0    |
| <i>Maribacter</i> sp. HTCC2170                | 1    | 2    | 0    | 0    | 1    | 0    | 1    |
| <i>Mesoflavibacter zeaxanthinifaciens</i> S86 | 2    | 2    | 0    | 1    | 0    | 2    | 0    |
| <i>Muricauda ruestringensis</i> B1(T)         | 1    | 1    | 0    | 0    | 0    | 0    | 0    |
| <i>Polaribacter irgensii</i> 23-P(T)          | 0    | 0    | 0    | 0    | 0    | 0    | 0    |
| <i>Polaribacter</i> sp. Hel1_33_49            | 0    | 0    | 0    | 0    | 0    | 0    | 0    |
| <i>Polaribacter</i> sp. Hel1_85               | 1    | 0    | 0    | 0    | 0    | 0    | 0    |
| <i>Polaribacter</i> sp. MED152                | 0    | 0    | 0    | 0    | 0    | 1    | 0    |
| <i>Psychroflexus gondwanensis</i> ACAM 44(T)  | 0    | 0    | 0    | 0    | 0    | 0    | 0    |
| <i>Psychroflexus torquis</i> 651(T)           | 0    | 0    | 0    | 0    | 0    | 2    | 0    |
| <i>Robiginitalea biformata</i> HTCC2501(T)    | 1    | 0    | 0    | 0    | 0    | 0    | 0    |
| <i>Zobellia galactanivorans</i> Dsij(T)       | 0    | 1    | 0    | 0    | 4    | 3    | 0    |
| <i>Zunogwangia profunda</i> SM-A87(T)         | 5    | 1    | 0    | 1    | 0    | 1    | 0    |



|                                               | GH39 | GH40 | GH41 | GH42 | GH43 | GH44 | GH45 |
|-----------------------------------------------|------|------|------|------|------|------|------|
| <i>Cellulophaga algicola</i> IC166(T)         | 0    | 0    | 0    | 0    | 4    | 0    | 0    |
| <i>Cellulophaga lytica</i> LIM-21(T)          | 0    | 0    | 0    | 0    | 3    | 0    | 0    |
| <i>Croceibacter atlanticus</i> HTCC2559(T)    | 0    | 0    | 0    | 0    | 0    | 0    | 0    |
| <i>Dokdonia donghaensis</i> MED134            | 0    | 0    | 0    | 0    | 0    | 0    | 0    |
| <i>Dokdonia</i> sp. 4H-3-7-5                  | 0    | 0    | 0    | 0    | 0    | 0    | 0    |
| <i>Flavobacteriaceae bacterium</i> S85        | 0    | 0    | 0    | 2    | 9    | 0    | 0    |
| <i>Flavobacterium johnsoniae</i> UW101(T)     | 1    | 0    | 0    | 0    | 11   | 0    | 0    |
| <i>Formosa agariphila</i> KMM 3901(T)         | 3    | 0    | 0    | 0    | 7    | 0    | 0    |
| <i>Gillisia limnaea</i> R-8282(T)             | 0    | 0    | 0    | 0    | 5    | 0    | 0    |
| <i>Gillisia</i> sp. CBA3202                   | 0    | 0    | 0    | 0    | 1    | 0    | 0    |
| <i>Gramella forsetii</i> ' KT0803             | 0    | 0    | 0    | 0    | 6    | 0    | 0    |
| <i>Imtechella halotolerans</i> K1(T)          | 0    | 0    | 0    | 0    | 1    | 0    | 0    |
| <i>Joostella marina</i> En5(T)                | 0    | 0    | 0    | 0    | 11   | 0    | 0    |
| <i>Kordia algicida</i> OT-1(T)                | 0    | 0    | 0    | 0    | 1    | 0    | 0    |
| <i>Leeuwenhoekiella blandensis</i> MED217(T)  | 1    | 0    | 0    | 0    | 18   | 0    | 0    |
| <i>Maribacter</i> sp. HTCC2170                | 0    | 0    | 0    | 0    | 4    | 0    | 0    |
| <i>Mesoflavibacter zeaxanthinifaciens</i> S86 | 0    | 0    | 0    | 1    | 6    | 0    | 0    |
| <i>Muricauda ruestringensis</i> B1(T)         | 0    | 0    | 0    | 0    | 3    | 0    | 0    |
| <i>Polaribacter irgensii</i> 23-P(T)          | 0    | 0    | 0    | 0    | 0    | 0    | 0    |
| <i>Polaribacter</i> sp. Hel1_33_49            | 0    | 0    | 0    | 0    | 0    | 0    | 0    |
| <i>Polaribacter</i> sp. Hel1_85               | 1    | 0    | 0    | 0    | 4    | 0    | 0    |
| <i>Polaribacter</i> sp. MED152                | 0    | 0    | 0    | 0    | 0    | 0    | 0    |
| <i>Psychroflexus gondwanensis</i> ACAM 44(T)  | 0    | 0    | 0    | 0    | 0    | 0    | 0    |
| <i>Psychroflexus torquis</i> 651(T)           | 0    | 0    | 0    | 0    | 0    | 0    | 0    |
| <i>Robiginitalea biformata</i> HTCC2501(T)    | 0    | 0    | 0    | 0    | 0    | 0    | 0    |
| <i>Zobellia galactanivorans</i> Dsij(T)       | 0    | 0    | 0    | 1    | 7    | 0    | 0    |
| <i>Zunogwangia profunda</i> SM-A87(T)         | 0    | 0    | 0    | 0    | 18   | 0    | 0    |

|                                               | GH46 | GH47 | GH48 | GH49 | GH50 | GH51 | GH52 |
|-----------------------------------------------|------|------|------|------|------|------|------|
| <i>Cellulophaga algicola</i> IC166(T)         | 0    | 0    | 0    | 0    | 0    | 0    | 0    |
| <i>Cellulophaga lytica</i> LIM-21(T)          | 0    | 0    | 0    | 0    | 0    | 0    | 0    |
| <i>Croceibacter atlanticus</i> HTCC2559(T)    | 0    | 0    | 0    | 0    | 0    | 0    | 0    |
| <i>Dokdonia donghaensis</i> MED134            | 0    | 0    | 0    | 0    | 0    | 0    | 0    |
| <i>Dokdonia</i> sp. 4H-3-7-5                  | 0    | 0    | 0    | 0    | 0    | 0    | 0    |
| <i>Flavobacteriaceae bacterium</i> S85        | 0    | 0    | 0    | 0    | 0    | 0    | 0    |
| <i>Flavobacterium johnsoniae</i> UW101(T)     | 0    | 0    | 0    | 0    | 1    | 2    | 0    |
| <i>Formosa agariphila</i> KMM 3901(T)         | 0    | 0    | 0    | 0    | 0    | 0    | 0    |
| <i>Gillisia limnaea</i> R-8282(T)             | 0    | 0    | 0    | 0    | 0    | 0    | 0    |
| <i>Gillisia</i> sp. CBA3202                   | 0    | 0    | 0    | 0    | 0    | 0    | 0    |
| <i>Gramella forsetii</i> ' KT0803             | 0    | 0    | 0    | 0    | 0    | 1    | 0    |
| <i>Imtechella halotolerans</i> K1(T)          | 0    | 0    | 0    | 0    | 0    | 0    | 0    |
| <i>Joostella marina</i> En5(T)                | 0    | 0    | 0    | 0    | 0    | 2    | 0    |
| <i>Kordia algicida</i> OT-1(T)                | 0    | 0    | 0    | 0    | 0    | 0    | 0    |
| <i>Leeuwenhoekiella blandensis</i> MED217(T)  | 0    | 0    | 0    | 0    | 0    | 3    | 0    |
| <i>Maribacter</i> sp. HTCC2170                | 0    | 0    | 0    | 0    | 0    | 0    | 0    |
| <i>Mesoflavibacter zeaxanthinifaciens</i> S86 | 0    | 0    | 0    | 0    | 0    | 2    | 0    |
| <i>Muricauda ruestringensis</i> B1(T)         | 0    | 0    | 0    | 0    | 0    | 1    | 0    |
| <i>Polaribacter irgensii</i> 23-P(T)          | 0    | 0    | 0    | 0    | 0    | 0    | 0    |
| <i>Polaribacter</i> sp. Hel1_33_49            | 0    | 0    | 0    | 0    | 0    | 0    | 0    |
| <i>Polaribacter</i> sp. Hel1_85               | 0    | 0    | 0    | 0    | 0    | 0    | 0    |
| <i>Polaribacter</i> sp. MED152                | 0    | 0    | 0    | 0    | 0    | 0    | 0    |
| <i>Psychroflexus gondwanensis</i> ACAM 44(T)  | 0    | 0    | 0    | 0    | 0    | 0    | 0    |
| <i>Psychroflexus torquis</i> 651(T)           | 0    | 0    | 0    | 0    | 0    | 0    | 0    |
| <i>Robiginitalea biformata</i> HTCC2501(T)    | 0    | 0    | 0    | 0    | 0    | 1    | 0    |
| <i>Zobellia galactanivorans</i> Dsij(T)       | 0    | 0    | 0    | 0    | 0    | 0    | 0    |
| <i>Zunogwangia profunda</i> SM-A87(T)         | 0    | 0    | 0    | 0    | 0    | 3    | 0    |

|                                               | GH53 | GH54 | GH55 | GH56 | GH57 | GH58 | GH59 |
|-----------------------------------------------|------|------|------|------|------|------|------|
| <i>Cellulophaga algicola</i> IC166(T)         | 0    | 0    | 0    | 0    | 0    | 0    | 0    |
| <i>Cellulophaga lytica</i> LIM-21(T)          | 0    | 0    | 0    | 0    | 0    | 0    | 0    |
| <i>Croceibacter atlanticus</i> HTCC2559(T)    | 0    | 0    | 0    | 0    | 0    | 0    | 0    |
| <i>Dokdonia donghaensis</i> MED134            | 0    | 0    | 0    | 0    | 0    | 0    | 0    |
| <i>Dokdonia</i> sp. 4H-3-7-5                  | 0    | 0    | 0    | 0    | 0    | 0    | 0    |
| <i>Flavobacteriaceae bacterium</i> S85        | 0    | 0    | 0    | 0    | 0    | 0    | 0    |
| <i>Flavobacterium johnsoniae</i> UW101(T)     | 0    | 0    | 1    | 0    | 0    | 0    | 0    |
| <i>Formosa agariphila</i> KMM 3901(T)         | 1    | 0    | 0    | 0    | 0    | 0    | 0    |
| <i>Gillisia limnaea</i> R-8282(T)             | 0    | 0    | 0    | 0    | 1    | 0    | 0    |
| <i>Gillisia</i> sp. CBA3202                   | 0    | 0    | 0    | 0    | 0    | 0    | 0    |
| <i>Gramella forsetii</i> ' KT0803             | 1    | 0    | 0    | 0    | 0    | 0    | 0    |
| <i>Imtechella halotolerans</i> K1(T)          | 0    | 0    | 0    | 0    | 0    | 0    | 0    |
| <i>Joostella marina</i> En5(T)                | 0    | 0    | 0    | 0    | 0    | 0    | 0    |
| <i>Kordia algicida</i> OT-1(T)                | 0    | 0    | 0    | 0    | 0    | 0    | 0    |
| <i>Leeuwenhoekiella blandensis</i> MED217(T)  | 0    | 0    | 0    | 0    | 0    | 0    | 0    |
| <i>Maribacter</i> sp. HTCC2170                | 0    | 0    | 0    | 0    | 0    | 0    | 0    |
| <i>Mesoflavibacter zeaxanthinifaciens</i> S86 | 0    | 0    | 0    | 0    | 0    | 0    | 0    |
| <i>Muricauda ruestringensis</i> B1(T)         | 0    | 0    | 0    | 0    | 0    | 0    | 0    |
| <i>Polaribacter irgensii</i> 23-P(T)          | 0    | 0    | 0    | 0    | 0    | 0    | 0    |
| <i>Polaribacter</i> sp. Hel1_33_49            | 0    | 0    | 0    | 0    | 0    | 0    | 0    |
| <i>Polaribacter</i> sp. Hel1_85               | 0    | 0    | 0    | 0    | 0    | 0    | 0    |
| <i>Polaribacter</i> sp. MED152                | 1    | 0    | 0    | 0    | 0    | 0    | 0    |
| <i>Psychroflexus gondwanensis</i> ACAM 44(T)  | 0    | 0    | 0    | 0    | 0    | 0    | 0    |
| <i>Psychroflexus torquis</i> 651(T)           | 0    | 0    | 0    | 0    | 0    | 0    | 0    |
| <i>Robiginitalea biformata</i> HTCC2501(T)    | 0    | 0    | 0    | 0    | 0    | 0    | 0    |
| <i>Zobellia galactanivorans</i> Dsij(T)       | 0    | 0    | 0    | 0    | 0    | 0    | 0    |
| <i>Zunogwangia profunda</i> SM-A87(T)         | 0    | 0    | 0    | 0    | 0    | 0    | 0    |

|                                               | GH60 | GH61 | GH62 | GH63 | GH64 | GH65 | GH66 |
|-----------------------------------------------|------|------|------|------|------|------|------|
| <i>Cellulophaga algicola</i> IC166(T)         | 0    | 0    | 0    | 2    | 0    | 1    | 0    |
| <i>Cellulophaga lytica</i> LIM-21(T)          | 0    | 0    | 0    | 1    | 0    | 1    | 0    |
| <i>Croceibacter atlanticus</i> HTCC2559(T)    | 0    | 0    | 0    | 0    | 0    | 1    | 0    |
| <i>Dokdonia donghaensis</i> MED134            | 0    | 0    | 0    | 0    | 0    | 1    | 0    |
| <i>Dokdonia</i> sp. 4H-3-7-5                  | 0    | 0    | 0    | 0    | 0    | 0    | 0    |
| <i>Flavobacteriaceae bacterium</i> S85        | 0    | 0    | 0    | 1    | 0    | 1    | 0    |
| <i>Flavobacterium johnsoniae</i> UW101(T)     | 0    | 0    | 0    | 0    | 1    | 3    | 1    |
| <i>Formosa agariphila</i> KMM 3901(T)         | 0    | 0    | 0    | 1    | 0    | 1    | 0    |
| <i>Gillisia limnaea</i> R-8282(T)             | 0    | 0    | 0    | 0    | 0    | 3    | 0    |
| <i>Gillisia</i> sp. CBA3202                   | 0    | 0    | 0    | 0    | 0    | 1    | 0    |
| <i>Gramella forsetii</i> ' KT0803             | 0    | 0    | 0    | 2    | 0    | 1    | 0    |
| <i>Imtechella halotolerans</i> K1(T)          | 0    | 0    | 0    | 1    | 0    | 1    | 0    |
| <i>Joostella marina</i> En5(T)                | 0    | 0    | 0    | 1    | 0    | 1    | 0    |
| <i>Kordia algicida</i> OT-1(T)                | 0    | 0    | 0    | 0    | 0    | 1    | 0    |
| <i>Leeuwenhoekiella blandensis</i> MED217(T)  | 0    | 0    | 0    | 1    | 0    | 1    | 0    |
| <i>Maribacter</i> sp. HTCC2170                | 0    | 0    | 0    | 0    | 0    | 1    | 0    |
| <i>Mesoflavibacter zeaxanthinifaciens</i> S86 | 0    | 0    | 0    | 1    | 0    | 1    | 0    |
| <i>Muricauda ruestringensis</i> B1(T)         | 0    | 0    | 0    | 0    | 0    | 1    | 0    |
| <i>Polaribacter irgensii</i> 23-P(T)          | 0    | 0    | 0    | 0    | 0    | 0    | 0    |
| <i>Polaribacter</i> sp. Hel1_33_49            | 0    | 0    | 0    | 0    | 0    | 1    | 0    |
| <i>Polaribacter</i> sp. Hel1_85               | 0    | 0    | 0    | 0    | 0    | 1    | 0    |
| <i>Polaribacter</i> sp. MED152                | 0    | 0    | 0    | 0    | 0    | 2    | 0    |
| <i>Psychroflexus gondwanensis</i> ACAM 44(T)  | 0    | 0    | 0    | 0    | 0    | 1    | 0    |
| <i>Psychroflexus torquis</i> 651(T)           | 0    | 0    | 0    | 1    | 0    | 1    | 0    |
| <i>Robiginitalea biformata</i> HTCC2501(T)    | 0    | 0    | 0    | 0    | 0    | 1    | 0    |
| <i>Zobellia galactanivorans</i> Dsij(T)       | 0    | 0    | 0    | 4    | 1    | 1    | 0    |
| <i>Zunogwangia profunda</i> SM-A87(T)         | 0    | 0    | 0    | 0    | 0    | 1    | 0    |

|                                               | GH67 | GH68 | GH69 | GH70 | GH71 | GH72 | GH73 |
|-----------------------------------------------|------|------|------|------|------|------|------|
| <i>Cellulophaga algicola</i> IC166(T)         | 0    | 0    | 0    | 0    | 0    | 0    | 1    |
| <i>Cellulophaga lytica</i> LIM-21(T)          | 0    | 0    | 0    | 0    | 0    | 0    | 1    |
| <i>Croceibacter atlanticus</i> HTCC2559(T)    | 0    | 0    | 0    | 0    | 0    | 0    | 1    |
| <i>Dokdonia donghaensis</i> MED134            | 0    | 0    | 0    | 0    | 0    | 0    | 1    |
| <i>Dokdonia</i> sp. 4H-3-7-5                  | 0    | 0    | 0    | 0    | 0    | 0    | 0    |
| <i>Flavobacteriaceae bacterium</i> S85        | 0    | 0    | 0    | 0    | 0    | 0    | 1    |
| <i>Flavobacterium johnsoniae</i> UW101(T)     | 1    | 0    | 0    | 0    | 0    | 0    | 1    |
| <i>Formosa agariphila</i> KMM 3901(T)         | 0    | 0    | 0    | 0    | 0    | 0    | 1    |
| <i>Gillisia limnaea</i> R-8282(T)             | 0    | 0    | 0    | 0    | 0    | 0    | 1    |
| <i>Gillisia</i> sp. CBA3202                   | 0    | 0    | 0    | 0    | 0    | 0    | 1    |
| <i>Gramella forsetii</i> ' KT0803             | 0    | 0    | 0    | 0    | 0    | 0    | 1    |
| <i>Imtechella halotolerans</i> K1(T)          | 0    | 0    | 0    | 0    | 0    | 0    | 1    |
| <i>Joostella marina</i> En5(T)                | 0    | 0    | 0    | 0    | 0    | 0    | 1    |
| <i>Kordia algicida</i> OT-1(T)                | 0    | 0    | 0    | 0    | 0    | 0    | 1    |
| <i>Leeuwenhoekiella blandensis</i> MED217(T)  | 0    | 0    | 0    | 0    | 0    | 0    | 1    |
| <i>Maribacter</i> sp. HTCC2170                | 0    | 0    | 0    | 0    | 0    | 0    | 1    |
| <i>Mesoflavibacter zeaxanthinifaciens</i> S86 | 1    | 0    | 0    | 0    | 0    | 0    | 1    |
| <i>Muricauda ruestringensis</i> B1(T)         | 0    | 0    | 0    | 0    | 0    | 0    | 1    |
| <i>Polaribacter irgensii</i> 23-P(T)          | 0    | 0    | 0    | 0    | 0    | 0    | 1    |
| <i>Polaribacter</i> sp. Hel1_33_49            | 0    | 0    | 0    | 0    | 0    | 0    | 1    |
| <i>Polaribacter</i> sp. Hel1_85               | 0    | 0    | 0    | 0    | 0    | 0    | 1    |
| <i>Polaribacter</i> sp. MED152                | 0    | 0    | 0    | 0    | 0    | 0    | 1    |
| <i>Psychroflexus gondwanensis</i> ACAM 44(T)  | 0    | 0    | 0    | 0    | 0    | 0    | 1    |
| <i>Psychroflexus torquis</i> 651(T)           | 0    | 0    | 0    | 0    | 0    | 0    | 1    |
| <i>Robiginitalea biformata</i> HTCC2501(T)    | 1    | 0    | 0    | 0    | 0    | 0    | 1    |
| <i>Zobellia galactanivorans</i> Dsij(T)       | 0    | 0    | 0    | 0    | 0    | 0    | 1    |
| <i>Zunogwangia profunda</i> SM-A87(T)         | 1    | 0    | 0    | 0    | 0    | 0    | 1    |

|                                               | GH74 | GH75 | GH76 | GH77 | GH78 | GH79 | GH80 |
|-----------------------------------------------|------|------|------|------|------|------|------|
| <i>Cellulophaga algicola</i> IC166(T)         | 1    | 0    | 0    | 0    | 0    | 0    | 0    |
| <i>Cellulophaga lytica</i> LIM-21(T)          | 0    | 0    | 0    | 0    | 0    | 0    | 0    |
| <i>Croceibacter atlanticus</i> HTCC2559(T)    | 0    | 0    | 0    | 0    | 0    | 0    | 0    |
| <i>Dokdonia donghaensis</i> MED134            | 0    | 0    | 0    | 0    | 0    | 0    | 0    |
| <i>Dokdonia</i> sp. 4H-3-7-5                  | 0    | 0    | 0    | 0    | 0    | 0    | 0    |
| <i>Flavobacteriaceae bacterium</i> S85        | 5    | 0    | 0    | 0    | 0    | 0    | 0    |
| <i>Flavobacterium johnsoniae</i> UW101(T)     | 0    | 0    | 0    | 0    | 3    | 0    | 0    |
| <i>Formosa agariphila</i> KMM 3901(T)         | 1    | 0    | 0    | 0    | 3    | 0    | 0    |
| <i>Gillisia limnaea</i> R-8282(T)             | 0    | 0    | 0    | 1    | 0    | 0    | 0    |
| <i>Gillisia</i> sp. CBA3202                   | 0    | 0    | 0    | 0    | 0    | 0    | 0    |
| <i>Gramella forsetii</i> ' KT0803             | 0    | 0    | 0    | 0    | 1    | 0    | 0    |
| <i>Imtechella halotolerans</i> K1(T)          | 0    | 0    | 0    | 0    | 1    | 0    | 0    |
| <i>Joostella marina</i> En5(T)                | 0    | 0    | 0    | 0    | 0    | 0    | 0    |
| <i>Kordia algicida</i> OT-1(T)                | 0    | 0    | 0    | 0    | 0    | 0    | 0    |
| <i>Leeuwenhoekiella blandensis</i> MED217(T)  | 0    | 0    | 0    | 0    | 2    | 0    | 0    |
| <i>Maribacter</i> sp. HTCC2170                | 0    | 0    | 1    | 0    | 0    | 0    | 0    |
| <i>Mesoflavibacter zeaxanthinifaciens</i> S86 | 0    | 0    | 0    | 0    | 1    | 0    | 0    |
| <i>Muricauda ruestringensis</i> B1(T)         | 0    | 0    | 1    | 0    | 1    | 0    | 0    |
| <i>Polaribacter irgensii</i> 23-P(T)          | 0    | 0    | 0    | 0    | 1    | 0    | 0    |
| <i>Polaribacter</i> sp. Hel1_33_49            | 0    | 0    | 0    | 0    | 0    | 0    | 0    |
| <i>Polaribacter</i> sp. Hel1_85               | 0    | 0    | 0    | 0    | 0    | 0    | 0    |
| <i>Polaribacter</i> sp. MED152                | 0    | 0    | 0    | 0    | 0    | 0    | 0    |
| <i>Psychroflexus gondwanensis</i> ACAM 44(T)  | 0    | 0    | 0    | 0    | 0    | 0    | 0    |
| <i>Psychroflexus torquis</i> 651(T)           | 0    | 0    | 0    | 0    | 0    | 0    | 0    |
| <i>Robiginitalea biformata</i> HTCC2501(T)    | 0    | 0    | 0    | 0    | 5    | 0    | 0    |
| <i>Zobellia galactanivorans</i> Dsij(T)       | 2    | 0    | 0    | 0    | 4    | 0    | 0    |
| <i>Zunogwangia profunda</i> SM-A87(T)         | 0    | 0    | 1    | 0    | 1    | 0    | 0    |

|                                               | GH81 | GH82 | GH83 | GH84 | GH85 | GH86 | GH87 |
|-----------------------------------------------|------|------|------|------|------|------|------|
| <i>Cellulophaga algicola</i> IC166(T)         | 0    | 1    | 0    | 0    | 0    | 1    | 0    |
| <i>Cellulophaga lytica</i> LIM-21(T)          | 0    | 2    | 0    | 0    | 0    | 1    | 0    |
| <i>Croceibacter atlanticus</i> HTCC2559(T)    | 0    | 0    | 0    | 0    | 0    | 0    | 0    |
| <i>Dokdonia donghaensis</i> MED134            | 0    | 0    | 0    | 0    | 0    | 0    | 0    |
| <i>Dokdonia</i> sp. 4H-3-7-5                  | 0    | 0    | 0    | 0    | 0    | 0    | 0    |
| <i>Flavobacteriaceae bacterium</i> S85        | 0    | 2    | 0    | 0    | 0    | 3    | 0    |
| <i>Flavobacterium johnsoniae</i> UW101(T)     | 0    | 0    | 0    | 0    | 0    | 0    | 1    |
| <i>Formosa agariphila</i> KMM 3901(T)         | 0    | 0    | 0    | 0    | 0    | 2    | 0    |
| <i>Gillisia limnaea</i> R-8282(T)             | 0    | 0    | 0    | 0    | 0    | 0    | 0    |
| <i>Gillisia</i> sp. CBA3202                   | 0    | 0    | 0    | 0    | 0    | 0    | 0    |
| <i>Gramella forsetii</i> ' KT0803             | 0    | 0    | 0    | 0    | 0    | 0    | 0    |
| <i>Imtechella halotolerans</i> K1(T)          | 0    | 0    | 0    | 0    | 0    | 0    | 0    |
| <i>Joostella marina</i> En5(T)                | 0    | 0    | 0    | 0    | 0    | 0    | 0    |
| <i>Kordia algicida</i> OT-1(T)                | 0    | 0    | 0    | 0    | 0    | 0    | 0    |
| <i>Leeuwenhoekiella blandensis</i> MED217(T)  | 0    | 0    | 0    | 0    | 0    | 0    | 0    |
| <i>Maribacter</i> sp. HTCC2170                | 0    | 0    | 0    | 0    | 0    | 0    | 0    |
| <i>Mesoflavibacter zeaxanthinifaciens</i> S86 | 0    | 0    | 0    | 0    | 0    | 0    | 0    |
| <i>Muricauda ruestringensis</i> B1(T)         | 0    | 0    | 0    | 0    | 0    | 0    | 0    |
| <i>Polaribacter irgensii</i> 23-P(T)          | 0    | 0    | 0    | 0    | 0    | 0    | 0    |
| <i>Polaribacter</i> sp. Hel1_33_49            | 1    | 0    | 0    | 0    | 0    | 0    | 0    |
| <i>Polaribacter</i> sp. Hel1_85               | 1    | 0    | 0    | 0    | 0    | 0    | 0    |
| <i>Polaribacter</i> sp. MED152                | 1    | 0    | 0    | 0    | 0    | 0    | 0    |
| <i>Psychroflexus gondwanensis</i> ACAM 44(T)  | 0    | 0    | 0    | 0    | 0    | 0    | 0    |
| <i>Psychroflexus torquis</i> 651(T)           | 0    | 0    | 0    | 0    | 0    | 0    | 0    |
| <i>Robiginitalea biformata</i> HTCC2501(T)    | 0    | 0    | 0    | 0    | 0    | 0    | 0    |
| <i>Zobellia galactanivorans</i> Dsj(T)        | 0    | 3    | 0    | 0    | 0    | 0    | 0    |
| <i>Zunogwangia profunda</i> SM-A87(T)         | 0    | 0    | 0    | 1    | 0    | 0    | 0    |

|                                               | GH88 | GH89 | GH90 | GH91 | GH92 | GH93 | GH94 |
|-----------------------------------------------|------|------|------|------|------|------|------|
| <i>Cellulophaga algicola</i> IC166(T)         | 0    | 0    | 0    | 0    | 0    | 0    | 0    |
| <i>Cellulophaga lytica</i> LIM-21(T)          | 0    | 0    | 0    | 0    | 2    | 0    | 0    |
| <i>Croceibacter atlanticus</i> HTCC2559(T)    | 0    | 0    | 0    | 0    | 1    | 0    | 0    |
| <i>Dokdonia donghaensis</i> MED134            | 0    | 0    | 0    | 0    | 1    | 0    | 0    |
| <i>Dokdonia</i> sp. 4H-3-7-5                  | 0    | 0    | 0    | 0    | 1    | 0    | 0    |
| <i>Flavobacteriaceae bacterium</i> S85        | 1    | 0    | 0    | 0    | 3    | 0    | 0    |
| <i>Flavobacterium johnsoniae</i> UW101(T)     | 2    | 1    | 0    | 0    | 7    | 0    | 0    |
| <i>Formosa agariphila</i> KMM 3901(T)         | 5    | 0    | 0    | 0    | 0    | 0    | 0    |
| <i>Gillisia limnaea</i> R-8282(T)             | 0    | 0    | 0    | 0    | 0    | 0    | 1    |
| <i>Gillisia</i> sp. CBA3202                   | 0    | 0    | 0    | 0    | 0    | 0    | 0    |
| <i>Gramella forsetii</i> ' KT0803             | 0    | 0    | 0    | 0    | 0    | 0    | 0    |
| <i>Imtechella halotolerans</i> K1(T)          | 0    | 0    | 0    | 0    | 5    | 0    | 0    |
| <i>Joostella marina</i> En5(T)                | 2    | 0    | 0    | 0    | 3    | 0    | 0    |
| <i>Kordia algicida</i> OT-1(T)                | 0    | 0    | 0    | 0    | 1    | 0    | 0    |
| <i>Leeuwenhoekiella blandensis</i> MED217(T)  | 0    | 0    | 0    | 0    | 6    | 1    | 0    |
| <i>Maribacter</i> sp. HTCC2170                | 1    | 0    | 0    | 0    | 6    | 0    | 1    |
| <i>Mesoflavibacter zeaxanthinifaciens</i> S86 | 1    | 1    | 0    | 0    | 6    | 0    | 0    |
| <i>Muricauda ruestringensis</i> B1(T)         | 0    | 0    | 0    | 0    | 0    | 0    | 0    |
| <i>Polaribacter irgensii</i> 23-P(T)          | 0    | 0    | 0    | 0    | 0    | 0    | 0    |
| <i>Polaribacter</i> sp. Hel1_33_49            | 1    | 0    | 0    | 0    | 6    | 0    | 0    |
| <i>Polaribacter</i> sp. Hel1_85               | 1    | 0    | 0    | 0    | 0    | 0    | 0    |
| <i>Polaribacter</i> sp. MED152                | 0    | 0    | 0    | 0    | 1    | 0    | 0    |
| <i>Psychroflexus gondwanensis</i> ACAM 44(T)  | 0    | 0    | 0    | 0    | 0    | 0    | 0    |
| <i>Psychroflexus torquis</i> 651(T)           | 0    | 0    | 0    | 0    | 0    | 0    | 0    |
| <i>Robiginitalea biformata</i> HTCC2501(T)    | 0    | 0    | 0    | 0    | 0    | 0    | 0    |
| <i>Zobellia galactanivorans</i> Dsij(T)       | 3    | 1    | 0    | 0    | 1    | 0    | 0    |
| <i>Zunogwangia profunda</i> SM-A87(T)         | 1    | 1    | 0    | 0    | 10   | 0    | 0    |



|                                               | GH95 | GH96 | GH97 | GH98 | GH99 | GH100 | GH101 |
|-----------------------------------------------|------|------|------|------|------|-------|-------|
| <i>Cellulophaga algicola</i> IC166(T)         | 0    | 0    | 0    | 0    | 0    | 0     | 0     |
| <i>Cellulophaga lytica</i> LIM-21(T)          | 0    | 0    | 0    | 0    | 0    | 0     | 0     |
| <i>Croceibacter atlanticus</i> HTCC2559(T)    | 0    | 0    | 0    | 0    | 0    | 1     | 0     |
| <i>Dokdonia donghaensis</i> MED134            | 0    | 0    | 0    | 0    | 0    | 0     | 0     |
| <i>Dokdonia</i> sp. 4H-3-7-5                  | 0    | 0    | 0    | 0    | 0    | 0     | 0     |
| <i>Flavobacteriaceae bacterium</i> S85        | 1    | 0    | 2    | 0    | 0    | 0     | 0     |
| <i>Flavobacterium johnsoniae</i> UW101(T)     | 3    | 0    | 8    | 0    | 1    | 0     | 0     |
| <i>Formosa agariphila</i> KMM 3901(T)         | 1    | 0    | 1    | 0    | 0    | 0     | 0     |
| <i>Gillisia limnaea</i> R-8282(T)             | 0    | 0    | 1    | 0    | 0    | 1     | 0     |
| <i>Gillisia</i> sp. CBA3202                   | 0    | 0    | 1    | 0    | 0    | 0     | 0     |
| <i>Gramella forsetii</i> ' KT0803             | 0    | 0    | 2    | 0    | 0    | 0     | 0     |
| <i>Imtechella halotolerans</i> K1(T)          | 2    | 0    | 1    | 0    | 0    | 0     | 0     |
| <i>Joostella marina</i> En5(T)                | 2    | 0    | 2    | 0    | 0    | 0     | 0     |
| <i>Kordia algicida</i> OT-1(T)                | 0    | 0    | 1    | 0    | 0    | 1     | 0     |
| <i>Leeuwenhoekiella blandensis</i> MED217(T)  | 0    | 0    | 3    | 0    | 0    | 0     | 0     |
| <i>Maribacter</i> sp. HTCC2170                | 1    | 0    | 1    | 0    | 0    | 0     | 0     |
| <i>Mesoflavibacter zeaxanthinifaciens</i> S86 | 1    | 0    | 1    | 0    | 1    | 0     | 0     |
| <i>Muricauda ruestringensis</i> B1(T)         | 0    | 0    | 0    | 0    | 0    | 0     | 0     |
| <i>Polaribacter irgensii</i> 23-P(T)          | 0    | 0    | 0    | 0    | 0    | 0     | 0     |
| <i>Polaribacter</i> sp. Hel1_33_49            | 0    | 0    | 0    | 0    | 0    | 0     | 0     |
| <i>Polaribacter</i> sp. Hel1_85               | 3    | 0    | 2    | 0    | 0    | 0     | 0     |
| <i>Polaribacter</i> sp. MED152                | 0    | 0    | 0    | 0    | 0    | 0     | 0     |
| <i>Psychroflexus gondwanensis</i> ACAM 44(T)  | 0    | 0    | 1    | 0    | 0    | 1     | 0     |
| <i>Psychroflexus torquis</i> 651(T)           | 0    | 0    | 2    | 0    | 0    | 1     | 0     |
| <i>Robiginitalea biformata</i> HTCC2501(T)    | 0    | 0    | 0    | 0    | 0    | 0     | 0     |
| <i>Zobellia galactanivorans</i> Dsij(T)       | 7    | 0    | 6    | 0    | 0    | 0     | 0     |
| <i>Zunogwangia profunda</i> SM-A87(T)         | 2    | 0    | 6    | 0    | 0    | 0     | 0     |

|                                               | GH102 | GH103 | GH104 | GH105 | GH106 | GH107 | GH108 |
|-----------------------------------------------|-------|-------|-------|-------|-------|-------|-------|
| <i>Cellulophaga algicola</i> IC166(T)         | 0     | 0     | 0     | 0     | 0     | 0     | 0     |
| <i>Cellulophaga lytica</i> LIM-21(T)          | 0     | 0     | 0     | 0     | 0     | 0     | 0     |
| <i>Croceibacter atlanticus</i> HTCC2559(T)    | 0     | 0     | 0     | 0     | 0     | 0     | 0     |
| <i>Dokdonia donghaensis</i> MED134            | 0     | 0     | 0     | 0     | 0     | 0     | 0     |
| <i>Dokdonia</i> sp. 4H-3-7-5                  | 0     | 0     | 0     | 0     | 0     | 0     | 0     |
| <i>Flavobacteriaceae bacterium</i> S85        | 0     | 0     | 0     | 0     | 0     | 0     | 0     |
| <i>Flavobacterium johnsoniae</i> UW101(T)     | 0     | 0     | 0     | 4     | 2     | 0     | 0     |
| <i>Formosa agariphila</i> KMM 3901(T)         | 0     | 0     | 0     | 1     | 1     | 0     | 0     |
| <i>Gillisia limnaea</i> R-8282(T)             | 0     | 0     | 0     | 0     | 0     | 0     | 0     |
| <i>Gillisia</i> sp. CBA3202                   | 0     | 0     | 0     | 0     | 0     | 0     | 0     |
| <i>Gramella forsetii</i> ' KT0803             | 0     | 0     | 0     | 0     | 0     | 0     | 0     |
| <i>Imtechella halotolerans</i> K1(T)          | 0     | 0     | 0     | 0     | 0     | 0     | 0     |
| <i>Joostella marina</i> En5(T)                | 0     | 0     | 0     | 2     | 0     | 0     | 0     |
| <i>Kordia algicida</i> OT-1(T)                | 0     | 0     | 0     | 0     | 0     | 0     | 0     |
| <i>Leeuwenhoekiella blandensis</i> MED217(T)  | 0     | 0     | 0     | 4     | 1     | 0     | 0     |
| <i>Maribacter</i> sp. HTCC2170                | 0     | 0     | 0     | 0     | 0     | 0     | 0     |
| <i>Mesoflavibacter zeaxanthinifaciens</i> S86 | 0     | 0     | 0     | 6     | 1     | 0     | 0     |
| <i>Muricauda ruestringensis</i> B1(T)         | 0     | 0     | 0     | 0     | 0     | 0     | 0     |
| <i>Polaribacter irgensii</i> 23-P(T)          | 0     | 0     | 0     | 0     | 0     | 0     | 0     |
| <i>Polaribacter</i> sp. Hel1_33_49            | 0     | 0     | 0     | 0     | 0     | 0     | 0     |
| <i>Polaribacter</i> sp. Hel1_85               | 0     | 0     | 0     | 0     | 0     | 0     | 0     |
| <i>Polaribacter</i> sp. MED152                | 0     | 0     | 0     | 0     | 0     | 0     | 0     |
| <i>Psychroflexus gondwanensis</i> ACAM 44(T)  | 0     | 0     | 0     | 0     | 0     | 0     | 0     |
| <i>Psychroflexus torquis</i> 651(T)           | 0     | 0     | 0     | 0     | 0     | 0     | 0     |
| <i>Robiginitalea biformata</i> HTCC2501(T)    | 0     | 0     | 0     | 0     | 1     | 0     | 0     |
| <i>Zobellia galactanivorans</i> Dsij(T)       | 0     | 0     | 0     | 3     | 0     | 0     | 0     |
| <i>Zunogwangia profunda</i> SM-A87(T)         | 0     | 0     | 0     | 0     | 0     | 0     | 0     |

|                                               | GH109 | GH110 | GH111 | GH112 | GH113 | GH114 | GH115 |
|-----------------------------------------------|-------|-------|-------|-------|-------|-------|-------|
| <i>Cellulophaga algicola</i> IC166(T)         | 0     | 0     | 0     | 0     | 1     | 1     | 0     |
| <i>Cellulophaga lytica</i> LIM-21(T)          | 0     | 0     | 0     | 0     | 1     | 0     | 0     |
| <i>Croceibacter atlanticus</i> HTCC2559(T)    | 0     | 0     | 0     | 0     | 1     | 0     | 0     |
| <i>Dokdonia donghaensis</i> MED134            | 0     | 0     | 0     | 0     | 1     | 0     | 0     |
| <i>Dokdonia</i> sp. 4H-3-7-5                  | 0     | 0     | 0     | 0     | 1     | 0     | 0     |
| <i>Flavobacteriaceae bacterium</i> S85        | 0     | 3     | 0     | 0     | 1     | 0     | 1     |
| <i>Flavobacterium johnsoniae</i> UW101(T)     | 0     | 0     | 0     | 0     | 0     | 0     | 1     |
| <i>Formosa agariphila</i> KMM 3901(T)         | 1     | 0     | 0     | 0     | 1     | 0     | 1     |
| <i>Gillisia limnaea</i> R-8282(T)             | 0     | 0     | 0     | 0     | 1     | 0     | 0     |
| <i>Gillisia</i> sp. CBA3202                   | 0     | 0     | 0     | 0     | 1     | 0     | 0     |
| <i>Gramella forsetii</i> ' KT0803             | 0     | 0     | 0     | 0     | 1     | 0     | 0     |
| <i>Imtechella halotolerans</i> K1(T)          | 1     | 1     | 0     | 0     | 0     | 0     | 0     |
| <i>Joostella marina</i> En5(T)                | 1     | 0     | 0     | 0     | 1     | 0     | 0     |
| <i>Kordia algicida</i> OT-1(T)                | 0     | 0     | 0     | 0     | 1     | 0     | 0     |
| <i>Leeuwenhoekiella blandensis</i> MED217(T)  | 1     | 0     | 0     | 0     | 1     | 0     | 1     |
| <i>Maribacter</i> sp. HTCC2170                | 1     | 0     | 0     | 0     | 1     | 0     | 0     |
| <i>Mesoflavibacter zeaxanthinifaciens</i> S86 | 1     | 0     | 0     | 0     | 1     | 0     | 4     |
| <i>Muricauda ruestringensis</i> B1(T)         | 1     | 0     | 0     | 0     | 1     | 0     | 0     |
| <i>Polaribacter irgensii</i> 23-P(T)          | 0     | 0     | 0     | 0     | 1     | 0     | 0     |
| <i>Polaribacter</i> sp. Hel1_33_49            | 0     | 0     | 0     | 0     | 1     | 0     | 0     |
| <i>Polaribacter</i> sp. Hel1_85               | 0     | 0     | 0     | 0     | 1     | 0     | 0     |
| <i>Polaribacter</i> sp. MED152                | 0     | 0     | 0     | 0     | 1     | 0     | 0     |
| <i>Psychroflexus gondwanensis</i> ACAM 44(T)  | 0     | 0     | 0     | 0     | 1     | 0     | 0     |
| <i>Psychroflexus torquis</i> 651(T)           | 0     | 0     | 0     | 0     | 1     | 0     | 0     |
| <i>Robiginitalea biformata</i> HTCC2501(T)    | 1     | 0     | 0     | 0     | 1     | 0     | 0     |
| <i>Zobellia galactanivorans</i> Dsij(T)       | 1     | 2     | 0     | 0     | 1     | 1     | 0     |
| <i>Zunogwangia profunda</i> SM-A87(T)         | 1     | 0     | 0     | 0     | 1     | 0     | 1     |

|                                               | GH116 | GH117 | GH118 | GH119 | GH120 | GH121 | GH122 |
|-----------------------------------------------|-------|-------|-------|-------|-------|-------|-------|
| <i>Cellulophaga algicola</i> IC166(T)         | 0     | 2     | 0     | 1     | 0     | 0     | 0     |
| <i>Cellulophaga lytica</i> LIM-21(T)          | 0     | 2     | 0     | 0     | 0     | 0     | 0     |
| <i>Croceibacter atlanticus</i> HTCC2559(T)    | 0     | 0     | 0     | 0     | 0     | 0     | 0     |
| <i>Dokdonia donghaensis</i> MED134            | 0     | 0     | 0     | 0     | 0     | 0     | 0     |
| <i>Dokdonia</i> sp. 4H-3-7-5                  | 0     | 0     | 0     | 0     | 0     | 0     | 0     |
| <i>Flavobacteriaceae bacterium</i> S85        | 0     | 10    | 0     | 0     | 1     | 0     | 0     |
| <i>Flavobacterium johnsoniae</i> UW101(T)     | 0     | 1     | 0     | 0     | 0     | 0     | 0     |
| <i>Formosa agariphila</i> KMM 3901(T)         | 0     | 6     | 0     | 0     | 0     | 0     | 0     |
| <i>Gillisia limnaea</i> R-8282(T)             | 0     | 0     | 0     | 0     | 0     | 0     | 0     |
| <i>Gillisia</i> sp. CBA3202                   | 0     | 0     | 0     | 0     | 0     | 0     | 0     |
| <i>Gramella forsetii</i> ' KT0803             | 0     | 1     | 0     | 0     | 0     | 0     | 0     |
| <i>Imtechella halotolerans</i> K1(T)          | 0     | 0     | 0     | 0     | 0     | 0     | 0     |
| <i>Joostella marina</i> En5(T)                | 0     | 2     | 0     | 0     | 0     | 0     | 0     |
| <i>Kordia algicida</i> OT-1(T)                | 0     | 0     | 0     | 0     | 0     | 0     | 0     |
| <i>Leeuwenhoekiella blandensis</i> MED217(T)  | 0     | 0     | 0     | 0     | 0     | 0     | 0     |
| <i>Maribacter</i> sp. HTCC2170                | 0     | 3     | 0     | 0     | 0     | 0     | 0     |
| <i>Mesoflavibacter zeaxanthinifaciens</i> S86 | 0     | 0     | 0     | 0     | 0     | 0     | 0     |
| <i>Muricauda ruestringensis</i> B1(T)         | 0     | 0     | 0     | 0     | 0     | 0     | 0     |
| <i>Polaribacter irgensii</i> 23-P(T)          | 0     | 0     | 0     | 0     | 0     | 0     | 0     |
| <i>Polaribacter</i> sp. Hel1_33_49            | 0     | 0     | 0     | 0     | 0     | 0     | 0     |
| <i>Polaribacter</i> sp. Hel1_85               | 0     | 5     | 0     | 0     | 1     | 0     | 0     |
| <i>Polaribacter</i> sp. MED152                | 0     | 0     | 0     | 0     | 0     | 0     | 0     |
| <i>Psychroflexus gondwanensis</i> ACAM 44(T)  | 0     | 0     | 0     | 0     | 0     | 0     | 0     |
| <i>Psychroflexus torquis</i> 651(T)           | 0     | 0     | 0     | 0     | 0     | 0     | 0     |
| <i>Robiginitalea biformata</i> HTCC2501(T)    | 0     | 0     | 0     | 0     | 0     | 0     | 0     |
| <i>Zobellia galactanivorans</i> Dsij(T)       | 2     | 6     | 0     | 1     | 1     | 0     | 0     |
| <i>Zunogwangia profunda</i> SM-A87(T)         | 0     | 0     | 0     | 0     | 0     | 0     | 0     |

|                                               | GH123 | GH124 | GH125 | GH126 | GH127 | GH128 | GH129 |
|-----------------------------------------------|-------|-------|-------|-------|-------|-------|-------|
| <i>Cellulophaga algicola</i> IC166(T)         | 0     | 0     | 0     | 0     | 2     | 0     | 0     |
| <i>Cellulophaga lytica</i> LIM-21(T)          | 0     | 0     | 0     | 0     | 1     | 0     | 1     |
| <i>Croceibacter atlanticus</i> HTCC2559(T)    | 0     | 0     | 0     | 0     | 0     | 0     | 0     |
| <i>Dokdonia donghaensis</i> MED134            | 0     | 0     | 0     | 0     | 0     | 0     | 0     |
| <i>Dokdonia</i> sp. 4H-3-7-5                  | 0     | 0     | 0     | 0     | 0     | 0     | 0     |
| <i>Flavobacteriaceae bacterium</i> S85        | 0     | 0     | 0     | 0     | 3     | 0     | 1     |
| <i>Flavobacterium johnsoniae</i> UW101(T)     | 0     | 0     | 1     | 0     | 1     | 0     | 0     |
| <i>Formosa agariphila</i> KMM 3901(T)         | 0     | 0     | 0     | 0     | 0     | 0     | 0     |
| <i>Gillisia limnaea</i> R-8282(T)             | 0     | 0     | 0     | 0     | 0     | 0     | 0     |
| <i>Gillisia</i> sp. CBA3202                   | 0     | 0     | 0     | 0     | 0     | 0     | 0     |
| <i>Gramella forsetii</i> ' KT0803             | 0     | 0     | 0     | 0     | 0     | 0     | 0     |
| <i>Imtechella halotolerans</i> K1(T)          | 0     | 0     | 0     | 0     | 0     | 0     | 0     |
| <i>Joostella marina</i> En5(T)                | 0     | 0     | 1     | 0     | 1     | 0     | 0     |
| <i>Kordia algicida</i> OT-1(T)                | 0     | 0     | 0     | 0     | 0     | 0     | 0     |
| <i>Leeuwenhoekiella blandensis</i> MED217(T)  | 0     | 0     | 1     | 0     | 0     | 0     | 0     |
| <i>Maribacter</i> sp. HTCC2170                | 0     | 0     | 0     | 0     | 0     | 0     | 0     |
| <i>Mesoflavibacter zeaxanthinifaciens</i> S86 | 0     | 0     | 0     | 0     | 1     | 0     | 0     |
| <i>Muricauda ruestringensis</i> B1(T)         | 0     | 0     | 0     | 0     | 1     | 0     | 0     |
| <i>Polaribacter irgensii</i> 23-P(T)          | 0     | 0     | 0     | 0     | 0     | 0     | 0     |
| <i>Polaribacter</i> sp. Hel1_33_49            | 0     | 0     | 0     | 0     | 0     | 0     | 0     |
| <i>Polaribacter</i> sp. Hel1_85               | 0     | 0     | 0     | 0     | 0     | 3     | 0     |
| <i>Polaribacter</i> sp. MED152                | 0     | 0     | 0     | 0     | 0     | 0     | 0     |
| <i>Psychroflexus gondwanensis</i> ACAM 44(T)  | 0     | 0     | 0     | 0     | 0     | 0     | 0     |
| <i>Psychroflexus torquis</i> 651(T)           | 0     | 0     | 0     | 0     | 0     | 0     | 0     |
| <i>Robiginitalea biformata</i> HTCC2501(T)    | 0     | 0     | 0     | 0     | 0     | 0     | 0     |
| <i>Zobellia galactanivorans</i> Dsij(T)       | 0     | 0     | 0     | 0     | 4     | 0     | 1     |
| <i>Zunogwangia profunda</i> SM-A87(T)         | 0     | 0     | 1     | 0     | 0     | 0     | 0     |

|                                               | GH130 | GH131 | GH132 | GH133 | GT1 | GT2 | GT3 |
|-----------------------------------------------|-------|-------|-------|-------|-----|-----|-----|
| <i>Cellulophaga algicola</i> IC166(T)         | 1     | 0     | 0     | 0     | 1   | 19  | 0   |
| <i>Cellulophaga lytica</i> LIM-21(T)          | 1     | 0     | 0     | 0     | 1   | 16  | 0   |
| <i>Croceibacter atlanticus</i> HTCC2559(T)    | 0     | 0     | 0     | 0     | 1   | 29  | 0   |
| <i>Dokdonia donghaensis</i> MED134            | 0     | 0     | 0     | 0     | 1   | 28  | 0   |
| <i>Dokdonia</i> sp. 4H-3-7-5                  | 0     | 0     | 0     | 0     | 0   | 9   | 0   |
| <i>Flavobacteriaceae bacterium</i> S85        | 1     | 0     | 0     | 0     | 1   | 22  | 0   |
| <i>Flavobacterium johnsoniae</i> UW101(T)     | 5     | 0     | 0     | 0     | 1   | 29  | 0   |
| <i>Formosa agariphila</i> KMM 3901(T)         | 2     | 0     | 0     | 0     | 1   | 32  | 0   |
| <i>Gillisia limnaea</i> R-8282(T)             | 2     | 0     | 0     | 0     | 1   | 34  | 0   |
| <i>Gillisia</i> sp. CBA3202                   | 1     | 0     | 0     | 0     | 1   | 30  | 0   |
| <i>Gramella forsetii</i> ' KT0803             | 0     | 0     | 0     | 0     | 1   | 27  | 0   |
| <i>Imtechella halotolerans</i> K1(T)          | 1     | 0     | 0     | 0     | 1   | 11  | 0   |
| <i>Joostella marina</i> En5(T)                | 0     | 0     | 0     | 0     | 1   | 12  | 0   |
| <i>Kordia algicida</i> OT-1(T)                | 0     | 0     | 0     | 0     | 2   | 26  | 0   |
| <i>Leeuwenhoekiella blandensis</i> MED217(T)  | 1     | 0     | 0     | 0     | 1   | 30  | 0   |
| <i>Maribacter</i> sp. HTCC2170                | 3     | 0     | 0     | 0     | 1   | 16  | 0   |
| <i>Mesoflavibacter zeaxanthinifaciens</i> S86 | 1     | 0     | 0     | 0     | 1   | 18  | 0   |
| <i>Muricauda ruestringensis</i> B1(T)         | 1     | 0     | 0     | 0     | 1   | 13  | 0   |
| <i>Polaribacter irgensii</i> 23-P(T)          | 0     | 0     | 0     | 0     | 0   | 7   | 0   |
| <i>Polaribacter</i> sp. Hel1_33_49            | 0     | 0     | 0     | 0     | 0   | 16  | 0   |
| <i>Polaribacter</i> sp. Hel1_85               | 0     | 0     | 0     | 0     | 2   | 16  | 0   |
| <i>Polaribacter</i> sp. MED152                | 0     | 0     | 0     | 0     | 1   | 16  | 0   |
| <i>Psychroflexus gondwanensis</i> ACAM 44(T)  | 0     | 0     | 0     | 0     | 1   | 25  | 0   |
| <i>Psychroflexus torquis</i> 651(T)           | 0     | 0     | 0     | 0     | 1   | 20  | 0   |
| <i>Robiginitalea biformata</i> HTCC2501(T)    | 1     | 0     | 0     | 0     | 2   | 19  | 0   |
| <i>Zobellia galactanivorans</i> Dsij(T)       | 1     | 0     | 0     | 0     | 1   | 21  | 0   |
| <i>Zunogwangia profunda</i> SM-A87(T)         | 4     | 0     | 0     | 0     | 2   | 25  | 0   |

|                                               | GT4 | GT5 | GT6 | GT7 | GT8 | GT9 | GT10 |
|-----------------------------------------------|-----|-----|-----|-----|-----|-----|------|
| <i>Cellulophaga algicola</i> IC166(T)         | 12  | 2   | 0   | 1   | 0   | 1   | 0    |
| <i>Cellulophaga lytica</i> LIM-21(T)          | 6   | 1   | 0   | 0   | 0   | 1   | 0    |
| <i>Croceibacter atlanticus</i> HTCC2559(T)    | 13  | 1   | 0   | 3   | 0   | 2   | 0    |
| <i>Dokdonia donghaensis</i> MED134            | 14  | 2   | 0   | 1   | 0   | 2   | 0    |
| <i>Dokdonia</i> sp. 4H-3-7-5                  | 4   | 2   | 0   | 1   | 0   | 1   | 0    |
| <i>Flavobacteriaceae bacterium</i> S85        | 11  | 2   | 0   | 0   | 0   | 1   | 0    |
| <i>Flavobacterium johnsoniae</i> UW101(T)     | 22  | 3   | 0   | 1   | 0   | 3   | 0    |
| <i>Formosa agariphila</i> KMM 3901(T)         | 17  | 2   | 0   | 0   | 0   | 2   | 0    |
| <i>Gillisia limnaea</i> R-8282(T)             | 25  | 1   | 0   | 1   | 0   | 2   | 2    |
| <i>Gillisia</i> sp. CBA3202                   | 22  | 1   | 0   | 1   | 0   | 2   | 0    |
| <i>Gramella forsetii</i> ' KT0803             | 16  | 2   | 0   | 2   | 0   | 2   | 1    |
| <i>Imtechella halotolerans</i> K1(T)          | 6   | 1   | 0   | 0   | 0   | 1   | 0    |
| <i>Joostella marina</i> En5(T)                | 6   | 2   | 0   | 0   | 0   | 1   | 0    |
| <i>Kordia algicida</i> OT-1(T)                | 13  | 2   | 0   | 1   | 0   | 2   | 0    |
| <i>Leeuwenhoekiella blandensis</i> MED217(T)  | 15  | 2   | 0   | 1   | 0   | 2   | 0    |
| <i>Maribacter</i> sp. HTCC2170                | 8   | 2   | 0   | 0   | 0   | 1   | 0    |
| <i>Mesoflavibacter zeaxanthinifaciens</i> S86 | 8   | 2   | 0   | 0   | 0   | 1   | 0    |
| <i>Muricauda ruestringensis</i> B1(T)         | 8   | 2   | 0   | 0   | 0   | 1   | 0    |
| <i>Polaribacter irgensii</i> 23-P(T)          | 8   | 2   | 0   | 0   | 0   | 1   | 0    |
| <i>Polaribacter</i> sp. Hel1_33_49            | 13  | 2   | 0   | 0   | 0   | 0   | 0    |
| <i>Polaribacter</i> sp. Hel1_85               | 18  | 2   | 0   | 0   | 0   | 0   | 0    |
| <i>Polaribacter</i> sp. MED152                | 9   | 2   | 0   | 0   | 0   | 0   | 0    |
| <i>Psychroflexus gondwanensis</i> ACAM 44(T)  | 10  | 1   | 0   | 2   | 0   | 2   | 0    |
| <i>Psychroflexus torquis</i> 651(T)           | 8   | 2   | 0   | 1   | 0   | 3   | 0    |
| <i>Robiginitalea biformata</i> HTCC2501(T)    | 11  | 2   | 0   | 0   | 0   | 1   | 0    |
| <i>Zobellia galactanivorans</i> Dsij(T)       | 14  | 2   | 0   | 0   | 0   | 1   | 0    |
| <i>Zunogwangia profunda</i> SM-A87(T)         | 16  | 2   | 0   | 1   | 0   | 2   | 1    |

|                                               | GT11 | GT12 | GT13 | GT14 | GT15 | GT16 | GT17 |
|-----------------------------------------------|------|------|------|------|------|------|------|
| <i>Cellulophaga algicola</i> IC166(T)         | 0    | 0    | 0    | 0    | 0    | 0    | 0    |
| <i>Cellulophaga lytica</i> LIM-21(T)          | 0    | 0    | 0    | 0    | 0    | 0    | 0    |
| <i>Croceibacter atlanticus</i> HTCC2559(T)    | 0    | 0    | 0    | 0    | 0    | 0    | 0    |
| <i>Dokdonia donghaensis</i> MED134            | 0    | 0    | 0    | 0    | 0    | 0    | 0    |
| <i>Dokdonia</i> sp. 4H-3-7-5                  | 0    | 0    | 0    | 0    | 0    | 0    | 0    |
| <i>Flavobacteriaceae bacterium</i> S85        | 0    | 0    | 0    | 0    | 0    | 0    | 0    |
| <i>Flavobacterium johnsoniae</i> UW101(T)     | 1    | 0    | 0    | 0    | 0    | 0    | 0    |
| <i>Formosa agariphila</i> KMM 3901(T)         | 0    | 0    | 0    | 0    | 0    | 0    | 0    |
| <i>Gillisia limnaea</i> R-8282(T)             | 1    | 0    | 1    | 0    | 0    | 0    | 0    |
| <i>Gillisia</i> sp. CBA3202                   | 0    | 0    | 0    | 0    | 0    | 0    | 0    |
| <i>Gramella forsetii</i> ' KT0803             | 1    | 0    | 0    | 0    | 0    | 0    | 0    |
| <i>Imtechella halotolerans</i> K1(T)          | 0    | 0    | 0    | 0    | 0    | 0    | 0    |
| <i>Joostella marina</i> En5(T)                | 0    | 0    | 0    | 0    | 0    | 0    | 0    |
| <i>Kordia algicida</i> OT-1(T)                | 0    | 0    | 0    | 0    | 0    | 0    | 0    |
| <i>Leeuwenhoekiella blandensis</i> MED217(T)  | 0    | 0    | 0    | 0    | 0    | 0    | 0    |
| <i>Maribacter</i> sp. HTCC2170                | 0    | 0    | 0    | 0    | 0    | 0    | 0    |
| <i>Mesoflavibacter zeaxanthinifaciens</i> S86 | 0    | 0    | 0    | 0    | 0    | 0    | 0    |
| <i>Muricauda ruestringensis</i> B1(T)         | 0    | 0    | 0    | 1    | 0    | 0    | 0    |
| <i>Polaribacter irgensii</i> 23-P(T)          | 0    | 0    | 0    | 0    | 0    | 0    | 0    |
| <i>Polaribacter</i> sp. Hel1_33_49            | 0    | 0    | 0    | 0    | 0    | 0    | 0    |
| <i>Polaribacter</i> sp. Hel1_85               | 0    | 0    | 0    | 0    | 0    | 0    | 0    |
| <i>Polaribacter</i> sp. MED152                | 1    | 0    | 0    | 0    | 0    | 0    | 0    |
| <i>Psychroflexus gondwanensis</i> ACAM 44(T)  | 0    | 0    | 0    | 0    | 0    | 0    | 0    |
| <i>Psychroflexus torquis</i> 651(T)           | 0    | 0    | 0    | 0    | 0    | 0    | 0    |
| <i>Robiginitalea biformata</i> HTCC2501(T)    | 0    | 0    | 0    | 0    | 0    | 0    | 0    |
| <i>Zobellia galactanivorans</i> Dsij(T)       | 0    | 0    | 0    | 0    | 0    | 0    | 0    |
| <i>Zunogwangia profunda</i> SM-A87(T)         | 0    | 0    | 0    | 0    | 0    | 0    | 0    |



|                                               | GT18 | GT19 | GT20 | GT21 | GT22 | GT23 | GT24 |
|-----------------------------------------------|------|------|------|------|------|------|------|
| <i>Cellulophaga algicola</i> IC166(T)         | 0    | 1    | 1    | 2    | 0    | 0    | 0    |
| <i>Cellulophaga lytica</i> LIM-21(T)          | 0    | 1    | 1    | 2    | 0    | 0    | 0    |
| <i>Croceibacter atlanticus</i> HTCC2559(T)    | 0    | 1    | 0    | 2    | 1    | 0    | 0    |
| <i>Dokdonia donghaensis</i> MED134            | 0    | 1    | 0    | 3    | 0    | 0    | 0    |
| <i>Dokdonia</i> sp. 4H-3-7-5                  | 0    | 1    | 0    | 1    | 0    | 0    | 0    |
| <i>Flavobacteriaceae bacterium</i> S85        | 0    | 1    | 0    | 2    | 0    | 0    | 0    |
| <i>Flavobacterium johnsoniae</i> UW101(T)     | 0    | 1    | 0    | 2    | 0    | 0    | 0    |
| <i>Formosa agariphila</i> KMM 3901(T)         | 0    | 1    | 1    | 4    | 0    | 0    | 0    |
| <i>Gillisia limnaea</i> R-8282(T)             | 0    | 1    | 1    | 2    | 0    | 0    | 0    |
| <i>Gillisia</i> sp. CBA3202                   | 0    | 1    | 0    | 3    | 0    | 0    | 0    |
| <i>Gramella forsetii</i> ' KT0803             | 0    | 1    | 1    | 3    | 0    | 0    | 0    |
| <i>Imtechella halotolerans</i> K1(T)          | 0    | 1    | 0    | 1    | 0    | 0    | 0    |
| <i>Joostella marina</i> En5(T)                | 0    | 1    | 1    | 2    | 0    | 0    | 0    |
| <i>Kordia algicida</i> OT-1(T)                | 0    | 1    | 0    | 3    | 0    | 0    | 0    |
| <i>Leeuwenhoekiella blandensis</i> MED217(T)  | 0    | 1    | 1    | 3    | 0    | 0    | 0    |
| <i>Maribacter</i> sp. HTCC2170                | 0    | 1    | 1    | 2    | 0    | 0    | 0    |
| <i>Mesoflavibacter zeaxanthinifaciens</i> S86 | 0    | 1    | 1    | 3    | 0    | 0    | 0    |
| <i>Muricauda ruestringensis</i> B1(T)         | 0    | 1    | 1    | 3    | 0    | 0    | 0    |
| <i>Polaribacter irgensii</i> 23-P(T)          | 0    | 1    | 0    | 1    | 0    | 0    | 0    |
| <i>Polaribacter</i> sp. Hel1_33_49            | 0    | 1    | 0    | 6    | 0    | 0    | 0    |
| <i>Polaribacter</i> sp. Hel1_85               | 0    | 1    | 0    | 5    | 0    | 0    | 0    |
| <i>Polaribacter</i> sp. MED152                | 0    | 1    | 0    | 1    | 0    | 0    | 0    |
| <i>Psychroflexus gondwanensis</i> ACAM 44(T)  | 0    | 1    | 1    | 3    | 0    | 0    | 0    |
| <i>Psychroflexus torquis</i> 651(T)           | 0    | 1    | 1    | 2    | 0    | 0    | 0    |
| <i>Robiginitalea biformata</i> HTCC2501(T)    | 0    | 1    | 1    | 1    | 0    | 0    | 0    |
| <i>Zobellia galactanivorans</i> Dsij(T)       | 0    | 1    | 1    | 2    | 0    | 0    | 0    |
| <i>Zunogwangia profunda</i> SM-A87(T)         | 0    | 1    | 1    | 2    | 0    | 0    | 0    |

|                                               | GT25 | GT26 | GT27 | GT28 | GT29 | GT30 | GT31 |
|-----------------------------------------------|------|------|------|------|------|------|------|
| <i>Cellulophaga algicola</i> IC166(T)         | 0    | 0    | 0    | 1    | 0    | 1    | 0    |
| <i>Cellulophaga lytica</i> LIM-21(T)          | 0    | 1    | 0    | 2    | 0    | 1    | 0    |
| <i>Croceibacter atlanticus</i> HTCC2559(T)    | 0    | 0    | 0    | 2    | 0    | 1    | 0    |
| <i>Dokdonia donghaensis</i> MED134            | 0    | 0    | 0    | 2    | 0    | 1    | 0    |
| <i>Dokdonia</i> sp. 4H-3-7-5                  | 0    | 0    | 0    | 0    | 0    | 1    | 0    |
| <i>Flavobacteriaceae bacterium</i> S85        | 0    | 1    | 0    | 1    | 0    | 1    | 0    |
| <i>Flavobacterium johnsoniae</i> UW101(T)     | 0    | 0    | 0    | 2    | 0    | 1    | 0    |
| <i>Formosa agariphila</i> KMM 3901(T)         | 0    | 0    | 0    | 2    | 0    | 1    | 0    |
| <i>Gillisia limnaea</i> R-8282(T)             | 0    | 1    | 0    | 2    | 0    | 1    | 0    |
| <i>Gillisia</i> sp. CBA3202                   | 0    | 0    | 0    | 2    | 1    | 1    | 0    |
| <i>Gramella forsetii</i> ' KT0803             | 0    | 0    | 0    | 1    | 0    | 1    | 0    |
| <i>Imtechella halotolerans</i> K1(T)          | 0    | 0    | 0    | 2    | 0    | 1    | 0    |
| <i>Joostella marina</i> En5(T)                | 0    | 0    | 0    | 2    | 0    | 1    | 0    |
| <i>Kordia algicida</i> OT-1(T)                | 0    | 0    | 0    | 2    | 0    | 1    | 0    |
| <i>Leeuwenhoekiella blandensis</i> MED217(T)  | 0    | 0    | 0    | 2    | 0    | 1    | 0    |
| <i>Maribacter</i> sp. HTCC2170                | 0    | 0    | 0    | 2    | 0    | 1    | 0    |
| <i>Mesoflavibacter zeaxanthinifaciens</i> S86 | 0    | 1    | 0    | 2    | 0    | 1    | 0    |
| <i>Muricauda ruestringensis</i> B1(T)         | 0    | 0    | 0    | 2    | 0    | 1    | 0    |
| <i>Polaribacter irgensii</i> 23-P(T)          | 0    | 0    | 0    | 1    | 0    | 1    | 0    |
| <i>Polaribacter</i> sp. Hel1_33_49            | 0    | 0    | 0    | 1    | 0    | 1    | 0    |
| <i>Polaribacter</i> sp. Hel1_85               | 0    | 0    | 0    | 2    | 0    | 1    | 0    |
| <i>Polaribacter</i> sp. MED152                | 1    | 0    | 0    | 1    | 0    | 1    | 0    |
| <i>Psychroflexus gondwanensis</i> ACAM 44(T)  | 0    | 1    | 0    | 2    | 0    | 1    | 0    |
| <i>Psychroflexus torquis</i> 651(T)           | 0    | 0    | 0    | 2    | 0    | 1    | 0    |
| <i>Robiginitalea biformata</i> HTCC2501(T)    | 0    | 1    | 0    | 1    | 0    | 1    | 0    |
| <i>Zobellia galactanivorans</i> Dsij(T)       | 0    | 0    | 0    | 1    | 0    | 1    | 0    |
| <i>Zunogwangia profunda</i> SM-A87(T)         | 0    | 0    | 0    | 1    | 0    | 1    | 0    |

|                                               | GT32 | GT33 | GT34 | GT35 | GT36 | GT37 | GT38 |
|-----------------------------------------------|------|------|------|------|------|------|------|
| <i>Cellulophaga algicola</i> IC166(T)         | 0    | 0    | 0    | 0    | 0    | 0    | 0    |
| <i>Cellulophaga lytica</i> LIM-21(T)          | 0    | 0    | 0    | 0    | 0    | 0    | 0    |
| <i>Croceibacter atlanticus</i> HTCC2559(T)    | 0    | 0    | 0    | 0    | 0    | 0    | 0    |
| <i>Dokdonia donghaensis</i> MED134            | 0    | 0    | 0    | 0    | 0    | 0    | 0    |
| <i>Dokdonia</i> sp. 4H-3-7-5                  | 0    | 0    | 0    | 0    | 0    | 0    | 0    |
| <i>Flavobacteriaceae bacterium</i> S85        | 0    | 0    | 0    | 0    | 0    | 0    | 0    |
| <i>Flavobacterium johnsoniae</i> UW101(T)     | 0    | 0    | 0    | 0    | 0    | 0    | 0    |
| <i>Formosa agariphila</i> KMM 3901(T)         | 0    | 0    | 0    | 0    | 0    | 0    | 0    |
| <i>Gillisia limnaea</i> R-8282(T)             | 0    | 0    | 0    | 1    | 0    | 0    | 0    |
| <i>Gillisia</i> sp. CBA3202                   | 0    | 0    | 0    | 0    | 0    | 0    | 0    |
| <i>Gramella forsetii</i> ' KT0803             | 0    | 0    | 0    | 0    | 0    | 0    | 0    |
| <i>Imtechella halotolerans</i> K1(T)          | 0    | 0    | 0    | 0    | 0    | 0    | 0    |
| <i>Joostella marina</i> En5(T)                | 1    | 0    | 0    | 0    | 0    | 0    | 0    |
| <i>Kordia algicida</i> OT-1(T)                | 0    | 0    | 0    | 0    | 0    | 0    | 0    |
| <i>Leeuwenhoekiella blandensis</i> MED217(T)  | 0    | 0    | 0    | 0    | 0    | 0    | 0    |
| <i>Maribacter</i> sp. HTCC2170                | 0    | 0    | 0    | 0    | 0    | 0    | 0    |
| <i>Mesoflavibacter zeaxanthinifaciens</i> S86 | 0    | 0    | 0    | 0    | 0    | 0    | 0    |
| <i>Muricauda ruestringensis</i> B1(T)         | 0    | 0    | 0    | 0    | 0    | 0    | 0    |
| <i>Polaribacter irgensii</i> 23-P(T)          | 0    | 0    | 0    | 0    | 0    | 0    | 0    |
| <i>Polaribacter</i> sp. Hel1_33_49            | 0    | 0    | 0    | 0    | 0    | 0    | 0    |
| <i>Polaribacter</i> sp. Hel1_85               | 0    | 0    | 0    | 0    | 0    | 0    | 0    |
| <i>Polaribacter</i> sp. MED152                | 0    | 0    | 0    | 0    | 0    | 0    | 0    |
| <i>Psychroflexus gondwanensis</i> ACAM 44(T)  | 0    | 0    | 0    | 0    | 0    | 0    | 0    |
| <i>Psychroflexus torquis</i> 651(T)           | 0    | 0    | 0    | 0    | 0    | 0    | 0    |
| <i>Robiginitalea biformata</i> HTCC2501(T)    | 0    | 0    | 0    | 1    | 0    | 0    | 0    |
| <i>Zobellia galactanivorans</i> Dsij(T)       | 0    | 0    | 0    | 0    | 0    | 0    | 0    |
| <i>Zunogwangia profunda</i> SM-A87(T)         | 0    | 0    | 0    | 0    | 0    | 0    | 0    |

|                                               | GT39 | GT40 | GT41 | GT42 | GT43 | GT44 | GT45 |
|-----------------------------------------------|------|------|------|------|------|------|------|
| <i>Cellulophaga algicola</i> IC166(T)         | 1    | 0    | 0    | 0    | 0    | 0    | 0    |
| <i>Cellulophaga lytica</i> LIM-21(T)          | 1    | 0    | 0    | 0    | 0    | 0    | 0    |
| <i>Croceibacter atlanticus</i> HTCC2559(T)    | 1    | 0    | 0    | 0    | 0    | 0    | 0    |
| <i>Dokdonia donghaensis</i> MED134            | 1    | 0    | 0    | 0    | 0    | 0    | 0    |
| <i>Dokdonia</i> sp. 4H-3-7-5                  | 0    | 0    | 0    | 0    | 0    | 0    | 0    |
| <i>Flavobacteriaceae bacterium</i> S85        | 1    | 0    | 0    | 0    | 0    | 0    | 0    |
| <i>Flavobacterium johnsoniae</i> UW101(T)     | 0    | 0    | 0    | 0    | 0    | 0    | 0    |
| <i>Formosa agariphila</i> KMM 3901(T)         | 0    | 0    | 0    | 0    | 0    | 0    | 0    |
| <i>Gillisia limnaea</i> R-8282(T)             | 1    | 0    | 0    | 0    | 0    | 0    | 0    |
| <i>Gillisia</i> sp. CBA3202                   | 1    | 0    | 0    | 0    | 0    | 0    | 0    |
| <i>Gramella forsetii</i> ' KT0803             | 2    | 0    | 0    | 0    | 0    | 0    | 0    |
| <i>Imtechella halotolerans</i> K1(T)          | 3    | 0    | 0    | 0    | 0    | 0    | 0    |
| <i>Joostella marina</i> En5(T)                | 2    | 0    | 0    | 0    | 0    | 0    | 0    |
| <i>Kordia algicida</i> OT-1(T)                | 2    | 0    | 0    | 0    | 0    | 0    | 0    |
| <i>Leeuwenhoekiella blandensis</i> MED217(T)  | 1    | 0    | 0    | 0    | 0    | 0    | 0    |
| <i>Maribacter</i> sp. HTCC2170                | 1    | 0    | 0    | 0    | 0    | 0    | 0    |
| <i>Mesoflavibacter zeaxanthinifaciens</i> S86 | 0    | 0    | 0    | 0    | 0    | 0    | 0    |
| <i>Muricauda ruestringensis</i> B1(T)         | 2    | 0    | 0    | 0    | 0    | 0    | 0    |
| <i>Polaribacter irgensii</i> 23-P(T)          | 0    | 0    | 0    | 0    | 0    | 0    | 0    |
| <i>Polaribacter</i> sp. Hel1_33_49            | 0    | 0    | 0    | 0    | 0    | 0    | 0    |
| <i>Polaribacter</i> sp. Hel1_85               | 0    | 0    | 0    | 0    | 0    | 0    | 0    |
| <i>Polaribacter</i> sp. MED152                | 0    | 0    | 0    | 0    | 0    | 0    | 0    |
| <i>Psychroflexus gondwanensis</i> ACAM 44(T)  | 0    | 0    | 0    | 0    | 0    | 0    | 0    |
| <i>Psychroflexus torquis</i> 651(T)           | 0    | 0    | 0    | 0    | 0    | 0    | 0    |
| <i>Robiginitalea biformata</i> HTCC2501(T)    | 0    | 0    | 0    | 0    | 0    | 0    | 0    |
| <i>Zobellia galactanivorans</i> Dsij(T)       | 0    | 0    | 0    | 0    | 0    | 0    | 0    |
| <i>Zunogwangia profunda</i> SM-A87(T)         | 2    | 0    | 0    | 0    | 0    | 0    | 0    |

|                                               | GT46 | GT47 | GT48 | GT49 | GT50 | GT51 | GT52 |
|-----------------------------------------------|------|------|------|------|------|------|------|
| <i>Cellulophaga algicola</i> IC166(T)         | 0    | 0    | 0    | 0    | 0    | 4    | 0    |
| <i>Cellulophaga lytica</i> LIM-21(T)          | 0    | 0    | 0    | 0    | 0    | 3    | 0    |
| <i>Croceibacter atlanticus</i> HTCC2559(T)    | 0    | 0    | 0    | 0    | 0    | 2    | 0    |
| <i>Dokdonia donghaensis</i> MED134            | 0    | 1    | 0    | 0    | 0    | 1    | 0    |
| <i>Dokdonia</i> sp. 4H-3-7-5                  | 0    | 0    | 0    | 0    | 0    | 1    | 0    |
| <i>Flavobacteriaceae bacterium</i> S85        | 0    | 0    | 0    | 0    | 0    | 3    | 0    |
| <i>Flavobacterium johnsoniae</i> UW101(T)     | 0    | 0    | 0    | 0    | 0    | 4    | 0    |
| <i>Formosa agariphila</i> KMM 3901(T)         | 0    | 0    | 0    | 0    | 0    | 3    | 0    |
| <i>Gillisia limnaea</i> R-8282(T)             | 0    | 0    | 0    | 0    | 0    | 4    | 0    |
| <i>Gillisia</i> sp. CBA3202                   | 0    | 0    | 0    | 0    | 0    | 3    | 0    |
| <i>Gramella forsetii</i> ' KT0803             | 0    | 0    | 0    | 0    | 0    | 3    | 0    |
| <i>Imtechella halotolerans</i> K1(T)          | 0    | 0    | 0    | 0    | 0    | 3    | 0    |
| <i>Joostella marina</i> En5(T)                | 0    | 0    | 0    | 0    | 0    | 4    | 0    |
| <i>Kordia algicida</i> OT-1(T)                | 0    | 1    | 0    | 0    | 0    | 2    | 0    |
| <i>Leeuwenhoekiella blandensis</i> MED217(T)  | 0    | 0    | 0    | 0    | 0    | 3    | 0    |
| <i>Maribacter</i> sp. HTCC2170                | 0    | 0    | 0    | 0    | 0    | 2    | 0    |
| <i>Mesoflavibacter zeaxanthinifaciens</i> S86 | 0    | 0    | 0    | 0    | 0    | 3    | 0    |
| <i>Muricauda ruestringensis</i> B1(T)         | 0    | 0    | 0    | 0    | 0    | 2    | 0    |
| <i>Polaribacter irgensii</i> 23-P(T)          | 0    | 0    | 0    | 0    | 0    | 1    | 0    |
| <i>Polaribacter</i> sp. Hel1_33_49            | 0    | 0    | 0    | 0    | 0    | 1    | 0    |
| <i>Polaribacter</i> sp. Hel1_85               | 0    | 0    | 0    | 0    | 0    | 1    | 0    |
| <i>Polaribacter</i> sp. MED152                | 0    | 0    | 0    | 0    | 0    | 1    | 0    |
| <i>Psychroflexus gondwanensis</i> ACAM 44(T)  | 0    | 1    | 0    | 0    | 0    | 3    | 0    |
| <i>Psychroflexus torquis</i> 651(T)           | 0    | 0    | 0    | 0    | 0    | 3    | 0    |
| <i>Robiginitalea biformata</i> HTCC2501(T)    | 0    | 0    | 0    | 0    | 0    | 2    | 0    |
| <i>Zobellia galactanivorans</i> Dsij(T)       | 0    | 0    | 0    | 0    | 0    | 3    | 0    |
| <i>Zunogwangia profunda</i> SM-A87(T)         | 0    | 0    | 0    | 0    | 0    | 3    | 0    |

|                                               | GT53 | GT54 | GT55 | GT56 | GT57 | GT58 | GT59 |
|-----------------------------------------------|------|------|------|------|------|------|------|
| <i>Cellulophaga algicola</i> IC166(T)         | 0    | 0    | 0    | 0    | 0    | 0    | 0    |
| <i>Cellulophaga lytica</i> LIM-21(T)          | 0    | 0    | 0    | 0    | 0    | 0    | 0    |
| <i>Croceibacter atlanticus</i> HTCC2559(T)    | 0    | 0    | 0    | 0    | 0    | 0    | 0    |
| <i>Dokdonia donghaensis</i> MED134            | 0    | 0    | 0    | 0    | 0    | 0    | 0    |
| <i>Dokdonia</i> sp. 4H-3-7-5                  | 0    | 0    | 0    | 0    | 0    | 0    | 0    |
| <i>Flavobacteriaceae bacterium</i> S85        | 0    | 0    | 0    | 0    | 0    | 0    | 0    |
| <i>Flavobacterium johnsoniae</i> UW101(T)     | 0    | 0    | 0    | 0    | 0    | 0    | 0    |
| <i>Formosa agariphila</i> KMM 3901(T)         | 0    | 0    | 0    | 0    | 0    | 0    | 0    |
| <i>Gillisia limnaea</i> R-8282(T)             | 0    | 0    | 0    | 0    | 0    | 0    | 0    |
| <i>Gillisia</i> sp. CBA3202                   | 0    | 0    | 0    | 0    | 0    | 0    | 0    |
| <i>Gramella forsetii</i> ' KT0803             | 0    | 0    | 0    | 0    | 0    | 0    | 0    |
| <i>Imtechella halotolerans</i> K1(T)          | 0    | 0    | 0    | 0    | 0    | 0    | 0    |
| <i>Joostella marina</i> En5(T)                | 0    | 0    | 0    | 0    | 0    | 0    | 0    |
| <i>Kordia algicida</i> OT-1(T)                | 0    | 0    | 0    | 0    | 0    | 0    | 0    |
| <i>Leeuwenhoekiella blandensis</i> MED217(T)  | 0    | 0    | 0    | 0    | 0    | 0    | 0    |
| <i>Maribacter</i> sp. HTCC2170                | 0    | 0    | 0    | 0    | 0    | 0    | 0    |
| <i>Mesoflavibacter zeaxanthinifaciens</i> S86 | 0    | 0    | 0    | 0    | 0    | 0    | 0    |
| <i>Muricauda ruestringensis</i> B1(T)         | 0    | 0    | 0    | 0    | 0    | 0    | 0    |
| <i>Polaribacter irgensii</i> 23-P(T)          | 0    | 0    | 0    | 0    | 0    | 0    | 0    |
| <i>Polaribacter</i> sp. Hel1_33_49            | 0    | 0    | 0    | 0    | 0    | 0    | 0    |
| <i>Polaribacter</i> sp. Hel1_85               | 0    | 0    | 0    | 0    | 0    | 0    | 0    |
| <i>Polaribacter</i> sp. MED152                | 0    | 0    | 0    | 0    | 0    | 0    | 0    |
| <i>Psychroflexus gondwanensis</i> ACAM 44(T)  | 0    | 0    | 0    | 0    | 0    | 0    | 0    |
| <i>Psychroflexus torquis</i> 651(T)           | 0    | 0    | 0    | 0    | 0    | 0    | 0    |
| <i>Robiginitalea biformata</i> HTCC2501(T)    | 0    | 0    | 0    | 0    | 0    | 0    | 0    |
| <i>Zobellia galactanivorans</i> Dsij(T)       | 0    | 0    | 0    | 0    | 0    | 0    | 0    |
| <i>Zunogwangia profunda</i> SM-A87(T)         | 0    | 0    | 0    | 0    | 0    | 0    | 0    |

|                                               | GT60 | GT61 | GT62 | GT63 | GT64 | GT65 | GT66 |
|-----------------------------------------------|------|------|------|------|------|------|------|
| <i>Cellulophaga algicola</i> IC166(T)         | 0    | 0    | 0    | 0    | 0    | 0    | 0    |
| <i>Cellulophaga lytica</i> LIM-21(T)          | 0    | 0    | 0    | 0    | 0    | 0    | 0    |
| <i>Croceibacter atlanticus</i> HTCC2559(T)    | 0    | 0    | 0    | 0    | 0    | 0    | 0    |
| <i>Dokdonia donghaensis</i> MED134            | 0    | 0    | 0    | 0    | 0    | 0    | 0    |
| <i>Dokdonia</i> sp. 4H-3-7-5                  | 0    | 0    | 0    | 0    | 0    | 0    | 0    |
| <i>Flavobacteriaceae bacterium</i> S85        | 0    | 0    | 0    | 0    | 0    | 0    | 0    |
| <i>Flavobacterium johnsoniae</i> UW101(T)     | 0    | 0    | 0    | 0    | 1    | 0    | 0    |
| <i>Formosa agariphila</i> KMM 3901(T)         | 0    | 0    | 0    | 0    | 0    | 0    | 0    |
| <i>Gillisia limnaea</i> R-8282(T)             | 0    | 0    | 0    | 0    | 0    | 0    | 0    |
| <i>Gillisia</i> sp. CBA3202                   | 0    | 0    | 0    | 0    | 0    | 0    | 0    |
| <i>Gramella forsetii</i> ' KT0803             | 0    | 0    | 0    | 0    | 0    | 0    | 0    |
| <i>Imtechella halotolerans</i> K1(T)          | 0    | 0    | 0    | 0    | 0    | 0    | 0    |
| <i>Joostella marina</i> En5(T)                | 0    | 0    | 0    | 0    | 0    | 0    | 0    |
| <i>Kordia algicida</i> OT-1(T)                | 0    | 0    | 0    | 0    | 0    | 0    | 0    |
| <i>Leeuwenhoekiella blandensis</i> MED217(T)  | 0    | 0    | 0    | 0    | 0    | 0    | 0    |
| <i>Maribacter</i> sp. HTCC2170                | 0    | 0    | 0    | 0    | 0    | 0    | 0    |
| <i>Mesoflavibacter zeaxanthinifaciens</i> S86 | 0    | 0    | 0    | 0    | 0    | 0    | 0    |
| <i>Muricauda ruestringensis</i> B1(T)         | 0    | 0    | 0    | 0    | 0    | 0    | 0    |
| <i>Polaribacter irgensii</i> 23-P(T)          | 0    | 0    | 0    | 0    | 0    | 0    | 0    |
| <i>Polaribacter</i> sp. Hel1_33_49            | 0    | 0    | 0    | 0    | 0    | 0    | 0    |
| <i>Polaribacter</i> sp. Hel1_85               | 0    | 0    | 0    | 0    | 0    | 0    | 0    |
| <i>Polaribacter</i> sp. MED152                | 0    | 0    | 0    | 0    | 0    | 0    | 0    |
| <i>Psychroflexus gondwanensis</i> ACAM 44(T)  | 0    | 0    | 0    | 0    | 0    | 0    | 0    |
| <i>Psychroflexus torquis</i> 651(T)           | 0    | 0    | 0    | 0    | 0    | 0    | 0    |
| <i>Robiginitalea biformata</i> HTCC2501(T)    | 0    | 0    | 0    | 0    | 0    | 0    | 0    |
| <i>Zobellia galactanivorans</i> Dsij(T)       | 0    | 0    | 0    | 0    | 0    | 0    | 0    |
| <i>Zunogwangia profunda</i> SM-A87(T)         | 0    | 0    | 0    | 0    | 0    | 0    | 0    |

|                                               | GT67 | GT68 | GT69 | GT70 | GT71 | GT72 | GT73 |
|-----------------------------------------------|------|------|------|------|------|------|------|
| <i>Cellulophaga algicola</i> IC166(T)         | 0    | 0    | 0    | 0    | 0    | 0    | 0    |
| <i>Cellulophaga lytica</i> LIM-21(T)          | 0    | 0    | 0    | 0    | 0    | 0    | 0    |
| <i>Croceibacter atlanticus</i> HTCC2559(T)    | 0    | 0    | 0    | 0    | 0    | 0    | 0    |
| <i>Dokdonia donghaensis</i> MED134            | 0    | 0    | 0    | 0    | 0    | 0    | 0    |
| <i>Dokdonia</i> sp. 4H-3-7-5                  | 0    | 0    | 0    | 0    | 0    | 0    | 0    |
| <i>Flavobacteriaceae bacterium</i> S85        | 0    | 0    | 0    | 0    | 0    | 0    | 0    |
| <i>Flavobacterium johnsoniae</i> UW101(T)     | 0    | 0    | 0    | 0    | 0    | 0    | 0    |
| <i>Formosa agariphila</i> KMM 3901(T)         | 0    | 0    | 0    | 0    | 0    | 0    | 0    |
| <i>Gillisia limnaea</i> R-8282(T)             | 0    | 0    | 0    | 0    | 0    | 0    | 0    |
| <i>Gillisia</i> sp. CBA3202                   | 0    | 0    | 0    | 0    | 0    | 0    | 0    |
| <i>Gramella forsetii</i> ' KT0803             | 0    | 0    | 0    | 0    | 0    | 0    | 0    |
| <i>Imtechella halotolerans</i> K1(T)          | 0    | 0    | 0    | 0    | 0    | 0    | 0    |
| <i>Joostella marina</i> En5(T)                | 0    | 0    | 0    | 0    | 0    | 0    | 0    |
| <i>Kordia algicida</i> OT-1(T)                | 0    | 0    | 0    | 0    | 0    | 0    | 0    |
| <i>Leeuwenhoekiella blandensis</i> MED217(T)  | 0    | 0    | 0    | 0    | 0    | 0    | 0    |
| <i>Maribacter</i> sp. HTCC2170                | 0    | 0    | 0    | 0    | 0    | 0    | 0    |
| <i>Mesoflavibacter zeaxanthinifaciens</i> S86 | 0    | 0    | 0    | 0    | 0    | 0    | 0    |
| <i>Muricauda ruestringensis</i> B1(T)         | 0    | 0    | 0    | 0    | 0    | 0    | 0    |
| <i>Polaribacter irgensii</i> 23-P(T)          | 0    | 0    | 0    | 0    | 0    | 0    | 0    |
| <i>Polaribacter</i> sp. Hel1_33_49            | 0    | 0    | 0    | 0    | 0    | 0    | 0    |
| <i>Polaribacter</i> sp. Hel1_85               | 0    | 0    | 0    | 0    | 0    | 0    | 0    |
| <i>Polaribacter</i> sp. MED152                | 0    | 0    | 0    | 0    | 0    | 0    | 0    |
| <i>Psychroflexus gondwanensis</i> ACAM 44(T)  | 0    | 0    | 0    | 0    | 0    | 0    | 0    |
| <i>Psychroflexus torquis</i> 651(T)           | 0    | 0    | 0    | 0    | 0    | 0    | 0    |
| <i>Robiginitalea biformata</i> HTCC2501(T)    | 0    | 0    | 0    | 0    | 0    | 0    | 0    |
| <i>Zobellia galactanivorans</i> Dsij(T)       | 0    | 0    | 0    | 0    | 0    | 0    | 0    |
| <i>Zunogwangia profunda</i> SM-A87(T)         | 0    | 0    | 0    | 0    | 0    | 0    | 0    |



|                                               | GT74 | GT75 | GT76 | GT77 | GT78 | GT79 | GT80 |
|-----------------------------------------------|------|------|------|------|------|------|------|
| <i>Cellulophaga algicola</i> IC166(T)         | 0    | 0    | 0    | 0    | 0    | 0    | 0    |
| <i>Cellulophaga lytica</i> LIM-21(T)          | 0    | 0    | 0    | 0    | 0    | 0    | 0    |
| <i>Croceibacter atlanticus</i> HTCC2559(T)    | 0    | 0    | 0    | 0    | 0    | 0    | 0    |
| <i>Dokdonia donghaensis</i> MED134            | 0    | 0    | 0    | 0    | 0    | 0    | 0    |
| <i>Dokdonia</i> sp. 4H-3-7-5                  | 0    | 0    | 0    | 0    | 0    | 0    | 0    |
| <i>Flavobacteriaceae bacterium</i> S85        | 0    | 0    | 0    | 0    | 0    | 0    | 0    |
| <i>Flavobacterium johnsoniae</i> UW101(T)     | 0    | 0    | 0    | 0    | 0    | 0    | 0    |
| <i>Formosa agariphila</i> KMM 3901(T)         | 0    | 0    | 0    | 0    | 0    | 0    | 0    |
| <i>Gillisia limnaea</i> R-8282(T)             | 0    | 0    | 0    | 0    | 0    | 0    | 0    |
| <i>Gillisia</i> sp. CBA3202                   | 0    | 0    | 0    | 0    | 0    | 0    | 0    |
| <i>Gramella forsetii</i> ' KT0803             | 1    | 0    | 0    | 0    | 0    | 0    | 0    |
| <i>Imtechella halotolerans</i> K1(T)          | 0    | 0    | 0    | 0    | 0    | 0    | 0    |
| <i>Joostella marina</i> En5(T)                | 0    | 0    | 0    | 0    | 0    | 0    | 0    |
| <i>Kordia algicida</i> OT-1(T)                | 0    | 0    | 0    | 0    | 0    | 0    | 0    |
| <i>Leeuwenhoekiella blandensis</i> MED217(T)  | 0    | 0    | 0    | 0    | 0    | 0    | 0    |
| <i>Maribacter</i> sp. HTCC2170                | 0    | 0    | 0    | 0    | 0    | 0    | 0    |
| <i>Mesoflavibacter zeaxanthinifaciens</i> S86 | 0    | 0    | 0    | 0    | 0    | 0    | 0    |
| <i>Muricauda ruestringensis</i> B1(T)         | 0    | 0    | 0    | 0    | 0    | 0    | 0    |
| <i>Polaribacter irgensii</i> 23-P(T)          | 0    | 0    | 0    | 0    | 0    | 0    | 0    |
| <i>Polaribacter</i> sp. Hel1_33_49            | 0    | 0    | 0    | 0    | 0    | 0    | 0    |
| <i>Polaribacter</i> sp. Hel1_85               | 0    | 0    | 0    | 0    | 0    | 0    | 0    |
| <i>Polaribacter</i> sp. MED152                | 0    | 0    | 0    | 0    | 0    | 0    | 0    |
| <i>Psychroflexus gondwanensis</i> ACAM 44(T)  | 0    | 0    | 0    | 0    | 0    | 0    | 0    |
| <i>Psychroflexus torquis</i> 651(T)           | 0    | 0    | 0    | 0    | 0    | 0    | 0    |
| <i>Robiginitalea biformata</i> HTCC2501(T)    | 0    | 0    | 0    | 0    | 0    | 0    | 0    |
| <i>Zobellia galactanivorans</i> Dsij(T)       | 0    | 0    | 0    | 0    | 0    | 0    | 0    |
| <i>Zunogwangia profunda</i> SM-A87(T)         | 0    | 0    | 0    | 0    | 0    | 0    | 0    |

|                                               | GT81 | GT82 | GT83 | GT84 | GT85 | GT86 | GT87 |
|-----------------------------------------------|------|------|------|------|------|------|------|
| <i>Cellulophaga algicola</i> IC166(T)         | 0    | 0    | 2    | 0    | 0    | 0    | 0    |
| <i>Cellulophaga lytica</i> LIM-21(T)          | 0    | 0    | 1    | 0    | 0    | 0    | 0    |
| <i>Croceibacter atlanticus</i> HTCC2559(T)    | 0    | 0    | 1    | 0    | 0    | 0    | 0    |
| <i>Dokdonia donghaensis</i> MED134            | 0    | 0    | 1    | 0    | 0    | 0    | 0    |
| <i>Dokdonia</i> sp. 4H-3-7-5                  | 0    | 0    | 0    | 0    | 0    | 0    | 0    |
| <i>Flavobacteriaceae bacterium</i> S85        | 1    | 0    | 2    | 0    | 0    | 0    | 0    |
| <i>Flavobacterium johnsoniae</i> UW101(T)     | 0    | 0    | 0    | 0    | 0    | 0    | 0    |
| <i>Formosa agariphila</i> KMM 3901(T)         | 0    | 0    | 1    | 0    | 0    | 0    | 0    |
| <i>Gillisia limnaea</i> R-8282(T)             | 0    | 0    | 1    | 1    | 0    | 0    | 0    |
| <i>Gillisia</i> sp. CBA3202                   | 0    | 0    | 2    | 0    | 0    | 0    | 0    |
| <i>Gramella forsetii</i> ' KT0803             | 0    | 0    | 2    | 0    | 0    | 0    | 0    |
| <i>Imtechella halotolerans</i> K1(T)          | 0    | 0    | 2    | 0    | 0    | 0    | 0    |
| <i>Joostella marina</i> En5(T)                | 0    | 0    | 3    | 0    | 0    | 0    | 0    |
| <i>Kordia algicida</i> OT-1(T)                | 0    | 0    | 1    | 0    | 0    | 0    | 0    |
| <i>Leeuwenhoekiella blandensis</i> MED217(T)  | 0    | 0    | 2    | 0    | 0    | 0    | 0    |
| <i>Maribacter</i> sp. HTCC2170                | 0    | 0    | 1    | 0    | 0    | 0    | 0    |
| <i>Mesoflavibacter zeaxanthinifaciens</i> S86 | 0    | 0    | 2    | 0    | 0    | 0    | 0    |
| <i>Muricauda ruestringensis</i> B1(T)         | 0    | 0    | 3    | 0    | 0    | 0    | 0    |
| <i>Polaribacter irgensii</i> 23-P(T)          | 0    | 0    | 1    | 0    | 0    | 0    | 0    |
| <i>Polaribacter</i> sp. Hel1_33_49            | 0    | 0    | 1    | 0    | 0    | 0    | 0    |
| <i>Polaribacter</i> sp. Hel1_85               | 0    | 0    | 1    | 0    | 0    | 0    | 0    |
| <i>Polaribacter</i> sp. MED152                | 0    | 0    | 1    | 0    | 0    | 0    | 0    |
| <i>Psychroflexus gondwanensis</i> ACAM 44(T)  | 0    | 0    | 1    | 0    | 0    | 0    | 0    |
| <i>Psychroflexus torquis</i> 651(T)           | 0    | 0    | 1    | 0    | 0    | 0    | 0    |
| <i>Robiginitalea biformata</i> HTCC2501(T)    | 0    | 0    | 2    | 0    | 0    | 0    | 0    |
| <i>Zobellia galactanivorans</i> Dsij(T)       | 0    | 0    | 3    | 0    | 0    | 0    | 0    |
| <i>Zunogwangia profunda</i> SM-A87(T)         | 0    | 0    | 2    | 0    | 0    | 0    | 0    |

|                                               | GT88 | GT89 | GT90 | GT91 | GT92 | GT93 | GT94 |
|-----------------------------------------------|------|------|------|------|------|------|------|
| <i>Cellulophaga algicola</i> IC166(T)         | 0    | 0    | 0    | 0    | 0    | 0    | 0    |
| <i>Cellulophaga lytica</i> LIM-21(T)          | 0    | 0    | 1    | 0    | 0    | 0    | 0    |
| <i>Croceibacter atlanticus</i> HTCC2559(T)    | 0    | 0    | 0    | 0    | 0    | 0    | 0    |
| <i>Dokdonia donghaensis</i> MED134            | 0    | 0    | 0    | 0    | 0    | 0    | 0    |
| <i>Dokdonia</i> sp. 4H-3-7-5                  | 0    | 0    | 0    | 0    | 0    | 0    | 0    |
| <i>Flavobacteriaceae bacterium</i> S85        | 0    | 0    | 0    | 0    | 0    | 0    | 0    |
| <i>Flavobacterium johnsoniae</i> UW101(T)     | 0    | 0    | 0    | 0    | 0    | 0    | 0    |
| <i>Formosa agariphila</i> KMM 3901(T)         | 0    | 0    | 0    | 0    | 0    | 0    | 0    |
| <i>Gillisia limnaea</i> R-8282(T)             | 0    | 0    | 0    | 0    | 0    | 0    | 0    |
| <i>Gillisia</i> sp. CBA3202                   | 0    | 0    | 0    | 0    | 0    | 0    | 0    |
| <i>Gramella forsetii</i> ' KT0803             | 0    | 0    | 0    | 0    | 0    | 0    | 0    |
| <i>Imtechella halotolerans</i> K1(T)          | 0    | 0    | 0    | 0    | 0    | 0    | 0    |
| <i>Joostella marina</i> En5(T)                | 0    | 0    | 0    | 0    | 0    | 0    | 0    |
| <i>Kordia algicida</i> OT-1(T)                | 0    | 0    | 0    | 0    | 0    | 0    | 0    |
| <i>Leeuwenhoekiella blandensis</i> MED217(T)  | 0    | 0    | 0    | 0    | 0    | 0    | 0    |
| <i>Maribacter</i> sp. HTCC2170                | 0    | 0    | 0    | 0    | 0    | 0    | 0    |
| <i>Mesoflavibacter zeaxanthinifaciens</i> S86 | 0    | 0    | 0    | 0    | 0    | 0    | 0    |
| <i>Muricauda ruestringensis</i> B1(T)         | 0    | 0    | 0    | 0    | 0    | 0    | 0    |
| <i>Polaribacter irgensii</i> 23-P(T)          | 0    | 0    | 0    | 0    | 0    | 0    | 0    |
| <i>Polaribacter</i> sp. Hel1_33_49            | 0    | 0    | 0    | 0    | 0    | 0    | 0    |
| <i>Polaribacter</i> sp. Hel1_85               | 0    | 0    | 0    | 0    | 0    | 0    | 0    |
| <i>Polaribacter</i> sp. MED152                | 0    | 0    | 0    | 0    | 0    | 0    | 0    |
| <i>Psychroflexus gondwanensis</i> ACAM 44(T)  | 0    | 0    | 0    | 0    | 0    | 0    | 0    |
| <i>Psychroflexus torquis</i> 651(T)           | 0    | 0    | 0    | 0    | 0    | 0    | 0    |
| <i>Robiginitalea biformata</i> HTCC2501(T)    | 0    | 0    | 0    | 0    | 0    | 0    | 0    |
| <i>Zobellia galactanivorans</i> Dsij(T)       | 0    | 0    | 0    | 0    | 0    | 0    | 0    |
| <i>Zunogwangia profunda</i> SM-A87(T)         | 0    | 0    | 0    | 0    | 0    | 0    | 0    |

|                                               | PL1 | PL2 | PL3 | PL4 | PL5 | PL6 | PL7 |
|-----------------------------------------------|-----|-----|-----|-----|-----|-----|-----|
| <i>Cellulophaga algicola</i> IC166(T)         | 0   | 0   | 0   | 0   | 0   | 2   | 4   |
| <i>Cellulophaga lytica</i> LIM-21(T)          | 0   | 0   | 0   | 0   | 0   | 1   | 2   |
| <i>Croceibacter atlanticus</i> HTCC2559(T)    | 0   | 0   | 0   | 0   | 0   | 1   | 3   |
| <i>Dokdonia donghaensis</i> MED134            | 0   | 0   | 0   | 0   | 0   | 1   | 2   |
| <i>Dokdonia</i> sp. 4H-3-7-5                  | 0   | 0   | 0   | 0   | 0   | 1   | 1   |
| <i>Flavobacteriaceae bacterium</i> S85        | 0   | 0   | 0   | 0   | 0   | 1   | 2   |
| <i>Flavobacterium johnsoniae</i> UW101(T)     | 7   | 0   | 0   | 0   | 0   | 0   | 0   |
| <i>Formosa agariphila</i> KMM 3901(T)         | 0   | 0   | 0   | 0   | 0   | 4   | 4   |
| <i>Gillisia limnaea</i> R-8282(T)             | 0   | 0   | 0   | 0   | 0   | 0   | 0   |
| <i>Gillisia</i> sp. CBA3202                   | 0   | 0   | 0   | 0   | 0   | 0   | 0   |
| <i>Gramella forsetii</i> ' KT0803             | 0   | 0   | 0   | 0   | 0   | 1   | 4   |
| <i>Imtechella halotolerans</i> K1(T)          | 0   | 0   | 0   | 0   | 0   | 0   | 0   |
| <i>Joostella marina</i> En5(T)                | 2   | 0   | 0   | 0   | 0   | 0   | 0   |
| <i>Kordia algicida</i> OT-1(T)                | 0   | 0   | 0   | 0   | 0   | 0   | 4   |
| <i>Leeuwenhoekiella blandensis</i> MED217(T)  | 0   | 0   | 0   | 1   | 0   | 0   | 0   |
| <i>Maribacter</i> sp. HTCC2170                | 1   | 0   | 0   | 0   | 0   | 0   | 0   |
| <i>Mesoflavibacter zeaxanthinifaciens</i> S86 | 0   | 0   | 0   | 0   | 0   | 1   | 2   |
| <i>Muricauda ruestringensis</i> B1(T)         | 1   | 0   | 0   | 0   | 0   | 0   | 0   |
| <i>Polaribacter irgensii</i> 23-P(T)          | 0   | 0   | 0   | 0   | 0   | 0   | 0   |
| <i>Polaribacter</i> sp. Hel1_33_49            | 0   | 0   | 0   | 0   | 0   | 0   | 0   |
| <i>Polaribacter</i> sp. Hel1_85               | 0   | 0   | 0   | 0   | 0   | 4   | 5   |
| <i>Polaribacter</i> sp. MED152                | 0   | 0   | 0   | 0   | 0   | 4   | 3   |
| <i>Psychroflexus gondwanensis</i> ACAM 44(T)  | 0   | 0   | 0   | 0   | 0   | 0   | 0   |
| <i>Psychroflexus torquis</i> 651(T)           | 0   | 0   | 0   | 0   | 0   | 0   | 0   |
| <i>Robiginitalea biformata</i> HTCC2501(T)    | 0   | 0   | 0   | 0   | 0   | 0   | 0   |
| <i>Zobellia galactanivorans</i> Dsij(T)       | 2   | 0   | 0   | 0   | 0   | 2   | 3   |
| <i>Zunogwangia profunda</i> SM-A87(T)         | 0   | 0   | 0   | 0   | 0   | 0   | 0   |

|                                               | PL8 | PL9 | PL10 | PL11 | PL12 | PL13 | PL14 |
|-----------------------------------------------|-----|-----|------|------|------|------|------|
| <i>Cellulophaga algicola</i> IC166(T)         | 0   | 0   | 0    | 0    | 1    | 0    | 0    |
| <i>Cellulophaga lytica</i> LIM-21(T)          | 0   | 0   | 0    | 0    | 0    | 0    | 0    |
| <i>Croceibacter atlanticus</i> HTCC2559(T)    | 0   | 0   | 0    | 0    | 0    | 0    | 0    |
| <i>Dokdonia donghaensis</i> MED134            | 0   | 0   | 0    | 0    | 2    | 0    | 0    |
| <i>Dokdonia</i> sp. 4H-3-7-5                  | 0   | 0   | 0    | 0    | 1    | 0    | 0    |
| <i>Flavobacteriaceae bacterium</i> S85        | 1   | 0   | 0    | 0    | 0    | 0    | 0    |
| <i>Flavobacterium johnsoniae</i> UW101(T)     | 0   | 0   | 2    | 1    | 0    | 0    | 1    |
| <i>Formosa agariphila</i> KMM 3901(T)         | 1   | 0   | 0    | 0    | 1    | 0    | 0    |
| <i>Gillisia limnaea</i> R-8282(T)             | 0   | 0   | 0    | 0    | 0    | 0    | 0    |
| <i>Gillisia</i> sp. CBA3202                   | 0   | 0   | 0    | 0    | 0    | 0    | 0    |
| <i>Gramella forsetii</i> ' KT0803             | 0   | 0   | 0    | 0    | 0    | 0    | 0    |
| <i>Imtechella halotolerans</i> K1(T)          | 0   | 0   | 0    | 0    | 0    | 0    | 1    |
| <i>Joostella marina</i> En5(T)                | 0   | 0   | 0    | 1    | 0    | 0    | 0    |
| <i>Kordia algicida</i> OT-1(T)                | 0   | 0   | 0    | 0    | 2    | 0    | 0    |
| <i>Leeuwenhoekiella blandensis</i> MED217(T)  | 0   | 0   | 1    | 2    | 0    | 0    | 0    |
| <i>Maribacter</i> sp. HTCC2170                | 0   | 0   | 0    | 0    | 0    | 0    | 0    |
| <i>Mesoflavibacter zeaxanthinifaciens</i> S86 | 0   | 0   | 1    | 0    | 0    | 0    | 0    |
| <i>Muricauda ruestringensis</i> B1(T)         | 0   | 0   | 0    | 0    | 0    | 0    | 0    |
| <i>Polaribacter irgensii</i> 23-P(T)          | 0   | 0   | 0    | 0    | 0    | 0    | 0    |
| <i>Polaribacter</i> sp. Hel1_33_49            | 0   | 0   | 0    | 0    | 0    | 0    | 0    |
| <i>Polaribacter</i> sp. Hel1_85               | 0   | 0   | 0    | 0    | 0    | 0    | 0    |
| <i>Polaribacter</i> sp. MED152                | 0   | 0   | 0    | 0    | 0    | 0    | 0    |
| <i>Psychroflexus gondwanensis</i> ACAM 44(T)  | 0   | 0   | 0    | 0    | 0    | 0    | 0    |
| <i>Psychroflexus torquis</i> 651(T)           | 0   | 0   | 0    | 0    | 0    | 0    | 0    |
| <i>Robiginitalea biformata</i> HTCC2501(T)    | 0   | 0   | 0    | 0    | 0    | 0    | 0    |
| <i>Zobellia galactanivorans</i> Dsij(T)       | 0   | 0   | 0    | 0    | 1    | 0    | 1    |
| <i>Zunogwangia profunda</i> SM-A87(T)         | 0   | 0   | 0    | 0    | 0    | 0    | 0    |

|                                               | PL15 | PL16 | PL17 | PL18 | PL19 | PL20 | PL21 |
|-----------------------------------------------|------|------|------|------|------|------|------|
| <i>Cellulophaga algicola</i> IC166(T)         | 0    | 0    | 1    | 0    | 0    | 0    | 0    |
| <i>Cellulophaga lytica</i> LIM-21(T)          | 0    | 0    | 1    | 0    | 0    | 0    | 0    |
| <i>Croceibacter atlanticus</i> HTCC2559(T)    | 0    | 0    | 1    | 0    | 0    | 0    | 0    |
| <i>Dokdonia donghaensis</i> MED134            | 0    | 0    | 1    | 0    | 0    | 0    | 0    |
| <i>Dokdonia</i> sp. 4H-3-7-5                  | 0    | 0    | 1    | 0    | 0    | 0    | 0    |
| <i>Flavobacteriaceae bacterium</i> S85        | 0    | 0    | 1    | 0    | 0    | 0    | 0    |
| <i>Flavobacterium johnsoniae</i> UW101(T)     | 0    | 0    | 0    | 0    | 0    | 0    | 0    |
| <i>Formosa agariphila</i> KMM 3901(T)         | 0    | 0    | 1    | 0    | 0    | 0    | 0    |
| <i>Gillisia limnaea</i> R-8282(T)             | 0    | 0    | 0    | 0    | 0    | 0    | 0    |
| <i>Gillisia</i> sp. CBA3202                   | 0    | 0    | 0    | 0    | 0    | 0    | 0    |
| <i>Gramella forsetii</i> ' KT0803             | 0    | 0    | 1    | 0    | 0    | 0    | 0    |
| <i>Imtechella halotolerans</i> K1(T)          | 0    | 0    | 0    | 0    | 0    | 0    | 0    |
| <i>Joostella marina</i> En5(T)                | 0    | 0    | 0    | 0    | 0    | 0    | 0    |
| <i>Kordia algicida</i> OT-1(T)                | 0    | 0    | 0    | 0    | 0    | 0    | 0    |
| <i>Leeuwenhoekiella blandensis</i> MED217(T)  | 0    | 0    | 0    | 0    | 0    | 0    | 0    |
| <i>Maribacter</i> sp. HTCC2170                | 0    | 0    | 0    | 0    | 0    | 0    | 0    |
| <i>Mesoflavibacter zeaxanthinifaciens</i> S86 | 0    | 0    | 1    | 0    | 0    | 0    | 0    |
| <i>Muricauda ruestringensis</i> B1(T)         | 0    | 0    | 0    | 0    | 0    | 0    | 0    |
| <i>Polaribacter irgensii</i> 23-P(T)          | 0    | 0    | 0    | 0    | 0    | 0    | 0    |
| <i>Polaribacter</i> sp. Hel1_33_49            | 0    | 0    | 0    | 0    | 0    | 0    | 0    |
| <i>Polaribacter</i> sp. Hel1_85               | 0    | 0    | 1    | 0    | 0    | 0    | 0    |
| <i>Polaribacter</i> sp. MED152                | 0    | 0    | 1    | 0    | 0    | 0    | 0    |
| <i>Psychroflexus gondwanensis</i> ACAM 44(T)  | 0    | 0    | 0    | 0    | 0    | 0    | 0    |
| <i>Psychroflexus torquis</i> 651(T)           | 0    | 0    | 0    | 0    | 0    | 0    | 0    |
| <i>Robiginitalea biformata</i> HTCC2501(T)    | 0    | 0    | 0    | 0    | 0    | 0    | 0    |
| <i>Zobellia galactanivorans</i> Dsij(T)       | 0    | 0    | 1    | 0    | 0    | 0    | 0    |
| <i>Zunogwangia profunda</i> SM-A87(T)         | 0    | 0    | 0    | 0    | 0    | 0    | 0    |

|                                               | PL22 | PL23 |
|-----------------------------------------------|------|------|
| <i>Cellulophaga algicola</i> IC166(T)         | 0    | 0    |
| <i>Cellulophaga lytica</i> LIM-21(T)          | 0    | 0    |
| <i>Croceibacter atlanticus</i> HTCC2559(T)    | 0    | 0    |
| <i>Dokdonia donghaensis</i> MED134            | 0    | 0    |
| <i>Dokdonia</i> sp. 4H-3-7-5                  | 0    | 0    |
| <i>Flavobacteriaceae bacterium</i> S85        | 0    | 0    |
| <i>Flavobacterium johnsoniae</i> UW101(T)     | 0    | 0    |
| <i>Formosa agariphila</i> KMM 3901(T)         | 0    | 0    |
| <i>Gillisia limnaea</i> R-8282(T)             | 0    | 0    |
| <i>Gillisia</i> sp. CBA3202                   | 0    | 0    |
| <i>Gramella forsetii</i> ' KT0803             | 0    | 0    |
| <i>Imtechella halotolerans</i> K1(T)          | 0    | 0    |
| <i>Joostella marina</i> En5(T)                | 0    | 0    |
| <i>Kordia algicida</i> OT-1(T)                | 0    | 0    |
| <i>Leeuwenhoekiella blandensis</i> MED217(T)  | 0    | 0    |
| <i>Maribacter</i> sp. HTCC2170                | 0    | 0    |
| <i>Mesoflavibacter zeaxanthinifaciens</i> S86 | 0    | 0    |
| <i>Muricauda ruestringensis</i> B1(T)         | 0    | 0    |
| <i>Polaribacter irgensii</i> 23-P(T)          | 0    | 0    |
| <i>Polaribacter</i> sp. Hel1_33_49            | 0    | 0    |
| <i>Polaribacter</i> sp. Hel1_85               | 0    | 0    |
| <i>Polaribacter</i> sp. MED152                | 0    | 0    |
| <i>Psychroflexus gondwanensis</i> ACAM 44(T)  | 0    | 0    |
| <i>Psychroflexus torquis</i> 651(T)           | 0    | 0    |
| <i>Robiginitalea biformata</i> HTCC2501(T)    | 0    | 0    |
| <i>Zobellia galactanivorans</i> Dsij(T)       | 0    | 0    |
| <i>Zunogwangia profunda</i> SM-A87(T)         | 0    | 0    |
