# Supplementary material
Source: PubMed Central journal article supplement (PMC4438327)
Supplement: ismej2014225x6.pdf [file ismej2014225x6.pdf]

**Supplementary Table S4** Selected features of the currently available *Polaribacter* genomes (due to its fragmented status no gene numbers are provided for *P. franzmannii*). Significantly elevated numbers are highlighted.

|                                | <i>P. sp.</i><br>Hel1_33_49 | <i>P. sp.</i><br>Hel1_85 | <i>P. irgensii</i><br>23-P <sup>T</sup> | <i>P. sp.</i><br>MED152 | <i>P. franzmannii</i><br>301 <sup>T</sup> |
|--------------------------------|-----------------------------|--------------------------|-----------------------------------------|-------------------------|-------------------------------------------|
| size (Mbp)                     | 3.01                        | 3.91                     | 2.76                                    | 2.96                    | 6.91                                      |
| contigs / scaffolds            | 2 / 2                       | 4 / 4                    | 7 / 2                                   | 1 / 1                   | 69 / 56                                   |
| G+C [%]                        | 30.4                        | 29.2                     | 34.5                                    | 30.6                    | 32.5                                      |
| protein-coding genes           | 2,620                       | 3,433                    | 2,557                                   | 2,635                   | -                                         |
| rRNA operons                   | 3                           | 4                        | 3                                       | 2                       | -                                         |
| ABC transporter genes          | 30**                        | 39**                     | 24**                                    | 24**                    | -                                         |
| TBDR                           | 26* / 16**                  | 40* / 24**               | 23**                                    | 16**                    | -                                         |
| TBDR + SusD-like protein pairs | 5**                         | 11**                     | 8**                                     | 8**                     | -                                         |
| CBMs                           | 18* / 12 <sup>#</sup>       | 23* / 17 <sup>#</sup>    | 6 <sup>#</sup>                          | 10 <sup>#</sup>         | -                                         |
| CEs                            | 6* / 5 <sup>#</sup>         | 13* / 7 <sup>#</sup>     | 7 <sup>#</sup>                          | 6 <sup>#</sup>          | -                                         |
| GHS                            | 56* / 45 <sup>#</sup>       | 60* / 57 <sup>#</sup>    | 17 <sup>#</sup>                         | 31 <sup>#</sup>         | -                                         |
| GTs                            | 43* / 42 <sup>#</sup>       | 49* / 49 <sup>#</sup>    | 24 <sup>#</sup>                         | 36 <sup>#</sup>         | -                                         |
| PLs                            | 0* / 0 <sup>#</sup>         | 16* / 10 <sup>#</sup>    | 0 <sup>#</sup>                          | 8 <sup>#</sup>          | -                                         |
| ΣCAZymes                       | 123* / 104 <sup>#</sup>     | 161* / 140 <sup>#</sup>  | 54 <sup>#</sup>                         | 91 <sup>#</sup>         | -                                         |
| peptidases                     | 168 <sup>##</sup>           | 161 <sup>##</sup>        | 162 <sup>##</sup>                       | 167 <sup>##</sup>       | -                                         |
| sulfatases                     | 12**                        | 33**                     | 2**                                     | 3**                     | -                                         |
| histine kinases                | 24**                        | 37**                     | 17**                                    | 26**                    | -                                         |
| response regulators            | 22**                        | 41**                     | 19**                                    | 30**                    | -                                         |

TBDR = TonB-dependent receptor; CBM = carbohydrate-binding module; CE = carbohydrate esterase; GH = glycoside hydrolase; GT = glycosyltransferase; PL = polysaccharide lyase.\*manual annotations; \*\*annotations based on HMMer 3 hits better than E-10 against the Pfam database (search profiles: ABC\_tran, ABC2\_membrane, HATPase, His\_kinase, Response\_reg, Sulfatase, SusD, SusD-like, TonB\_dep\_Rec) <sup>#</sup>automated annotations based on combined Pfam, CAZy and DBCan searches; <sup>##</sup>predictions based MEROPS database searches.
