# Supplementary material
Source: PubMed Central journal article supplement (PMC4438327)
Supplement: ismej2014225x7.pdf [file ismej2014225x7.pdf]

**Supplementary Table S5** Average nucleotide identity (ANI) and digital DNA-DNA hybridization (dDDH) of *Polaribacter* spp. Hel1\_33\_49 and Hel1\_85 compared to the currently available *Polaribacter* genomes (*P. franzmannii* 301<sup>T</sup> was excluded due to its fragmented status). ANI was calculated using JSpecies (Richter & Rosselló-Móra, 2009) and dDDH was calculated using the Genome-to-Genome Distance Calculator (GGDC, Auch *et al.*, 2010).

|                                    | <i>P. sp.</i> Hel1_33_49 | <i>P. sp.</i> Hel1_85 | <i>P. irgensii</i> 23-P <sup>T</sup> | <i>P. sp.</i> MED152 |
|------------------------------------|--------------------------|-----------------------|--------------------------------------|----------------------|
| ANIb (ANI with blast)              |                          |                       |                                      |                      |
| <i>Polaribacter sp.</i> Hel1_33_49 | –                        | 80.0                  | 69.8                                 | 77.1                 |
| <i>Polaribacter sp.</i> Hel1_85    | 80.1                     | –                     | 69.1                                 | 77.7                 |
| dDDH                               |                          |                       |                                      |                      |
| <i>Polaribacter sp.</i> Hel1_33_49 | –                        | 23.9                  | 15.9                                 | 21.2                 |
| <i>Polaribacter sp.</i> Hel1_85    | 23.9                     | –                     | 15.4                                 | 20.5                 |

Auch AF, von Jan M, Klenk H-P, Göker M. (2010). Digital DNA-DNA hybridization for microbial species delineation by means of genome-to-genome sequence comparison. *Stand Genomic Sci* **2**: 117-134.

Richter M, Rosselló-Móra R. (2009). Shifting the genomic gold standard for the prokaryotic species definition. *Proc Natl Acad Sci USA* **106**: 19126-19131.
