# Supplementary material
Source: PubMed Central journal article supplement (PMC4438327)
Supplement: ismej2014225x8.pdf [file ismej2014225x8.pdf]

**Supplementary Table S6** Results of proteome analyses of *Polaribacter* sp. Hel1\_33\_49 cultures grown on laminarin and chondroitin sulfate vs. D-mannose.

| Locus     | Product<br>(detected CAZymes and sulfatase are in bold typeface) | %NSAF x 1,000 |        |        | Ratio   |         |         |
|-----------|------------------------------------------------------------------|---------------|--------|--------|---------|---------|---------|
|           |                                                                  | Cho           | Man    | Lam    | Cho/Man | Lam/Man | Cho/Lam |
| PHEL49_1  | chromosomal replication initiator protein DnaA                   | 12.31         | 24.07  | 19.45  | 0.51    | 0.81    | 0.63    |
| PHEL49_5  | aminodeoxychorismate lyase                                       |               |        | 6.86   |         |         |         |
| PHEL49_7  | diaminopimelate epimerase                                        | 11.67         |        | 12.30  |         |         | 0.95    |
| PHEL49_8  | HtrA protease/chaperone protein                                  | 19.91         | 67.06  | 50.69  | 0.30    | 0.76    | 0.39    |
| PHEL49_9  | glyceraldehyde-3-phosphate dehydrogenase                         | 79.21         | 14.57  | 10.09  | 5.44    | 0.69    | 7.85    |
| PHEL49_13 | DNA ligase                                                       | 16.25         | 29.42  | 30.91  | 0.55    | 1.05    | 0.53    |
| PHEL49_15 | conserved hypothetical protein                                   | 2.71          | 11.03  | 12.48  | 0.25    | 1.13    | 0.22    |
| PHEL49_25 | MerR HTH family regulatory protein                               | 4.23          |        |        |         |         |         |
| PHEL49_28 | ribose-phosphate pyrophosphokinase                               | 85.63         | 87.61  | 141.60 | 0.98    | 1.62    | 0.60    |
| PHEL49_29 | LSU ribosomal protein L25p                                       | 454.61        | 246.91 | 437.27 | 1.84    | 1.77    | 1.04    |
| PHEL49_34 | peptidase, M23 family                                            | 4.23          |        | 5.57   |         |         | 0.76    |
| PHEL49_35 | nicotinate-nucleotide adenyltransferase                          | 5.89          |        |        |         |         |         |
| PHEL49_36 | guanylate kinase                                                 | 76.94         | 20.06  | 68.89  | 3.84    | 3.43    | 1.12    |
| PHEL49_37 | YicC-like domain-containing protein                              | 88.23         | 50.15  | 175.60 | 1.76    | 3.50    | 0.50    |
| PHEL49_39 | uracil phosphoribosyltransferase                                 | 11.28         |        |        |         |         |         |
| PHEL49_44 | ATP-binding Mrp / Nbp35 family protein                           | 36.33         | 32.29  | 26.09  | 1.13    | 0.81    | 1.39    |
| PHEL49_46 | thioredoxin reductase                                            | 8.68          |        |        |         |         |         |
| PHEL49_47 | homogentisate 1,2-dioxygenase                                    | 28.59         | 4.90   |        | 5.83    |         |         |
| PHEL49_48 | 4-hydroxyphenylpyruvate dioxygenase                              | 23.08         | 25.07  |        | 0.92    |         |         |
| PHEL49_49 | tryptophan 2,3-dioxygenase                                       | 18.81         |        | 7.43   |         |         | 2.53    |
| PHEL49_52 | glucose-6-phosphate isomerase                                    | 50.49         | 162.68 | 87.64  | 0.31    | 0.54    | 0.58    |
| PHEL49_54 | conserved hypothetical protein                                   |               | 29.55  |        |         |         |         |
| PHEL49_57 | 1-acylglycerol-3-phosphate O-acyltransferase                     | 27.70         |        | 20.26  |         |         | 1.37    |
| PHEL49_58 | acyl-ACP desaturase                                              | 26.73         | 69.68  | 37.54  | 0.38    | 0.54    | 0.71    |
| PHEL49_61 | conserved hypothetical protein, PD-(D/E)XK nuclease superfamily  | 1.27          | 2.06   | 3.33   | 0.61    | 1.62    | 0.38    |
| PHEL49_62 | universal stress protein UspA                                    | 51.91         | 62.51  | 104.01 | 0.83    | 1.66    | 0.50    |
| PHEL49_64 | two-component system sensor histidine kinase                     |               |        | 9.91   |         |         |         |
| PHEL49_65 | enoyl-CoA hydratase                                              |               |        | 12.74  |         |         |         |
| PHEL49_68 | transcriptional regulator, AraC family                           |               |        | 27.02  |         |         |         |
| PHEL49_72 | conserved hypothetical protein (DUF1094)                         | 203.12        | 125.03 | 95.10  | 1.62    | 0.76    | 2.14    |
| PHEL49_73 | DnaJ-domain protein DjlA                                         | 29.02         |        | 31.84  |         |         | 0.91    |

|                   |                                                                          |             |             |             |             |             |             |
|-------------------|--------------------------------------------------------------------------|-------------|-------------|-------------|-------------|-------------|-------------|
| PHEL49_74         | isoleucyl-tRNA synthetase                                                | 35.42       | 84.86       | 29.49       | 0.42        | 0.35        | 1.20        |
| PHEL49_75         | DnaK suppressor protein                                                  | 151.04      | 237.61      | 171.45      | 0.64        | 0.72        | 0.88        |
| PHEL49_80         | phosphate:sodium symporter                                               | 24.85       |             | 21.44       |             |             | 1.16        |
| PHEL49_81         | phosphate-selective porin O and P                                        | 50.05       | 38.37       | 56.21       | 1.30        | 1.46        | 0.89        |
| PHEL49_82         | TonB-dependent receptor, plug                                            |             |             | 30.29       |             |             |             |
| PHEL49_83         | conserved hypothetical protein containing pectin lyase domain            |             | 3.24        | 11.80       |             | 3.64        |             |
| PHEL49_87         | peptidase, M16 family                                                    | 100.21      | 89.73       | 128.38      | 1.12        | 1.43        | 0.78        |
| PHEL49_88         | peptidase, M16 family                                                    | 88.02       | 108.11      | 130.16      | 0.81        | 1.20        | 0.68        |
| PHEL49_89         | LSU ribosomal protein L21                                                | 564.23      | 220.64      | 336.80      | 2.56        | 1.53        | 1.68        |
| PHEL49_90         | LSU ribosomal protein L27p                                               | 22.57       |             |             |             |             |             |
| PHEL49_97         | molybdopterin-guanine dinucleotide biosynthesis protein MobA             | 3.47        |             | 4.57        |             |             | 0.76        |
| PHEL49_102        | single-stranded DNA-binding protein                                      | 368.16      | 199.96      | 239.60      | 1.84        | 1.20        | 1.54        |
| PHEL49_104        | histone-like bacterial DNA-binding protein                               | 216.67      | 33.10       |             | 6.55        |             |             |
| PHEL49_106        | ribonuclease G                                                           | 18.68       | 19.02       | 21.52       | 0.98        | 1.13        | 0.87        |
| PHEL49_107        | endonuclease/exonuclease/phosphatase family protein                      |             | 5.38        | 4.35        |             | 0.81        |             |
| PHEL49_110        | glyoxalase/bleomycin resistance protein/dioxygenase                      | 13.54       |             |             |             |             |             |
| PHEL49_111        | cell division protein FtsX                                               | 3.98        |             | 7.87        |             |             | 0.51        |
| PHEL49_116        | large-conductance mechanosensitive channel                               | 112.85      |             |             |             |             |             |
| PHEL49_118        | thymidine kinase                                                         | 14.72       |             |             |             |             |             |
| PHEL49_119        | conserved hypothetical protein                                           | 11.67       | 7.61        |             | 1.53        |             |             |
| PHEL49_122        | conserved hypothetical protein (DUF4252)                                 |             | 42.90       |             |             |             |             |
| PHEL49_123        | arsenate reductase                                                       | 29.02       |             |             |             |             |             |
| PHEL49_125        | cystathionine gamma-lyase                                                | 8.06        | 5.25        | 23.35       | 1.53        | 4.44        | 0.35        |
| PHEL49_126        | conserved hypothetical protein containing bacterial Ig-like domain       | 2.22        | 3.62        | 2.92        | 0.61        | 0.81        | 0.76        |
| PHEL49_129        | glycyl-tRNA synthetase                                                   | 39.02       | 44.88       | 54.40       | 0.87        | 1.21        | 0.72        |
| PHEL49_130        | elongation factor Ts                                                     | 232.14      | 305.75      | 303.12      | 0.76        | 0.99        | 0.77        |
| PHEL49_131        | SSU ribosomal protein S2p (SAe)                                          | 336.36      | 298.93      | 411.25      | 1.13        | 1.38        | 0.82        |
| PHEL49_132        | SSU ribosomal protein S9p (S16e)                                         | 1002.08     | 455.99      | 433.88      | 2.20        | 0.95        | 2.31        |
| PHEL49_133        | LSU ribosomal protein L13p (L13Ae)                                       | 370.40      | 253.09      | 388.08      | 1.46        | 1.53        | 0.95        |
| <b>PHEL49_134</b> | <b>conserved hypothetical protein (DUF1083), N-terminal CBMnc domain</b> | <b>1.34</b> | <b>8.74</b> | <b>2.65</b> | <b>0.15</b> | <b>0.30</b> | <b>0.51</b> |
| PHEL49_136        | glutaminyl-tRNA synthetase                                               | 58.33       | 52.61       | 82.29       | 1.11        | 1.56        | 0.71        |
| PHEL49_139        | dihydroneopterin aldolase                                                | 24.18       | 126.08      | 50.94       | 0.19        | 0.40        | 0.47        |
| PHEL49_142        | conserved hypothetical protein                                           | 20.69       | 19.92       | 34.67       | 1.04        | 1.74        | 0.60        |
| PHEL49_149        | metallo-beta-lactamase superfamily protein                               | 19.04       | 55.16       | 25.07       | 0.35        | 0.45        | 0.76        |
| PHEL49_150        | peptidase, S8/S53 family                                                 | 15.87       | 62.06       | 26.47       | 0.26        | 0.43        | 0.60        |
| PHEL49_151        | Zn-dependent aminopeptidase, M1 family                                   | 26.70       | 174.03      | 62.78       | 0.15        | 0.36        | 0.43        |
| PHEL49_155        | flavodoxin reductases (ferredoxin-NADPH reductases)                      | 13.89       | 16.97       | 9.14        | 0.82        | 0.54        | 1.52        |
| PHEL49_156        | aspartate-semialdehyde dehydrogenase                                     |             | 6.13        | 17.34       |             | 2.83        |             |
| PHEL49_160        | formate acetyltransferase                                                |             |             | 2.12        |             |             |             |

|                   |                                                                          |             |             |             |             |             |             |
|-------------------|--------------------------------------------------------------------------|-------------|-------------|-------------|-------------|-------------|-------------|
| PHEL49_162        | PSP1 domain-containing protein                                           | 18.23       | 27.58       | 25.72       | 0.66        | 0.93        | 0.71        |
| <b>PHEL49_164</b> | <b>penicillin-binding protein 1A, GT51 family</b>                        | <b>5.58</b> | <b>3.89</b> | <b>2.10</b> | <b>1.43</b> | <b>0.54</b> | <b>2.66</b> |
| PHEL49_165        | succinyl-CoA:3-ketoacid-coenzyme A transferase subunit A                 | 52.08       | 21.22       | 27.43       | 2.45        | 1.29        | 1.90        |
| PHEL49_170        | conserved hypothetical protein                                           | 9.15        | 5.96        | 9.64        | 1.53        | 1.62        | 0.95        |
| PHEL49_172        | tryptophanyl-tRNA synthetase                                             | 54.54       | 55.16       | 61.91       | 0.99        | 1.12        | 0.88        |
| PHEL49_177        | immunoreactive 84kD antigen PG93                                         | 1.57        |             | 3.11        |             |             | 0.51        |
| PHEL49_179        | TonB-dependent receptor, plug                                            |             | 2.37        | 6.71        |             | 2.83        |             |
| PHEL49_182        | acyl-CoA thioesterase II                                                 | 6.16        |             |             |             |             |             |
| PHEL49_184        | membrane fusion protein of RND family multidrug efflux pump              | 11.56       | 78.03       | 58.71       | 0.15        | 0.75        | 0.20        |
| PHEL49_185        | acriflavin resistance protein                                            | 28.69       | 104.71      | 21.91       | 0.27        | 0.21        | 1.31        |
| PHEL49_186        | outer membrane efflux protein                                            | 21.67       | 26.48       | 37.44       | 0.82        | 1.41        | 0.58        |
| PHEL49_193        | hypothetical protein                                                     | 49.48       |             |             |             |             |             |
| PHEL49_201        | conserved hypothetical protein                                           |             |             | 1.37        |             |             |             |
| PHEL49_202        | lysophospholipase L1-like esterases                                      |             | 8.49        |             |             |             |             |
| PHEL49_203        | acyl-CoA dehydrogenase                                                   | 227.75      | 132.89      | 91.18       | 1.71        | 0.69        | 2.50        |
| PHEL49_206        | conserved hypothetical protein                                           | 10.75       | 15.76       | 22.64       | 0.68        | 1.44        | 0.47        |
| PHEL49_207        | conserved hypothetical protein                                           | 60.94       | 85.50       | 78.01       | 0.71        | 0.91        | 0.78        |
| PHEL49_208        | dTDP-4-dehydrorhamnose 3,5-epimerase                                     | 9.15        | 29.82       | 24.10       | 0.31        | 0.81        | 0.38        |
| PHEL49_209        | CDP-glycerol:poly(glycerophosphate) glycerophosphotransferase            | 3.47        | 5.66        | 9.14        | 0.61        | 1.62        | 0.38        |
| PHEL49_214        | bacterial transferase hexapeptide repeat protein                         | 19.35       |             | 29.72       |             |             | 0.65        |
| <b>PHEL49_217</b> | <b>glycosyltransferase, GT2 family</b>                                   |             |             | <b>5.94</b> |             |             |             |
| PHEL49_218        | phosphoribosylamine-glycine ligase                                       | 11.78       |             | 7.75        |             |             | 1.52        |
| PHEL49_220        | two-component system response regulator                                  | 88.54       | 93.35       | 68.58       | 0.95        | 0.73        | 1.29        |
| PHEL49_223        | ABC transporter, ATP-binding protein                                     | 6.68        | 3.11        | 11.30       | 2.15        | 3.64        | 0.59        |
| PHEL49_224        | glucose-1-phosphate thymidyltransferase                                  | 21.96       | 11.93       | 26.50       | 1.84        | 2.22        | 0.83        |
| PHEL49_229        | small-conductance mechanosensitive channel                               | 24.95       | 40.64       | 70.38       | 0.61        | 1.73        | 0.35        |
| PHEL49_230        | acyl-CoA thioester hydrolase                                             | 64.14       | 29.03       | 70.38       | 2.21        | 2.42        | 0.91        |
| PHEL49_233        | conserved hypothetical protein                                           |             |             | 4.25        |             |             |             |
| PHEL49_235        | transcription-repair coupling factor                                     | 1.07        | 8.69        | 2.81        | 0.12        | 0.32        | 0.38        |
| PHEL49_242        | ATP-dependent helicase                                                   | 6.21        | 1.84        | 4.46        | 3.38        | 2.42        | 1.39        |
| PHEL49_243        | 2-amino-3-ketobutyrate coenzyme A ligase                                 | 35.39       | 25.07       | 12.16       | 1.41        | 0.48        | 2.91        |
| PHEL49_244        | OmpA family protein                                                      | 607.96      | 659.62      | 687.22      | 0.92        | 1.04        | 0.88        |
| PHEL49_245        | ATP synthase beta chain                                                  | 358.60      | 580.20      | 487.04      | 0.62        | 0.84        | 0.74        |
| PHEL49_247        | ribosome-binding factor A                                                | 36.11       |             |             |             |             |             |
| PHEL49_251        | peptidase, M28 family                                                    | 4.51        |             | 7.92        |             |             | 0.57        |
| PHEL49_252        | WD40-like beta propeller                                                 | 25.39       | 63.43       | 53.49       | 0.40        | 0.84        | 0.47        |
| PHEL49_253        | conserved hypothetical protein containing EF-hand calcium-binding domain | 47.40       |             |             |             |             |             |
| PHEL49_254        | GTP-binding protein LepA                                                 | 8.08        | 18.11       | 25.28       | 0.45        | 1.40        | 0.32        |
| PHEL49_255        | peptidase membrane zinc metallopeptidase                                 | 27.08       | 180.93      | 71.32       | 0.15        | 0.39        | 0.38        |

|            |                                                                                     |        |         |         |      |      |      |
|------------|-------------------------------------------------------------------------------------|--------|---------|---------|------|------|------|
| PHEL49_257 | MotA/TolQ/ExbB proton channel family protein                                        | 976.56 | 865.59  | 1237.85 | 1.13 | 1.43 | 0.79 |
| PHEL49_259 | biopolymer transport ExbD/TolR protein                                              | 244.34 | 220.64  | 337.23  | 1.11 | 1.53 | 0.72 |
| PHEL49_260 | biopolymer transport ExbD/TolR protein                                              | 382.35 | 155.75  | 346.12  | 2.45 | 2.22 | 1.10 |
| PHEL49_261 | conserved hypothetical protein containing outer membrane protein beta-barrel domain |        |         | 13.21   |      |      |      |
| PHEL49_263 | RNA polymerase sigma-54 factor RpoN                                                 | 7.25   | 27.58   | 9.55    | 0.26 | 0.35 | 0.76 |
| PHEL49_264 | asparaginyl-tRNA synthetase                                                         | 73.86  | 110.32  | 89.15   | 0.67 | 0.81 | 0.83 |
| PHEL49_266 | inner membrane transporter                                                          | 3.01   |         | 5.94    |      |      | 0.51 |
| PHEL49_267 | ribosome recycling factor                                                           | 98.18  | 33.10   | 102.53  | 2.97 | 3.10 | 0.96 |
| PHEL49_268 | uridylate kinase                                                                    | 85.94  | 131.54  | 120.01  | 0.65 | 0.91 | 0.72 |
| PHEL49_269 | FKBP-type peptidyl-prolyl cis-transisomerase (trigger factor)                       | 136.74 | 175.21  | 164.32  | 0.78 | 0.94 | 0.83 |
| PHEL49_270 | ATP-dependent Clp protease proteolytic subunit                                      | 781.46 | 1264.09 | 1682.76 | 0.62 | 1.33 | 0.46 |
| PHEL49_271 | ATP-dependent Clp protease ATP-binding subunit ClpX                                 | 25.58  | 34.32   | 21.79   | 0.75 | 0.63 | 1.17 |
| PHEL49_272 | DNA primase                                                                         | 1.76   |         | 2.32    |      |      | 0.76 |
| PHEL49_274 | NAD synthetase                                                                      | 81.72  | 45.65   | 73.78   | 1.79 | 1.62 | 1.11 |
| PHEL49_275 | gliding motility protein GldB                                                       |        |         | 16.42   |      |      |      |
| PHEL49_278 | polyribonucleotide nucleotidyltransferase                                           | 114.21 | 164.82  | 163.27  | 0.69 | 0.99 | 0.70 |
| PHEL49_279 | SSU ribosomal protein S15p (S13e)                                                   | 135.42 |         |         |      |      |      |
| PHEL49_280 | acetyl-coenzyme A carboxyl transferase beta chain                                   | 80.40  | 34.48   | 136.52  | 2.33 | 3.96 | 0.59 |
| PHEL49_281 | fructose-bisphosphate aldolase class II                                             | 60.76  | 189.52  | 283.46  | 0.32 | 1.50 | 0.21 |
| PHEL49_282 | surface antigen (D15)                                                               | 4.84   | 2.25    | 5.46    | 2.15 | 2.42 | 0.89 |
| PHEL49_283 | RNA methyltransferase, TrmH family                                                  | 17.55  |         |         |      |      |      |
| PHEL49_286 | NifU-like protein                                                                   | 3.98   | 9.73    | 31.47   | 0.41 | 3.23 | 0.13 |
| PHEL49_287 | outer membrane protein transport protein (OMPP1/FadL/TodX)                          |        | 4.41    | 39.23   |      | 8.89 |      |
| PHEL49_290 | prolyl-tRNA synthetase                                                              | 56.83  | 55.16   | 68.46   | 1.03 | 1.24 | 0.83 |
| PHEL49_292 | SSU ribosomal protein S20p                                                          | 52.66  |         | 59.44   |      |      | 0.89 |
| PHEL49_297 | rod shape-determining protein MreB                                                  | 71.37  | 71.56   | 57.83   | 1.00 | 0.81 | 1.23 |
| PHEL49_298 | IMP cyclohydrolase / phosphoribosylaminoimidazolecarboxamide formyltransferase      | 42.32  | 68.95   | 105.07  | 0.61 | 1.52 | 0.40 |
| PHEL49_304 | heat shock protein 60 family chaperone GroEL                                        | 182.11 | 2957.73 | 787.00  | 0.06 | 0.27 | 0.23 |
| PHEL49_305 | heat shock protein 60 family co-chaperone GroES                                     | 27.08  | 330.96  | 80.24   | 0.08 | 0.24 | 0.34 |
| PHEL49_307 | conserved hypothetical protein                                                      | 9.34   | 22.82   | 12.30   | 0.41 | 0.54 | 0.76 |
| PHEL49_308 | conserved hypothetical protein containing lipopolysaccharide-assembly domain        | 64.14  | 203.22  | 79.77   | 0.32 | 0.39 | 0.80 |
| PHEL49_309 | transcriptional regulator, Fis family                                               | 8.64   | 42.25   | 7.59    | 0.20 | 0.18 | 1.14 |
| PHEL49_310 | tRNA-i(6)A37 methylthiotransferase                                                  |        |         | 8.10    |      |      |      |
| PHEL49_311 | DNA topoisomerase I                                                                 | 54.02  | 194.82  | 103.38  | 0.28 | 0.53 | 0.52 |
| PHEL49_312 | arginase                                                                            |        | 10.03   | 10.13   |      | 1.01 |      |
| PHEL49_313 | gliding motility protein GldK                                                       | 55.99  | 44.55   | 53.15   | 1.26 | 1.19 | 1.05 |
| PHEL49_314 | gliding motility protein GldL                                                       | 494.56 | 426.89  | 717.10  | 1.16 | 1.68 | 0.69 |

|                   |                                                                                  |             |        |             |      |      |             |
|-------------------|----------------------------------------------------------------------------------|-------------|--------|-------------|------|------|-------------|
| PHEL49_315        | gliding motility protein GldM                                                    | 120.91      | 128.05 | 170.35      | 0.94 | 1.33 | 0.71        |
| PHEL49_316        | gliding motility protein GldN                                                    | 110.79      | 190.55 | 113.47      | 0.58 | 0.60 | 0.98        |
| PHEL49_319        | ABC transporter, ATP-binding protein                                             |             |        | 3.77        |      |      |             |
| PHEL49_322        | hexapeptide transferase family protein                                           |             |        | 9.91        |      |      |             |
| PHEL49_325        | endonuclease/exonuclease/phosphatase family protein                              | 14.25       | 29.03  | 39.88       | 0.49 | 1.37 | 0.36        |
| PHEL49_327        | amidohydrolase 3 family protein                                                  | 5.55        | 3.62   | 8.77        | 1.53 | 2.42 | 0.63        |
| PHEL49_329        | S-adenosylmethionine synthetase                                                  | 8.83        | 4.80   | 25.20       | 1.84 | 5.25 | 0.35        |
| PHEL49_330        | O-acetylhomoserine sulfhydrylase / O-succinylhomoserine sulfhydrylase            |             | 71.10  | 332.84      |      | 4.68 |             |
| PHEL49_331        | aspartokinase / homoserine dehydrogenase                                         |             | 3.50   | 12.03       |      | 3.43 |             |
| PHEL49_332        | O-acetylhomoserine sulfhydrylase / O-succinylhomoserine sulfhydrylase            |             |        | 36.47       |      |      |             |
| PHEL49_333        | Rrf2 family transcriptional regulator                                            | 8.46        |        |             |      |      |             |
| PHEL49_336        | phosphoadenylyl-sulfate reductase [thioredoxin]                                  | 47.96       | 179.27 | 386.33      | 0.27 | 2.16 | 0.12        |
| PHEL49_337        | sulfate adenylyltransferase subunit 2                                            |             | 12.61  | 76.42       |      | 6.06 |             |
| PHEL49_338        | sulfate adenylyltransferase subunit 1                                            | 5.89        | 69.55  | 122.10      | 0.08 | 1.76 | 0.05        |
| PHEL49_339        | nitrite/sulfite reductase                                                        |             | 14.14  | 46.86       |      | 3.31 |             |
| PHEL49_341        | precorrin-2 dehydrogenase                                                        |             |        | 36.47       |      |      |             |
| PHEL49_342        | pyridine nucleotide-disulphide oxidoreductase                                    | 42.76       | 75.48  | 150.15      | 0.57 | 1.99 | 0.28        |
| PHEL49_344        | serine O-acetyltransferase                                                       |             |        | 25.47       |      |      |             |
| PHEL49_345        | cysteine synthase                                                                | 42.32       | 72.40  | 105.87      | 0.58 | 1.46 | 0.40        |
| PHEL49_346        | homocysteine S-methyltransferase                                                 | 3.66        |        |             |      |      |             |
| PHEL49_347        | methionine synthase                                                              |             | 2.23   | 5.40        |      | 2.42 |             |
| PHEL49_348        | 5,10-methylenetetrahydrofolate reductase                                         |             |        | 24.76       |      |      |             |
| PHEL49_349        | thioredoxin                                                                      | 258.52      |        |             |      |      |             |
| <b>PHEL49_359</b> | <b>glycoside hydrolase, CBM48 domain, GH13 family</b>                            | <b>1.93</b> |        |             |      |      |             |
| PHEL49_360        | SusE outer membrane protein                                                      | 2.26        |        |             |      |      |             |
| PHEL49_362        | RagB/SusD domain-containing protein                                              | 11.67       | 5.71   | 9.22        | 2.05 | 1.62 | 1.27        |
| PHEL49_363        | TonB-dependent receptor, plug                                                    | 22.78       | 28.87  | 24.16       | 0.79 | 0.84 | 0.94        |
| PHEL49_364        | transcriptional regulator, LacI family                                           | 12.47       |        |             |      |      |             |
| <b>PHEL49_367</b> | <b>maltose phosphorylase, GH65 family</b>                                        | <b>1.52</b> |        | <b>2.00</b> |      |      | <b>0.76</b> |
| PHEL49_376        | prephenate dehydratase                                                           |             |        | 5.75        |      |      |             |
| PHEL49_377        | aminotransferase                                                                 | 14.17       | 12.83  | 4.15        | 1.10 | 0.32 | 3.42        |
| PHEL49_378        | prephenate dehydrogenase                                                         | 6.55        | 7.12   | 14.38       | 0.92 | 2.02 | 0.46        |
| PHEL49_379        | 3-deoxy-D-arabino-heptulosonate 7-phosphate synthetase/chorismate mutase type II | 13.21       | 32.29  | 84.80       | 0.41 | 2.63 | 0.16        |
| PHEL49_380        | ribosome-associated GTPase                                                       | 14.64       | 17.89  | 7.23        | 0.82 | 0.40 | 2.03        |
| PHEL49_382        | Ycel-like domain protein                                                         | 327.26      | 712.49 | 586.92      | 0.46 | 0.82 | 0.56        |
| PHEL49_384        | Cys/Met metabolism PLP-dependent enzyme                                          | 67.71       |        |             |      |      |             |
| PHEL49_386        | Na <sup>+</sup> /H <sup>+</sup> antiporter NhaC type                             | 3.91        |        |             |      |      |             |
| PHEL49_388        | conserved hypothetical protein (DUF4289)                                         | 5.35        | 11.61  | 11.73       | 0.46 | 1.01 | 0.46        |
| PHEL49_390        | 37-kD nucleoid-associated bacterial protein                                      | 9.91        | 13.45  | 50.01       | 0.74 | 3.72 | 0.20        |
| PHEL49_391        | lipoate-protein ligase B                                                         | 12.54       | 12.26  | 29.72       | 1.02 | 2.42 | 0.42        |
| PHEL49_392        | metallo-peptidase, M12B family, reprotolysin-like                                | 7.91        | 12.88  | 3.90        | 0.61 | 0.30 | 2.03        |

|            |                                                                |         |         |         |      |      |      |
|------------|----------------------------------------------------------------|---------|---------|---------|------|------|------|
| PHEL49_393 | conserved hypothetical protein                                 | 13.54   | 13.24   |         | 1.02 |      |      |
| PHEL49_395 | peptidase, S41 family                                          | 15.36   | 12.05   | 3.00    | 1.27 | 0.25 | 5.13 |
| PHEL49_396 | delta-1-pyrroline-5-carboxylate dehydrogenase                  | 220.34  | 321.61  | 282.57  | 0.69 | 0.88 | 0.78 |
| PHEL49_397 | conserved hypothetical protein (DUF833)                        | 5.02    |         |         |      |      |      |
| PHEL49_401 | Na(+)-translocating NADH-quinone reductase subunit A           | 20.73   | 24.77   | 40.03   | 0.84 | 1.62 | 0.52 |
| PHEL49_403 | Na(+)-translocating NADH-quinone reductase subunit C           | 17.55   |         | 62.74   |      |      | 0.28 |
| PHEL49_406 | Na(+)-translocating NADH-quinone reductase subunit F           | 22.57   | 34.48   | 44.58   | 0.65 | 1.29 | 0.51 |
| PHEL49_408 | YqeY family protein                                            | 46.55   |         |         |      |      |      |
| PHEL49_411 | flavin containing amine oxidoreductase                         | 9.87    | 11.49   | 18.57   | 0.86 | 1.62 | 0.53 |
| PHEL49_414 | RNA polymerase sigma-70 factor, RpoD                           | 192.87  | 96.95   | 110.77  | 1.99 | 1.14 | 1.74 |
| PHEL49_417 | deoxyadenosine kinase                                          | 101.56  | 73.55   | 118.87  | 1.38 | 1.62 | 0.85 |
| PHEL49_419 | two-component system sensor histidine kinase                   |         |         | 2.97    |      |      |      |
| PHEL49_422 | conserved hypothetical protein                                 | 61.36   | 244.77  | 153.23  | 0.25 | 0.63 | 0.40 |
| PHEL49_423 | conserved hypothetical protein (DUF4480)                       | 32.21   | 175.66  | 82.23   | 0.18 | 0.47 | 0.39 |
| PHEL49_425 | gliding motility protein GldA                                  | 9.96    | 9.73    | 44.58   | 1.02 | 4.58 | 0.22 |
| PHEL49_427 | oxidoreductase, FAD-binding protein                            | 2.71    | 4.41    | 24.96   | 0.61 | 5.66 | 0.11 |
| PHEL49_428 | DNA polymerase III subunit alpha                               | 11.97   | 2.02    | 1.63    | 5.93 | 0.81 | 7.34 |
| PHEL49_429 | SSU ribosomal protein S16p                                     | 445.45  | 267.09  | 347.23  | 1.67 | 1.30 | 1.28 |
| PHEL49_434 | saccharopine dehydrogenase                                     | 106.77  | 53.04   | 37.72   | 2.01 | 0.71 | 2.83 |
| PHEL49_436 | phosphoenolpyruvate carboxykinase (ATP)                        | 60.94   | 18.39   | 8.92    | 3.31 | 0.48 | 6.84 |
| PHEL49_437 | amidohydrolase, M20 family                                     | 20.17   | 14.08   | 3.79    | 1.43 | 0.27 | 5.32 |
| PHEL49_443 | isochorismatase hydrolase                                      | 143.54  | 22.06   | 64.19   | 6.51 | 2.91 | 2.24 |
| PHEL49_445 | pyrophosphate-energized proton pump                            | 43.81   | 29.85   | 13.64   | 1.47 | 0.46 | 3.21 |
| PHEL49_446 | inorganic pyrophosphatase                                      |         | 31.52   | 114.63  |      | 3.64 |      |
| PHEL49_447 | pyruvate dehydrogenase E1 component beta subunit               | 133.54  | 202.25  | 260.03  | 0.66 | 1.29 | 0.51 |
| PHEL49_448 | electron transfer flavoprotein subunit beta                    | 1120.94 | 902.99  | 1254.74 | 1.24 | 1.39 | 0.89 |
| PHEL49_449 | electron transfer flavoprotein subunit alpha                   | 1323.38 | 1450.88 | 1156.28 | 0.91 | 0.80 | 1.14 |
| PHEL49_450 | conserved hypothetical protein (DUF151)                        | 47.10   | 19.19   | 50.39   | 2.45 | 2.63 | 0.93 |
| PHEL49_451 | Na+ dependent nucleoside transporter domain-containing protein | 27.64   | 4.50    | 20.01   | 6.14 | 4.44 | 1.38 |
| PHEL49_452 | thymidylate synthase                                           | 31.74   | 24.13   | 27.86   | 1.32 | 1.15 | 1.14 |
| PHEL49_456 | Xaa-Pro aminopeptidase, M24 family                             | 18.23   | 4.24    | 22.29   | 4.30 | 5.25 | 0.82 |
| PHEL49_459 | dipeptidyl-peptidase III                                       | 88.81   | 73.07   | 94.94   | 1.22 | 1.30 | 0.94 |
| PHEL49_463 | NTP pyrophosphohydrolase-like domain                           | 36.11   |         |         |      |      |      |
| PHEL49_464 | carbohydrate kinase                                            | 3.69    |         | 6.48    |      |      | 0.57 |
| PHEL49_468 | helix-turn-helix domain protein                                | 10.26   |         | 10.81   |      |      | 0.95 |
| PHEL49_472 | lysine dehydrogenase                                           | 19.56   |         | 17.83   |      |      | 1.10 |
| PHEL49_475 | 2-dehydro-3-deoxyphosphooctonate aldolase                      | 15.80   | 18.39   | 53.49   | 0.86 | 2.91 | 0.30 |
| PHEL49_476 | peptidase, M28 family                                          | 21.96   | 17.89   | 24.10   | 1.23 | 1.35 | 0.91 |
| PHEL49_478 | alpha-2-macroglobulin domain protein                           | 2.29    |         |         |      |      |      |
| PHEL49_479 | UDP-N-acetylmuramate-L-alanine ligase                          | 13.28   | 10.82   | 19.23   | 1.23 | 1.78 | 0.69 |
| PHEL49_481 | conserved hypothetical protein                                 | 9.23    | 5.01    | 4.05    | 1.84 | 0.81 | 2.28 |
| PHEL49_485 | potassium uptake protein TrkA                                  | 12.19   |         | 8.92    |      |      | 1.37 |

|                   |                                                    |              |              |             |             |             |              |
|-------------------|----------------------------------------------------|--------------|--------------|-------------|-------------|-------------|--------------|
| PHEL49_488        | acyl-CoA N-acyltransferase family protein          |              |              | 4.95        |             |             |              |
| <b>PHEL49_490</b> | <b>glycosyltransferase, GT4 family</b>             | <b>4.72</b>  |              |             |             |             |              |
| PHEL49_494        | conserved hypothetical protein                     | 13.10        |              |             |             |             |              |
| PHEL49_497        | 23S rRNA (guanosine-2'-O-)-methyltransferase RlmB  | 92.79        | 61.29        | 92.45       | 1.51        | 1.51        | 1.00         |
| <b>PHEL49_498</b> | <b>arylsulfate sulfotransferase</b>                | <b>37.24</b> | <b>20.23</b> | <b>2.97</b> | <b>1.84</b> | <b>0.15</b> | <b>12.53</b> |
| PHEL49_499        | ASPIC/UnbV-like protein / integrin-like protein    | 5.50         |              |             |             |             |              |
| PHEL49_500        | conserved hypothetical protein                     | 607.26       | 131.01       | 158.80      | 4.64        | 1.21        | 3.82         |
| PHEL49_501        | RagB/SusD domain-containing protein                | 1232.29      | 347.93       | 526.69      | 3.54        | 1.51        | 2.34         |
| PHEL49_502        | TonB-dependent receptor, plug                      | 1829.85      | 662.87       | 824.47      | 2.76        | 1.24        | 2.22         |
| PHEL49_504        | SSU ribosomal protein S12p (S23e)                  | 24.18        |              |             |             |             |              |
| PHEL49_505        | SSU ribosomal protein S7p (S5e)                    | 304.69       | 269.67       | 341.75      | 1.13        | 1.27        | 0.89         |
| PHEL49_506        | elongation factor EF-G                             | 253.47       | 217.81       | 174.88      | 1.16        | 0.80        | 1.45         |
| PHEL49_507        | SSU ribosomal protein S10p (S20e)                  | 381.63       | 130.38       | 113.47      | 2.93        | 0.87        | 3.36         |
| PHEL49_509        | LSU ribosomal protein L3p (L3e)                    | 470.88       | 446.30       | 628.12      | 1.06        | 1.41        | 0.75         |
| PHEL49_510        | LSU ribosomal protein L4p (L1e)                    | 253.17       | 278.20       | 348.86      | 0.91        | 1.25        | 0.73         |
| PHEL49_511        | LSU ribosomal protein L23p (L23Ae)                 | 147.73       | 260.76       | 243.14      | 0.57        | 0.93        | 0.61         |
| PHEL49_512        | LSU ribosomal protein L2p (L8e)                    | 117.36       | 80.90        | 109.96      | 1.45        | 1.36        | 1.07         |
| PHEL49_513        | SSU ribosomal protein S19p (S15e)                  | 270.83       | 176.51       | 178.31      | 1.53        | 1.01        | 1.52         |
| PHEL49_514        | LSU ribosomal protein L22p (L17e)                  | 356.60       | 88.26        | 219.91      | 4.04        | 2.49        | 1.62         |
| PHEL49_515        | SSU ribosomal protein S3p (S3e)                    | 280.86       | 73.55        | 323.59      | 3.82        | 4.40        | 0.87         |
| PHEL49_516        | LSU ribosomal protein L16p (L10e)                  | 215.82       | 186.17       | 356.61      | 1.16        | 1.92        | 0.61         |
| PHEL49_518        | SSU ribosomal protein S17p (S11e)                  | 13.54        |              | 17.83       |             |             | 0.76         |
| PHEL49_520        | LSU ribosomal protein L24p (L26e)                  | 153.88       |              |             |             |             |              |
| PHEL49_521        | LSU ribosomal protein L5p (L11e)                   | 660.15       | 347.51       | 570.58      | 1.90        | 1.64        | 1.16         |
| PHEL49_522        | SSU ribosomal protein S14p (S29e)                  | 74.48        | 33.10        | 80.24       | 2.25        | 2.42        | 0.93         |
| PHEL49_523        | SSU ribosomal protein S8p (S15Ae)                  | 257.29       | 169.16       | 101.04      | 1.52        | 0.60        | 2.55         |
| PHEL49_524        | LSU ribosomal protein L6p (L9e)                    | 270.83       | 347.51       | 307.58      | 0.78        | 0.89        | 0.88         |
| PHEL49_525        | LSU ribosomal protein L18p (L5e)                   | 67.71        |              |             |             |             |              |
| PHEL49_526        | SSU ribosomal protein S5p (S2e)                    | 447.63       | 153.22       | 326.89      | 2.92        | 2.13        | 1.37         |
| PHEL49_527        | LSU ribosomal protein L30p (L7e)                   | 29.02        |              |             |             |             |              |
| PHEL49_528        | LSU ribosomal protein L15p (L27Ae)                 | 359.70       | 131.01       | 228.45      | 2.75        | 1.74        | 1.57         |
| PHEL49_529        | preprotein translocase subunit SecY (TC 3.A.5.1.1) | 38.09        | 45.97        | 16.72       | 0.83        | 0.36        | 2.28         |
| PHEL49_530        | translation initiation factor IF-1                 | 67.71        |              |             |             |             |              |
| PHEL49_532        | SSU ribosomal protein S13p (S18e)                  | 270.83       | 133.96       | 235.62      | 2.02        | 1.76        | 1.15         |
| PHEL49_533        | SSU ribosomal protein S11p (S14e)                  | 67.71        |              | 70.05       |             |             | 0.97         |
| PHEL49_534        | SSU ribosomal protein S4p (S9e)                    | 403.30       | 153.49       | 395.37      | 2.63        | 2.58        | 1.02         |
| PHEL49_535        | DNA-directed RNA polymerase alpha subunit          | 728.32       | 1753.20      | 534.92      | 0.42        | 0.31        | 1.36         |
| PHEL49_536        | LSU ribosomal protein L17p                         | 650.75       | 281.93       | 624.07      | 2.31        | 2.21        | 1.04         |
| PHEL49_539        | conserved hypothetical protein                     | 4.84         |              |             |             |             |              |
| PHEL49_540        | carbamoyl-phosphate synthase small chain           | 64.41        | 37.67        | 65.23       | 1.71        | 1.73        | 0.99         |
| PHEL49_542        | enolase                                            | 222.26       | 942.52       | 1430.32     | 0.24        | 1.52        | 0.16         |
| PHEL49_543        | citrate synthase (si)                              | 189.02       | 64.35        | 44.58       | 2.94        | 0.69        | 4.24         |

|            |                                                                                             |        |         |        |      |      |       |
|------------|---------------------------------------------------------------------------------------------|--------|---------|--------|------|------|-------|
| PHEL49_546 | amidinotransferase                                                                          | 56.42  | 6.13    | 4.95   | 9.21 | 0.81 | 11.39 |
| PHEL49_548 | type I phosphodiesterase/nucleotide pyrophosphatase precursor                               | 2.22   | 16.28   | 19.00  | 0.14 | 1.17 | 0.12  |
| PHEL49_550 | methionine ABC transporter ATP-binding protein                                              | 30.35  | 34.24   | 73.78  | 0.89 | 2.16 | 0.41  |
| PHEL49_552 | complex I intermediate-associated protein 30 (CIA30)                                        |        |         | 32.85  |      |      |       |
| PHEL49_553 | conserved hypothetical membrane protein (DUF389)                                            |        | 14.30   |        |      |      |       |
| PHEL49_555 | short chain dehydrogenase/reductase                                                         | 51.46  | 13.24   | 39.23  | 3.89 | 2.96 | 1.31  |
| PHEL49_556 | amidohydrolase 1 family protein                                                             | 97.15  | 47.97   | 31.01  | 2.03 | 0.65 | 3.13  |
| PHEL49_557 | conserved hypothetical protein                                                              |        | 12.03   | 17.83  |      | 1.48 |       |
| PHEL49_558 | glutamine cyclotransferase                                                                  | 27.78  | 82.03   | 70.87  | 0.34 | 0.86 | 0.39  |
| PHEL49_559 | LSU ribosomal protein L31p                                                                  | 128.65 | 77.22   | 240.71 | 1.67 | 3.12 | 0.53  |
| PHEL49_560 | glycine dehydrogenase                                                                       | 116.54 | 171.85  | 74.58  | 0.68 | 0.43 | 1.56  |
| PHEL49_562 | D-3-phosphoglycerate dehydrogenase                                                          | 17.41  | 70.92   | 136.28 | 0.25 | 1.92 | 0.13  |
| PHEL49_563 | NlpC/P60 family protein                                                                     | 9.03   |         | 9.91   |      |      | 0.91  |
| PHEL49_565 | kynurenine 3-monooxygenase                                                                  |        |         | 3.18   |      |      |       |
| PHEL49_566 | endoribonuclease L-PSP                                                                      | 22.57  |         |        |      |      |       |
| PHEL49_567 | peptidase, M20 family                                                                       | 15.44  |         |        |      |      |       |
| PHEL49_568 | aldehyde dehydrogenase family protein                                                       | 2.56   |         |        |      |      |       |
| PHEL49_569 | short chain dehydrogenase/reductase                                                         | 36.27  | 11.82   | 15.92  | 3.07 | 1.35 | 2.28  |
| PHEL49_576 | chaperone protein DnaK                                                                      | 210.09 | 1289.78 | 382.83 | 0.16 | 0.30 | 0.55  |
| PHEL49_577 | conserved hypothetical protein (DUF2853)                                                    | 713.54 | 517.66  | 747.51 | 1.38 | 1.44 | 0.95  |
| PHEL49_579 | proteorhodopsin                                                                             | 185.57 |         |        |      |      |       |
| PHEL49_581 | conserved hypothetical protein (DUF328)                                                     | 14.01  | 15.22   | 76.86  | 0.92 | 5.05 | 0.18  |
| PHEL49_584 | conserved hypothetical protein                                                              | 8.21   | 170.50  | 72.94  | 0.05 | 0.43 | 0.11  |
| PHEL49_589 | ribosomal large subunit pseudouridine synthase D                                            | 8.68   | 8.49    |        | 1.02 |      |       |
| PHEL49_590 | conserved hypothetical protein containing PASTA domain                                      | 45.14  | 52.53   | 114.63 | 0.86 | 2.18 | 0.39  |
| PHEL49_591 | D-alanine-D-alanine ligase                                                                  |        |         | 4.95   |      |      |       |
| PHEL49_595 | 6-phosphogluconolactonase                                                                   | 3.30   |         | 8.70   |      |      | 0.38  |
| PHEL49_597 | molybdopterin-binding domain of aldehyde dehydrogenase                                      | 3.34   | 6.81    |        | 0.49 |      |       |
| PHEL49_598 | sulfate permease (SulP)                                                                     |        |         | 3.02   |      |      |       |
| PHEL49_599 | NUDIX hydrolase family protein                                                              |        |         | 7.75   |      |      |       |
| PHEL49_600 | orotate phosphoribosyltransferase                                                           | 11.28  |         | 11.14  |      |      | 1.01  |
| PHEL49_601 | conserved hypothetical protein containing START-like domain                                 | 275.35 | 183.87  | 160.48 | 1.50 | 0.87 | 1.72  |
| PHEL49_603 | iojap-like protein                                                                          | 48.36  | 86.68   | 38.21  | 0.56 | 0.44 | 1.27  |
| PHEL49_604 | cell division protein FtsH                                                                  | 20.41  | 132.99  | 84.27  | 0.15 | 0.63 | 0.24  |
| PHEL49_605 | conserved hypothetical protein containing 5-formyltetrahydrofolate cyclo-ligase-like domain | 58.48  | 10.03   | 28.37  | 5.83 | 2.83 | 2.06  |
| PHEL49_607 | phosphatidylserine decarboxylase                                                            | 59.58  | 26.48   | 128.38 | 2.25 | 4.85 | 0.46  |
| PHEL49_609 | Ycel-like domain protein                                                                    | 197.24 | 167.88  | 228.70 | 1.17 | 1.36 | 0.86  |
| PHEL49_610 | sugar nucleotide epimerase, Yfch                                                            | 4.23   |         | 5.57   |      |      | 0.76  |
| PHEL49_611 | conserved hypothetical protein                                                              | 13.82  | 131.71  | 126.45 | 0.10 | 0.96 | 0.11  |
| PHEL49_612 | conserved hypothetical protein, von Willebrand factor type A domain                         | 12.60  | 46.18   | 14.51  | 0.27 | 0.31 | 0.87  |
| PHEL49_613 | magnesium-chelatase subunit ChII                                                            | 35.06  | 204.88  | 98.70  | 0.17 | 0.48 | 0.36  |



|                   |                                                                 |              |               |              |             |             |             |
|-------------------|-----------------------------------------------------------------|--------------|---------------|--------------|-------------|-------------|-------------|
| PHEL49_614        | leucine aminopeptidase-related protein                          | 20.73        | 6.75          | 3.64         | 3.07        | 0.54        | 5.70        |
| PHEL49_621        | conserved hypothetical protein (DUF3050)                        |              |               | 14.38        |             |             |             |
| PHEL49_624        | two-component transcriptional regulator sigma-54                | 8.83         | 4.80          | 3.88         | 1.84        | 0.81        | 2.28        |
| PHEL49_629        | lipopolysaccharide biosynthesis protein                         | 2.26         |               |              |             |             |             |
| <b>PHEL49_634</b> | <b>putative mannosyltransferase, GT4 family</b>                 |              | <b>5.01</b>   |              |             |             |             |
| <b>PHEL49_638</b> | <b>glycosyltransferase, GT2 family</b>                          | <b>9.03</b>  |               |              |             |             |             |
| PHEL49_643        | heat shock protein 90                                           | 115.67       | 945.39        | 297.18       | 0.12        | 0.31        | 0.39        |
| PHEL49_645        | 3-oxoacyl-[acyl-carrier-protein] synthase, KASIII               | 18.30        | 23.85         | 21.69        | 0.77        | 0.91        | 0.84        |
| PHEL49_646        | conserved hypothetical protein                                  |              | 8.17          |              |             |             |             |
| PHEL49_648        | ribonuclease Z                                                  |              | 6.30          |              |             |             |             |
| PHEL49_650        | aspartate carbamoyltransferase                                  |              | 38.94         | 23.60        |             | 0.61        |             |
| PHEL49_651        | PyrR bifunctional protein                                       | 29.02        |               |              |             |             |             |
| PHEL49_654        | HlyD family secretion protein                                   |              |               | 5.09         |             |             |             |
| PHEL49_659        | shikimate 5-dehydrogenase                                       |              |               | 21.52        |             |             |             |
| PHEL49_660        | conserved hypothetical protein (DUF349)                         | 29.51        | 36.77         | 24.00        | 0.80        | 0.65        | 1.23        |
| PHEL49_661        | conserved Hypothetical protein (DUF164)                         | 241.49       | 191.22        | 136.70       | 1.26        | 0.71        | 1.77        |
| PHEL49_662        | NGG1p interacting factor 3 protein, NIF3                        | 47.40        | 24.82         | 40.12        | 1.91        | 1.62        | 1.18        |
| PHEL49_663        | tetraacyldisaccharide 4'-kinase                                 | 3.39         | 11.03         | 4.46         | 0.31        | 0.40        | 0.76        |
| PHEL49_665        | OmpA family protein                                             | 35.47        | 86.68         | 70.05        | 0.41        | 0.81        | 0.51        |
| PHEL49_666        | exopolyphosphatase                                              | 14.36        | 10.03         | 16.21        | 1.43        | 1.62        | 0.89        |
| PHEL49_667        | phosphoglycerate/bisphosphoglycerate mutase                     | 33.85        |               | 19.81        |             |             | 1.71        |
| PHEL49_668        | pyridoxamine 5'-phosphate oxidase                               | 40.62        |               | 35.66        |             |             | 1.14        |
| PHEL49_670        | hypothetical protein containing galactose binding lectin domain |              | 1.89          | 0.77         |             | 0.40        |             |
| PHEL49_672        | serine/threonine protein phosphatase                            | 7.25         |               |              |             |             |             |
| PHEL49_678        | conserved hypothetical protein                                  |              |               | 5.40         |             |             |             |
| PHEL49_679        | pyridine nucleotide-disulphide oxidoreductase                   | 2.60         |               |              |             |             |             |
| PHEL49_684        | transcriptional regulator, LacI family                          | 81.96        | 60.97         | 23.46        | 1.34        | 0.38        | 3.49        |
| PHEL49_687        | conserved hypothetical protein (DUF2797)                        | 10.92        | 14.23         |              | 0.77        |             |             |
| PHEL49_688        | GH3 auxin-responsive promoter                                   | 3.50         |               |              |             |             |             |
| PHEL49_689        | polyprenyl synthetase                                           | 21.96        | 35.78         | 26.50        | 0.61        | 0.74        | 0.83        |
| PHEL49_690        | ribosomal RNA large subunit methyltransferase N                 | 3.39         |               |              |             |             |             |
| PHEL49_691        | S-adenosylmethionine:tRNA ribosyltransferase-isomerase          | 54.17        | 68.95         | 84.70        | 0.79        | 1.23        | 0.64        |
| <b>PHEL49_693</b> | <b>glycosyltransferase, GHnc family</b>                         | <b>70.63</b> | <b>103.66</b> | <b>30.74</b> | <b>0.68</b> | <b>0.30</b> | <b>2.30</b> |
| PHEL49_698        | pyridoxine 5'-phosphate synthase                                |              |               | 6.60         |             |             |             |
| PHEL49_699        | CBS domain-containing protein                                   | 10.83        |               |              |             |             |             |
| PHEL49_700        | NAD kinase                                                      | 28.72        | 13.37         | 27.02        | 2.15        | 2.02        | 1.06        |
| PHEL49_701        | conserved hypothetical protein                                  | 5.64         |               |              |             |             |             |
| PHEL49_702        | undecaprenyl diphosphate synthase                               | 9.34         |               | 6.15         |             |             | 1.52        |
| PHEL49_703        | outer membrane protein assembly factor YaeT precursor           | 21.61        | 65.72         | 34.14        | 0.33        | 0.52        | 0.63        |
| PHEL49_704        | outer membrane protein H precursor                              | 17.92        | 22.71         | 39.33        | 0.79        | 1.73        | 0.46        |
| PHEL49_705        | outer membrane protein H precursor                              | 295.78       | 656.12        | 244.00       | 0.45        | 0.37        | 1.21        |
| PHEL49_706        | glutamate racemase                                              | 15.80        |               | 5.94         |             |             | 2.66        |

|                   |                                                                                   |             |              |              |             |             |             |
|-------------------|-----------------------------------------------------------------------------------|-------------|--------------|--------------|-------------|-------------|-------------|
| PHEL49_708        | sugar transporter                                                                 | 14.25       | 7.74         | 3.13         | 1.84        | 0.40        | 4.56        |
| <b>PHEL49_709</b> | <b>glucosylceramidase, GH30-1 family</b>                                          | <b>8.46</b> | <b>15.76</b> | <b>17.51</b> | <b>0.54</b> | <b>1.11</b> | <b>0.48</b> |
| PHEL49_717        | conserved hypothetical protein (DUF481)                                           |             |              | 20.80        |             |             |             |
| PHEL49_760        | GTP-binding protein Era                                                           | 17.92       | 84.36        | 36.71        | 0.21        | 0.44        | 0.49        |
| <b>PHEL49_761</b> | <b>putative glycoside hydrolase, GH16 family</b>                                  | <b>3.17</b> |              |              |             |             |             |
| PHEL49_764        | S-adenosyl-L-homocysteine hydrolase                                               | 117.08      | 117.22       | 130.01       | 1.00        | 1.11        | 0.90        |
| PHEL49_765        | siderophore (surfactin) biosynthesis regulatory protein                           | 8.46        |              |              |             |             |             |
| PHEL49_770        | TonB-dependent receptor, plug                                                     | 12.65       |              | 91.11        |             |             | 0.14        |
| PHEL49_773        | metallo-beta-lactamase superfamily protein                                        | 5.31        | 36.77        | 6.99         | 0.14        | 0.19        | 0.76        |
| PHEL49_775        | holliday junction DNA helicase RuvB                                               | 48.11       | 5.81         | 14.08        | 8.29        | 2.42        | 3.42        |
| PHEL49_777        | cytochrome c oxidase polypeptide II                                               | 69.44       | 76.38        | 52.58        | 0.91        | 0.69        | 1.32        |
| PHEL49_778        | conserved hypothetical membrane protein                                           | 11.08       |              |              |             |             |             |
| PHEL49_779        | cytochrome c family protein                                                       | 240.36      | 148.93       | 205.05       | 1.61        | 1.38        | 1.17        |
| PHEL49_780        | ABC-type Fe <sup>3+</sup> transport system protein / molybdenum transport protein | 37.24       |              | 40.12        |             |             | 0.93        |
| PHEL49_781        | molybdopterin oxidoreductase                                                      | 27.81       | 13.79        | 7.96         | 2.02        | 0.58        | 3.49        |
| PHEL49_782        | molybdopterin oxidoreductase, iron-sulfur binding subunit                         | 68.92       | 80.77        | 100.30       | 0.85        | 1.24        | 0.69        |
| PHEL49_783        | cytochrome c                                                                      | 49.65       | 78.45        | 55.47        | 0.63        | 0.71        | 0.90        |
| PHEL49_784        | sporulation domain-containing protein                                             | 14.51       |              |              |             |             |             |
| PHEL49_785        | translation initiation factor IF-2                                                | 120.44      | 156.99       | 75.44        | 0.77        | 0.48        | 1.60        |
| PHEL49_786        | transcription elongation factor NusA                                              | 99.40       | 169.00       | 140.37       | 0.59        | 0.83        | 0.71        |
| PHEL49_789        | universal stress protein UspA                                                     | 40.62       | 8.83         | 28.53        | 4.60        | 3.23        | 1.42        |
| PHEL49_790        | glyceraldehyde-3-phosphate dehydrogenase                                          | 52.79       | 91.62        | 111.82       | 0.58        | 1.22        | 0.47        |
| PHEL49_792        | ketol-acid reductoisomerase                                                       | 93.75       | 59.40        | 192.02       | 1.58        | 3.23        | 0.49        |
| PHEL49_793        | acetolactate synthase small subunit                                               |             |              | 106.98       |             |             |             |
| PHEL49_794        | acetolactate synthase large subunit                                               | 31.17       | 33.27        | 90.57        | 0.94        | 2.72        | 0.34        |
| PHEL49_795        | dihydroxy-acid dehydratase                                                        | 13.77       | 14.96        | 39.29        | 0.92        | 2.63        | 0.35        |
| PHEL49_796        | 3-isopropylmalate dehydrogenase                                                   | 3.30        |              |              |             |             |             |
| PHEL49_798        | conserved hypothetical protein                                                    | 5.46        |              | 11.50        |             |             | 0.47        |
| PHEL49_799        | aspartokinase / homoserine dehydrogenase                                          | 9.78        | 12.26        | 42.60        | 0.80        | 3.47        | 0.23        |
| PHEL49_800        | homoserine kinase                                                                 |             |              | 5.57         |             |             |             |
| PHEL49_801        | threonine synthase                                                                |             | 11.49        | 11.14        |             | 0.97        |             |
| PHEL49_803        | conserved hypothetical membrane protein (DUF2723)                                 | 15.23       | 24.82        | 12.63        | 0.61        | 0.51        | 1.21        |
| PHEL49_806        | DNA polymerase I                                                                  | 36.70       | 48.46        | 31.66        | 0.76        | 0.65        | 1.16        |
| PHEL49_811        | hemolysin                                                                         | 4.91        |              |              |             |             |             |
| PHEL49_814        | fructose-1,6-bisphosphatase, type I                                               | 55.24       | 14.52        | 4.69         | 3.81        | 0.32        | 11.77       |
| PHEL49_815        | manganese superoxide dismutase                                                    | 384.70      | 391.14       | 340.40       | 0.98        | 0.87        | 1.13        |
| PHEL49_816        | amidophosphoribosyltransferase                                                    | 36.68       | 30.64        | 48.29        | 1.20        | 1.58        | 0.76        |
| PHEL49_817        | ribokinase                                                                        | 65.72       | 107.08       | 97.02        | 0.61        | 0.91        | 0.68        |
| PHEL49_818        | sulfur acceptor protein SufE for iron-sulfur cluster assembly                     | 46.55       |              |              |             |             |             |
| PHEL49_819        | FeS assembly SUF protein                                                          | 62.07       |              |              |             |             |             |
| PHEL49_822        | conserved hypothetical protein (DUF3078)                                          | 149.78      | 40.12        | 121.57       | 3.73        | 3.03        | 1.23        |
| PHEL49_823        | CBS domain-containing protein                                                     | 6.45        |              |              |             |             |             |

|                   |                                                                            |             |        |        |      |      |      |
|-------------------|----------------------------------------------------------------------------|-------------|--------|--------|------|------|------|
| PHEL49_824        | GTP-binding protein HflX                                                   | 14.72       | 16.79  | 17.44  | 0.88 | 1.04 | 0.84 |
| PHEL49_827        | conserved hypothetical protein                                             | 6.45        |        | 25.47  |      |      | 0.25 |
| PHEL49_828        | conserved hypothetical membrane protein                                    | 14.11       |        | 29.72  |      |      | 0.47 |
| PHEL49_831        | aspartyl-tRNA synthetase                                                   | 52.32       | 60.17  | 77.00  | 0.87 | 1.28 | 0.68 |
| PHEL49_833        | rRNA small subunit methyltransferase I                                     |             |        | 10.70  |      |      |      |
| PHEL49_834        | conserved hypothetical protein                                             | 2.88        | 4.69   | 9.48   | 0.61 | 2.02 | 0.30 |
| PHEL49_838        | nitrate ABC transporter, nitrate-binding protein                           |             |        | 55.94  |      |      |      |
| PHEL49_841        | periplasmic nitrate reductase/nitrite reductase                            |             |        | 4.08   |      |      |      |
| PHEL49_842        | transcriptional regulator, LuxR family                                     | 16.25       |        |        |      |      |      |
| PHEL49_843        | multi-sensor signal transduction histidine kinase                          |             |        | 6.56   |      |      |      |
| PHEL49_845        | nitrite reductase (NAD(P)H) small subunit                                  |             |        | 63.68  |      |      |      |
| PHEL49_846        | nitrite reductase (NAD(P)H) large subunit                                  |             |        | 19.38  |      |      |      |
| PHEL49_850        | UDP-2,3-diacetylglucosamine hydrolase                                      |             |        | 5.75   |      |      |      |
| PHEL49_852        | MoxR-like ATPase in aerotolerance operon                                   | 124.44      | 488.99 | 238.54 | 0.25 | 0.49 | 0.52 |
| PHEL49_853        | conserved hypothetical protein (DUF58)                                     |             | 16.72  | 10.81  |      | 0.65 |      |
| PHEL49_854        | conserved hypothetical protein                                             | 14.36       | 143.75 | 43.23  | 0.10 | 0.30 | 0.33 |
| PHEL49_855        | BatA                                                                       |             | 31.93  | 9.38   |      | 0.29 |      |
| PHEL49_856        | BatB                                                                       | 15.62       | 42.43  | 22.86  | 0.37 | 0.54 | 0.68 |
| PHEL49_857        | BatC                                                                       | 12.70       | 17.24  | 16.72  | 0.74 | 0.97 | 0.76 |
| PHEL49_858        | BatD                                                                       | 5.05        | 34.58  | 18.63  | 0.15 | 0.54 | 0.27 |
| PHEL49_859        | BatE                                                                       | 21.01       | 60.87  | 43.04  | 0.35 | 0.71 | 0.49 |
| PHEL49_861        | sulfate transporter                                                        | 3.56        | 5.81   |        | 0.61 |      |      |
| PHEL49_863        | carbonic anhydrase                                                         | 135.42      | 275.80 | 48.63  | 0.49 | 0.18 | 2.78 |
| PHEL49_864        | sulfate transporter                                                        | 4.04        |        |        |      |      |      |
| PHEL49_865        | carbonic anhydrase                                                         | 282.61      | 215.84 | 201.56 | 1.31 | 0.93 | 1.40 |
| PHEL49_872        | methionyl-tRNA synthetase                                                  | 21.10       | 40.12  | 32.42  | 0.53 | 0.81 | 0.65 |
| PHEL49_874        | isoquinoline 1-oxidoreductase beta subunit                                 |             |        | 2.17   |      |      |      |
| PHEL49_891        | two-component system response regulator                                    | 22.57       | 8.49   | 32.00  | 2.66 | 3.77 | 0.71 |
| PHEL49_892        | sensory transduction histidine kinase                                      | 2.82        | 7.66   | 17.34  | 0.37 | 2.26 | 0.16 |
| PHEL49_910        | inosine monophosphate dehydrogenase-related protein                        | 244.50      |        | 29.72  |      |      | 8.23 |
| PHEL49_911        | peptidase, M28 family                                                      | 2.33        |        |        |      |      |      |
| PHEL49_912        | pyruvate kinase                                                            | 94.54       | 154.03 | 191.76 | 0.61 | 1.24 | 0.49 |
| PHEL49_913        | conserved hypothetical protein                                             | 15.05       |        | 14.86  |      |      | 1.01 |
| PHEL49_915        | 3-oxoacyl-[acyl-carrier-protein] synthase, KASII                           | 29.24       | 20.06  | 36.47  | 1.46 | 1.82 | 0.80 |
| PHEL49_917        | phosphoribosylglycinamide formyltransferase                                | 24.62       | 25.07  | 52.68  | 0.98 | 2.10 | 0.47 |
| PHEL49_918        | ribonuclease HI-related protein 3                                          | 8.46        |        |        |      |      |      |
| PHEL49_919        | succinate dehydrogenase iron-sulfur protein                                | 50.05       | 76.74  | 186.06 | 0.65 | 2.42 | 0.27 |
| PHEL49_920        | succinate dehydrogenase flavoprotein subunit                               | 83.26       | 184.86 | 208.42 | 0.45 | 1.13 | 0.40 |
| PHEL49_921        | succinate dehydrogenase cytochrome b subunit                               | 59.58       | 35.30  | 71.32  | 1.69 | 2.02 | 0.84 |
| PHEL49_923        | conserved hypothetical protein containing Kelch-type beta propeller domain | 3.56        | 316.45 | 53.96  | 0.01 | 0.17 | 0.07 |
| <b>PHEL49_926</b> | <b>glycoside hydrolase, GHnc family</b>                                    | <b>7.74</b> |        |        |      |      |      |
| PHEL49_928        | ATP-dependent RNA helicase RhlE                                            | 25.39       | 20.69  | 7.43   | 1.23 | 0.36 | 3.42 |

|                   |                                                                                      |             |        |        |      |      |      |
|-------------------|--------------------------------------------------------------------------------------|-------------|--------|--------|------|------|------|
| PHEL49_929        | Xaa-Pro aminopeptidase, M24 family                                                   | 30.40       | 27.02  | 34.57  | 1.13 | 1.28 | 0.88 |
| PHEL49_933        | beta-lactamase                                                                       | 2.33        |        |        |      |      |      |
| <b>PHEL49_935</b> | <b>glycoside hydrolase, GHnc family</b>                                              | <b>2.02</b> |        |        |      |      |      |
| PHEL49_937        | thiamine-monophosphate kinase                                                        | 35.64       | 43.55  | 30.50  | 0.82 | 0.70 | 1.17 |
| PHEL49_938        | conserved hypothetical protein                                                       | 67.71       | 108.28 | 23.11  | 0.63 | 0.21 | 2.93 |
| PHEL49_940        | conserved hypothetical protein, quinonprotein alcohol dehydrogenase-like superfamily |             | 22.98  | 3.71   |      | 0.16 |      |
| PHEL49_944        | iron-sulfur cluster assembly protein SufB                                            | 43.88       | 24.52  | 37.97  | 1.79 | 1.55 | 1.16 |
| PHEL49_945        | iron-sulfur cluster assembly ATPase protein SufC                                     | 67.71       | 31.52  | 66.86  | 2.15 | 2.12 | 1.01 |
| PHEL49_946        | iron-sulfur cluster assembly protein SufD                                            | 23.49       | 4.50   | 10.92  | 5.22 | 2.42 | 2.15 |
| PHEL49_949        | cysteine desulfurase                                                                 |             |        | 5.94   |      |      |      |
| PHEL49_950        | zinc-dependent metalloprotease                                                       |             | 29.03  |        |      |      |      |
| PHEL49_952        | G-D-S-L family lipolytic protein                                                     | 212.24      | 55.16  | 24.00  | 3.85 | 0.44 | 8.84 |
| PHEL49_953        | TonB-dependent receptor, plug                                                        | 580.08      | 310.81 | 132.01 | 1.87 | 0.42 | 4.39 |
| PHEL49_955        | seryl-tRNA synthetase                                                                | 43.73       | 34.48  | 52.01  | 1.27 | 1.51 | 0.84 |
| PHEL49_958        | conserved hypothetical protein (DUF4286)                                             | 10.42       |        |        |      |      |      |
| PHEL49_959        | dimethyladenosine transferase                                                        | 4.51        |        |        |      |      |      |
| PHEL49_960        | Mg/Co/Ni transporter MgtE / CBS domain                                               | 10.83       | 22.06  | 19.61  | 0.49 | 0.89 | 0.55 |
| PHEL49_962        | histidine kinase                                                                     |             |        | 2.20   |      |      |      |
| PHEL49_963        | SpoU rRNA methylase family protein                                                   | 54.17       | 82.74  | 71.32  | 0.65 | 0.86 | 0.76 |
| PHEL49_964        | DNA mismatch repair protein MutS                                                     | 8.89        | 7.80   | 3.60   | 1.14 | 0.46 | 2.47 |
| PHEL49_967        | conserved hypothetical protein                                                       |             | 7.70   | 4.15   |      | 0.54 |      |
| PHEL49_969        | twin-arginine translocation protein TatA                                             | 40.62       |        | 17.83  |      |      | 2.28 |
| PHEL49_970        | O-methyltransferase                                                                  | 19.75       |        | 7.43   |      |      | 2.66 |
| PHEL49_972        | RNA polymerase sigma-70 factor                                                       | 27.70       |        |        |      |      |      |
| PHEL49_973        | 3-methyl-2-oxobutanoate hydroxymethyltransferase                                     | 54.17       |        | 56.46  |      |      | 0.96 |
| PHEL49_974        | D-3-phosphoglycerate dehydrogenase                                                   | 3.87        |        |        |      |      |      |
| PHEL49_979        | glucose inhibited division protein A                                                 | 17.66       | 20.79  | 23.26  | 0.85 | 1.12 | 0.76 |
| PHEL49_983        | glutamyl-tRNA synthetase                                                             | 21.01       | 51.36  | 30.74  | 0.41 | 0.60 | 0.68 |
| PHEL49_985        | membrane protease                                                                    | 433.33      | 633.55 | 320.95 | 0.68 | 0.51 | 1.35 |
| PHEL49_987        | conserved hypothetical protein (DUF2807)                                             | 56.87       | 92.67  | 260.33 | 0.61 | 2.81 | 0.22 |
| PHEL49_988        | ribonuclease R                                                                       | 9.56        | 18.17  | 8.39   | 0.53 | 0.46 | 1.14 |
| PHEL49_992        | ribose 5-phosphate isomerase B                                                       | 97.33       |        |        |      |      |      |
| PHEL49_995        | aldose 1-epimerase                                                                   | 38.37       | 36.77  | 53.49  | 1.04 | 1.45 | 0.72 |
| PHEL49_996        | recombinase RecA                                                                     | 167.39      | 346.28 | 205.55 | 0.48 | 0.59 | 0.81 |
| PHEL49_998        | deoxyuridine 5'-triphosphate nucleotidohydrolase                                     | 31.60       |        |        |      |      |      |
| PHEL49_1000       | conserved hypothetical protein                                                       | 148.96      | 39.72  | 78.45  | 3.75 | 1.98 | 1.90 |
| PHEL49_1004       | glycerol-3-phosphate dehydrogenase (FAD)                                             | 15.29       | 17.79  | 25.88  | 0.86 | 1.45 | 0.59 |
| PHEL49_1005       | pyridoxamine 5'-phosphate oxidase                                                    | 25.79       |        | 16.98  |      |      | 1.52 |
| PHEL49_1013       | phenylalanyl-tRNA synthetase subunit alpha                                           | 93.75       | 90.52  | 114.30 | 1.04 | 1.26 | 0.82 |
| PHEL49_1014       | NADP-specific glutamate dehydrogenase                                                | 536.25      | 139.00 | 92.72  | 3.86 | 0.67 | 5.78 |
| PHEL49_1019       | oxidoreductase                                                                       | 25.79       | 18.39  | 6.37   | 1.40 | 0.35 | 4.05 |

|                    |                                                              |               |               |               |             |             |             |
|--------------------|--------------------------------------------------------------|---------------|---------------|---------------|-------------|-------------|-------------|
| PHEL49_1022        | naringenin-chalcone synthase                                 | 6.94          |               | 11.43         |             |             | 0.61        |
| PHEL49_1030        | conserved hypothetical protein                               | 21.38         |               | 23.46         |             |             | 0.91        |
| PHEL49_1031        | thioredoxin                                                  | 67.71         | 9.59          | 54.27         | 7.06        | 5.66        | 1.25        |
| PHEL49_1033        | conserved hypothetical protein containing SnoaL-like domain  | 20.31         |               | 17.83         |             |             | 1.14        |
| PHEL49_1035        | acriflavin resistance protein                                | 19.79         | 33.10         | 17.83         | 0.60        | 0.54        | 1.11        |
| PHEL49_1036        | efflux transporter, RND family, MFP subunit                  | 42.51         | 79.53         | 130.62        | 0.53        | 1.64        | 0.33        |
| PHEL49_1037        | outer membrane efflux protein                                | 7.67          | 12.49         | 23.55         | 0.61        | 1.89        | 0.33        |
| PHEL49_1038        | transcriptional regulator, TetR family                       | 9.67          |               | 16.98         |             |             | 0.57        |
| PHEL49_1039        | polyprenyl synthetase                                        | 5.49          |               |               |             |             |             |
| PHEL49_1042        | prolyl endopeptidase                                         | 15.88         | 20.43         | 23.11         | 0.78        | 1.13        | 0.69        |
| PHEL49_1049        | ABC transporter, ATP-binding protein                         | 5.21          |               |               |             |             |             |
| PHEL49_1050        | SprE, gliding motility protein                               | 26.29         | 24.66         | 18.88         | 1.07        | 0.77        | 1.39        |
| PHEL49_1054        | ATP synthase A chain                                         | 17.73         | 21.01         | 21.23         | 0.84        | 1.01        | 0.84        |
| PHEL49_1056        | ATP synthase B chain                                         | 383.68        | 275.80        | 421.00        | 1.39        | 1.53        | 0.91        |
| PHEL49_1057        | ATP synthase delta chain                                     | 109.62        | 52.53         | 148.59        | 2.09        | 2.83        | 0.74        |
| PHEL49_1058        | ATP synthase alpha chain                                     | 261.16        | 366.42        | 364.57        | 0.71        | 0.99        | 0.72        |
| PHEL49_1059        | ATP synthase gamma chain                                     | 86.75         | 144.80        | 130.94        | 0.60        | 0.90        | 0.66        |
| PHEL49_1060        | conserved hypothetical protein                               | 67.71         | 42.90         | 79.25         | 1.58        | 1.85        | 0.85        |
| PHEL49_1062        | oxidoreductase, short chain dehydrogenase/reductase family   | 21.76         |               | 28.66         |             |             | 0.76        |
| PHEL49_1066        | aldehyde dehydrogenase B                                     | 288.07        | 84.24         | 118.33        | 3.42        | 1.40        | 2.43        |
| PHEL49_1067        | asparaginase                                                 | 58.30         | 27.58         | 42.10         | 2.11        | 1.53        | 1.38        |
| PHEL49_1072        | tyrosyl-tRNA synthetase                                      | 31.03         | 25.28         | 29.72         | 1.23        | 1.18        | 1.04        |
| PHEL49_1073        | 3-beta hydroxysteroid dehydrogenase/isomerase family protein |               |               | 7.04          |             |             |             |
| PHEL49_1075        | dihydroorotase                                               | 5.42          | 17.65         | 3.57          | 0.31        | 0.20        | 1.52        |
| PHEL49_1079        | uroporphyrinogen-III synthase HemD, putative                 | 36.27         | 47.28         | 105.07        | 0.77        | 2.22        | 0.35        |
| PHEL49_1080        | DNA repair protein RadA                                      | 16.25         | 46.33         | 23.18         | 0.35        | 0.50        | 0.70        |
| PHEL49_1083        | pantoate-beta-alanine ligase                                 | 6.16          |               |               |             |             |             |
| <b>PHEL49_1084</b> | <b>glycosyltransferase, GT5 family</b>                       | <b>198.76</b> | <b>227.76</b> | <b>310.60</b> | <b>0.87</b> | <b>1.36</b> | <b>0.64</b> |
| PHEL49_1085        | conserved hypothetical protein (DUF4270)                     | 18.23         | 137.90        | 24.00         | 0.13        | 0.17        | 0.76        |
| PHEL49_1086        | glucosamine-fructose-6-phosphate aminotransferase            | 20.61         | 44.77         | 41.35         | 0.46        | 0.92        | 0.50        |
| PHEL49_1091        | deoxyribose-phosphate aldolase                               | 43.53         | 11.82         | 35.02         | 3.68        | 2.96        | 1.24        |
| PHEL49_1093        | aldo/keto reductase                                          | 65.97         | 87.69         | 82.29         | 0.75        | 0.94        | 0.80        |
| PHEL49_1094        | phosphoglycerate kinase                                      | 55.11         | 156.50        | 236.36        | 0.35        | 1.51        | 0.23        |
| PHEL49_1095        | DNA polymerase III subunit delta                             | 7.87          |               |               |             |             |             |
| PHEL49_1097        | 4-hydroxythreonine-4-phosphate dehydrogenase                 | 69.49         | 81.29         | 103.23        | 0.85        | 1.27        | 0.67        |
| PHEL49_1099        | LSU ribosomal protein L32                                    | 33.85         |               |               |             |             |             |
| PHEL49_1100        | 3-oxoacyl-[acyl-carrier-protein] synthase, KASIII            | 144.82        | 162.42        | 89.15         | 0.89        | 0.55        | 1.62        |
| PHEL49_1101        | acetyl-CoA carboxylase, biotin carboxyl carrier protein      | 203.12        | 227.13        | 298.92        | 0.89        | 1.32        | 0.68        |
| PHEL49_1102        | acetyl-CoA carboxylase, biotin carboxylase                   | 117.81        | 154.45        | 149.78        | 0.76        | 0.97        | 0.79        |
| PHEL49_1103        | transcriptional regulator, AsnC family                       | 79.66         |               |               |             |             |             |
| PHEL49_1107        | carboxymuconolactone decarboxylase                           | 52.32         |               | 20.26         |             |             | 2.58        |
| PHEL49_1108        | OsmC family protein                                          | 38.09         |               |               |             |             |             |

|                    |                                                                                    |              |              |              |             |             |             |
|--------------------|------------------------------------------------------------------------------------|--------------|--------------|--------------|-------------|-------------|-------------|
| PHEL49_1110        | helicase                                                                           | 7.44         | 4.85         | 1.96         | 1.53        | 0.40        | 3.80        |
| PHEL49_1112        | 2-oxoglutarate dehydrogenase, E2 subunit                                           | 111.80       | 223.21       | 184.53       | 0.50        | 0.83        | 0.61        |
| PHEL49_1114        | 2-oxoglutarate dehydrogenase, E1 subunit                                           | 37.76        | 76.38        | 66.86        | 0.49        | 0.88        | 0.56        |
| PHEL49_1124        | tRNA-guanine transglycosylase                                                      | 18.90        | 23.09        | 22.81        | 0.82        | 0.99        | 0.83        |
| PHEL49_1127        | acetyl-coenzyme A carboxyl transferase alpha chain                                 | 92.16        | 85.80        | 153.54       | 1.07        | 1.79        | 0.60        |
| PHEL49_1128        | thiol:disulfide interchange protein TlpA                                           | 5.21         | 39.60        | 93.72        | 0.13        | 2.37        | 0.06        |
| PHEL49_1129        | histidine ammonia-lyase                                                            | 16.30        | 10.21        | 3.30         | 1.60        | 0.32        | 4.94        |
| PHEL49_1130        | ATP-dependent Clp protease, ATP-binding subunit ClpC                               | 129.77       | 171.23       | 87.30        | 0.76        | 0.51        | 1.49        |
| PHEL49_1131        | DNA gyrase subunit A                                                               | 166.39       | 200.69       | 87.26        | 0.83        | 0.43        | 1.91        |
| PHEL49_1132        | tetratricopeptide repeat family protein                                            | 239.14       | 178.39       | 73.98        | 1.34        | 0.41        | 3.23        |
| PHEL49_1133        | NlpC/P60 family protein                                                            | 7.25         |              | 22.29        |             |             | 0.33        |
| PHEL49_1134        | acetyl-CoA acetyltransferase                                                       | 107.34       | 166.83       | 130.47       | 0.64        | 0.78        | 0.82        |
| PHEL49_1135        | HD family protein                                                                  | 10.42        |              | 2.29         |             |             | 4.56        |
| PHEL49_1139        | CHU large protein; gliding motility-related protein; possible adhesin AidA-related | 2.05         |              | 0.90         |             |             | 2.28        |
| PHEL49_1141        | glutamate synthase (NADPH) small chain                                             |              |              | 61.09        |             |             |             |
| PHEL49_1142        | glutamate synthase (NADPH) large chain                                             | 7.25         | 59.76        | 215.45       | 0.12        | 3.61        | 0.03        |
| PHEL49_1144        | nitrogen regulatory protein P-II                                                   | 83.33        | 212.15       | 212.60       | 0.39        | 1.00        | 0.39        |
| PHEL49_1146        | conserved hypothetical protein (DUF1597)                                           |              |              | 611.33       |             |             |             |
| PHEL49_1148        | butyryl-CoA dehydrogenase                                                          | 288.57       | 254.79       | 101.89       | 1.13        | 0.40        | 2.83        |
| PHEL49_1150        | Glu/Leu/Phe/Val dehydrogenase family protein                                       | 46.64        | 51.48        | 47.55        | 0.91        | 0.92        | 0.98        |
| PHEL49_1152        | MotA/TolQ/ExbB proton channel family protein                                       | 59.58        | 83.84        | 131.95       | 0.71        | 1.57        | 0.45        |
| PHEL49_1155        | dihydrofolate synthase / folylpoly glutamate synthase                              |              | 17.16        |              |             |             |             |
| PHEL49_1157        | PAP2 superfamily protein                                                           |              |              | 26.50        |             |             |             |
| PHEL49_1159        | UDP-glucose dehydrogenase                                                          | 25.39        | 27.58        | 24.15        | 0.92        | 0.88        | 1.05        |
| PHEL49_1160        | oxidoreductase                                                                     |              | 21.45        | 9.91         |             | 0.46        |             |
| PHEL49_1162        | glycerol-3-phosphate cytidyltransferase                                            | 127.45       | 90.85        | 194.04       | 1.40        | 2.14        | 0.66        |
| PHEL49_1163        | GDP-L-fucose synthetase                                                            | 37.62        | 6.13         | 54.48        | 6.14        | 8.89        | 0.69        |
| PHEL49_1165        | GDP-mannose 4,6-dehydratase                                                        | 148.31       | 126.08       | 212.27       | 1.18        | 1.68        | 0.70        |
| PHEL49_1166        | UDP-glucose 6-dehydrogenase                                                        | 36.46        | 19.09        | 113.16       | 1.91        | 5.93        | 0.32        |
| PHEL49_1167        | dTDP-glucose 4,6-dehydratase                                                       | 266.96       | 179.66       | 290.38       | 1.49        | 1.62        | 0.92        |
| PHEL49_1168        | UDP-glucuronate 5'-epimerase                                                       | 35.64        | 43.55        | 46.92        | 0.82        | 1.08        | 0.76        |
| PHEL49_1169        | dTDP-glucose 4,6-dehydratase                                                       | 55.86        | 85.50        | 111.44       | 0.65        | 1.30        | 0.50        |
| PHEL49_1170        | glucose-1-phosphate thymidyltransferase                                            | 75.92        | 113.66       | 289.07       | 0.67        | 2.54        | 0.26        |
| PHEL49_1171        | dTDP-4-dehydrorhamnose 3,5-epimerase                                               | 15.39        |              | 8.10         |             |             | 1.90        |
| PHEL49_1172        | dTDP-4-dehydrorhamnose reductase                                                   | 107.91       | 72.40        | 164.38       | 1.49        | 2.27        | 0.66        |
| PHEL49_1173        | LPS polysaccharide biosynthesis protein                                            | 3.98         |              |              |             |             |             |
| <b>PHEL49_1176</b> | <b>glycosyltransferase WbsX family protein</b>                                     | <b>20.00</b> | <b>7.52</b>  | <b>44.58</b> | <b>2.66</b> | <b>5.93</b> | <b>0.45</b> |
| <b>PHEL49_1177</b> | <b>glycosyltransferase WbsX family protein</b>                                     | <b>45.14</b> | <b>39.40</b> | <b>59.44</b> | <b>1.15</b> | <b>1.51</b> | <b>0.76</b> |
| <b>PHEL49_1180</b> | <b>glycosyltransferase, GT4 family</b>                                             | <b>18.73</b> |              | <b>26.56</b> |             |             | <b>0.71</b> |
| PHEL49_1182        | dTDP-4-dehydrorhamnose reductase                                                   | 199.02       | 183.87       | 316.09       | 1.08        | 1.72        | 0.63        |
| <b>PHEL49_1183</b> | <b>glycosyltransferase, GT4 family</b>                                             |              |              | <b>6.37</b>  |             |             |             |

|                    |                                                                                      |              |              |              |             |             |             |  |
|--------------------|--------------------------------------------------------------------------------------|--------------|--------------|--------------|-------------|-------------|-------------|--|
| PHEL49_1184        | undecaprenyl-phosphate glucose phosphotransferase                                    | 36.36        |              |              |             |             |             |  |
| PHEL49_1185        | polysaccharide export outer membrane protein                                         | 116.74       | 95.10        | 147.56       | 1.23        | 1.55        | 0.79        |  |
| PHEL49_1186        | tyrosine-protein kinase involved in exopolysaccharide biosynthesis                   | 47.93        | 40.91        | 72.12        | 1.17        | 1.76        | 0.66        |  |
| PHEL49_1188        | capsular polysaccharide biosynthesis protein                                         | 4.67         |              |              |             |             |             |  |
| PHEL49_1189        | conserved hypothetical protein, BadF/BadG/BcrA/BcrD ATPase family                    | 50.78        | 48.27        | 147.66       | 1.05        | 3.06        | 0.34        |  |
| PHEL49_1190        | UDP-N-acetylmuramoylalanyl-D-glutamyl-2,6- diaminopimelate-D-alanyl-D-alanine ligase | 5.76         | 4.69         | 9.48         | 1.23        | 2.02        | 0.61        |  |
| PHEL49_1191        | gliding motility protein GldJ                                                        | 60.53        | 38.45        | 58.08        | 1.57        | 1.51        | 1.04        |  |
| PHEL49_1192        | conserved hypothetical protein, putative peptidase, C25 family                       | 15.58        | 12.26        | 7.08         | 1.27        | 0.58        | 2.20        |  |
| PHEL49_1193        | conserved hypothetical protein                                                       | 143.67       | 166.83       | 132.64       | 0.86        | 0.80        | 1.08        |  |
| PHEL49_1196        | 3-oxoacyl-[acyl-carrier-protein] synthase, KASIII                                    | 27.78        | 14.14        | 22.86        | 1.96        | 1.62        | 1.22        |  |
| PHEL49_1197        | GMP synthase (glutamine-hydrolyzing)                                                 | 37.48        | 47.28        | 35.02        | 0.79        | 0.74        | 1.07        |  |
| <b>PHEL49_1198</b> | <b>peptidoglycan-binding LysM domain protein, CBM50 domain</b>                       | <b>20.75</b> | <b>12.46</b> | <b>23.01</b> | <b>1.67</b> | <b>1.85</b> | <b>0.90</b> |  |
| PHEL49_1199        | conserved hypothetical protein                                                       | 71.09        |              | 71.32        |             |             | 1.00        |  |
| PHEL49_1200        | cytochrome c assembly protein                                                        | 23.86        | 8.14         | 15.35        | 2.93        | 1.89        | 1.56        |  |
| PHEL49_1201        | peptidase, M20 family                                                                | 48.55        | 52.04        | 21.87        | 0.93        | 0.42        | 2.22        |  |
| PHEL49_1202        | cardiolipin synthetase                                                               | 5.84         |              |              |             |             |             |  |
| PHEL49_1203        | methylmalonyl-CoA mutase large subunit                                               | 10.69        | 10.16        | 9.38         | 1.05        | 0.92        | 1.14        |  |
| PHEL49_1204        | methylmalonyl-CoA mutase small subunit                                               |              | 6.36         | 3.43         |             | 0.54        |             |  |
| PHEL49_1206        | uridine kinase                                                                       | 114.81       | 163.08       | 69.77        | 0.70        | 0.43        | 1.65        |  |
| PHEL49_1207        | ABC1 family protein                                                                  | 2.71         | 39.72        | 35.66        | 0.07        | 0.90        | 0.08        |  |
| PHEL49_1208        | conserved hypothetical protein                                                       |              | 41.37        | 85.44        |             | 2.07        |             |  |
| PHEL49_1210        | conserved hypothetical protein                                                       | 26.67        | 183.87       | 83.75        | 0.15        | 0.46        | 0.32        |  |
| PHEL49_1213        | conserved hypothetical protein                                                       | 236.98       | 27.58        | 57.95        | 8.59        | 2.10        | 4.09        |  |
| PHEL49_1214        | glycerol-3-phosphate dehydrogenase (NAD(P)+)                                         | 203.12       | 91.93        | 99.06        | 2.21        | 1.08        | 2.05        |  |
| PHEL49_1215        | acyltransferase                                                                      | 2.77         | 2.71         | 9.50         | 1.02        | 3.50        | 0.29        |  |
| PHEL49_1218        | conserved hypothetical protein, putative acyltransferase                             | 13.74        | 6.40         | 18.09        | 2.15        | 2.83        | 0.76        |  |
| PHEL49_1220        | deoxyribodipyrimidine photolyase                                                     | 39.83        | 84.36        | 22.73        | 0.47        | 0.27        | 1.75        |  |
| PHEL49_1221        | conserved hypothetical protein                                                       | 82.75        | 79.68        | 89.15        | 1.04        | 1.12        | 0.93        |  |
| PHEL49_1224        | glutathione peroxidase                                                               | 142.94       | 190.00       | 188.21       | 0.75        | 0.99        | 0.76        |  |
| PHEL49_1225        | short chain dehydrogenase                                                            | 205.83       | 397.15       | 267.46       | 0.52        | 0.67        | 0.77        |  |
| PHEL49_1226        | conserved hypothetical protein                                                       | 15.05        |              |              |             |             |             |  |
| PHEL49_1228        | GTP cyclohydrolase I                                                                 | 93.75        | 186.70       | 257.17       | 0.50        | 1.38        | 0.36        |  |
| PHEL49_1231        | cryptochrome                                                                         | 4.59         | 14.96        | 15.11        | 0.31        | 1.01        | 0.30        |  |
| PHEL49_1232        | deoxyribodipyrimidine photolyase                                                     | 54.64        | 168.38       | 51.61        | 0.32        | 0.31        | 1.06        |  |
| PHEL49_1233        | cryptochrome, DASH family                                                            | 41.16        | 127.63       | 54.19        | 0.32        | 0.42        | 0.76        |  |
| PHEL49_1234        | NAD-dependent epimerase/dehydratase                                                  | 20.06        | 42.90        | 33.02        | 0.47        | 0.77        | 0.61        |  |
| PHEL49_1235        | flavin reductase domain-containing FMN-binding protein                               | 76.17        | 257.41       | 89.15        | 0.30        | 0.35        | 0.85        |  |
| PHEL49_1237        | thioredoxin reductase                                                                | 19.91        | 32.45        | 18.35        | 0.61        | 0.57        | 1.08        |  |
| PHEL49_1240        | acyl-CoA dehydrogenase                                                               | 1216.69      | 666.94       | 536.27       | 1.82        | 0.80        | 2.27        |  |
| PHEL49_1241        | acetyl-CoA acetyltransferase                                                         | 1091.20      | 1416.21      | 568.09       | 0.77        | 0.40        | 1.92        |  |
| PHEL49_1242        | 3-hydroxyacyl-CoA dehydrogenase                                                      | 844.45       | 1104.44      | 507.87       | 0.76        | 0.46        | 1.66        |  |

|                    |                                                                                |               |               |               |             |             |              |
|--------------------|--------------------------------------------------------------------------------|---------------|---------------|---------------|-------------|-------------|--------------|
| PHEL49_1244        | sulfate/thiosulfate import ATP-binding protein CysA                            | 19.35         | 40.98         | 45.85         | 0.47        | 1.12        | 0.42         |
| PHEL49_1245        | ABC transporter, permease protein                                              | 43.22         | 30.51         | 43.63         | 1.42        | 1.43        | 0.99         |
| PHEL49_1247        | two-component sigma-54 specific transcriptional regulator                      | 3.15          | 12.83         |               | 0.25        |             |              |
| <b>PHEL49_1248</b> | <b>catalase / peroxidase</b>                                                   | <b>342.72</b> | <b>118.49</b> | <b>156.29</b> | <b>2.89</b> | <b>1.32</b> | <b>2.19</b>  |
| PHEL49_1249        | peroxiredoxin                                                                  | 22.57         |               | 96.58         |             |             | 0.23         |
| PHEL49_1250        | thioredoxin                                                                    | 11.28         |               |               |             |             |              |
| PHEL49_1254        | polyphosphate kinase 2                                                         | 103.68        | 155.14        | 97.51         | 0.67        | 0.63        | 1.06         |
| PHEL49_1255        | DNA polymerase III subunit epsilon                                             | 111.39        | 110.32        | 115.04        | 1.01        | 1.04        | 0.97         |
| PHEL49_1256        | conserved hypothetical protein                                                 | 14.25         |               |               |             |             |              |
| <b>PHEL49_1257</b> | <b>beta-N-acetylglucosaminidase, GH3 family / serine peptidase, S12 family</b> |               |               |               |             |             |              |
|                    |                                                                                |               |               |               |             |             | <b>23.07</b> |
| PHEL49_1261        | ribosomal RNA small subunit methyltransferase E                                |               |               | 23.11         |             |             |              |
| PHEL49_1262        | GTP cyclohydrolase                                                             |               | 5.01          | 12.16         |             | 2.42        |              |
| PHEL49_1265        | conserved hypothetical protein                                                 | 125.74        | 157.60        | 89.15         | 0.80        | 0.57        | 1.41         |
| PHEL49_1266        | conserved hypothetical membrane protein                                        | 5.15          | 2.40          | 5.81          | 2.15        | 2.42        | 0.89         |
| <b>PHEL49_1269</b> | <b>glycosyltransferase, GT4 family</b>                                         |               |               |               |             |             | <b>3.71</b>  |
| PHEL49_1270        | polysaccharide biosynthesis protein                                            | 2.38          |               |               |             |             |              |
| PHEL49_1274        | signal peptidase I                                                             | 23.60         | 28.42         | 13.51         | 0.83        | 0.48        | 1.75         |
| PHEL49_1275        | dihydrodipicolinate reductase                                                  | 36.46         | 16.97         | 44.58         | 2.15        | 2.63        | 0.82         |
| PHEL49_1276        | conserved hypothetical protein                                                 | 12.90         |               | 12.74         |             |             | 1.01         |
| PHEL49_1277        | chromosome (plasmid) partitioning protein ParB                                 | 65.66         | 147.09        | 78.35         | 0.45        | 0.53        | 0.84         |
| PHEL49_1278        | chromosome (plasmid) partitioning protein ParA                                 | 50.78         | 118.20        | 85.97         | 0.43        | 0.73        | 0.59         |
| PHEL49_1279        | aminoacyl-histidine dipeptidase (peptidase D)                                  | 10.03         | 14.30         | 29.72         | 0.70        | 2.08        | 0.34         |
| PHEL49_1280        | nitroreductase family protein                                                  | 42.32         | 45.97         |               | 0.92        |             |              |
| PHEL49_1282        | conserved hypothetical protein                                                 | 42.23         | 79.48         | 46.01         | 0.53        | 0.58        | 0.92         |
| PHEL49_1283        | branched-chain alpha-keto acid dehydrogenase, E1 component, alpha/beta subunit | 22.57         | 10.68         | 10.54         | 2.11        | 0.99        | 2.14         |
| PHEL49_1284        | aminopeptidase N                                                               | 1.23          |               |               |             |             |              |
| PHEL49_1285        | conserved hypothetical protein containing possible lysine decarboxylase motif  | 102.82        | 122.58        | 115.57        | 0.84        | 0.94        | 0.89         |
| PHEL49_1286        | excinuclease ABC subunit A                                                     | 9.03          | 14.71         | 7.64          | 0.61        | 0.52        | 1.18         |
| PHEL49_1288        | potassium channel protein                                                      | 3.87          |               | 7.64          |             |             | 0.51         |
| PHEL49_1289        | Na(+)-linked D-alanine glycine permease                                        | 73.65         | 36.77         | 28.15         | 2.00        | 0.77        | 2.62         |
| PHEL49_1291        | butyryl-CoA dehydrogenase                                                      | 47.70         | 22.57         | 81.05         | 2.11        | 3.59        | 0.59         |
| PHEL49_1295        | ribosomal subunit interface protein                                            | 299.04        |               |               |             |             |              |
| PHEL49_1300        | translation elongation factor Tu                                               | 1288.03       | 2039.65       | 1331.07       | 0.63        | 0.65        | 0.97         |
| PHEL49_1303        | transcription antitermination protein NusG                                     | 365.62        | 231.67        | 258.54        | 1.58        | 1.12        | 1.41         |
| PHEL49_1304        | LSU ribosomal protein L11p (L12e)                                              | 591.32        | 235.35        | 344.72        | 2.51        | 1.46        | 1.72         |
| PHEL49_1305        | LSU ribosomal protein L1p (L10Ae)                                              | 372.39        | 193.06        | 297.18        | 1.93        | 1.54        | 1.25         |
| PHEL49_1306        | LSU ribosomal protein L10p (P0)                                                | 894.46        | 632.89        | 581.84        | 1.41        | 0.92        | 1.54         |
| PHEL49_1307        | LSU ribosomal protein L7/L12 (P1/P2)                                           | 2041.66       | 1281.41       | 1488.17       | 1.59        | 1.16        | 1.37         |
| PHEL49_1308        | DNA-directed RNA polymerase beta subunit                                       | 522.25        | 638.78        | 250.00        | 0.82        | 0.39        | 2.09         |



|                    |                                                                                                      |             |              |              |             |             |             |
|--------------------|------------------------------------------------------------------------------------------------------|-------------|--------------|--------------|-------------|-------------|-------------|
| PHEL49_1310        | DNA-directed RNA polymerase beta subunit                                                             | 530.95      | 607.46       | 235.86       | 0.87        | 0.39        | 2.25        |
| PHEL49_1314        | chorismate synthase                                                                                  | 51.67       | 14.52        | 23.46        | 3.56        | 1.62        | 2.20        |
| PHEL49_1317        | response regulator receiver and SARP domain-containing protein                                       | 14.90       | 17.65        | 14.26        | 0.84        | 0.81        | 1.04        |
| <b>PHEL49_1323</b> | <b>sulfatase (S1-51) / glycoside hydrolase (GH99)</b>                                                | <b>1.33</b> |              |              |             |             |             |
| <b>PHEL49_1332</b> | <b>sulfatase, S1-15 family</b>                                                                       |             | <b>4.01</b>  |              |             |             |             |
| <b>PHEL49_1334</b> | <b>sulfatase, S1-51 family</b>                                                                       |             | <b>5.61</b>  |              |             |             |             |
| <b>PHEL49_1337</b> | <b>mannose-6-phosphate isomerase</b>                                                                 |             |              | <b>4.82</b>  |             |             |             |
| PHEL49_1347        | 2-dehydro-3-deoxyphosphogluconate aldolase / 4-hydroxy-2-oxoglutarate aldolase                       | 10.83       |              |              |             |             |             |
| PHEL49_1348        | 2-dehydro-3-deoxygluconate kinase                                                                    | 3.56        |              |              |             |             |             |
| PHEL49_1351        | aldehyde dehydrogenase                                                                               | 3.76        |              |              |             |             |             |
| PHEL49_1361        | glycerophosphoryl diester phosphodiesterase                                                          | 4.84        |              |              |             |             |             |
| PHEL49_1363        | protein containing pectin lyase domain                                                               | 7.65        | 12.47        |              | 0.61        |             |             |
| <b>PHEL49_1373</b> | <b>endo-1,3(4)-beta-glucanase, GH16 family</b>                                                       |             |              | <b>40.21</b> |             |             |             |
| PHEL49_1377        | conserved hypothetical protein (DUF4287)                                                             | 93.50       |              |              |             |             |             |
| PHEL49_1380        | ribosomal large subunit pseudouridine synthase F                                                     | 17.92       |              | 13.11        |             |             | 1.37        |
| PHEL49_1385        | conserved hypothetical protein                                                                       | 12.31       | 14.04        | 6.48         | 0.88        | 0.46        | 1.90        |
| PHEL49_1386        | oxidoreductase alpha (molybdopterin) subunit                                                         |             |              | 2.10         |             |             |             |
| PHEL49_1389        | conserved hypothetical membrane protein (DUF20)                                                      | 5.08        |              |              |             |             |             |
| PHEL49_1390        | conserved hypothetical protein                                                                       |             |              | 3.64         |             |             |             |
| PHEL49_1394        | gamma-glutamyltranspeptidase                                                                         | 87.37       | 76.51        | 94.90        | 1.14        | 1.24        | 0.92        |
| PHEL49_1397        | DNA polymerase III subunit beta                                                                      | 166.79      | 312.13       | 223.97       | 0.53        | 0.72        | 0.74        |
| <b>PHEL49_1398</b> | <b>carbohydrate esterase, CE14 family</b>                                                            | <b>5.76</b> | <b>17.60</b> | <b>6.64</b>  | <b>0.33</b> | <b>0.38</b> | <b>0.87</b> |
| PHEL49_1399        | sodium iodide symporter                                                                              | 1.91        |              |              |             |             |             |
| PHEL49_1401        | conserved hypothetical protein (DUF2911)                                                             | 336.55      | 992.88       | 631.94       | 0.34        | 0.64        | 0.53        |
| PHEL49_1403        | dTDP-glucose 4,6-dehydratase                                                                         |             |              | 12.30        |             |             |             |
| PHEL49_1404        | gliding motility protein GldG                                                                        | 1.50        | 4.90         | 1.98         | 0.31        | 0.40        | 0.76        |
| PHEL49_1408        | S-adenosyl-L-methionine hydroxide adenosyltransferase                                                | 12.70       | 13.79        | 13.93        | 0.92        | 1.01        | 0.91        |
| PHEL49_1409        | phosphate starvation-inducible protein PhoH                                                          | 20.69       | 58.22        | 52.01        | 0.36        | 0.89        | 0.40        |
| PHEL49_1411        | phosphoribosylaminoimidazole-succinocarboxamide synthase                                             | 61.73       | 38.94        | 68.18        | 1.59        | 1.75        | 0.91        |
| PHEL49_1413        | glyoxylase family protein                                                                            | 53.20       |              |              |             |             |             |
| PHEL49_1417        | Na <sup>+</sup> /solute symporter                                                                    | 2.22        |              |              |             |             |             |
| PHEL49_1418        | acetyl-CoA synthetase                                                                                |             |              | 3.71         |             |             |             |
| PHEL49_1420        | lipid A export ATP-binding/permease protein MsbA                                                     | 2.08        | 42.43        | 15.09        | 0.05        | 0.36        | 0.14        |
| PHEL49_1421        | conserved hypothetical protein                                                                       |             | 30.43        | 9.22         |             | 0.30        |             |
| PHEL49_1423        | endoglucanase                                                                                        | 204.82      | 711.57       | 474.74       | 0.29        | 0.67        | 0.43        |
| PHEL49_1424        | ABC transporter, ATP-binding protein                                                                 | 65.66       | 70.20        | 83.75        | 0.94        | 1.19        | 0.78        |
| PHEL49_1425        | conserved hypothetical membrane protein containing ABC-2 family transporter and peptidase MA domains | 5.85        | 4.76         |              | 1.23        |             |             |
| PHEL49_1427        | conserved hypothetical protein containing esterase-like activity of phytase domain                   | 4.95        |              | 4.35         |             |             | 1.14        |
| PHEL49_1429        | dihydrodipicolinate synthase                                                                         | 32.83       | 20.06        | 56.73        | 1.64        | 2.83        | 0.58        |

|                    |                                                                                       |             |             |              |             |             |             |
|--------------------|---------------------------------------------------------------------------------------|-------------|-------------|--------------|-------------|-------------|-------------|
| PHEL49_1430        | ferritin 1                                                                            | 388.43      | 63.87       | 98.54        | 6.08        | 1.54        | 3.94        |
| PHEL49_1431        | lipoprotein                                                                           | 67.71       | 198.58      | 99.34        | 0.34        | 0.50        | 0.68        |
| PHEL49_1432        | RNA polymerase Rpb6                                                                   | 11.28       |             |              |             |             |             |
| PHEL49_1433        | phosphopantothenoylcysteine decarboxylase / phosphopantothenoylcysteine synthetase    | 32.32       | 47.64       | 10.13        | 0.68        | 0.21        | 3.19        |
| PHEL49_1434        | conserved hypothetical protein                                                        | 37.84       | 22.71       | 39.33        | 1.67        | 1.73        | 0.96        |
| PHEL49_1435        | DNA repair protein RecN                                                               | 7.64        | 17.79       | 11.50        | 0.43        | 0.65        | 0.66        |
| PHEL49_1436        | enoyl-(acyl-carrier-protein) reductase [NADH]                                         | 516.84      | 393.48      | 451.71       | 1.31        | 1.15        | 1.14        |
| PHEL49_1440        | copper homeostasis protein CutC                                                       | 39.06       | 8.49        | 6.86         | 4.60        | 0.81        | 5.70        |
| PHEL49_1446        | inner membrane protein translocase component YidC                                     | 20.69       | 38.31       | 29.72        | 0.54        | 0.78        | 0.70        |
| PHEL49_1447        | CTP synthase                                                                          | 48.52       | 40.45       | 49.03        | 1.20        | 1.21        | 0.99        |
| PHEL49_1449        | carbamoyl-phosphate synthase large chain                                              | 100.92      | 56.20       | 84.95        | 1.80        | 1.51        | 1.19        |
| PHEL49_1450        | conserved hypothetical protein                                                        | 9.67        |             | 25.47        |             |             | 0.38        |
| PHEL49_1453        | two-component system response regulator                                               | 8.26        | 8.07        | 8.70         | 1.02        | 1.08        | 0.95        |
| PHEL49_1456        | Ycel-like domain protein                                                              | 57.55       |             |              |             |             |             |
| PHEL49_1457        | conserved hypothetical protein                                                        |             |             | 11.14        |             |             |             |
| PHEL49_1460        | glucose-1-phosphate thymidyltransferase                                               | 53.86       | 107.81      | 89.15        | 0.50        | 0.83        | 0.60        |
| PHEL49_1462        | conserved hypothetical protein (DUF2807)                                              | 65.10       | 178.21      | 106.30       | 0.37        | 0.60        | 0.61        |
| PHEL49_1463        | conserved hypothetical protein                                                        | 11.56       | 88.79       | 21.74        | 0.13        | 0.24        | 0.53        |
| PHEL49_1466        | conserved hypothetical protein (DUF4380)                                              |             |             | 4.95         |             |             |             |
| PHEL49_1468        | ATP-dependent protease La                                                             | 28.59       | 240.25      | 58.44        | 0.12        | 0.24        | 0.49        |
| PHEL49_1469        | nucleoside triphosphate pyrophosphohydrolase MazG                                     | 13.54       | 7.35        | 20.80        | 1.84        | 2.83        | 0.65        |
| PHEL49_1470        | conserved hypothetical protein                                                        | 93.10       |             | 50.15        |             |             | 1.86        |
| PHEL49_1471        | peptide deformylase                                                                   | 44.16       |             | 58.14        |             |             | 0.76        |
| PHEL49_1473        | 2,3,4,5-tetrahydropyridine-2,6-dicarboxylate N-succinyltransferase                    | 65.45       | 77.22       | 124.81       | 0.85        | 1.62        | 0.52        |
| <b>PHEL49_1474</b> | <b>lipopolysaccharide core biosynthesis glycosyltransferase, GT2 family</b>           | <b>9.34</b> | <b>7.61</b> | <b>55.34</b> | <b>1.23</b> | <b>7.27</b> | <b>0.17</b> |
| <b>PHEL49_1477</b> | <b>sulfatase</b>                                                                      | <b>7.03</b> |             | <b>2.32</b>  |             |             | <b>3.04</b> |
| PHEL49_1480        | lipid A export ATP-binding/permease protein MsbA                                      | 17.92       | 4.87        | 26.22        | 3.68        | 5.39        | 0.68        |
| PHEL49_1481        | phosphoglucomutase                                                                    | 41.91       | 52.53       | 130.19       | 0.80        | 2.48        | 0.32        |
| <b>PHEL49_1482</b> | <b>undecaprenyl-phosphate 4-deoxy-4-formamido-L-arabinose transferase, GT2 family</b> |             |             | <b>4.82</b>  |             |             |             |
| PHEL49_1483        | LSU ribosomal protein L31 type B                                                      | 167.49      | 69.68       | 197.07       | 2.40        | 2.83        | 0.85        |
| PHEL49_1484        | oxidoreductase, short chain dehydrogenase/reductase family                            |             |             | 14.86        |             |             |             |
| PHEL49_1485        | conserved hypothetical protein                                                        | 3.39        | 33.10       | 8.92         | 0.10        | 0.27        | 0.38        |
| PHEL49_1486        | transaldolase                                                                         | 500.45      | 589.97      | 658.96       | 0.85        | 1.12        | 0.76        |
| PHEL49_1487        | 2-succinyl-5-enolpyruvyl-6-hydroxy-3-cyclohexene-1-carboxylic-acid synthase           |             |             | 2.83         |             |             |             |
| PHEL49_1488        | RNA binding S1 protein                                                                | 35.64       |             | 18.77        |             |             | 1.90        |
| PHEL49_1489        | esterase                                                                              | 10.77       | 15.04       |              | 0.72        |             |             |
| PHEL49_1490        | naphthoate synthase                                                                   | 69.89       | 71.17       | 126.54       | 0.98        | 1.78        | 0.55        |
| PHEL49_1491        | formyltetrahydrofolate deformylase                                                    |             |             | 10.81        |             |             |             |
| PHEL49_1492        | fumarylacetoacetate hydrolase family protein                                          | 58.88       | 57.56       | 73.65        | 1.02        | 1.28        | 0.80        |

|             |                                                             |        |        |        |      |      |      |
|-------------|-------------------------------------------------------------|--------|--------|--------|------|------|------|
| PHEL49_1493 | competence/damage-inducible protein CinA-like protein       | 10.30  | 9.59   | 17.44  | 1.07 | 1.82 | 0.59 |
| PHEL49_1494 | LSU ribosomal protein L28p                                  | 90.28  |        | 89.15  |      |      | 1.01 |
| PHEL49_1496 | conserved hypothetical protein (DUF4295)                    | 22.57  |        |        |      |      |      |
| PHEL49_1498 | signal recognition particle-docking protein FtsY            | 43.26  | 70.48  | 27.24  | 0.61 | 0.39 | 1.59 |
| PHEL49_1503 | phosphomannomutase / phosphoglucosamine mutase              | 48.75  | 44.13  | 64.19  | 1.10 | 1.45 | 0.76 |
| PHEL49_1504 | conserved hypothetical protein                              |        | 10.34  | 19.50  |      | 1.89 |      |
| PHEL49_1505 | cysteine desulfurase                                        | 8.62   | 4.01   | 9.73   | 2.15 | 2.42 | 0.89 |
| PHEL49_1506 | lipid A biosynthesis lauroyl acyltransferase                | 3.66   |        | 19.28  |      |      | 0.19 |
| PHEL49_1509 | peptidyl-prolyl cis-trans isomerase                         | 104.64 | 123.69 | 121.57 | 0.85 | 0.98 | 0.86 |
| PHEL49_1510 | conserved hypothetical protein                              | 8.32   |        | 10.95  |      |      | 0.76 |
| PHEL49_1511 | peptide chain release factor 3                              | 6.77   | 3.68   |        | 1.84 |      |      |
| PHEL49_1513 | isopentenyl-diphosphate delta-isomerase                     | 32.24  | 31.52  | 8.49   | 1.02 | 0.27 | 3.80 |
| PHEL49_1514 | 6-pyruvoyl tetrahydrobiopterin synthase                     | 8.46   |        |        |      |      |      |
| PHEL49_1518 | mannose-6-phosphate isomerase                               | 3.66   | 38.76  | 31.32  | 0.09 | 0.81 | 0.12 |
| PHEL49_1519 | 3-deoxy-manno-octulosonate cytidyltransferase               | 19.35  | 23.64  | 25.47  | 0.82 | 1.08 | 0.76 |
| PHEL49_1520 | haloacid dehalogenase-like hydrolase                        | 17.55  | 8.17   | 6.60   | 2.15 | 0.81 | 2.66 |
| PHEL49_1523 | conserved hypothetical protein                              |        | 23.64  |        |      |      |      |
| PHEL49_1526 | conserved hypothetical protein                              | 110.03 | 354.60 | 159.20 | 0.31 | 0.45 | 0.69 |
| PHEL49_1528 | conserved hypothetical protein                              | 111.23 |        | 50.94  |      |      | 2.18 |
| PHEL49_1534 | conserved hypothetical protein (DUF4870)                    | 33.85  |        |        |      |      |      |
| PHEL49_1535 | dihydroorotase                                              | 14.72  | 31.18  | 34.89  | 0.47 | 1.12 | 0.42 |
| PHEL49_1537 | serine carboxypeptidase                                     | 30.88  | 11.61  | 17.20  | 2.66 | 1.48 | 1.80 |
| PHEL49_1539 | lipoprotein-releasing system ATP-binding protein LolD       | 5.42   |        | 14.26  |      |      | 0.38 |
| PHEL49_1541 | succinyl-CoA ligase (ADP-forming) subunit beta              | 168.48 | 274.52 | 265.39 | 0.61 | 0.97 | 0.63 |
| PHEL49_1544 | excinuclease ABC subunit B                                  | 6.24   | 2.90   | 8.21   | 2.15 | 2.83 | 0.76 |
| PHEL49_1545 | conserved hypothetical protein                              | 55.29  | 62.01  | 31.65  | 0.89 | 0.51 | 1.75 |
| PHEL49_1546 | excinuclease ABC subunit B                                  |        | 44.82  |        |      |      |      |
| PHEL49_1547 | ABC transporter, ATP-binding protein                        | 28.72  | 113.66 | 45.93  | 0.25 | 0.40 | 0.63 |
| PHEL49_1548 | plasmid pRiA4b, Orf3-like protein                           | 14.25  |        | 46.92  |      |      | 0.30 |
| PHEL49_1549 | thioesterase superfamily protein                            | 12.70  |        |        |      |      |      |
| PHEL49_1551 | conserved hypothetical protein (DUF3276)                    | 952.75 | 575.24 | 630.44 | 1.66 | 1.10 | 1.51 |
| PHEL49_1552 | ABC multidrug transporter, ATP-binding and permease protein | 5.13   |        | 6.75   |      |      | 0.76 |
| PHEL49_1553 | NusB family protein                                         | 29.02  | 12.61  | 33.11  | 2.30 | 2.63 | 0.88 |
| PHEL49_1554 | conserved hypothetical protein (DUF1573)                    | 342.52 | 707.35 | 902.02 | 0.48 | 1.28 | 0.38 |
| PHEL49_1555 | preprotein translocase subunit YajC (TC 3.A.5.1.1)          | 677.08 | 376.93 | 631.50 | 1.80 | 1.68 | 1.07 |
| PHEL49_1556 | conserved hypothetical protein                              |        |        | 4.95   |      |      |      |
| PHEL49_1558 | two-component system sensor histidine kinase                | 4.51   | 12.87  | 5.94   | 0.35 | 0.46 | 0.76 |
| PHEL49_1559 | two-component system response regulator                     | 273.34 | 935.68 | 194.82 | 0.29 | 0.21 | 1.40 |
| PHEL49_1560 | Sua5/YciO/YrdC/YwIC family protein                          | 64.76  |        | 7.75   |      |      | 8.35 |
| PHEL49_1562 | type I restriction enzyme R protein                         | 9.03   |        |        |      |      |      |
| PHEL49_1563 | DNA polymerase III subunit delta                            | 10.42  | 14.14  | 20.57  | 0.74 | 1.45 | 0.51 |
| PHEL49_1564 | long-chain fatty-acid-CoA ligase                            | 42.82  | 43.80  | 36.71  | 0.98 | 0.84 | 1.17 |

|                    |                                                                                                                                                   |              |              |              |             |             |             |
|--------------------|---------------------------------------------------------------------------------------------------------------------------------------------------|--------------|--------------|--------------|-------------|-------------|-------------|
| PHEL49_1565        | long-chain fatty-acid-CoA ligase                                                                                                                  | 8.08         | 11.53        | 14.64        | 0.70        | 1.27        | 0.55        |
| PHEL49_1566        | conserved hypothetical protein containing pentapeptide repeats                                                                                    | 26.21        | 352.31       | 227.20       | 0.07        | 0.64        | 0.12        |
| PHEL49_1569        | phosphoribosylformylglycinamide synthase, synthetase subunit /<br>phosphoribosylformylglycinamide synthase, glutamine amidotransferase<br>subunit | 81.65        | 134.66       | 51.13        | 0.61        | 0.38        | 1.60        |
| PHEL49_1570        | cytochrome c peroxidase                                                                                                                           | 14.32        | 6.36         | 3.43         | 2.25        | 0.54        | 4.18        |
| PHEL49_1571        | endonuclease I                                                                                                                                    | 27.45        | 47.71        | 8.43         | 0.58        | 0.18        | 3.25        |
| PHEL49_1572        | endonuclease I                                                                                                                                    | 42.32        | 41.37        | 10.03        | 1.02        | 0.24        | 4.22        |
| PHEL49_1573        | tRNA and rRNA cytosine-C5-methylase                                                                                                               | 20.61        | 19.19        | 27.13        | 1.07        | 1.41        | 0.76        |
| PHEL49_1576        | CDP-alcohol phosphatidyltransferase                                                                                                               | 14.01        |              | 9.22         |             |             | 1.52        |
| <b>PHEL49_1579</b> | <b>glycoside hydrolase, GHnc family</b>                                                                                                           | <b>22.18</b> | <b>38.99</b> | <b>24.59</b> | <b>0.57</b> | <b>0.63</b> | <b>0.90</b> |
| <b>PHEL49_1580</b> | <b>glycoside hydrolase, GHnc family</b>                                                                                                           | <b>5.25</b>  |              | <b>4.61</b>  |             |             | <b>1.14</b> |
| PHEL49_1583        | ArgK protein                                                                                                                                      | 19.10        | 22.63        | 34.29        | 0.84        | 1.52        | 0.56        |
| PHEL49_1584        | cysteinyl-tRNA synthetase                                                                                                                         | 14.51        | 84.71        | 71.64        | 0.17        | 0.85        | 0.20        |
| PHEL49_1586        | prolipoprotein diacylglycerol transferase                                                                                                         |              |              | 7.87         |             |             |             |
| PHEL49_1588        | conserved hypothetical protein                                                                                                                    |              | 20.06        |              |             |             |             |
| PHEL49_1590        | acyltransferase                                                                                                                                   |              |              | 11.50        |             |             |             |
| PHEL49_1591        | Zn-dependent aminopeptidase, MA superfamily                                                                                                       | 70.13        | 101.13       | 142.22       | 0.69        | 1.41        | 0.49        |
| PHEL49_1592        | Zn-dependent aminopeptidase, MA superfamily                                                                                                       | 19.23        | 36.77        | 19.81        | 0.52        | 0.54        | 0.97        |
| PHEL49_1594        | conserved hypothetical protein (DUF4480)                                                                                                          |              | 14.23        |              |             |             |             |
| PHEL49_1597        | peptidase S51 family                                                                                                                              | 5.21         |              | 6.86         |             |             | 0.76        |
| PHEL49_1598        | 3,4-dihydroxy-2-butanone 4-phosphate synthase / GTP cyclohydrolase II                                                                             | 43.53        | 86.68        | 76.42        | 0.50        | 0.88        | 0.57        |
| PHEL49_1600        | conserved hypothetical protein                                                                                                                    | 43.33        |              | 42.79        |             |             | 1.01        |
| PHEL49_1601        | cell division protein FtsK                                                                                                                        | 19.60        | 4.35         | 14.08        | 4.50        | 3.23        | 1.39        |
| PHEL49_1603        | thiol peroxidase, Tpx-type                                                                                                                        | 11.28        |              | 34.67        |             |             | 0.33        |
| PHEL49_1606        | aminopeptidase, M28 family                                                                                                                        | 99.87        | 157.21       | 104.75       | 0.64        | 0.67        | 0.95        |
| PHEL49_1609        | nucleoside 5-triphosphatase RdgB                                                                                                                  | 18.47        |              |              |             |             |             |
| PHEL49_1611        | quinolate phosphoribosyltransferase                                                                                                               | 24.03        | 32.03        | 14.38        | 0.75        | 0.45        | 1.67        |
| PHEL49_1612        | McbG protein                                                                                                                                      | 33.85        | 55.16        | 28.37        | 0.61        | 0.51        | 1.19        |
| PHEL49_1615        | histidyl-tRNA synthetase                                                                                                                          | 54.43        | 54.08        | 54.19        | 1.01        | 1.00        | 1.00        |
| PHEL49_1616        | GTP cyclohydrolase I                                                                                                                              | 117.19       | 12.73        | 137.16       | 9.21        | 10.78       | 0.85        |
| <b>PHEL49_1617</b> | <b>hypothetical protein containing three putative carbohydrate binding<br/>modules, CBM61</b>                                                     |              |              | <b>19.63</b> |             |             |             |
| <b>PHEL49_1618</b> | <b>putative endo-1,3(4)-beta-glucanase, GH81 family</b>                                                                                           | <b>1.17</b>  | <b>4.46</b>  | <b>18.04</b> | <b>0.26</b> | <b>4.04</b> | <b>0.07</b> |
| PHEL49_1620        | preprotein translocase subunit SecA                                                                                                               | 84.24        | 348.33       | 100.38       | 0.24        | 0.29        | 0.84        |
| PHEL49_1622        | cobalamin adenosyltransferase                                                                                                                     | 21.54        | 65.19        | 137.78       | 0.33        | 2.11        | 0.16        |
| PHEL49_1629        | fumarate hydratase class II                                                                                                                       | 134.06       | 145.62       | 185.44       | 0.92        | 1.27        | 0.72        |
| PHEL49_1631        | TonB-dependent receptor, plug                                                                                                                     | 11.78        | 29.98        | 20.35        | 0.39        | 0.68        | 0.58        |
| PHEL49_1632        | arsenate reductase                                                                                                                                | 41.67        |              |              |             |             |             |
| PHEL49_1633        | peptide chain release factor 2                                                                                                                    | 17.73        | 26.27        | 14.86        | 0.68        | 0.57        | 1.19        |
| PHEL49_1634        | extracellular metal-dependent peptidase                                                                                                           | 51.34        | 58.19        | 36.25        | 0.88        | 0.62        | 1.42        |
| PHEL49_1635        | L-allo-threonine aldolase                                                                                                                         | 14.25        | 23.23        | 21.12        | 0.61        | 0.91        | 0.68        |

|                    |                                                   |              |             |              |             |             |             |
|--------------------|---------------------------------------------------|--------------|-------------|--------------|-------------|-------------|-------------|
| PHEL49_1637        | RNA polymerase sigma-70 factor                    | 28.51        |             |              |             |             |             |
| PHEL49_1638        | transcriptional regulator, MerR family            | 71.47        | 177.74      | 126.30       | 0.40        | 0.71        | 0.57        |
| PHEL49_1639        | phytoene dehydrogenase                            | 54.17        | 146.43      | 89.15        | 0.37        | 0.61        | 0.61        |
| PHEL49_1640        | phytoene synthase                                 |              |             | 27.02        |             |             |             |
| PHEL49_1642        | lycopene cyclase                                  |              | 17.16       | 3.96         |             | 0.23        |             |
| PHEL49_1643        | NADH:flavin oxidoreductase/NADH oxidase           | 9.03         |             | 17.83        |             |             | 0.51        |
| <b>PHEL49_1644</b> | <b>carbohydrate binding protein, CBM9 domain</b>  | <b>11.28</b> | <b>9.19</b> | <b>22.29</b> | <b>1.23</b> | <b>2.42</b> | <b>0.51</b> |
| PHEL49_1646        | argininosuccinate lyase                           |              | 9.19        | 35.29        |             | 3.84        |             |
| PHEL49_1648        | acetylglutamate kinase                            |              |             | 6.37         |             |             |             |
| PHEL49_1649        | ornithine carbamoyltransferase                    |              |             | 28.02        |             |             |             |
| PHEL49_1652        | acetylornithine aminotransferase                  |              | 5.38        | 4.35         |             | 0.81        |             |
| PHEL49_1653        | pyrroline-5-carboxylate reductase                 |              | 7.61        | 110.67       |             | 14.55       |             |
| PHEL49_1654        | N-acetyl-gamma-glutamyl-phosphate reductase       |              |             | 27.24        |             |             |             |
| PHEL49_1655        | argininosuccinate synthase                        | 3.08         | 17.55       | 60.79        | 0.18        | 3.46        | 0.05        |
| PHEL49_1658        | two-component system sensor histidine kinase      | 6.39         | 27.06       |              | 0.24        |             |             |
| PHEL49_1664        | two-component system response regulator           |              | 7.35        |              |             |             |             |
| PHEL49_1668        | SPFH domain / band 7 family protein               | 50.78        | 58.61       | 125.37       | 0.87        | 2.14        | 0.41        |
| PHEL49_1669        | endonuclease                                      | 78.99        | 257.41      | 115.90       | 0.31        | 0.45        | 0.68        |
| PHEL49_1670        | redoxin                                           |              |             | 13.37        |             |             |             |
| PHEL49_1671        | thioredoxin family protein                        | 32.38        | 91.13       | 42.64        | 0.36        | 0.47        | 0.76        |
| PHEL49_1675        | conserved hypothetical protein (DUF490)           | 6.57         |             |              |             |             |             |
| PHEL49_1676        | 6-phosphofructokinase                             | 21.91        | 45.43       | 86.53        | 0.48        | 1.90        | 0.25        |
| PHEL49_1677        | glyceraldehyde-3-phosphate dehydrogenase          | 278.36       | 637.41      | 1099.55      | 0.44        | 1.73        | 0.25        |
| PHEL49_1679        | conserved hypothetical protein                    |              | 9.73        | 4.37         |             | 0.45        |             |
| PHEL49_1681        | MCE family protein                                | 30.09        | 39.84       | 52.01        | 0.76        | 1.31        | 0.58        |
| PHEL49_1682        | iron-sulphur-binding reductase                    | 17.60        |             | 19.61        |             |             | 0.90        |
| PHEL49_1683        | iron-sulphur-binding reductase                    | 28.02        | 34.24       | 79.93        | 0.82        | 2.33        | 0.35        |
| PHEL49_1687        | conserved hypothetical protein                    | 33.85        |             | 35.66        |             |             | 0.95        |
| PHEL49_1688        | O-succinylbenzoate synthase                       | 17.36        | 22.63       | 11.43        | 0.77        | 0.51        | 1.52        |
| PHEL49_1689        | abortive infection protein                        | 5.64         |             |              |             |             |             |
| PHEL49_1690        | O-succinylbenzoic acid-CoA ligase                 | 5.21         | 5.66        |              | 0.92        |             |             |
| PHEL49_1691        | peptidoglycan-binding domain protein              | 33.85        | 12.73       | 51.43        | 2.66        | 4.04        | 0.66        |
| PHEL49_1692        | transcriptional regulator, Crp/Fnr family         |              |             | 7.75         |             |             |             |
| PHEL49_1697        | cytochrome c oxidase subunit CcoN/CcoO            | 1.63         |             |              |             |             |             |
| PHEL49_1704        | two-component system response regulator           | 90.28        | 93.98       | 59.44        | 0.96        | 0.63        | 1.52        |
| PHEL49_1709        | tRNA modification GTPase TrmE                     | 5.31         |             | 5.24         |             |             | 1.01        |
| PHEL49_1712        | tRNA-(MS[2]IO[6]A)-hydroxylase                    | 17.66        |             | 23.26        |             |             | 0.76        |
| PHEL49_1715        | sodium/hydrogen exchanger                         | 3.03         |             |              |             |             |             |
| PHEL49_1716        | DNA polymerase III subunit gamma/tau              | 2.12         |             | 4.18         |             |             | 0.51        |
| PHEL49_1717        | peptide methionine sulfoxide reductase MsrA       |              | 17.65       | 32.10        |             | 1.82        |             |
| PHEL49_1719        | outer membrane protein H precursor                | 60.94        | 99.29       | 44.58        | 0.61        | 0.45        | 1.37        |
| PHEL49_1723        | proline synthase co-transcribed bacterial homolog | 5.42         |             |              |             |             |             |

|             |                                                               |         |         |         |      |      |      |
|-------------|---------------------------------------------------------------|---------|---------|---------|------|------|------|
| PHEL49_1724 | D-3-phosphoglycerate dehydrogenase                            | 37.84   | 61.65   | 31.47   | 0.61 | 0.51 | 1.20 |
| PHEL49_1725 | phosphoserine aminotransferase                                | 13.54   | 38.61   | 15.60   | 0.35 | 0.40 | 0.87 |
| PHEL49_1726 | acyl-CoA reductase                                            | 11.56   | 40.36   | 45.66   | 0.29 | 1.13 | 0.25 |
| PHEL49_1728 | TonB-dependent receptor, plug                                 | 1692.03 | 1416.69 | 1486.47 | 1.19 | 1.05 | 1.14 |
| PHEL49_1729 | TonB-dependent receptor, plug                                 | 2.46    |         | 1.62    |      |      | 1.52 |
| PHEL49_1732 | GTP-binding protein YchF                                      | 13.54   | 13.79   | 17.83   | 0.98 | 1.29 | 0.76 |
| PHEL49_1733 | aminomethyltransferase                                        | 32.16   | 27.58   | 11.14   | 1.17 | 0.40 | 2.89 |
| PHEL49_1737 | DNA topoisomerase III                                         | 4.56    |         |         |      |      |      |
| PHEL49_1740 | diaminopimelate decarboxylase                                 |         |         | 11.38   |      |      |      |
| PHEL49_1741 | DNA topoisomerase IV subunit B                                | 26.70   | 24.86   | 21.35   | 1.07 | 0.86 | 1.25 |
| PHEL49_1742 | DNA topoisomerase IV subunit A                                | 10.32   | 7.35    |         | 1.40 |      |      |
| PHEL49_1745 | vitamin B12 ABC transporter, B12-binding component BtuF       | 3.15    |         |         |      |      |      |
| PHEL49_1746 | GMP reductase                                                 | 55.24   | 17.42   | 39.88   | 3.17 | 2.29 | 1.38 |
| PHEL49_1747 | TonB-dependent receptor, plug                                 | 63.95   | 102.66  | 229.07  | 0.62 | 2.23 | 0.28 |
| PHEL49_1749 | ATP-dependent DNA helicase UvrD/PcrA                          | 4.62    | 2.51    | 12.16   | 1.84 | 4.85 | 0.38 |
| PHEL49_1750 | conserved hypothetical protein (DUF4290)                      | 13.02   |         |         |      |      |      |
| PHEL49_1751 | UDP-N-acetylglucosamine 1-carboxyvinyltransferase             | 22.57   | 25.28   | 27.86   | 0.89 | 1.10 | 0.81 |
| PHEL49_1752 | GrpE nucleotide exchange factor                               | 132.19  | 409.76  | 237.74  | 0.32 | 0.58 | 0.56 |
| PHEL49_1753 | chaperone protein DnaJ                                        | 47.89   | 368.63  | 117.42  | 0.13 | 0.32 | 0.41 |
| PHEL49_1754 | aconitate hydratase                                           | 100.74  | 197.77  | 252.24  | 0.51 | 1.28 | 0.40 |
| PHEL49_1755 | hypothetical protein                                          | 133.00  | 74.86   | 57.31   | 1.78 | 0.77 | 2.32 |
| PHEL49_1757 | DNA mismatch repair protein MutS                              | 5.64    |         | 5.31    |      |      | 1.06 |
| PHEL49_1760 | ABC transporter, substrate binding protein, nitrate/sulfonate | 18.47   |         | 13.51   |      |      | 1.37 |
| PHEL49_1761 | purine nucleoside phosphorylase                               | 23.27   | 24.13   | 16.72   | 0.96 | 0.69 | 1.39 |
| PHEL49_1763 | oxidoreductase                                                | 24.45   | 18.39   | 61.91   | 1.33 | 3.37 | 0.39 |
| PHEL49_1765 | conserved hypothetical protein                                |         |         | 10.49   |      |      |      |
| PHEL49_1767 | RNA methyltransferase, TrmA family                            |         |         | 8.10    |      |      |      |
| PHEL49_1768 | ornithine aminotransferase                                    | 25.02   | 21.58   | 19.38   | 1.16 | 0.90 | 1.29 |
| PHEL49_1773 | protease II                                                   | 2.39    |         |         |      |      |      |
| PHEL49_1774 | cystathionine beta-synthase                                   | 18.30   | 53.67   | 45.78   | 0.34 | 0.85 | 0.40 |
| PHEL49_1775 | 8-amino-7-oxononanoate synthase                               | 85.37   | 95.93   | 60.08   | 0.89 | 0.63 | 1.42 |
| PHEL49_1780 | TonB-dependent receptor, plug                                 | 2.45    | 13.29   | 5.37    | 0.18 | 0.40 | 0.46 |
| PHEL49_1781 | inosine-5'-monophosphate dehydrogenase                        | 53.39   | 103.96  | 161.16  | 0.51 | 1.55 | 0.33 |
| PHEL49_1784 | cAMP-binding protein                                          | 6.16    |         | 16.21   |      |      | 0.38 |
| PHEL49_1786 | OstA family protein                                           |         |         | 8.36    |      |      |      |
| PHEL49_1790 | cytochrome c, class I                                         | 7.52    |         | 19.81   |      |      | 0.38 |
| PHEL49_1791 | adenylosuccinate synthetase                                   | 90.76   | 131.45  | 134.68  | 0.69 | 1.02 | 0.67 |
| PHEL49_1792 | ferric uptake regulation protein FUR                          | 15.05   |         |         |      |      |      |
| PHEL49_1793 | GTP pyrophosphokinase, RelA/SpoT family                       | 3.19    |         | 13.64   |      |      | 0.23 |
| PHEL49_1796 | polyphosphate glucokinase                                     | 42.63   | 77.63   | 52.83   | 0.55 | 0.68 | 0.81 |
| PHEL49_1797 | SpoU rRNA methylase family protein                            | 15.80   | 14.71   | 8.92    | 1.07 | 0.61 | 1.77 |
| PHEL49_1798 | conserved hypothetical protein                                | 6.30    |         | 2.07    |      |      | 3.04 |

|                    |                                                                                                            |             |              |              |             |             |             |
|--------------------|------------------------------------------------------------------------------------------------------------|-------------|--------------|--------------|-------------|-------------|-------------|
| PHEL49_1799        | amidohydrolase 1 family protein                                                                            | 95.08       | 117.36       | 92.95        | 0.81        | 0.79        | 1.02        |
| PHEL49_1800        | amidohydrolase 1 family protein                                                                            | 60.32       | 101.29       | 57.54        | 0.60        | 0.57        | 1.05        |
| PHEL49_1801        | conserved hypothetical protein (DUF3810)                                                                   |             | 5.25         |              |             |             |             |
| PHEL49_1802        | replicative DNA helicase                                                                                   | 3.63        |              | 6.37         |             |             | 0.57        |
| PHEL49_1803        | acylaminoacyl-peptidase                                                                                    | 5.35        | 4.35         | 4.69         | 1.23        | 1.08        | 1.14        |
| PHEL49_1805        | transketolase, N-terminal section                                                                          | 81.25       | 91.93        | 142.64       | 0.88        | 1.55        | 0.57        |
| <b>PHEL49_1806</b> | <b>glycosyltransferase, GT4 family</b>                                                                     | <b>6.45</b> | <b>47.28</b> | <b>19.10</b> | <b>0.14</b> | <b>0.40</b> | <b>0.34</b> |
| PHEL49_1807        | conserved hypothetical protein (DUF937)                                                                    | 74.16       |              |              |             |             |             |
| PHEL49_1808        | proton/glutamate symporter                                                                                 | 16.93       | 20.69        | 16.72        | 0.82        | 0.81        | 1.01        |
| PHEL49_1813        | ABC transporter, ATP-binding protein                                                                       | 36.46       | 131.54       | 85.72        | 0.28        | 0.65        | 0.43        |
| PHEL49_1814        | ABC transporter, permease protein                                                                          | 6.02        | 36.77        | 27.74        | 0.16        | 0.75        | 0.22        |
| PHEL49_1815        | ABC transporter, permease protein                                                                          | 3.01        | 26.97        | 5.94         | 0.11        | 0.22        | 0.51        |
| PHEL49_1816        | membrane fusion efflux protein                                                                             | 84.22       | 637.71       | 219.62       | 0.13        | 0.34        | 0.38        |
| PHEL49_1821        | DEAD/DEAH box helicase                                                                                     | 19.35       | 28.89        | 6.37         | 0.67        | 0.22        | 3.04        |
| PHEL49_1823        | peptidase, S41 family                                                                                      | 20.92       | 39.46        | 14.50        | 0.53        | 0.37        | 1.44        |
| PHEL49_1824        | MaoC-like dehydratase                                                                                      | 43.81       |              | 10.49        |             |             | 4.18        |
| PHEL49_1826        | cold shock protein CspG                                                                                    | 211.09      |              | 94.40        |             |             | 2.24        |
| PHEL49_1827        | 3-dehydroquinate synthase                                                                                  | 6.77        | 11.03        | 6.69         | 0.61        | 0.61        | 1.01        |
| PHEL49_1828        | proline dehydrogenase                                                                                      | 34.61       | 34.32        | 51.51        | 1.01        | 1.50        | 0.67        |
| PHEL49_1830        | GTP-binding protein TypA/BipA                                                                              | 25.65       | 25.07        | 48.63        | 1.02        | 1.94        | 0.53        |
| PHEL49_1834        | pyridoxal-dependent decarboxylase                                                                          | 10.42       | 4.24         | 3.43         | 2.45        | 0.81        | 3.04        |
| PHEL49_1836        | ATP phosphoribosyltransferase                                                                              | 10.92       | 35.59        | 69.02        | 0.31        | 1.94        | 0.16        |
| PHEL49_1837        | histidinol dehydrogenase                                                                                   |             | 7.19         |              |             |             |             |
| PHEL49_1838        | histidinol-phosphate aminotransferase                                                                      | 6.77        | 27.58        | 22.29        | 0.25        | 0.81        | 0.30        |
| PHEL49_1839        | histidinol-phosphatase / imidazole glycerol-phosphate dehydratase                                          |             | 10.26        | 8.29         |             | 0.81        |             |
| PHEL49_1841        | phosphoribosylformimino-5-aminoimidazole carboxamide ribotide isomerase                                    |             | 28.60        | 19.81        |             | 0.69        |             |
| PHEL49_1844        | phosphoribosyl-AMP cyclohydrolase / phosphoribosyl-ATP pyrophosphatase                                     | 17.66       |              | 15.50        |             |             | 1.14        |
| PHEL49_1847        | YiaAB two helix domain-containing protein                                                                  | 75.23       |              | 44.58        |             |             | 1.69        |
| PHEL49_1852        | conserved hypothetical protein                                                                             | 23.90       |              | 34.09        |             |             | 0.70        |
| PHEL49_1854        | cAMP-binding proteins - catabolite gene activator and regulatory subunit of cAMP-dependent protein kinases | 5.64        |              |              |             |             |             |
| PHEL49_1855        | DEAD/DEAH box helicase                                                                                     | 5.42        |              | 7.13         |             |             | 0.76        |
| PHEL49_1856        | ATP-dependent RNA helicase YqfR                                                                            | 5.53        |              | 10.92        |             |             | 0.51        |
| PHEL49_1859        | conserved hypothetical protein                                                                             | 2.56        |              | 16.82        |             |             | 0.15        |
| PHEL49_1860        | conserved hypothetical protein (DUF3897)                                                                   | 218.51      | 426.24       | 810.48       | 0.51        | 1.90        | 0.27        |
| PHEL49_1864        | small-conductance mechanosensitive channel                                                                 |             | 7.04         | 3.79         |             | 0.54        |             |
| PHEL49_1867        | spore coat protein CotH                                                                                    | 1.68        | 1.82         |              | 0.92        |             |             |
| PHEL49_1869        | ABC transporter, ATP-binding protein                                                                       |             | 79.43        | 17.83        |             | 0.22        |             |
| PHEL49_1870        | ABC transporter, permease protein                                                                          | 2.18        | 18.98        |              | 0.12        |             |             |
| PHEL49_1877        | TonB-dependent receptor, plug                                                                              |             |              | 6.48         |             |             |             |
| PHEL49_1885        | zinc-binding dehydrogenase                                                                                 | 89.67       | 47.71        | 74.70        | 1.88        | 1.57        | 1.20        |
| PHEL49_1886        | 2-oxoisovalerate dehydrogenase, E1 component, alpha and beta subunit                                       | 19.21       | 5.96         |              | 3.22        |             |             |

|                    |                                                                                                                                                          |              |              |              |             |             |             |
|--------------------|----------------------------------------------------------------------------------------------------------------------------------------------------------|--------------|--------------|--------------|-------------|-------------|-------------|
| PHEL49_1887        | transcriptional regulator, AsnC family                                                                                                                   | 579.28       | 858.05       | 416.05       | 0.68        | 0.48        | 1.39        |
| PHEL49_1888        | carboxypeptidase, M14 family                                                                                                                             | 11.56        | 16.14        | 13.05        | 0.72        | 0.81        | 0.89        |
| PHEL49_1892        | aminopeptidase, M1 family                                                                                                                                | 2.16         | 75.11        | 17.07        | 0.03        | 0.23        | 0.13        |
| PHEL49_1893        | conserved hypothetical protein (DUF4252)                                                                                                                 | 47.40        | 137.90       | 138.19       | 0.34        | 1.00        | 0.34        |
| PHEL49_1894        | conserved hypothetical protein (DUF4252)                                                                                                                 | 163.92       | 632.89       | 206.46       | 0.26        | 0.33        | 0.79        |
| PHEL49_1898        | carboxyl-terminal protease, S41 family                                                                                                                   | 18.47        | 12.03        | 24.31        | 1.53        | 2.02        | 0.76        |
| <b>PHEL49_1900</b> | <b>conserved hypothetical protein, sialidase domain, GH74 family</b>                                                                                     |              |              | <b>4.69</b>  |             |             |             |
| PHEL49_1901        | conserved hypothetical protein                                                                                                                           |              |              | 8.10         |             |             |             |
| PHEL49_1903        | acyltransferase                                                                                                                                          | 6.77         |              |              |             |             |             |
| PHEL49_1904        | DNA recombination protein RmuC                                                                                                                           | 28.59        | 31.87        | 25.76        | 0.90        | 0.81        | 1.11        |
| PHEL49_1907        | serine hydroxymethyltransferase                                                                                                                          | 145.72       | 235.03       | 277.15       | 0.62        | 1.18        | 0.53        |
| PHEL49_1908        | fumarylacetoacetase                                                                                                                                      | 63.48        | 195.36       | 122.59       | 0.32        | 0.63        | 0.52        |
| PHEL49_1910        | deoxyhypusine synthase                                                                                                                                   |              | 6.13         |              |             |             |             |
| PHEL49_1912        | agmatinase                                                                                                                                               | 7.74         | 28.37        | 28.02        | 0.27        | 0.99        | 0.28        |
| PHEL49_1913        | arginine decarboxylase, biosynthetic                                                                                                                     |              |              | 4.78         |             |             |             |
| PHEL49_1914        | ATP-dependent helicase                                                                                                                                   | 16.07        | 28.05        | 28.71        | 0.57        | 1.02        | 0.56        |
| PHEL49_1916        | ATP-dependent chaperone ClpB                                                                                                                             | 80.14        | 373.74       | 70.05        | 0.21        | 0.19        | 1.14        |
| PHEL49_1917        | phosphoglycerate mutase family protein                                                                                                                   | 7.13         |              |              |             |             |             |
| PHEL49_1921        | transketolase, C-terminal section                                                                                                                        | 107.54       | 77.87        | 141.60       | 1.38        | 1.82        | 0.76        |
| PHEL49_1922        | conserved hypothetical protein containing outer membrane protein beta-barrel domain                                                                      | 86.17        | 135.39       | 137.78       | 0.64        | 1.02        | 0.63        |
| PHEL49_1923        | FKBP-type peptidylprolyl isomerase                                                                                                                       | 16.93        | 110.32       |              | 0.15        |             |             |
| PHEL49_1924        | ribosome-associated heat shock protein implicated in the recycling of the 50S subunit (S4 paralog)                                                       | 13.54        |              |              |             |             |             |
| PHEL49_1925        | phosphoribosyltransferase                                                                                                                                | 14.25        | 29.03        | 18.77        | 0.49        | 0.65        | 0.76        |
| PHEL49_1930        | SPFH domain / band 7 family protein                                                                                                                      | 187.84       | 231.32       | 816.75       | 0.81        | 3.53        | 0.23        |
| PHEL49_1934        | 3-oxoacyl-(acyl-carrier protein) reductase                                                                                                               | 216.14       | 199.43       | 229.74       | 1.08        | 1.15        | 0.94        |
| PHEL49_1935        | succinyl-CoA synthetase subunit alpha                                                                                                                    | 236.98       | 250.06       | 383.36       | 0.95        | 1.53        | 0.62        |
| PHEL49_1936        | UDP-3-O-(3-hydroxymyristoyl) glucosamine N-acyltransferase                                                                                               | 16.41        |              | 8.10         |             |             | 2.03        |
| PHEL49_1937        | translation elongation factor P                                                                                                                          | 80.60        | 31.52        | 80.66        | 2.56        | 2.56        | 1.00        |
| PHEL49_1938        | UDP-N- acetylglucosamine O-acyltransferase                                                                                                               | 46.70        | 7.61         | 64.56        | 6.14        | 8.49        | 0.72        |
| <b>PHEL49_1939</b> | <b>bifunctional UDP-3-O-[3-hydroxymyristoyl] N-acetylglucosamine deacetylase / (3R)-hydroxymyristoyl-[acyl-carrier protein] dehydratase, CE11 family</b> | <b>26.04</b> | <b>84.86</b> | <b>80.58</b> | <b>0.31</b> | <b>0.95</b> | <b>0.32</b> |
| PHEL49_1940        | UDP-3-O-(3-hydroxymyristoyl) glucosamine N-acyltransferase                                                                                               | 27.45        |              | 16.87        |             |             | 1.63        |
| PHEL49_1941        | phosphohydrolase                                                                                                                                         | 14.11        | 6.90         | 3.71         | 2.05        | 0.54        | 3.80        |
| PHEL49_1943        | response regulator receiver protein                                                                                                                      | 10.16        | 57.00        | 28.23        | 0.18        | 0.50        | 0.36        |
| PHEL49_1945        | alanine dehydrogenase                                                                                                                                    | 9.23         | 7.52         | 4.05         | 1.23        | 0.54        | 2.28        |
| PHEL49_1949        | two-component system response regulator                                                                                                                  | 7.25         |              | 6.37         |             |             | 1.14        |
| PHEL49_1952        | fist c domain-containing protein                                                                                                                         | 19.60        | 23.23        | 4.69         | 0.84        | 0.20        | 4.18        |
| PHEL49_1953        | heme NO binding protein                                                                                                                                  | 16.93        |              |              |             |             |             |
| PHEL49_1956        | LSU ribosomal protein L9p                                                                                                                                | 507.81       | 41.37        | 156.02       | 12.27       | 3.77        | 3.25        |



|                    |                                                                         |              |             |              |             |             |             |
|--------------------|-------------------------------------------------------------------------|--------------|-------------|--------------|-------------|-------------|-------------|
| PHEL49_1957        | SSU ribosomal protein S18p                                              | 190.81       |             | 72.94        |             |             | 2.62        |
| PHEL49_1958        | SSU ribosomal protein S6p                                               | 677.08       | 84.86       | 260.60       | 7.98        | 3.07        | 2.60        |
| PHEL49_1961        | primosomal protein N'                                                   | 9.27         | 13.94       | 7.51         | 0.66        | 0.54        | 1.23        |
| PHEL49_1965        | RNA methylase UPF0020 family protein                                    | 2.94         | 4.80        | 17.44        | 0.61        | 3.64        | 0.17        |
| PHEL49_1968        | ATP-dependent DNA helicase RecQ                                         | 14.86        | 8.07        | 11.96        | 1.84        | 1.48        | 1.24        |
| PHEL49_1969        | sugar isomerase                                                         | 32.89        | 129.23      | 91.70        | 0.25        | 0.71        | 0.36        |
| PHEL49_1971        | carboxymuconolactone decarboxylase family protein                       | 31.25        |             |              |             |             |             |
| PHEL49_1972        | ABC transporter, ATP-binding protein                                    | 21.76        | 55.16       | 54.13        | 0.39        | 0.98        | 0.40        |
| PHEL49_1973        | GAF sensor signal transduction histidine kinase                         | 7.36         | 19.19       | 25.20        | 0.38        | 1.31        | 0.29        |
| PHEL49_1977        | conserved hypothetical membrane protein (DUF4105)                       | 2.94         |             | 3.88         |             |             | 0.76        |
| PHEL49_1978        | glutamate formiminotransferase                                          | 81.90        | 33.81       | 34.51        | 2.42        | 1.02        | 2.37        |
| PHEL49_1982        | phosphohydrolase                                                        | 59.67        | 80.40       | 90.66        | 0.74        | 1.13        | 0.66        |
| PHEL49_1984        | conserved hypothetical protein                                          | 12.31        |             |              |             |             |             |
| PHEL49_1986        | TonB-dependent receptor, plug                                           | 9.57         | 13.19       | 28.10        | 0.73        | 2.13        | 0.34        |
| PHEL49_1987        | thiol peroxidase, Bcp-type                                              | 278.80       | 246.60      | 199.28       | 1.13        | 0.81        | 1.40        |
| PHEL49_1990        | excinuclease ABC subunit A                                              | 7.74         | 43.08       | 18.68        | 0.18        | 0.43        | 0.41        |
| <b>PHEL49_1992</b> | <b>carbohydrate esterase, CE14 family</b>                               | <b>17.55</b> | <b>8.17</b> | <b>13.21</b> | <b>2.15</b> | <b>1.62</b> | <b>1.33</b> |
| PHEL49_1993        | Na <sup>+</sup> /sulfate symporter                                      |              |             | 10.65        |             |             |             |
| PHEL49_1995        | O-acetylhomoserine sulfhydrylase / O-succinylhomoserine sulfhydrylase   | 4.72         |             | 10.37        |             |             | 0.46        |
| PHEL49_1997        | 3-deoxy-D-manno-octulosonate 8-phosphate phosphatase                    | 20.31        | 22.06       | 31.20        | 0.92        | 1.41        | 0.65        |
| PHEL49_2000        | oxidoreductase, Gfo/Idh/MocA family                                     |              | 12.26       | 4.95         |             | 0.40        |             |
| PHEL49_2001        | 3-hydroxybutyryl-CoA dehydrogenase                                      | 76.17        | 79.29       | 103.08       | 0.96        | 1.30        | 0.74        |
| PHEL49_2003        | transcriptional regulator, LysR family                                  | 9.40         |             | 4.95         |             |             | 1.90        |
| PHEL49_2004        | ABC transporter, ATP-binding protein                                    | 20.75        | 10.68       | 30.20        | 1.94        | 2.83        | 0.69        |
| PHEL49_2005        | conserved hypothetical protein                                          | 2.51         | 16.34       | 19.81        | 0.15        | 1.21        | 0.13        |
| PHEL49_2006        | DEAD/DEAH box helicase                                                  | 13.14        | 3.29        | 10.65        | 3.99        | 3.23        | 1.23        |
| PHEL49_2008        | 5'-nucleotidase                                                         | 9.50         | 17.42       | 25.03        | 0.55        | 1.44        | 0.38        |
| PHEL49_2009        | hydroxymethylglutaryl-CoA lyase                                         | 4.23         |             | 11.14        |             |             | 0.38        |
| PHEL49_2013        | dihydroorotate dehydrogenase                                            | 17.36        |             | 20.57        |             |             | 0.84        |
| PHEL49_2014        | phenylalanyl-tRNA synthetase subunit beta                               | 28.27        | 41.22       | 48.01        | 0.69        | 1.16        | 0.59        |
| PHEL49_2016        | redoxin                                                                 |              |             | 5.69         |             |             |             |
| PHEL49_2018        | peptidyl-prolyl cis-trans isomerase                                     | 33.07        | 48.75       | 39.39        | 0.68        | 0.81        | 0.84        |
| PHEL49_2019        | FKBP-type peptidyl-prolyl isomerase                                     | 228.20       | 482.14      | 336.80       | 0.47        | 0.70        | 0.68        |
| PHEL49_2021        | DHH family protein                                                      | 5.21         | 25.46       | 16.00        | 0.20        | 0.63        | 0.33        |
| PHEL49_2022        | nucleoside diphosphate kinase                                           | 112.85       | 58.84       | 77.27        | 1.92        | 1.31        | 1.46        |
| PHEL49_2023        | conserved hypothetical protein                                          | 12.09        | 7.88        | 25.47        | 1.53        | 3.23        | 0.47        |
| PHEL49_2024        | peptidase C45 acyl-coenzyme A:6-aminopenicillanic acid acyl-transferase | 22.57        | 31.87       | 37.64        | 0.71        | 1.18        | 0.60        |
| PHEL49_2025        | hypothetical protein                                                    |              |             | 5.94         |             |             |             |
| PHEL49_2029        | DNA recombination and repair protein RecF                               |              | 10.76       | 19.57        |             | 1.82        |             |
| PHEL49_2030        | TPR domain protein                                                      | 99.14        | 66.98       | 114.63       | 1.48        | 1.71        | 0.86        |
| PHEL49_2033        | DNA mismatch repair protein MutL                                        | 1.99         | 97.34       | 38.02        | 0.02        | 0.39        | 0.05        |
| PHEL49_2045        | 2-nitropropane dioxygenase                                              | 17.92        |             |              |             |             |             |

|                    |                                                                                              |               |               |               |             |              |             |
|--------------------|----------------------------------------------------------------------------------------------|---------------|---------------|---------------|-------------|--------------|-------------|
| PHEL49_2047        | tRNA (5-methylaminomethy-2-thiouridylate)-methyltransferase                                  | 4.51          |               |               |             |              |             |
| PHEL49_2050        | adenylosuccinate lyase                                                                       | 65.05         | 112.48        | 134.60        | 0.58        | 1.20         | 0.48        |
| PHEL49_2051        | conserved hypothetical protein                                                               | 43.53         |               | 70.05         |             |              | 0.62        |
| PHEL49_2053        | TonB-dependent receptor, plug                                                                | 1.49          | 3.64          | 8.82          | 0.41        | 2.42         | 0.17        |
| PHEL49_2057        | peptidase, M48 family                                                                        | 9.03          |               | 29.72         |             |              | 0.30        |
| PHEL49_2061        | signal recognition 54 kDa protein (SRP54)                                                    | 57.83         | 87.34         | 72.44         | 0.66        | 0.83         | 0.80        |
| PHEL49_2062        | methylenetetrahydrofolate dehydrogenase (NADP+) /<br>methenyltetrahydrofolate cyclohydrolase | 88.87         | 162.03        | 128.16        | 0.55        | 0.79         | 0.69        |
| PHEL49_2064        | conserved hypothetical protein                                                               | 125.74        | 84.05         | 169.81        | 1.50        | 2.02         | 0.74        |
| PHEL49_2065        | conserved hypothetical protein (DUF853)                                                      | 32.07         | 38.71         | 39.10         | 0.83        | 1.01         | 0.82        |
| <b>PHEL49_2066</b> | <b>glycoside hydrolase, GHnc family</b>                                                      | <b>55.29</b>  | <b>215.12</b> | <b>60.18</b>  | <b>0.26</b> | <b>0.28</b>  | <b>0.92</b> |
| PHEL49_2067        | conserved hypothetical protein (DUF2490)                                                     | 29.02         | 21.01         | 33.96         | 1.38        | 1.62         | 0.85        |
| PHEL49_2069        | conserved hypothetical protein (DUF4369)                                                     | 22.57         | 8.17          | 52.83         | 2.76        | 6.47         | 0.43        |
| PHEL49_2070        | conserved hypothetical protein (DUF255)                                                      | 5.85          | 2.72          | 17.61         | 2.15        | 6.47         | 0.33        |
| <b>PHEL49_2071</b> | <b>carbohydrate binding protein, CBM4 domain</b>                                             | <b>208.89</b> | <b>68.07</b>  | <b>24.66</b>  | <b>3.07</b> | <b>0.36</b>  | <b>8.47</b> |
| PHEL49_2075        | MFS/sugar transport protein                                                                  | 3.69          |               | 9.73          |             |              | 0.38        |
| <b>PHEL49_2076</b> | <b>glucosylceramidase, GH30-1 family</b>                                                     |               |               | <b>4.86</b>   |             |              |             |
| <b>PHEL49_2077</b> | <b>glycoside hydrolase, GH17 family</b>                                                      |               |               | <b>36.39</b>  |             |              |             |
| PHEL49_2079        | conserved hypothetical protein                                                               | 9.30          | 54.74         | 89.15         | 0.17        | 1.63         | 0.10        |
| <b>PHEL49_2080</b> | <b>endo-1,3(4)-beta-glucanase, GH16 family</b>                                               |               |               | <b>120.79</b> |             |              |             |
| PHEL49_2081        | conserved hypothetical protein, CBM23 and CBM8 domains                                       | 18.59         | 17.31         | 75.17         | 1.07        | 4.34         | 0.25        |
| <b>PHEL49_2082</b> | <b>glycoside hydrolase, GHnc family</b>                                                      | <b>8.68</b>   | <b>1.89</b>   | <b>38.10</b>  | <b>4.60</b> | <b>20.20</b> | <b>0.23</b> |
| PHEL49_2083        | conserved hypothetical protein                                                               |               |               | 85.44         |             |              |             |
| PHEL49_2084        | RagB/SusD domain-containing protein                                                          | 30.35         | 22.82         | 236.72        | 1.33        | 10.37        | 0.13        |
| PHEL49_2085        | TonB-dependent receptor, plug                                                                | 21.12         | 16.19         | 153.77        | 1.30        | 9.50         | 0.14        |
| PHEL49_2086        | ligand-binding sensor protein                                                                | 7.52          | 2.04          | 5.78          | 3.68        | 2.83         | 1.30        |
| PHEL49_2089        | conserved hypothetical protein                                                               |               | 10.51         | 8.49          |             | 0.81         |             |
| PHEL49_2092        | conserved hypothetical protein                                                               |               | 5.52          |               |             |              |             |
| PHEL49_2093        | polyphosphate kinase 2                                                                       | 39.31         | 56.94         | 48.89         | 0.69        | 0.86         | 0.80        |
| PHEL49_2094        | polyphosphate kinase 2                                                                       | 73.68         | 77.87         | 76.04         | 0.95        | 0.98         | 0.97        |
| PHEL49_2097        | conserved hypothetical protein                                                               | 273.25        | 216.70        | 410.74        | 1.26        | 1.90         | 0.67        |
| PHEL49_2098        | conserved hypothetical protein (DUF3822)                                                     | 4.23          | 6.90          | 11.14         | 0.61        | 1.62         | 0.38        |
| PHEL49_2100        | ATPase, AAA family                                                                           | 27.08         | 72.50         | 35.66         | 0.37        | 0.49         | 0.76        |
| PHEL49_2101        | peptidyl-prolyl cis-trans isomerase                                                          | 23.02         | 55.16         | 49.93         | 0.42        | 0.91         | 0.46        |
| PHEL49_2102        | conserved hypothetical protein                                                               | 3.98          |               | 7.87          |             |              | 0.51        |
| PHEL49_2103        | peptidylprolyl isomerase                                                                     | 12.90         | 22.76         | 24.06         | 0.57        | 1.06         | 0.54        |
| PHEL49_2105        | AAA family ATPase-like protein                                                               | 18.47         | 30.09         | 36.47         | 0.61        | 1.21         | 0.51        |
| PHEL49_2107        | methionyl-tRNA formyltransferase                                                             | 36.76         | 31.52         | 20.38         | 1.17        | 0.65         | 1.80        |
| PHEL49_2108        | DNA-binding protein HU-beta                                                                  | 8290.47       | 1213.53       | 653.79        | 6.83        | 0.54         | 12.68       |
| PHEL49_2109        | conserved hypothetical protein (DUF179)                                                      | 25.79         |               | 8.49          |             |              | 3.04        |
| PHEL49_2110        | aminodeoxychorismate lyase                                                                   | 74.06         | 113.77        | 47.36         | 0.65        | 0.42         | 1.56        |
| PHEL49_2111        | conserved hypothetical protein containing START-like domain                                  | 103.82        | 66.19         | 65.38         | 1.57        | 0.99         | 1.59        |

|                    |                                                                         |              |              |              |             |             |             |
|--------------------|-------------------------------------------------------------------------|--------------|--------------|--------------|-------------|-------------|-------------|
| PHEL49_2120        | TonB-dependent receptor, plug                                           | 4.23         |              |              |             |             |             |
| PHEL49_2127        | type I restriction-modification system, DNA-methyltransferase subunit M | 25.71        | 48.88        | 22.57        | 0.53        | 0.46        | 1.14        |
| PHEL49_2129        | type I restriction-modification system, restriction subunit R           | 3.98         | 7.42         | 1.50         | 0.54        | 0.20        | 2.66        |
| PHEL49_2134        | hypothetical protein                                                    | 6.94         |              |              |             |             |             |
| PHEL49_2137        | restriction endonuclease                                                | 22.08        | 11.99        | 5.81         | 1.84        | 0.48        | 3.80        |
| PHEL49_2138        | beta-lactamase superfamily protein                                      | 4.42         |              | 3.88         |             |             | 1.14        |
| PHEL49_2140        | type I restriction-modification system, restriction subunit R           | 8.93         | 2.42         | 2.94         | 3.68        | 1.21        | 3.04        |
| PHEL49_2141        | type I restriction-modification system, DNA-methyltransferase subunit M | 27.34        | 23.34        | 29.15        | 1.17        | 1.25        | 0.94        |
| PHEL49_2142        | type I restriction-modification system, specificity subunit S           | 14.20        | 12.46        | 10.07        | 1.14        | 0.81        | 1.41        |
| PHEL49_2146        | hypothetical protein                                                    | 158.69       | 72.40        | 60.36        | 2.19        | 0.83        | 2.63        |
| PHEL49_2150        | transcriptional regulator, crp/fnr family                               | 22.57        |              |              |             |             |             |
| PHEL49_2168        | hypothetical protein                                                    | 9.67         |              |              |             |             |             |
| PHEL49_2169        | X-Pro dipeptidyl peptidase, S15 family                                  | 5.21         |              |              |             |             |             |
| PHEL49_2172        | 3-isopropylmalate dehydrogenase                                         | 7.13         | 29.03        | 49.27        | 0.25        | 1.70        | 0.14        |
| PHEL49_2173        | 2-isopropylmalate synthase LeuA                                         |              | 3.94         | 15.92        |             | 4.04        |             |
| PHEL49_2174        | 3-isopropylmalate dehydratase small subunit                             |              |              | 72.94        |             |             |             |
| PHEL49_2175        | 3-isopropylmalate dehydratase large subunit                             | 2.71         | 4.41         | 41.01        | 0.61        | 9.29        | 0.07        |
| PHEL49_2176        | 6-phosphofructokinase II                                                |              |              | 34.09        |             |             |             |
| PHEL49_2178        | conserved hypothetical protein, DinB superfamily                        |              |              | 22.29        |             |             |             |
| PHEL49_2180        | protein secretion chaperonin CsaA                                       | 31.25        |              |              |             |             |             |
| PHEL49_2182        | carboxypeptidase, M14 family                                            | 97.24        | 86.85        | 41.73        | 1.12        | 0.48        | 2.33        |
| PHEL49_2183        | conserved hypothetical membrane protein (UPF0187)                       | 3.15         |              |              |             |             |             |
| PHEL49_2185        | transcriptional regulator, AsnC family                                  | 45.14        |              |              |             |             |             |
| PHEL49_2186        | FAD-linked oxidase domain protein                                       |              | 5.11         | 23.94        |             | 4.69        |             |
| PHEL49_2187        | hypothetical protein                                                    | 11.10        | 5.43         |              | 2.05        |             |             |
| PHEL49_2188        | aldo/keto reductase                                                     | 5.35         | 5.81         | 9.38         | 0.92        | 1.62        | 0.57        |
| PHEL49_2189        | flagellar motor rotation protein MotB                                   | 188.31       | 279.25       | 373.33       | 0.67        | 1.34        | 0.50        |
| PHEL49_2190        | valyl-tRNA synthetase                                                   | 40.22        | 46.97        | 52.08        | 0.86        | 1.11        | 0.77        |
| PHEL49_2192        | aspartate aminotransferase                                              | 15.39        | 22.57        | 32.42        | 0.68        | 1.44        | 0.47        |
| PHEL49_2193        | UDP-N-acetylenolpyruvoylglucosamine reductase                           |              |              | 9.38         |             |             |             |
| <b>PHEL49_2199</b> | <b>glycosyltransferase, GT2 family</b>                                  | <b>4.72</b>  | <b>10.26</b> |              | <b>0.46</b> |             |             |
| PHEL49_2200        | RNA polymerase sigma-70 factor                                          | 6.16         |              | 8.10         |             |             | 0.76        |
| PHEL49_2203        | cystathionine beta-synthase                                             | 28.44        | 19.86        | 30.31        | 1.43        | 1.53        | 0.94        |
| PHEL49_2207        | arginyl-tRNA synthetase                                                 | 5.05         | 8.23         | 10.65        | 0.61        | 1.29        | 0.47        |
| PHEL49_2208        | dihydrolipoamide dehydrogenase                                          | 121.60       | 272.42       | 176.49       | 0.45        | 0.65        | 0.69        |
| <b>PHEL49_2210</b> | <b>glycosyltransferase, GT2 family</b>                                  | <b>4.51</b>  |              |              |             |             |             |
| PHEL49_2211        | conserved hypothetical protein containing tetratricopeptide repeats     | 5.25         | 5.71         | 3.07         | 0.92        | 0.54        | 1.71        |
| <b>PHEL49_2214</b> | <b>carbohydrate binding protein, CBM50 domain</b>                       | <b>72.54</b> | <b>23.64</b> | <b>31.84</b> | <b>3.07</b> | <b>1.35</b> | <b>2.28</b> |
| PHEL49_2216        | ribosomal RNA large subunit methyltransferase F                         | 4.10         | 130.38       | 45.93        | 0.03        | 0.35        | 0.09        |
| PHEL49_2217        | conserved hypothetical protein (DUF2317)                                | 19.35        | 82.30        | 31.13        | 0.24        | 0.38        | 0.62        |
| PHEL49_2218        | methyltransferase domain protein                                        |              |              | 32.10        |             |             |             |
| PHEL49_2219        | carboxypeptidase A, M14 family                                          | 18.73        | 46.94        | 25.61        | 0.40        | 0.55        | 0.73        |

|                    |                                                                                |              |              |               |             |             |             |
|--------------------|--------------------------------------------------------------------------------|--------------|--------------|---------------|-------------|-------------|-------------|
| PHEL49_2220        | SSU ribosomal protein S1p                                                      | 163.30       | 217.40       | 226.82        | 0.75        | 1.04        | 0.72        |
| PHEL49_2221        | queuosine biosynthesis QueE radical SAM                                        | 14.11        |              | 33.43         |             |             | 0.42        |
| PHEL49_2222        | cytidylate kinase                                                              | 10.42        | 42.43        | 44.58         | 0.25        | 1.05        | 0.23        |
| PHEL49_2229        | threonyl-tRNA synthetase                                                       | 34.32        | 74.05        | 70.83         | 0.46        | 0.96        | 0.48        |
| PHEL49_2230        | translation initiation factor IF-3                                             | 447.63       | 220.64       | 297.18        | 2.03        | 1.35        | 1.51        |
| PHEL49_2232        | LSU ribosomal protein L20p                                                     | 307.29       | 127.29       | 102.87        | 2.41        | 0.81        | 2.99        |
| PHEL49_2233        | conserved hypothetical protein                                                 | 144.25       | 43.17        | 93.03         | 3.34        | 2.16        | 1.55        |
| <b>PHEL49_2234</b> | <b>capsular glucan synthase, GT4 family</b>                                    | <b>3.01</b>  | <b>4.90</b>  | <b>3.96</b>   | <b>0.61</b> | <b>0.81</b> | <b>0.76</b> |
| PHEL49_2235        | glucose-1-phosphate adenyltransferase                                          | 17.29        | 39.90        | 66.39         | 0.43        | 1.66        | 0.26        |
| <b>PHEL49_2236</b> | <b>putative alpha-1,4-glucan: phosphate maltosyltransferase, GH13-3 family</b> | <b>2.67</b>  |              |               |             |             |             |
| <b>PHEL49_2237</b> | <b>1,4-alpha-glucan branching enzyme, CBM48 domain, GH13-9 family</b>          | <b>11.89</b> | <b>31.31</b> | <b>15.66</b>  | <b>0.38</b> | <b>0.50</b> | <b>0.76</b> |
| <b>PHEL49_2239</b> | <b>alpha-glucosidase, GH31 family</b>                                          | <b>22.33</b> | <b>71.59</b> | <b>200.12</b> | <b>0.31</b> | <b>2.80</b> | <b>0.11</b> |
| PHEL49_2240        | peptide chain release factor 1                                                 | 55.86        | 66.19        | 62.41         | 0.84        | 0.94        | 0.90        |
| PHEL49_2241        | phosphoribosylformylglycinamide cyclo-ligase                                   | 25.19        | 41.05        | 58.05         | 0.61        | 1.41        | 0.43        |
| PHEL49_2248        | glutamine synthetase type III, GlnN                                            | 13.87        | 13.29        | 3.22          | 1.04        | 0.24        | 4.30        |
| PHEL49_2249        | glutamine synthetase type II                                                   | 33.85        | 110.32       | 769.53        | 0.31        | 6.98        | 0.04        |
| PHEL49_2250        | conserved hypothetical protein (DUF4136)                                       | 80.60        | 63.04        | 144.34        | 1.28        | 2.29        | 0.56        |
| PHEL49_2251        | urocanate hydratase                                                            | 56.73        | 56.65        | 20.48         | 1.00        | 0.36        | 2.77        |
| PHEL49_2253        | methylmalonyl-CoA mutase                                                       | 80.30        | 86.37        | 11.06         | 0.93        | 0.13        | 7.26        |
| PHEL49_2261        | dienelactone hydrolase family protein                                          | 10.26        |              |               |             |             |             |
| PHEL49_2265        | amidohydrolase 1 family protein                                                | 39.02        | 39.27        | 25.69         | 0.99        | 0.65        | 1.52        |
| PHEL49_2266        | carboxypeptidase A, M14 family                                                 | 50.08        | 41.37        | 26.00         | 1.21        | 0.63        | 1.93        |
| PHEL49_2269        | X-Pro dipeptidyl-peptidase, S15 family                                         | 17.38        |              | 10.84         |             |             | 1.60        |
| PHEL49_2270        | X-Pro dipeptidyl-peptidase, S15 family                                         | 3.98         |              |               |             |             |             |
| PHEL49_2271        | monooxygenase, flavin-binding family                                           | 4.92         |              |               |             |             |             |
| PHEL49_2273        | conserved hypothetical protein (DUF4197)                                       | 117.19       | 195.18       | 185.16        | 0.60        | 0.95        | 0.63        |
| <b>PHEL49_2274</b> | <b>endo-1,3(4)-beta-glucanase, GH16 family</b>                                 | <b>4.44</b>  | <b>10.85</b> | <b>2.92</b>   | <b>0.41</b> | <b>0.27</b> | <b>1.52</b> |
| PHEL49_2275        | orotidine 5'-phosphate decarboxylase                                           |              |              | 11.50         |             |             |             |
| PHEL49_2277        | triosephosphate isomerase                                                      | 77.38        | 224.58       | 703.67        | 0.34        | 3.13        | 0.11        |
| PHEL49_2278        | ribosomal protein L11 methyltransferase                                        |              |              | 8.36          |             |             |             |
| PHEL49_2287        | conserved hypothetical protein (DUF1684)                                       | 67.71        |              | 69.77         |             |             | 0.97        |
| PHEL49_2289        | enoyl-CoA hydratase/isomerase                                                  | 78.54        | 26.48        | 42.79         | 2.97        | 1.62        | 1.84        |
| PHEL49_2291        | DoxX family protein                                                            |              |              | 12.38         |             |             |             |
| PHEL49_2292        | conserved hypothetical protein (DUF1599)                                       | 74.16        | 21.01        | 46.70         | 3.53        | 2.22        | 1.59        |
| PHEL49_2293        | lysine decarboxylase family                                                    | 9.67         |              |               |             |             |             |
| PHEL49_2294        | dihydropteroate synthase                                                       |              | 7.88         | 6.37          |             | 0.81        |             |
| PHEL49_2295        | conserved hypothetical protein CHP00159                                        |              |              | 6.15          |             |             |             |
| PHEL49_2296        | ABC transporter, ATP-binding protein                                           | 7.18         |              |               |             |             |             |
| PHEL49_2297        | tRNA pseudouridine synthase A                                                  |              | 15.76        | 15.92         |             | 1.01        |             |
| PHEL49_2299        | sensor histidine kinase                                                        |              |              | 2.70          |             |             |             |
| PHEL49_2300        | conserved hypothetical protein                                                 | 75.23        | 167.52       | 23.11         | 0.45        | 0.14        | 3.25        |

|                    |                                                                                                           |             |        |        |      |      |      |
|--------------------|-----------------------------------------------------------------------------------------------------------|-------------|--------|--------|------|------|------|
| PHEL49_2301        | two-component system response regulator, LuxR family                                                      |             |        | 42.79  |      |      |      |
| PHEL49_2303        | transcription termination factor Rho                                                                      | 81.68       | 68.29  | 32.55  | 1.20 | 0.48 | 2.51 |
| PHEL49_2304        | peptidylprolyl isomerase                                                                                  | 101.56      | 80.62  | 99.44  | 1.26 | 1.23 | 1.02 |
| PHEL49_2307        | lipopolysaccharide assembly, LptC-related protein                                                         | 12.90       |        |        |      |      |      |
| PHEL49_2308        | conserved hypothetical protein containing tetratricopeptide repeats                                       | 78.54       | 388.33 | 196.14 | 0.20 | 0.51 | 0.40 |
| PHEL49_2309        | conserved hypothetical protein, putative outer membrane protein                                           | 25.93       | 82.15  | 55.01  | 0.32 | 0.67 | 0.47 |
| PHEL49_2313        | NAD-dependent epimerase/dehydrogenase                                                                     | 15.48       |        |        |      |      |      |
| PHEL49_2316        | ribosomal large subunit pseudouridine synthase B                                                          | 39.83       | 22.71  | 36.71  | 1.75 | 1.62 | 1.08 |
| PHEL49_2318        | mevalonate kinase                                                                                         |             |        | 5.09   |      |      |      |
| PHEL49_2319        | conserved hypothetical protein                                                                            | 54.17       |        | 22.29  |      |      | 2.43 |
| PHEL49_2320        | diphosphomevalonate decarboxylase                                                                         | 8.26        |        | 8.70   |      |      | 0.95 |
| <b>PHEL49_2325</b> | <b>glycosyltransferase, GT4 family</b>                                                                    | <b>3.15</b> |        |        |      |      |      |
| PHEL49_2326        | cell division transporter, ATP-binding protein FtsE (TC 3.A.5.1.1)                                        | 41.67       | 63.65  | 51.43  | 0.65 | 0.81 | 0.81 |
| PHEL49_2327        | TPR domain protein                                                                                        | 7.52        | 14.14  | 22.86  | 0.53 | 1.62 | 0.33 |
| PHEL49_2328        | TonB-dependent receptor                                                                                   |             |        | 10.49  |      |      |      |
| PHEL49_2330        | peptidase M28 family                                                                                      | 20.83       | 12.73  | 15.43  | 1.64 | 1.21 | 1.35 |
| PHEL49_2332        | amidohydrolase 3 family protein                                                                           | 7.77        |        |        |      |      |      |
| PHEL49_2335        | tryptophan synthase beta chain                                                                            |             |        | 4.15   |      |      |      |
| PHEL49_2337        | indole-3-glycerol phosphate synthase                                                                      | 14.01       | 26.63  | 21.52  | 0.53 | 0.81 | 0.65 |
| PHEL49_2339        | anthranilate phosphoribosyltransferase                                                                    | 13.17       | 30.64  | 12.38  | 0.43 | 0.40 | 1.06 |
| PHEL49_2341        | anthranilate synthase component I                                                                         | 33.85       | 48.80  | 22.29  | 0.69 | 0.46 | 1.52 |
| PHEL49_2343        | aspartyl-tRNA(Asn) amidotransferase subunit A                                                             | 26.55       | 64.89  | 57.69  | 0.41 | 0.89 | 0.46 |
| PHEL49_2344        | aspartyl-tRNA synthetase                                                                                  | 18.27       | 70.04  | 22.64  | 0.26 | 0.32 | 0.81 |
| PHEL49_2345        | DNA gyrase subunit B                                                                                      | 148.58      | 165.48 | 107.73 | 0.90 | 0.65 | 1.38 |
| PHEL49_2346        | conserved hypothetical protein                                                                            | 135.42      | 92.90  | 84.46  | 1.46 | 0.91 | 1.60 |
| PHEL49_2347        | malate dehydrogenase                                                                                      | 655.92      | 555.05 | 782.87 | 1.18 | 1.41 | 0.84 |
| PHEL49_2348        | formate-tetrahydrofolate ligase                                                                           | 41.07       | 16.28  |        | 2.52 |      |      |
| PHEL49_2350        | protein-export membrane protein SecD (TC 3.A.5.1.1) / protein-export membrane protein SecF (TC 3.A.5.1.1) | 97.80       | 190.00 | 113.92 | 0.51 | 0.60 | 0.86 |
| PHEL49_2352        | adenylate kinase                                                                                          | 45.14       | 76.17  | 50.94  | 0.59 | 0.67 | 0.89 |
| PHEL49_2353        | GTP-binding protein Obg                                                                                   | 3.76        |        |        |      |      |      |
| PHEL49_2358        | aminotransferase class III                                                                                |             | 5.76   | 1.55   |      | 0.27 |      |
| PHEL49_2359        | amidohydrolase 1 family protein                                                                           | 28.86       | 9.95   | 8.77   | 2.90 | 0.88 | 3.29 |
| PHEL49_2361        | 4-hydroxyproline epimerase                                                                                | 9.15        |        |        |      |      |      |
| PHEL49_2362        | conserved hypothetical protein (DUF885)                                                                   | 19.20       |        |        |      |      |      |
| PHEL49_2363        | aldehyde dehydrogenase                                                                                    | 24.95       |        |        |      |      |      |
| PHEL49_2364        | dihydrodipicolinate synthase                                                                              | 113.51      |        |        |      |      |      |
| PHEL49_2366        | tetratricopeptide-like helical                                                                            | 4.23        |        |        |      |      |      |
| PHEL49_2371        | magnesium and cobalt transport protein CorA                                                               |             | 5.81   | 4.69   |      | 0.81 |      |
| PHEL49_2373        | N-formylkynurenine (aryl-) formamidase                                                                    | 29.02       | 35.46  | 31.84  | 0.82 | 0.90 | 0.91 |
| PHEL49_2375        | crossover junction endodeoxyribonuclease RuvC                                                             | 20.31       |        | 8.92   |      |      | 2.28 |
| PHEL49_2377        | S-adenosyl-L-methionine-dependent methyltransferase                                                       |             |        | 7.13   |      |      |      |

|                    |                                                                                                                                         |             |             |              |             |             |             |
|--------------------|-----------------------------------------------------------------------------------------------------------------------------------------|-------------|-------------|--------------|-------------|-------------|-------------|
| PHEL49_2378        | conserved hypothetical protein                                                                                                          |             |             | 23.46        |             |             |             |
| PHEL49_2379        | branched-chain amino acid aminotransferase                                                                                              | 39.93       | 73.55       | 70.87        | 0.54        | 0.96        | 0.56        |
| PHEL49_2382        | heavy metal transporter                                                                                                                 | 38.09       |             | 50.15        |             |             | 0.76        |
| PHEL49_2384        | conserved hypothetical protein                                                                                                          |             | 7.88        | 6.37         |             | 0.81        |             |
| PHEL49_2385        | conserved hypothetical protein (DUF2911)                                                                                                |             | 10.03       |              |             |             |             |
| PHEL49_2388        | cobalt-zinc-cadmium resistance protein CzcA; cation efflux system protein CusA                                                          | 1.98        | 4.03        |              | 0.49        |             |             |
| PHEL49_2392        | conserved hypothetical protein containing ribosomal protein S5 domain 2-type fold                                                       | 3.87        | 12.61       | 10.19        | 0.31        | 0.81        | 0.38        |
| PHEL49_2393        | hydroxymethylglutaryl-CoA reductase                                                                                                     |             | 16.72       | 13.51        |             | 0.81        |             |
| PHEL49_2394        | dipeptidyl peptidase IV, S9 family                                                                                                      | 17.73       | 7.88        | 2.12         | 2.25        | 0.27        | 8.35        |
| PHEL49_2397        | thioredoxin family protein                                                                                                              |             |             | 25.47        |             |             |             |
| <b>PHEL49_2400</b> | <b>lipid-A-disaccharide synthase, GT19 family</b>                                                                                       | <b>3.22</b> |             |              |             |             |             |
| PHEL49_2402        | stationary-phase survival acid phosphatase                                                                                              |             |             | 6.37         |             |             |             |
| PHEL49_2403        | peptidase S41 family                                                                                                                    |             | 39.02       |              |             |             |             |
| PHEL49_2404        | thioesterase superfamily protein                                                                                                        | 7.97        | 38.94       |              | 0.20        |             |             |
| PHEL49_2405        | zinc-binding dehydrogenase                                                                                                              |             |             | 5.09         |             |             |             |
| PHEL49_2408        | peptidase M20 family                                                                                                                    | 23.90       | 25.96       | 24.47        | 0.92        | 0.94        | 0.98        |
| PHEL49_2409        | OmpA family protein                                                                                                                     | 55.40       | 77.73       | 107.39       | 0.71        | 1.38        | 0.52        |
| PHEL49_2410        | peptidyl-prolyl cis-trans isomerase A                                                                                                   | 62.50       |             | 48.01        |             |             | 1.30        |
| PHEL49_2411        | lysyl-tRNA synthetase (class II)                                                                                                        | 50.53       | 59.28       | 67.86        | 0.85        | 1.14        | 0.74        |
| PHEL49_2413        | glucose inhibited division protein B                                                                                                    | 64.89       | 82.74       | 126.30       | 0.78        | 1.53        | 0.51        |
| PHEL49_2415        | aspartate aminotransferase                                                                                                              | 41.55       | 75.22       | 52.68        | 0.55        | 0.70        | 0.79        |
| PHEL49_2417        | cell division protein FtsQ                                                                                                              | 2.94        | 11.19       | 15.50        | 0.26        | 1.39        | 0.19        |
| PHEL49_2418        | cell division protein FtsA                                                                                                              | 28.21       | 29.88       | 42.72        | 0.94        | 1.43        | 0.66        |
| PHEL49_2419        | cell division protein FtsQ                                                                                                              | 9.67        |             | 6.37         |             |             | 1.52        |
| PHEL49_2420        | UDP-N-acetylmuramate-L-alanine ligase                                                                                                   | 4.06        | 8.83        | 5.35         | 0.46        | 0.61        | 0.76        |
| <b>PHEL49_2421</b> | <b>UDP-N-acetylglucosamine-N-acetylmuramyl- (pentapeptide) pyrophosphoryl-undecaprenol N-acetylglucosamine transferase, GT28 family</b> | <b>9.91</b> | <b>5.38</b> | <b>19.57</b> | <b>1.84</b> | <b>3.64</b> | <b>0.51</b> |
| PHEL49_2424        | phospho-N-acetylmuramoyl-pentapeptide- transferase                                                                                      | 2.94        |             | 5.81         |             |             | 0.51        |
| PHEL49_2425        | UDP-N-acetylmuramoylalanyl-D-glutamate-2,6- diaminopimelate ligase                                                                      | 4.23        |             | 9.29         |             |             | 0.46        |
| PHEL49_2428        | S-adenosyl-methyltransferase MraW                                                                                                       |             |             | 7.64         |             |             |             |
| PHEL49_2429        | cell division protein MraZ                                                                                                              | 50.78       |             | 52.01        |             |             | 0.98        |
| PHEL49_2430        | alpha/beta hydrolase                                                                                                                    | 48.36       | 51.22       | 57.31        | 0.94        | 1.12        | 0.84        |
| PHEL49_2431        | GTP-binding protein YsxC/EngB                                                                                                           | 11.28       |             |              |             |             |             |
| PHEL49_2434        | nitroreductase family protein                                                                                                           | 12.09       |             |              |             |             |             |
| PHEL49_2435        | penicillin amidase, peptidase S45 family                                                                                                | 11.90       | 7.27        | 15.68        | 1.64        | 2.16        | 0.76        |
| PHEL49_2436        | DegT/DnrJ/EryC1/StrS aminotransferase                                                                                                   | 29.92       | 30.79       | 41.47        | 0.97        | 1.35        | 0.72        |
| PHEL49_2437        | UDP-glucose 4-epimerase                                                                                                                 | 135.42      | 113.22      | 124.34       | 1.20        | 1.10        | 1.09        |
| PHEL49_2438        | conserved hypothetical protein (DUF2911)                                                                                                | 27.08       | 341.99      | 53.49        | 0.08        | 0.16        | 0.51        |
| PHEL49_2440        | ferrous iron transport protein B                                                                                                        | 4.29        |             | 2.26         |             |             | 1.90        |

|                    |                                                                                                    |               |              |               |             |             |             |
|--------------------|----------------------------------------------------------------------------------------------------|---------------|--------------|---------------|-------------|-------------|-------------|
| PHEL49_2442        | SCO1/SenC family protein                                                                           |               |              | 24.00         |             |             |             |
| PHEL49_2444        | peptidase M50 family                                                                               | 14.11         | 39.07        | 16.72         | 0.36        | 0.43        | 0.84        |
| PHEL49_2445        | TonB-dependent receptor, plug                                                                      | 8.08          | 87.27        | 162.34        | 0.09        | 1.86        | 0.05        |
| PHEL49_2449        | 1-deoxy-D-xylulose 5-phosphate synthase                                                            | 4.17          |              |               |             |             |             |
| <b>PHEL49_2450</b> | <b>glycoside hydrolase, GH74 family</b>                                                            | <b>100.97</b> | <b>48.39</b> | <b>165.79</b> | <b>2.09</b> | <b>3.43</b> | <b>0.61</b> |
| PHEL49_2451        | deoxyguanosinetriphosphate triphosphohydrolase                                                     | 22.57         | 10.82        | 27.97         | 2.09        | 2.59        | 0.81        |
| PHEL49_2454        | ribonucleotide reductase of class Ia (aerobic), alpha subunit                                      | 37.20         | 44.86        | 39.19         | 0.83        | 0.87        | 0.95        |
| PHEL49_2455        | ribonucleotide reductase of class Ia (aerobic), beta subunit                                       | 73.05         | 104.51       | 84.46         | 0.70        | 0.81        | 0.86        |
| PHEL49_2456        | cold shock DNA-binding domain protein CspA                                                         | 38.69         | 47.28        |               | 0.82        |             |             |
| PHEL49_2461        | conserved hypothetical protein containing carboxypeptidase-like regulatory domain                  | 1.44          | 16.43        | 5.69          | 0.09        | 0.35        | 0.25        |
| PHEL49_2462        | NADP-dependent malic enzyme                                                                        | 23.38         | 53.85        | 39.27         | 0.43        | 0.73        | 0.60        |
| PHEL49_2464        | gliding motility protein SprA                                                                      | 67.96         | 82.02        | 82.52         | 0.83        | 1.01        | 0.82        |
| PHEL49_2465        | glycine cleavage system protein H                                                                  | 29.02         |              | 31.84         |             |             | 0.91        |
| PHEL49_2467        | TonB protein                                                                                       | 121.87        | 101.49       | 117.68        | 1.20        | 1.16        | 1.04        |
| PHEL49_2469        | dodecin                                                                                            | 19.35         |              |               |             |             |             |
| PHEL49_2473        | outer membrane efflux protein                                                                      | 48.36         | 96.81        | 50.94         | 0.50        | 0.53        | 0.95        |
| PHEL49_2476        | SCO1/SenC family protein                                                                           | 70.22         | 24.52        | 56.13         | 2.86        | 2.29        | 1.25        |
| PHEL49_2477        | conserved hypothetical protein                                                                     | 54.69         |              | 48.01         |             |             | 1.14        |
| PHEL49_2479        | cytochrome c oxidase subunit III                                                                   | 53.07         | 29.82        | 31.32         | 1.78        | 1.05        | 1.69        |
| PHEL49_2483        | enoyl-CoA hydratase/isomerase                                                                      | 24.18         |              | 19.10         |             |             | 1.27        |
| PHEL49_2485        | leucyl-tRNA synthetase                                                                             | 34.12         | 95.55        | 32.99         | 0.36        | 0.35        | 1.03        |
| PHEL49_2487        | malonyl CoA-acyl carrier protein transacylase                                                      | 32.76         | 21.35        | 17.26         | 1.53        | 0.81        | 1.90        |
| PHEL49_2490        | carboxymuconolactone decarboxylase                                                                 | 45.14         |              |               |             |             |             |
| PHEL49_2492        | SAM-dependent methyltransferase DSY4148 (UbiE paralog)                                             | 3.76          | 6.13         | 27.24         | 0.61        | 4.44        | 0.14        |
| PHEL49_2496        | hemolysin-type calcium-binding protein                                                             | 0.68          | 6.65         | 3.36          | 0.10        | 0.51        | 0.20        |
| PHEL49_2499        | recombination protein RecR                                                                         | 11.78         |              |               |             |             |             |
| PHEL49_2501        | ferrochelataase                                                                                    | 31.25         | 76.38        | 70.87         | 0.41        | 0.93        | 0.44        |
| PHEL49_2503        | transcriptional regulator, AraC family                                                             | 11.95         | 77.87        | 23.60         | 0.15        | 0.30        | 0.51        |
| PHEL49_2505        | glutamyl-tRNA reductase                                                                            | 17.29         | 4.69         | 5.69          | 3.68        | 1.21        | 3.04        |
| PHEL49_2506        | porphobilinogen deaminase HemC                                                                     | 2.30          |              | 3.02          |             |             | 0.76        |
| PHEL49_2507        | delta-aminolevulinic acid dehydratase                                                              | 35.73         | 27.58        | 24.76         | 1.30        | 0.90        | 1.44        |
| PHEL49_2508        | glutamate-1-semialdehyde aminotransferase                                                          | 20.61         | 31.18        | 13.57         | 0.66        | 0.44        | 1.52        |
| PHEL49_2509        | uroporphyrinogen decarboxylase                                                                     | 3.56          |              |               |             |             |             |
| PHEL49_2512        | conserved hypothetical protein                                                                     | 2.76          |              |               |             |             |             |
| PHEL49_2514        | dihydrolipoamide acyltransferase component of branched-chain alpha-keto acid dehydrogenase complex | 66.30         | 108.02       | 104.01        | 0.61        | 0.96        | 0.64        |
| PHEL49_2515        | conserved hypothetical protein                                                                     | 82.75         | 73.55        | 92.45         | 1.13        | 1.26        | 0.90        |
| PHEL49_2517        | dihydrolipoamide acetyltransferase component of pyruvate dehydrogenase complex                     | 125.91        | 479.99       | 301.87        | 0.26        | 0.63        | 0.42        |
| PHEL49_2518        | pyruvate dehydrogenase E1 component alpha subunit                                                  | 128.10        | 199.77       | 202.40        | 0.64        | 1.01        | 0.63        |
| PHEL49_2522        | conserved hypothetical protein (DUF2807)                                                           |               | 33.94        |               |             |             |             |

|             |                                                                                       |        |         |        |       |      |       |
|-------------|---------------------------------------------------------------------------------------|--------|---------|--------|-------|------|-------|
| PHEL49_2523 | phage shock protein PspC                                                              | 4.10   | 6.69    | 10.81  | 0.61  | 1.62 | 0.38  |
| PHEL49_2527 | signal transduction histidine kinase, phosphotransfer (Hpt) domain-containing protein | 9.03   |         |        |       |      |       |
| PHEL49_2528 | conserved hypothetical protein (DUF28)                                                | 60.45  | 47.28   | 47.76  | 1.28  | 1.01 | 1.27  |
| PHEL49_2530 | phosphate acetyltransferase                                                           | 4.45   |         | 2.35   |       |      | 1.90  |
| PHEL49_2533 | methylcrotonyl-CoA carboxylase carboxyl transfer ase subunit                          | 18.06  | 11.03   | 16.34  | 1.64  | 1.48 | 1.10  |
| PHEL49_2534 | DNA binding helix-turn helix protein                                                  | 7.00   |         |        |       |      |       |
| PHEL49_2535 | malate synthase                                                                       | 160.53 |         |        |       |      |       |
| PHEL49_2536 | isocitrate lyase                                                                      | 172.04 |         |        |       |      |       |
| PHEL49_2539 | NADPH-dependent FMN reductase                                                         | 54.17  |         | 17.83  |       |      | 3.04  |
| PHEL49_2544 | 2,4-dienoyl-CoA reductase (NADPH)                                                     | 122.78 | 82.37   | 123.63 | 1.49  | 1.50 | 0.99  |
| PHEL49_2545 | UDP-3-O-(3-hydroxymyristoyl) glucosamine N-acyltransferase                            | 69.64  |         | 22.93  |       |      | 3.04  |
| PHEL49_2547 | ABC transporter, ATP-binding protein                                                  | 50.51  | 99.81   | 90.57  | 0.51  | 0.91 | 0.56  |
| PHEL49_2552 | N-acetylmuramic acid 6-phosphate etherase                                             | 9.34   |         | 9.22   |       |      | 1.01  |
| PHEL49_2553 | conserved hypothetical protein (DUF4249)                                              | 6.55   | 96.09   | 46.01  | 0.07  | 0.48 | 0.14  |
| PHEL49_2554 | TonB-dependent receptor, plug                                                         | 6.02   | 51.48   | 42.60  | 0.12  | 0.83 | 0.14  |
| PHEL49_2555 | socitrate dehydrogenase i                                                             | 40.96  | 65.38   | 47.33  | 0.63  | 0.72 | 0.87  |
| PHEL49_2556 | LSU ribosomal protein L19p                                                            | 390.62 | 271.56  | 500.63 | 1.44  | 1.84 | 0.78  |
| PHEL49_2563 | ribosomal S6 modification enzyme RimK                                                 | 161.63 | 217.08  | 301.97 | 0.74  | 1.39 | 0.54  |
| PHEL49_2566 | HYR domain-containing protein                                                         | 12.28  |         |        |       |      |       |
| PHEL49_2567 | hypothetical protein                                                                  | 103.82 |         |        |       |      |       |
| PHEL49_2583 | phosphoenolpyruvate carboxylase                                                       | 19.75  | 101.13  | 166.23 | 0.20  | 1.64 | 0.12  |
| PHEL49_2587 | lysophospholipase                                                                     |        |         | 11.50  |       |      |       |
| PHEL49_2590 | dihydrolipoamide dehydrogenase                                                        | 59.58  | 130.18  | 126.60 | 0.46  | 0.97 | 0.47  |
| PHEL49_2591 | conserved hypothetical protein containing haem-binding domain                         | 41.38  |         | 123.82 |       |      | 0.33  |
| PHEL49_2593 | phage tail collar                                                                     | 63.60  | 86.92   | 51.33  | 0.73  | 0.59 | 1.24  |
| PHEL49_2594 | conserved hypothetical protein                                                        | 8.21   | 8.69    | 1.08   | 0.94  | 0.12 | 7.59  |
| PHEL49_2595 | conserved hypothetical protein                                                        |        | 22.63   |        |       |      |       |
| PHEL49_2596 | peptidase, M3 family                                                                  | 2.64   | 7.16    | 11.58  | 0.37  | 1.62 | 0.23  |
| PHEL49_2598 | phosphoribosylaminoimidazole carboxylase, ATPase subunit                              | 13.85  | 35.10   | 28.37  | 0.39  | 0.81 | 0.49  |
| PHEL49_2600 | transcription elongation factor GreA                                                  | 71.47  | 165.48  | 108.96 | 0.43  | 0.66 | 0.66  |
| PHEL49_2602 | two-component system sensor histidine kinase                                          | 6.02   | 9.81    | 35.66  | 0.61  | 3.64 | 0.17  |
| PHEL49_2603 | flavin reductase domain-contains FMN-binding protein                                  | 4.37   |         |        |       |      |       |
| PHEL49_2604 | conserved hypothetical protein (DUF3127)                                              | 246.65 | 23.64   | 12.74  | 10.43 | 0.54 | 19.37 |
| PHEL49_2608 | conserved hypothetical protein                                                        | 49.89  | 23.23   | 65.69  | 2.15  | 2.83 | 0.76  |
| PHEL49_2609 | conserved hypothetical protein                                                        | 40.01  | 20.06   | 89.15  | 1.99  | 4.44 | 0.45  |
| PHEL49_2612 | TatD family hydrolase                                                                 |        |         | 6.15   |       |      |       |
| PHEL49_2613 | ATP-dependent RNA helicase                                                            |        |         | 5.14   |       |      |       |
| PHEL49_2616 | two-component transcriptional regulator, LuxR family                                  | 22.57  |         |        |       |      |       |
| PHEL49_2621 | OmpA family protein                                                                   | 289.87 | 1034.25 | 437.41 | 0.28  | 0.42 | 0.66  |
| PHEL49_2622 | thiamine biosynthesis lipoprotein ApbE                                                | 9.40   |         | 12.38  |       |      | 0.76  |
| PHEL49_2624 | methionine aminopeptidase                                                             | 6.77   |         | 23.77  |       |      | 0.28  |



|                   |                                                                                     |              |              |              |             |             |             |
|-------------------|-------------------------------------------------------------------------------------|--------------|--------------|--------------|-------------|-------------|-------------|
| PHL49_2625        | thioredoxin family protein                                                          |              | 18.39        | 78.01        |             | 4.24        |             |
| PHL49_2626        | phosphoglycerate mutase                                                             | 14.77        | 52.15        | 94.02        | 0.28        | 1.80        | 0.16        |
| PHL49_2627        | phenylalanine 4-monooxygenase                                                       | 44.11        | 46.80        |              | 0.94        |             |             |
| PHL49_2629        | conserved hypothetical protein                                                      |              | 1.47         | 3.57         |             | 2.42        |             |
| PHL49_2630        | GSCFA family protein                                                                | 5.49         |              |              |             |             |             |
| PHL49_2633        | alanyl-tRNA synthetase                                                              | 34.88        | 35.66        | 44.13        | 0.98        | 1.24        | 0.79        |
| PHL49_2634        | peptidase, M23 family                                                               | 7.32         | 20.87        | 26.50        | 0.35        | 1.27        | 0.28        |
| PHL49_2635        | transcriptional regulator, MerR family                                              | 10.42        |              |              |             |             |             |
| PHL49_2636        | acyl-CoA dehydrogenase                                                              | 206.11       | 186.57       | 161.26       | 1.10        | 0.86        | 1.28        |
| PHL49_2637        | short chain dehydrogenase                                                           | 178.94       | 82.74        | 95.52        | 2.16        | 1.15        | 1.87        |
| PHL49_2638        | acyl-CoA dehydrogenase                                                              | 132.47       | 175.07       | 81.40        | 0.76        | 0.46        | 1.63        |
| PHL49_2639        | aminoglycoside phosphotransferase                                                   | 59.24        | 93.77        | 42.35        | 0.63        | 0.45        | 1.40        |
| PHL49_2640        | 3-oxoacyl-(acyl-carrier protein) reductase                                          | 295.91       | 163.44       | 204.72       | 1.81        | 1.25        | 1.45        |
| PHL49_2641        | LemA family protein                                                                 | 1333.55      | 1549.28      | 1558.24      | 0.86        | 1.01        | 0.86        |
| PHL49_2642        | conserved hypothetical protein (DUF477)                                             | 63.73        | 32.45        | 15.73        | 1.96        | 0.48        | 4.05        |
| PHL49_2643        | conserved hypothetical protein (DUF477)                                             | 18.68        |              |              |             |             |             |
| PHL49_2644        | conserved hypothetical protein                                                      | 4.10         | 23.40        |              | 0.18        |             |             |
| PHL49_2646        | metallophosphoesterase                                                              | 13.74        | 16.79        | 5.17         | 0.82        | 0.31        | 2.66        |
| <b>PHL49_2648</b> | <b>glycosyltransferase, GT4 family</b>                                              | <b>7.13</b>  |              |              |             |             |             |
| PHL49_2652        | conserved hypothetical protein (UPF0061)                                            | 4.51         |              |              |             |             |             |
| <b>PHL49_2653</b> | <b>glycoside hydrolase, GH26 family / putative mannan endo-1,4-beta-mannosidase</b> | <b>25.58</b> | <b>41.68</b> | <b>43.59</b> | <b>0.61</b> | <b>1.05</b> | <b>0.59</b> |
| <b>PHL49_2654</b> | <b>glycosyltransferase, GT2 family</b>                                              | <b>5.55</b>  |              | <b>7.31</b>  |             |             | <b>0.76</b> |
| PHL49_2655        | TPR domain containing protein                                                       | 6.27         |              | 9.91         |             |             | 0.63        |
| PHL49_2656        | surface antigen BspA                                                                |              |              | 3.88         |             |             |             |
| PHL49_2660        | metal-dependent phosphohydrolase, HD subdomain                                      | 4.51         |              | 19.81        |             |             | 0.23        |
| PHL49_2661        | conserved hypothetical protein                                                      | 22.81        | 14.39        | 13.57        | 1.59        | 0.94        | 1.68        |
| PHL49_2662        | GTP-binding protein EngA                                                            | 28.44        | 41.92        | 39.23        | 0.68        | 0.94        | 0.72        |
| PHL49_2665        | Legionella vir region protein                                                       | 4.10         |              |              |             |             |             |
