# Supplementary material
Source: PubMed Central journal article supplement (PMC4438327)
Supplement: ismej2014225x9.pdf [file ismej2014225x9.pdf]

**Supplementary Table S7** Recruitment of metagenomic reads by the genomes of *Polaribacter* sp. Hel1\_33\_4 and s. Hel1\_85.

| site            | date       | time  | plankton size<br>fraction | platform             | reads       | reads with                               | reads with                       | percentage                    | percentage                           | study |                                   |
|-----------------|------------|-------|---------------------------|----------------------|-------------|------------------------------------------|----------------------------------|-------------------------------|--------------------------------------|-------|-----------------------------------|
|                 |            |       |                           |                      |             | quality filtered<br>reads for<br>mapping | ≥95%<br>matches to<br>Hel1_33_49 | ≥95%<br>matches to<br>Hel1_85 | of reads<br>mapping to<br>Hel1_33_49 |       | of reads<br>mapping to<br>Hel1_85 |
| English Channel | 2008/01/28 | day   | 0.2 - 1.6 µm              | 454 FLX Ti (1 PTP)   | 616,793     | 340,714                                  | 7                                | 8                             | 0.002                                | 0.002 | WCO Microbial Metagenomics        |
| English Channel | 2008/01/28 | night | 0.2 - 1.6 µm              | 454 FLX Ti (1 PTP)   | 784,823     | 513,848                                  | 12                               | 15                            | 0.002                                | 0.003 | WCO Microbial Metagenomics        |
| English Channel | 2008/04/22 | day   | 0.2 - 1.6 µm              | 454 FLX Ti (1 PTP)   | 637,801     | 415,898                                  | 29                               | 22                            | 0.007                                | 0.005 | WCO Microbial Metagenomics        |
| English Channel | 2008/04/22 | night | 0.2 - 1.6 µm              | 454 FLX Ti (1 PTP)   | 493,003     | 315,231                                  | 74                               | 58                            | 0.023                                | 0.018 | WCO Microbial Metagenomics        |
| English Channel | 2008/04/27 | 4 pm  | 0.2 - 1.6 µm              | 454 FLX Ti (1 PTP)   | 620,759     | 409,917                                  | 22                               | 14                            | 0.005                                | 0.003 | WCO Microbial Metagenomics        |
| English Channel | 2008/04/27 | 10 pm | 0.2 - 1.6 µm              | 454 FLX Ti (1 PTP)   | 524,953     | 346,364                                  | 47                               | 32                            | 0.014                                | 0.009 | WCO Microbial Metagenomics        |
| English Channel | 2008/08/28 | 4 am  | 0.2 - 1.6 µm              | 454 FLX Ti (1 PTP)   | 500,117     | 333,78                                   | 58                               | 38                            | 0.017                                | 0.011 | WCO Microbial Metagenomics        |
| English Channel | 2008/08/28 | 10 am | 0.2 - 1.6 µm              | 454 FLX Ti (1 PTP)   | 326,475     | 215,474                                  | 69                               | 57                            | 0.032                                | 0.027 | WCO Microbial Metagenomics        |
| North Sea       | 2008/08/21 | day   | 0.2 - 3 µm                | 454 FLX Ti (0.5 PTP) | 671,375     | 495,568                                  | 8                                | 5                             | 0.002                                | 0.001 | MIMAS                             |
| North Sea       | 2009/02/11 | day   | 0.2 - 3 µm                | 454 FLX Ti (2.5 PTP) | 2,203,446   | 1,604,288                                | 110                              | 47                            | 0.007                                | 0.003 | MIMAS                             |
| North Sea       | 2009/03/31 | day   | 0.2 - 3 µm                | 454 FLX Ti (2.5 PTP) | 1,666,535   | 1,140,320                                | 126                              | 41                            | 0.011                                | 0.004 | MIMAS                             |
| North Sea       | 2009/04/07 | day   | 0.2 - 3 µm                | 454 FLX Ti (2 PTP)   | 2,109,239   | 1,537,921                                | 1,470                            | 372                           | 0.096                                | 0.024 | MIMAS                             |
| North Sea       | 2009/04/14 | day   | 0.2 - 3 µm                | 454 FLX Ti (4 PTP)   | 4,588,441   | 3,236,386                                | 3,353                            | 1,006                         | 0.104                                | 0.031 | MIMAS                             |
| North Sea       | 2009/04/14 | day   | 3 - 10 µm                 | 454 FLX Ti (2 PTP)   | 2,114,794   | 867,462                                  | 789                              | 150                           | 0.091                                | 0.017 | MIMAS                             |
| North Sea       | 2009/06/16 | day   | 0.2 - 3 µm                | 454 FLX Ti (1 PTP)   | 1,120,072   | 817,516                                  | 84                               | 57                            | 0.010                                | 0.007 | MIMAS                             |
| North Sea       | 2009/09/01 | day   | 0.2 - 3 µm                | 454 FLX Ti (2 PTP)   | 2,714,430   | 1,728,646                                | 38                               | 26                            | 0.002                                | 0.002 | MIMAS                             |
| North Sea       | 2010/03/03 | day   | 0.2 - 3 µm                | Hiseq2000 (1 lane)   | 280,055,355 | 231,569,084                              | 9,106                            | 7,439                         | 0.004                                | 0.003 | COGITO                            |
| North Sea       | 2010/04/08 | day   | 0.2 - 3 µm                | Hiseq2000 (1 lane)   | 325,087,882 | 262,136,222                              | 523,874                          | 100,967                       | 0.200                                | 0.039 | COGITO                            |
| North Sea       | 2010/05/04 | day   | 0.2 - 3 µm                | Hiseq2000 (1 lane)   | 269,599,216 | 235,206,610                              | 1,211,331                        | 140,059                       | 0.515                                | 0.060 | COGITO                            |
| North Sea       | 2010/05/18 | day   | 0.2 - 3 µm                | Hiseq2000 (1 lane)   | 305,056,659 | 234,645,008                              | 185,754                          | 62,082                        | 0.079                                | 0.026 | COGITO                            |
| North Sea       | 2011/03/24 | day   | 0.2 - 3 µm                | Hiseq2000 (1 lane)   | 300,905,947 | 257,717,888                              | 11,861                           | 8,941                         | 0.005                                | 0.003 | COGITO                            |
| North Sea       | 2011/04/28 | day   | 0.2 - 3 µm                | Hiseq2000 (1 lane)   | 291,006,941 | 248,287,506                              | 43,142                           | 29,863                        | 0.017                                | 0.012 | COGITO                            |
| North Sea       | 2011/05/26 | day   | 0.2 - 3 µm                | Hiseq2000 (1 lane)   | 320,064,355 | 271,662,818                              | 54,761                           | 29,967                        | 0.020                                | 0.011 | COGITO                            |
| North Sea       | 2012/03/08 | day   | 0.2 - 3 µm                | Hiseq2000 (1 lane)   | 307,144,972 | 240,234,458                              | 8,892                            | 8,666                         | 0.004                                | 0.004 | COGITO                            |
| North Sea       | 2012/04/16 | day   | 0.2 - 3 µm                | Hiseq2000 (1 lane)   | 255,075,719 | 220,440,100                              | 9,693                            | 8,373                         | 0.004                                | 0.004 | COGITO                            |
| North Sea       | 2012/05/10 | day   | 0.2 - 3 µm                | Hiseq2000 (1 lane)   | 267,926,290 | 233,580,192                              | 34,217                           | 19,815                        | 0.015                                | 0.008 | COGITO                            |

Samples for the WCO (Western Channel Observatory) Microbial Metagenomics Study (Gilbert *et al.*, 2010) were obtained from the long-term research site L4 in the English Channel, and those for the MIMAS (Microbial Interactions in Marine Systems; Teeling *et al.*, 2012) and COGITO (Coastal Microbe Genomic & Taxonomic Observatory; DOE-JGI Community Sequencing Project 998) studies at the long-term research site "Kabeltonne" near the North Sea Island Helgoland, from where also *Polaribacter* sp. Hel1\_33\_49 and Hel1\_85 were isolated. Metagenomes around the isolation date of the *Polaribacter* strains (2010/04/20) are highlighted in red. See supplementary text for details.
