# Supplementary material
Source: PubMed Central journal article supplement (PMC4438327)
Supplement: ismej2014225x10.pdf [file ismej2014225x10.pdf]

**Supplementary Table S8** Gliding motility-related genes in sequenced *Polaribacter* strains.

|                                                                    | <i>P. sp.</i><br>Hel1_85<br>PHEL85 | <i>P. sp.</i><br>Hel1_33_49<br>PHEL49 | <i>P. irgensii</i><br>23-P <sup>T</sup><br>PI23P* | <i>P. sp.</i><br>MED152<br>MED152* |
|--------------------------------------------------------------------|------------------------------------|---------------------------------------|---------------------------------------------------|------------------------------------|
| Gliding motility                                                   | +                                  | +                                     | –                                                 | NA                                 |
| Adhesin-like                                                       |                                    |                                       |                                                   |                                    |
| <i>remA</i>                                                        | -                                  | 152                                   | 00785                                             | 12344                              |
| <i>remB</i>                                                        | 2425                               | –                                     | –                                                 | –                                  |
| <i>sprB</i>                                                        | –                                  | 1139                                  | –                                                 | –                                  |
| ATP-binding cassette transporter                                   |                                    |                                       |                                                   |                                    |
| <i>gldA</i>                                                        | 286                                | 425                                   | 02167                                             | 11809                              |
| <i>gldF</i>                                                        | 71                                 | 1405                                  | 12617                                             | 13119                              |
| <i>gldG</i>                                                        | 70                                 | 1404                                  | 12622                                             | 13114                              |
| Additional protein required for gliding                            |                                    |                                       |                                                   |                                    |
| <i>gldB</i> <sup>†</sup>                                           | 2910                               | 275                                   | 02652                                             | 11089                              |
| <i>gldC</i>                                                        | 2919                               | 276                                   | 02647                                             | 11094                              |
| <i>gldD</i> <sup>†</sup>                                           | 1846                               | 100                                   | 04372                                             | 09625                              |
| <i>gldE</i>                                                        | 1845                               | 101                                   | 04377                                             | 09630                              |
| <i>gldH</i> <sup>†</sup>                                           | 1942                               | 163                                   | 04977                                             | 10425                              |
| <i>gldJ</i> <sup>†</sup>                                           | 1079                               | 1191                                  | 06665                                             | 05565                              |
| Peptidopropyl isomerase ( <i>Flavobacteriia</i> , protein folding) |                                    |                                       |                                                   |                                    |
| <i>gldI</i>                                                        | 731                                | 2020                                  | 11847                                             | 01370                              |
| PorS secretion system (secretion of RemA/RemB and SprA/SprB)       |                                    |                                       |                                                   |                                    |
| <i>gldK</i> <sup>†</sup>                                           | 2873                               | 313                                   | 02182                                             | 11294                              |
| <i>gldL</i> <sup>†</sup>                                           | 2872                               | 314                                   | 02177                                             | 11299                              |
| <i>gldM</i> <sup>†</sup>                                           | 2871                               | 315                                   | 02172                                             | 11304                              |
| <i>gldN</i> <sup>†</sup>                                           | 2870                               | 316                                   | 02167                                             | 11309                              |
| <i>sprA</i> <sup>†</sup>                                           | 2442                               | 2464                                  | 03352                                             | 06695                              |
| <i>sprE</i> <sup>†</sup>                                           | 2360                               | 1050                                  | 03652                                             | 08385                              |
| <i>sprT</i> <sup>†</sup>                                           | 1298                               | 554                                   | 04307                                             | 12684                              |

\* CDS in this genome are numbered in steps of 5 in the original annotation

<sup>†</sup> essential gliding motility genes (McBride & Zhu, 2013)
